# Supplementary material for: HGT-Finder: A New Tool for Horizontal Gene Transfer Finding and Application to Aspergillus genomes
Source: MDPI journal article supplement (doi:10.3390/toxins7104035), 2015-10-09

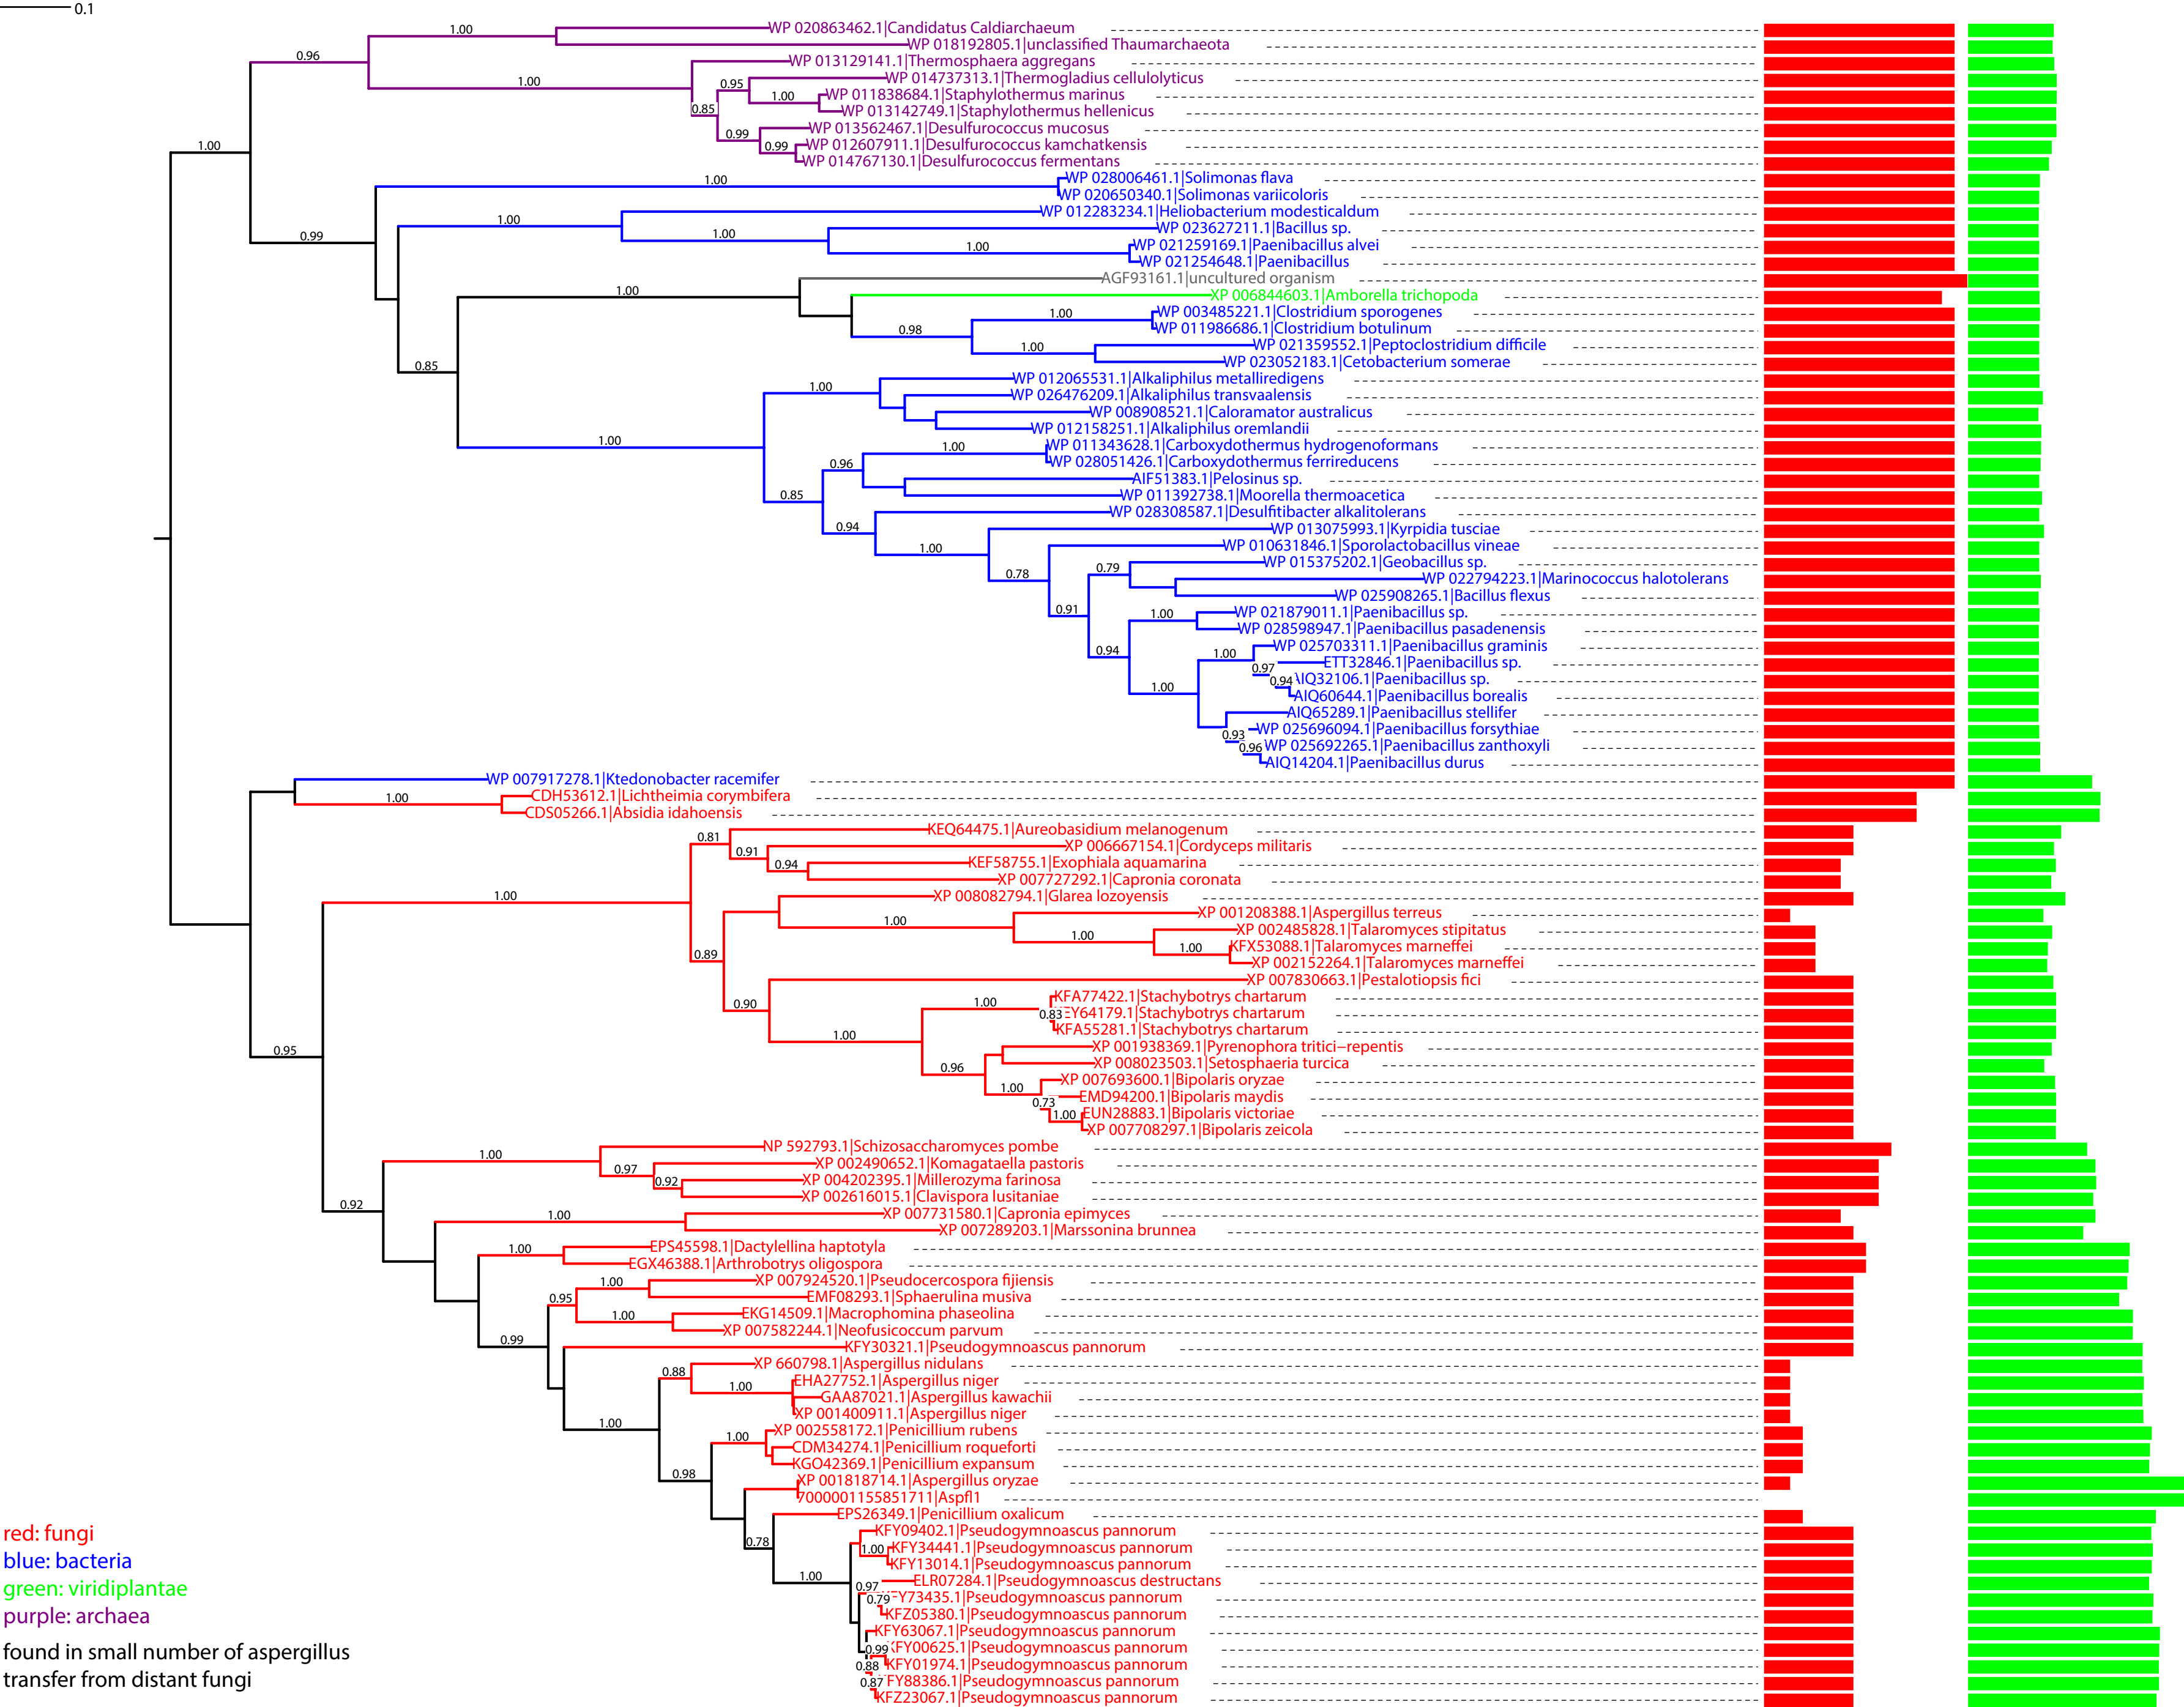

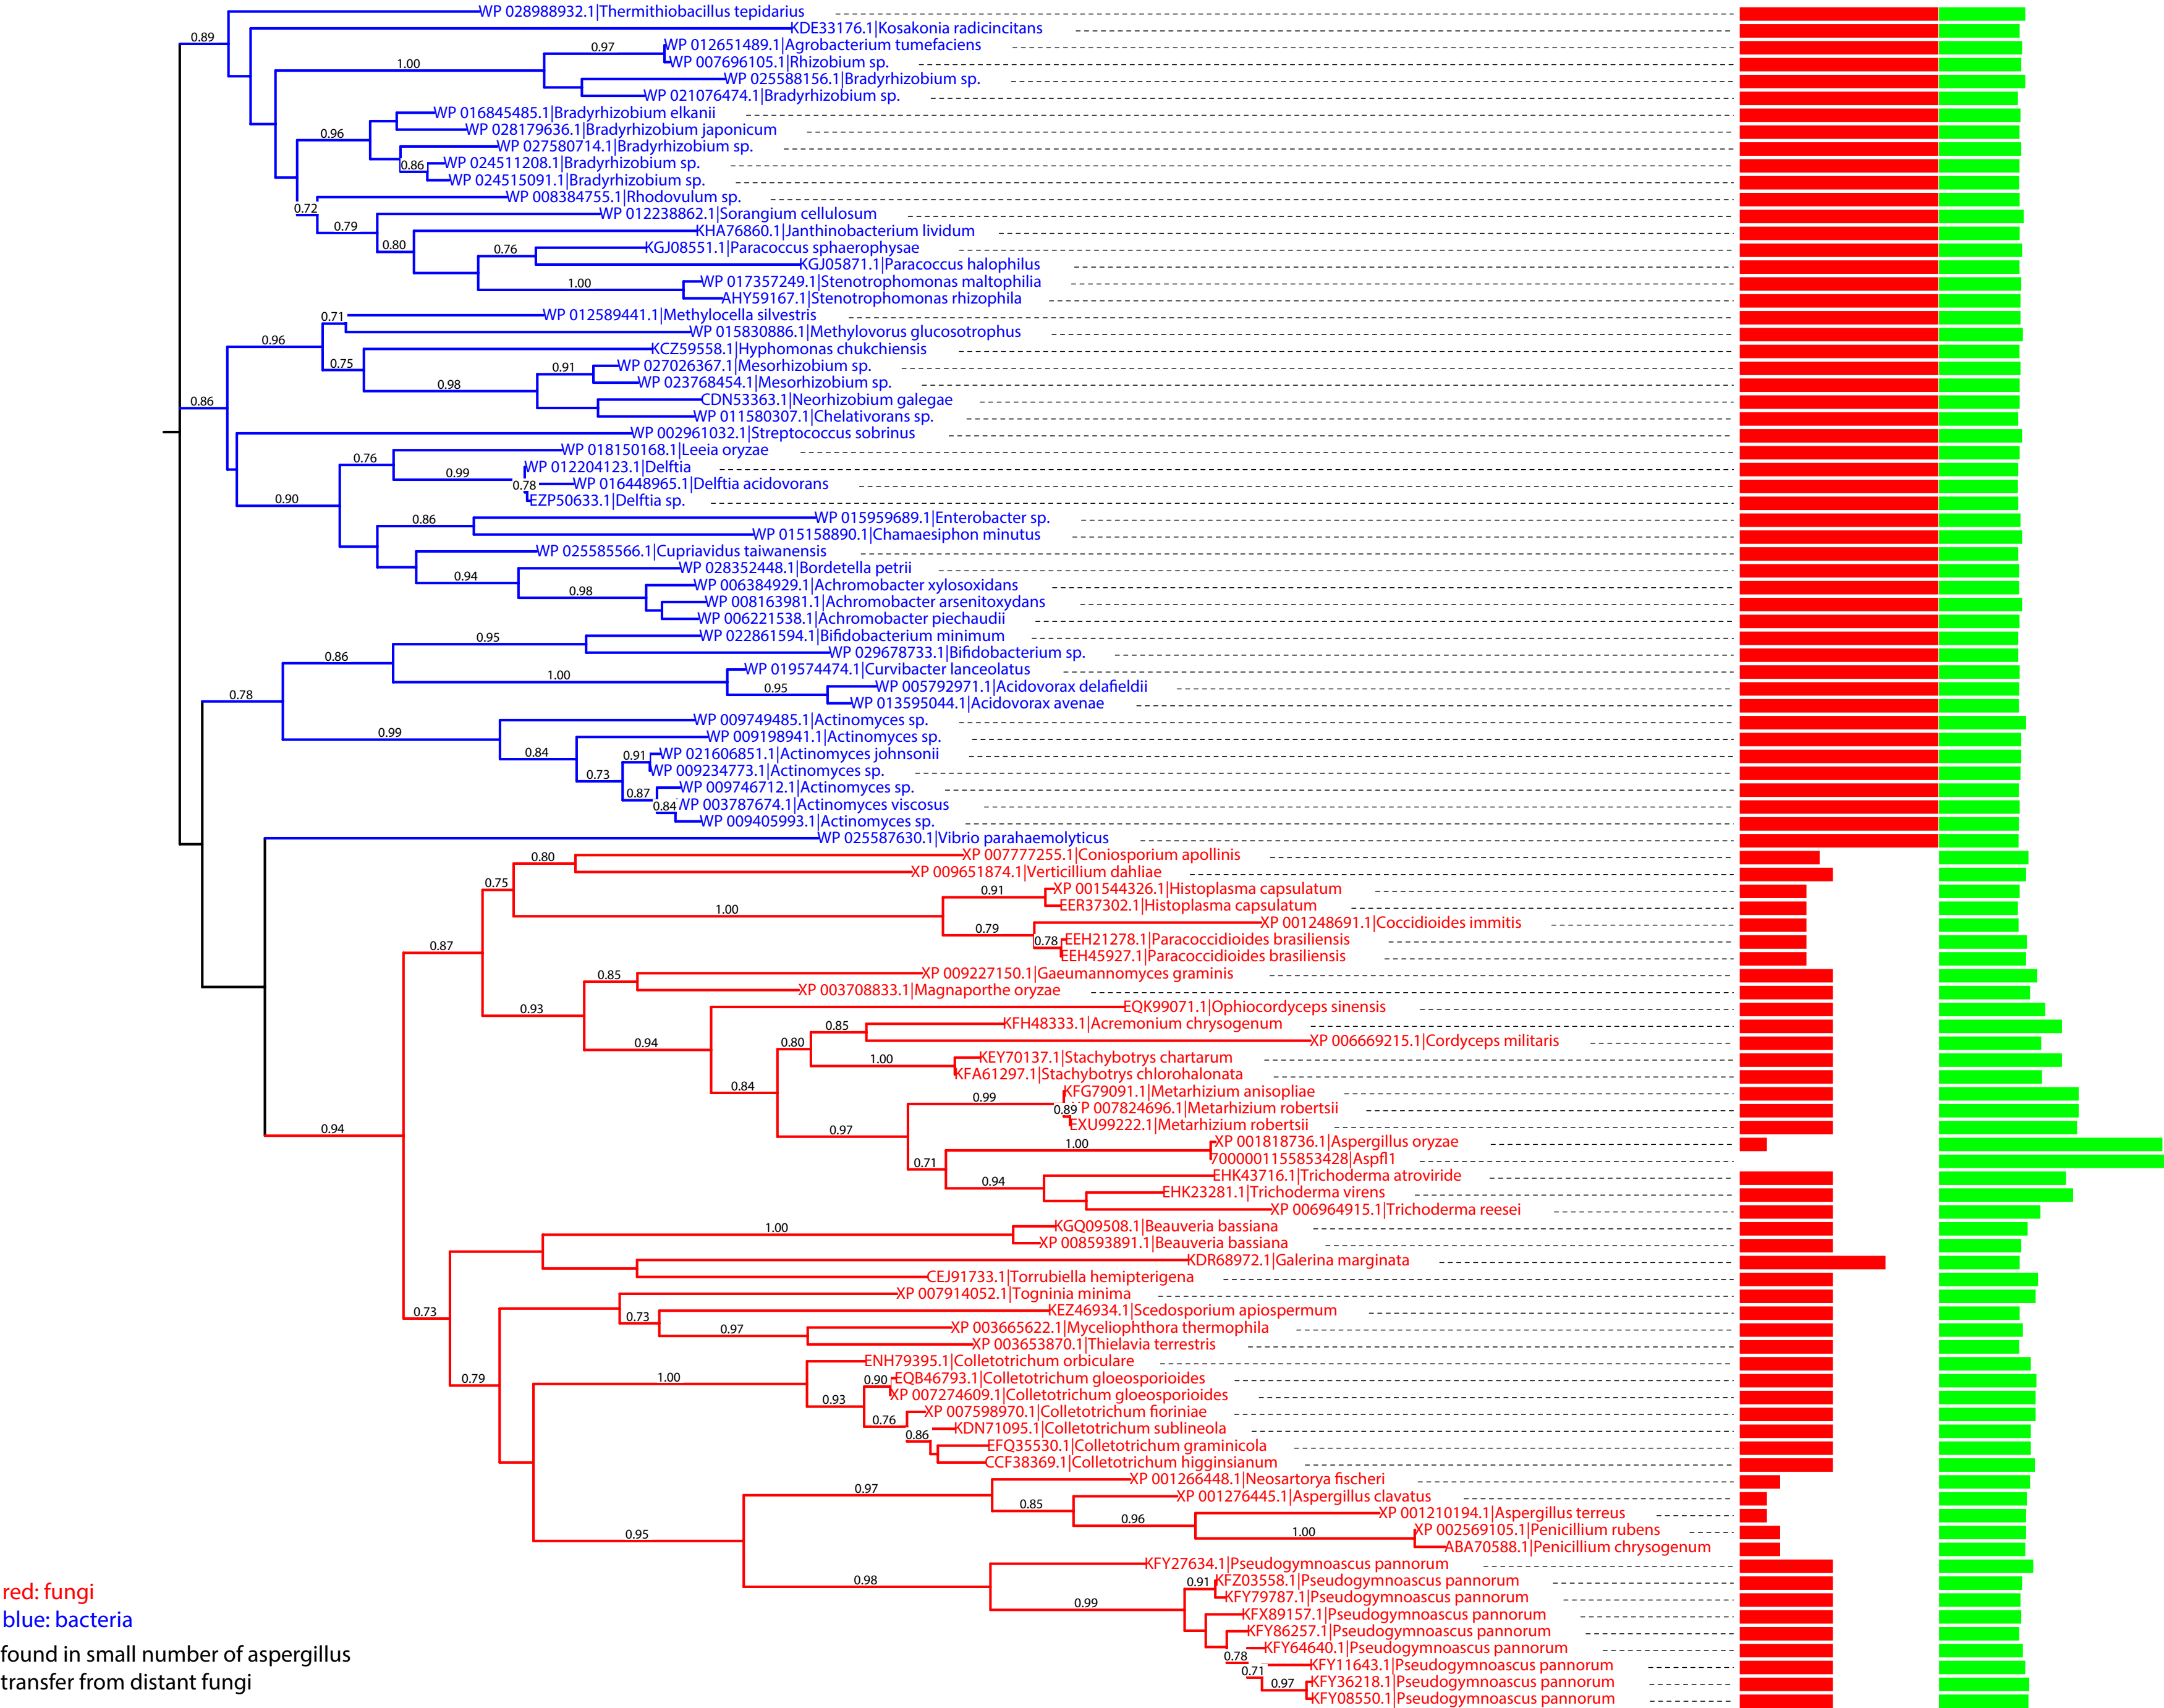

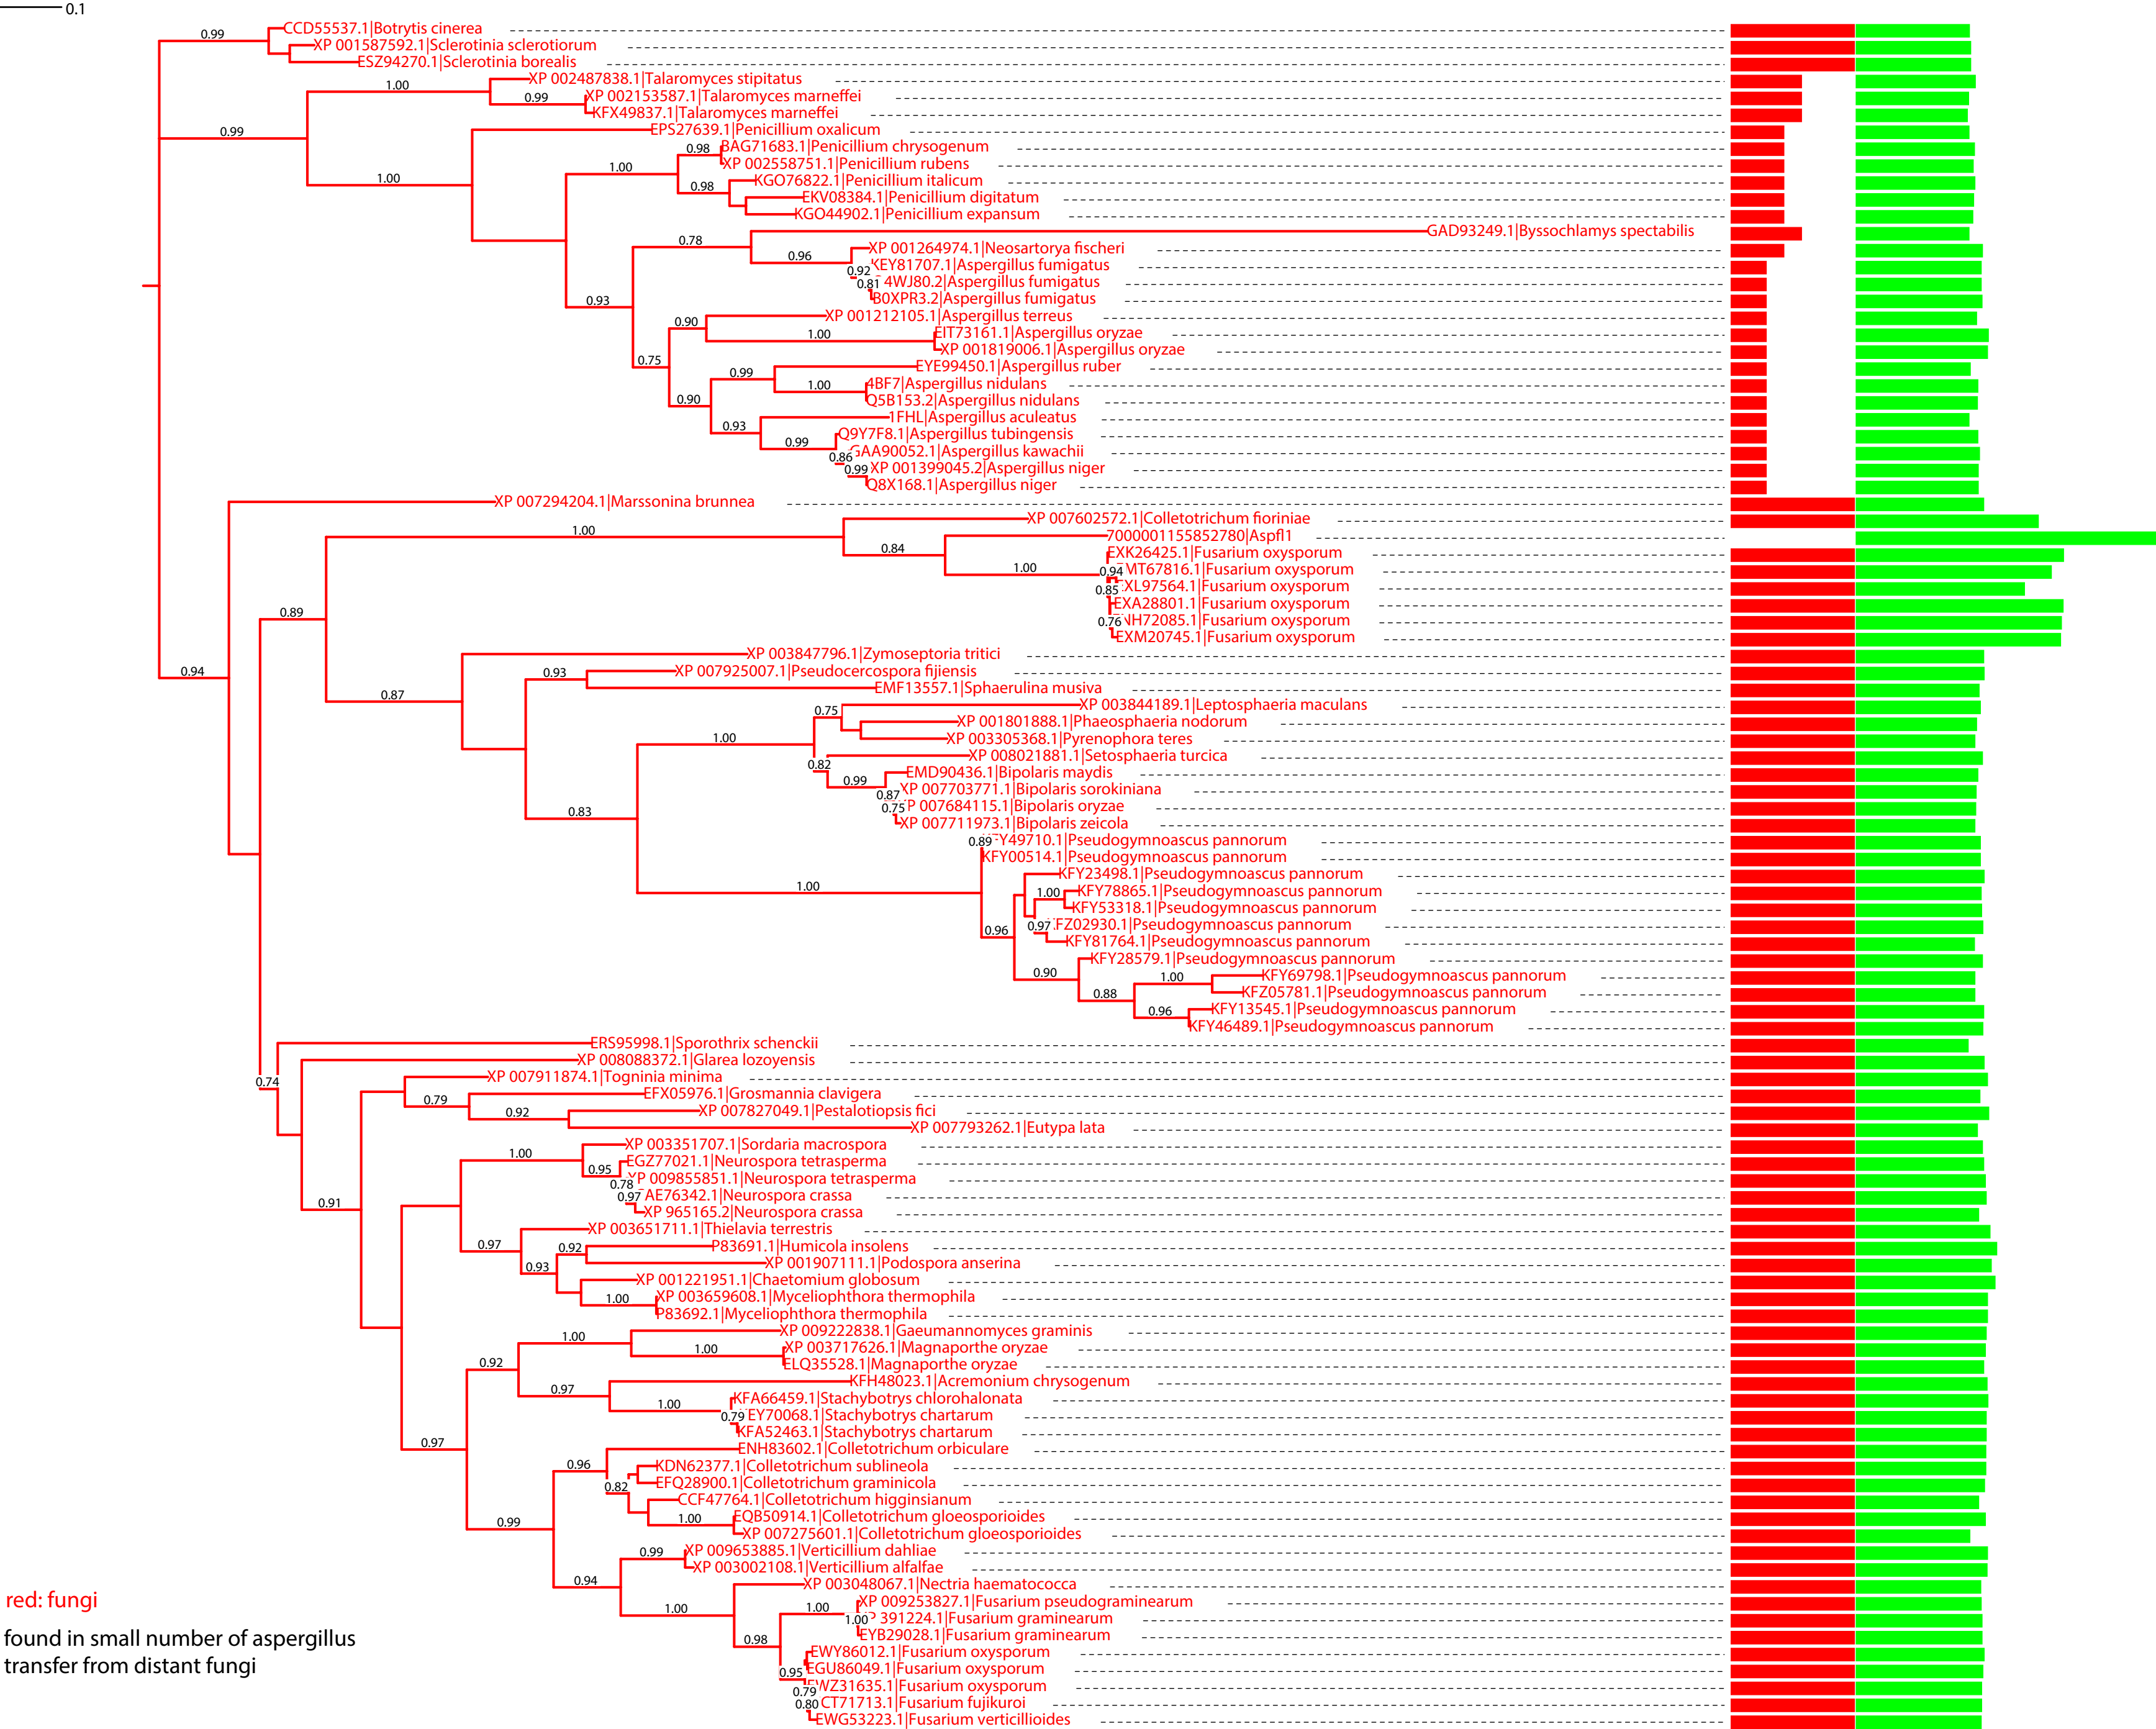

0.1

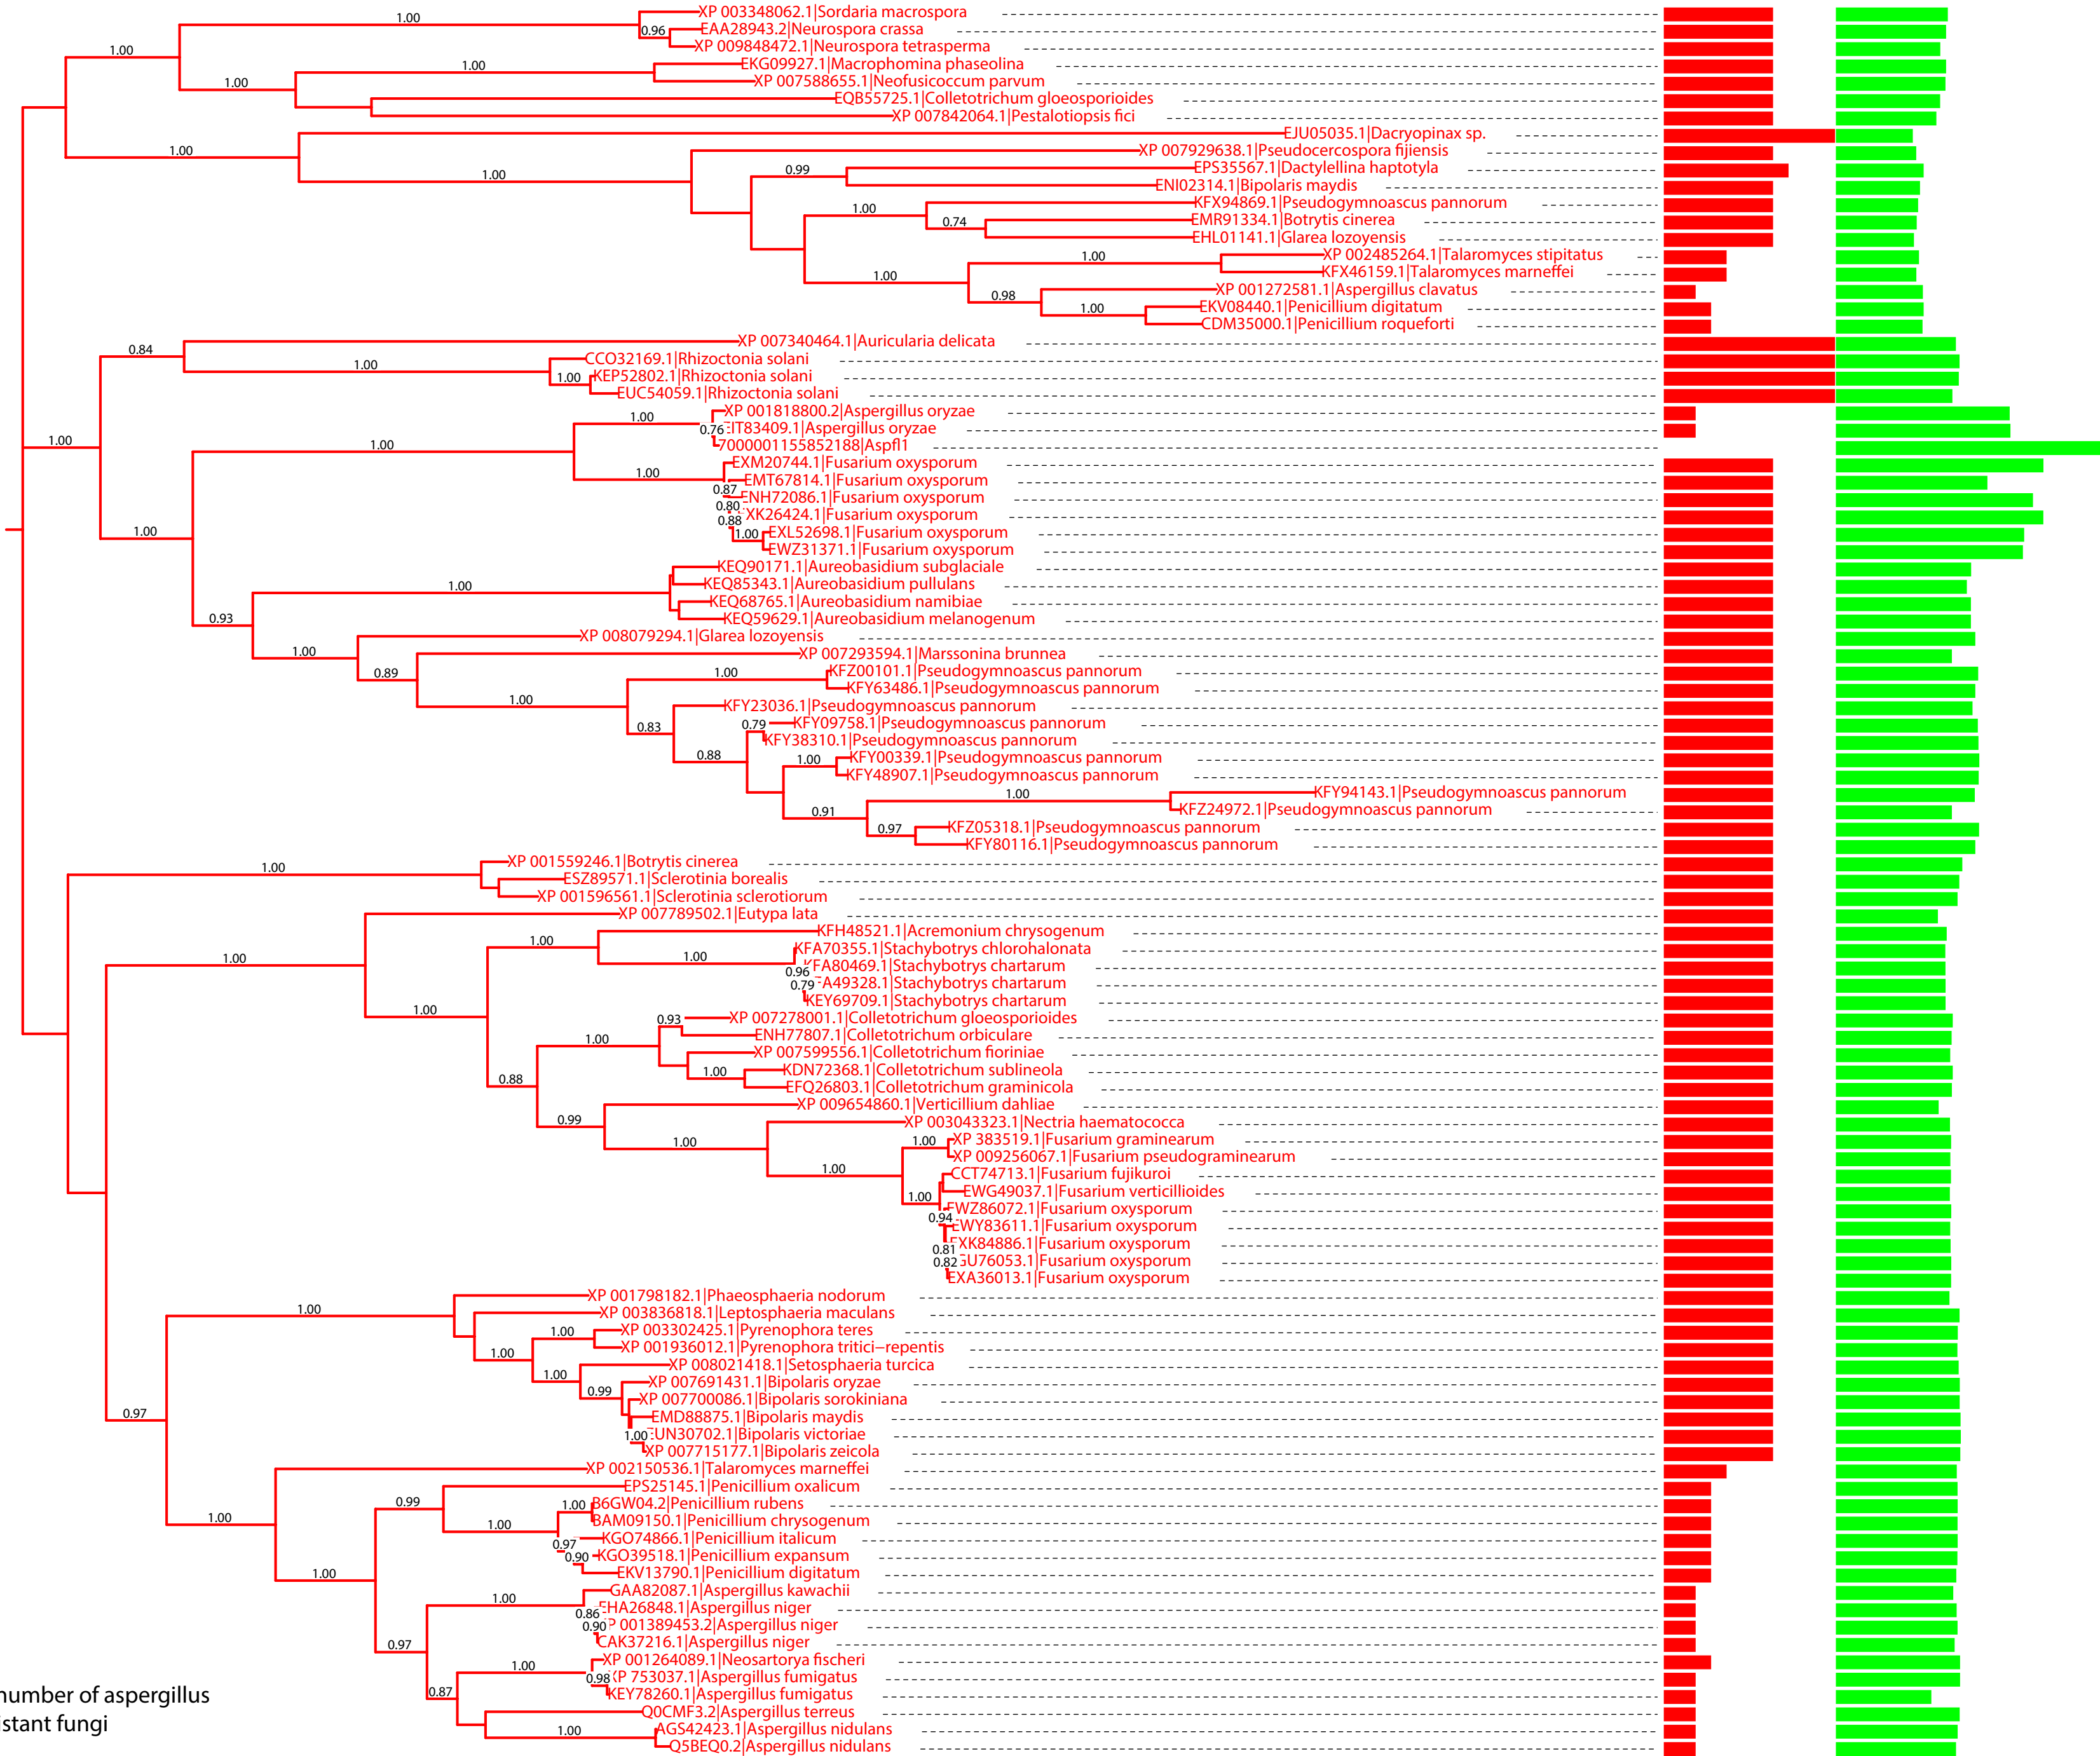

red: fungi  
found in small number of aspergillus  
transfer from distant fungi

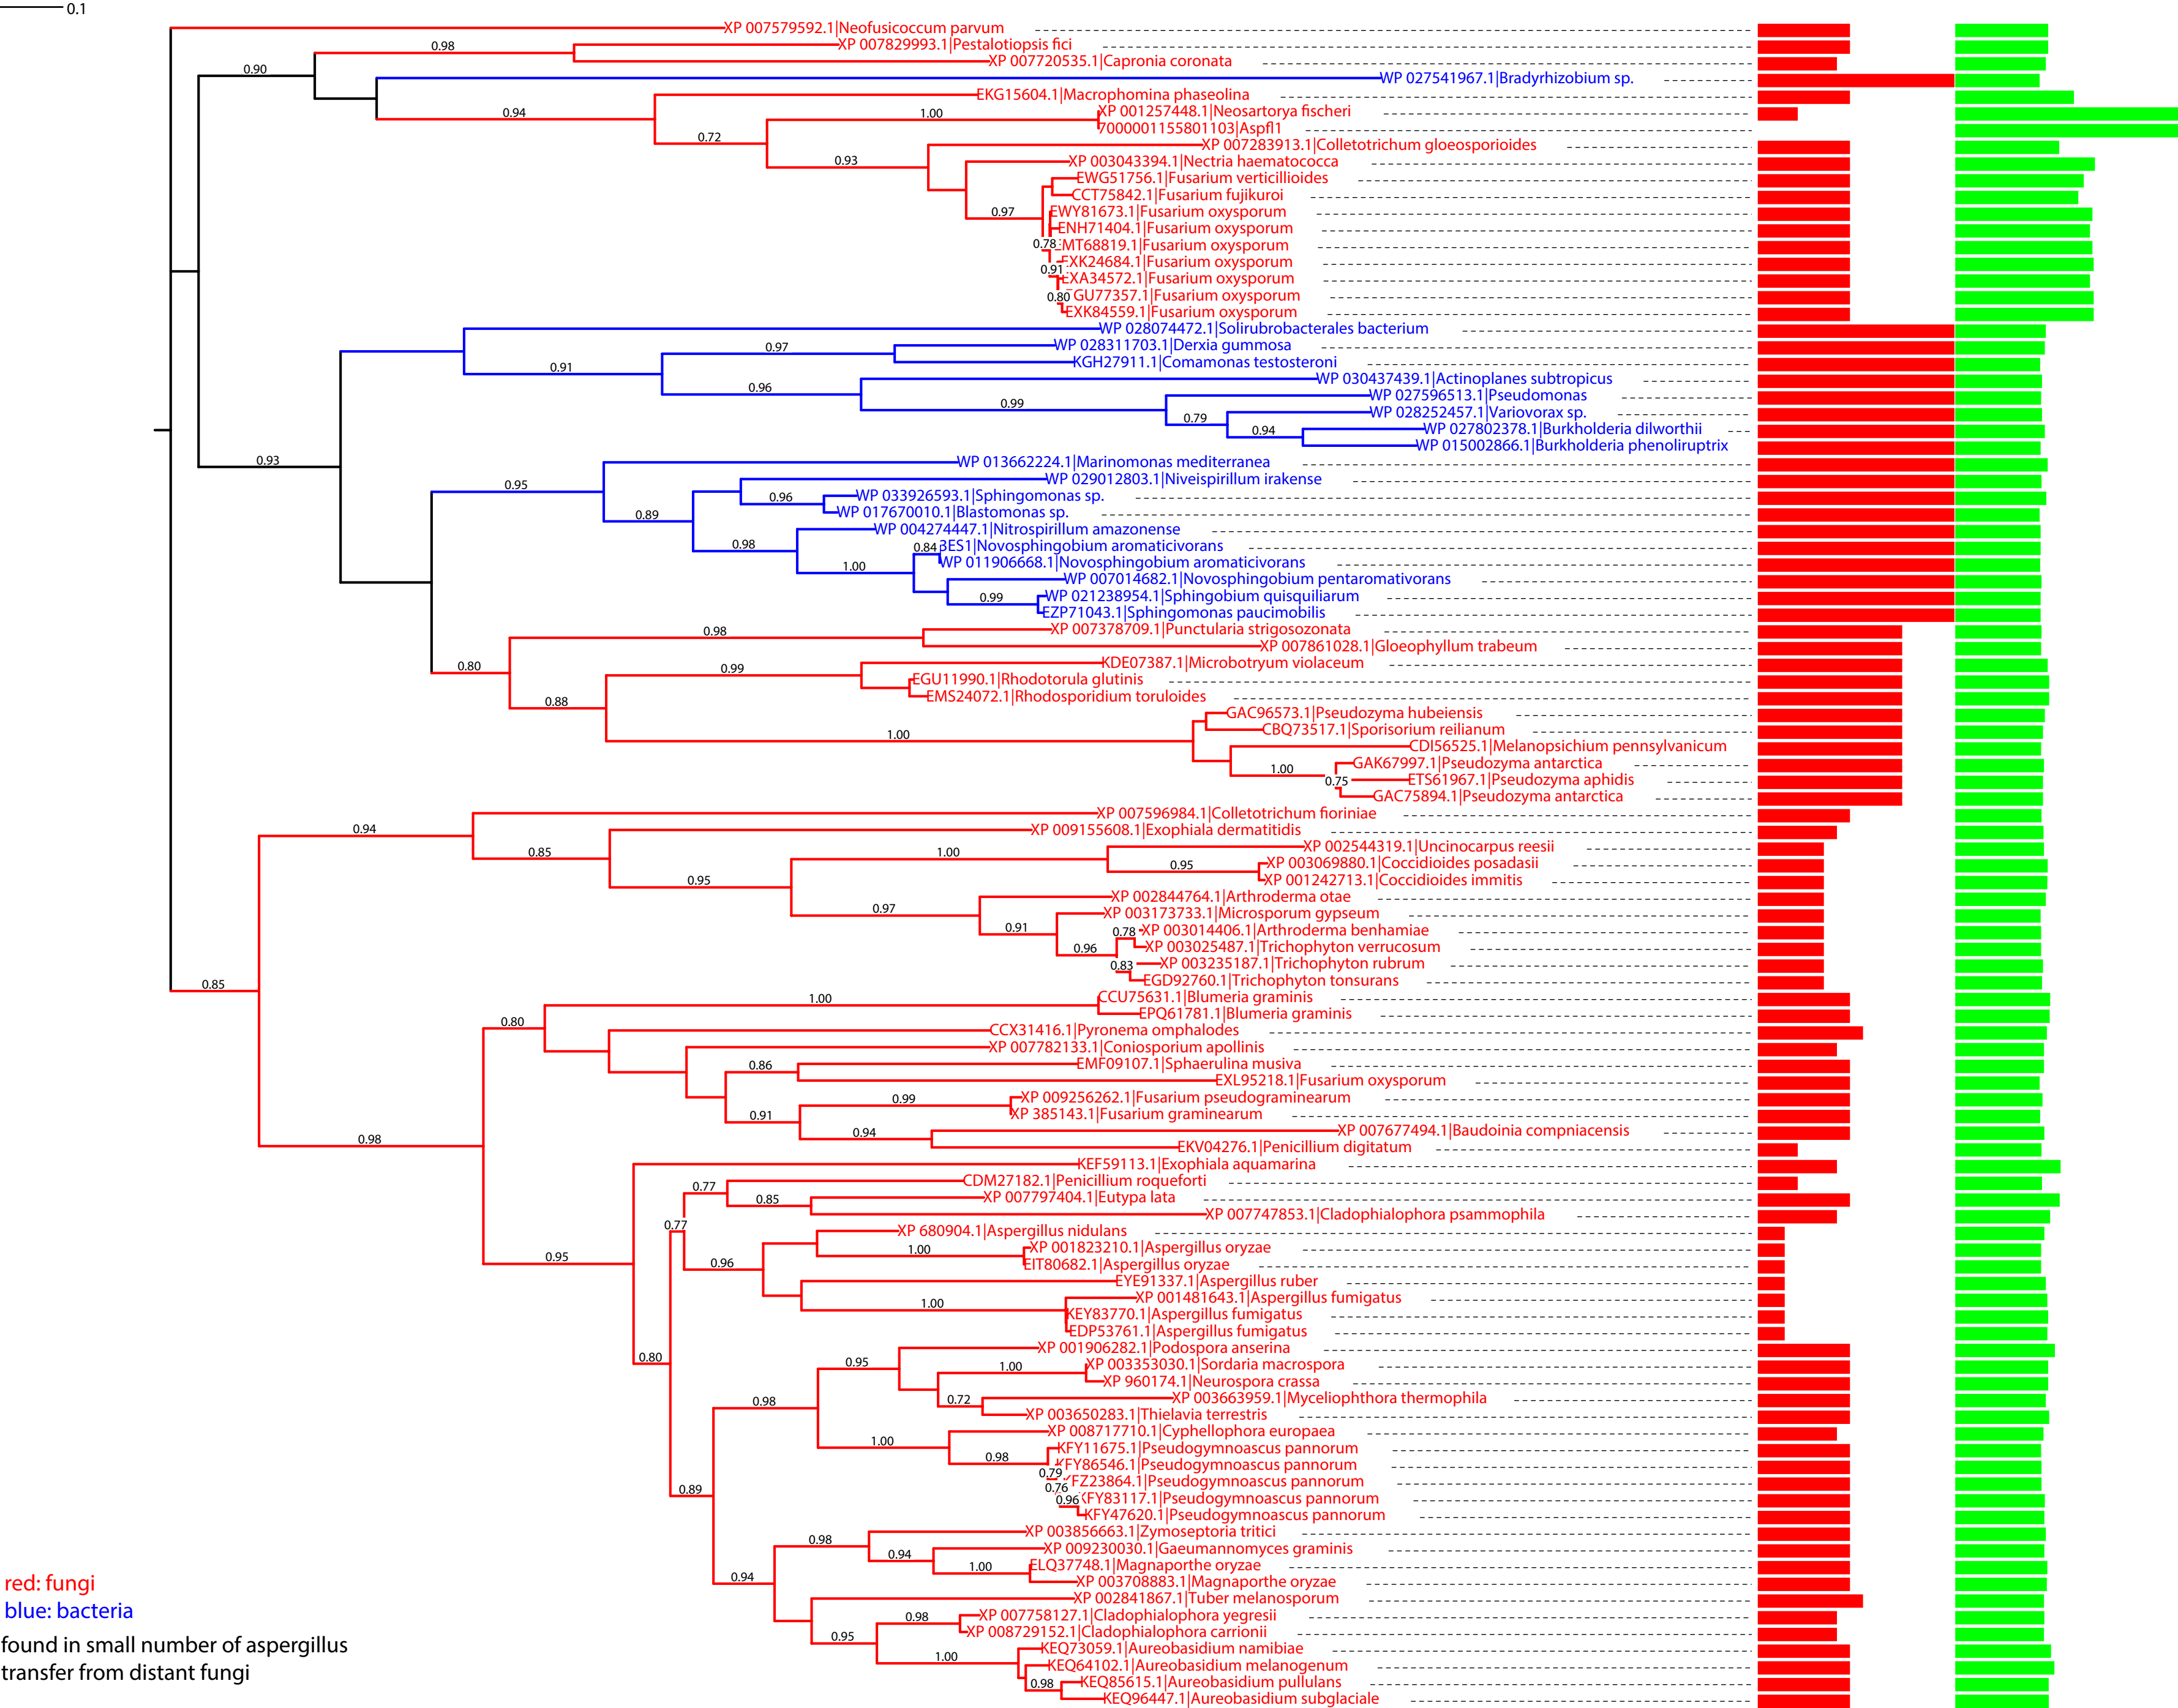

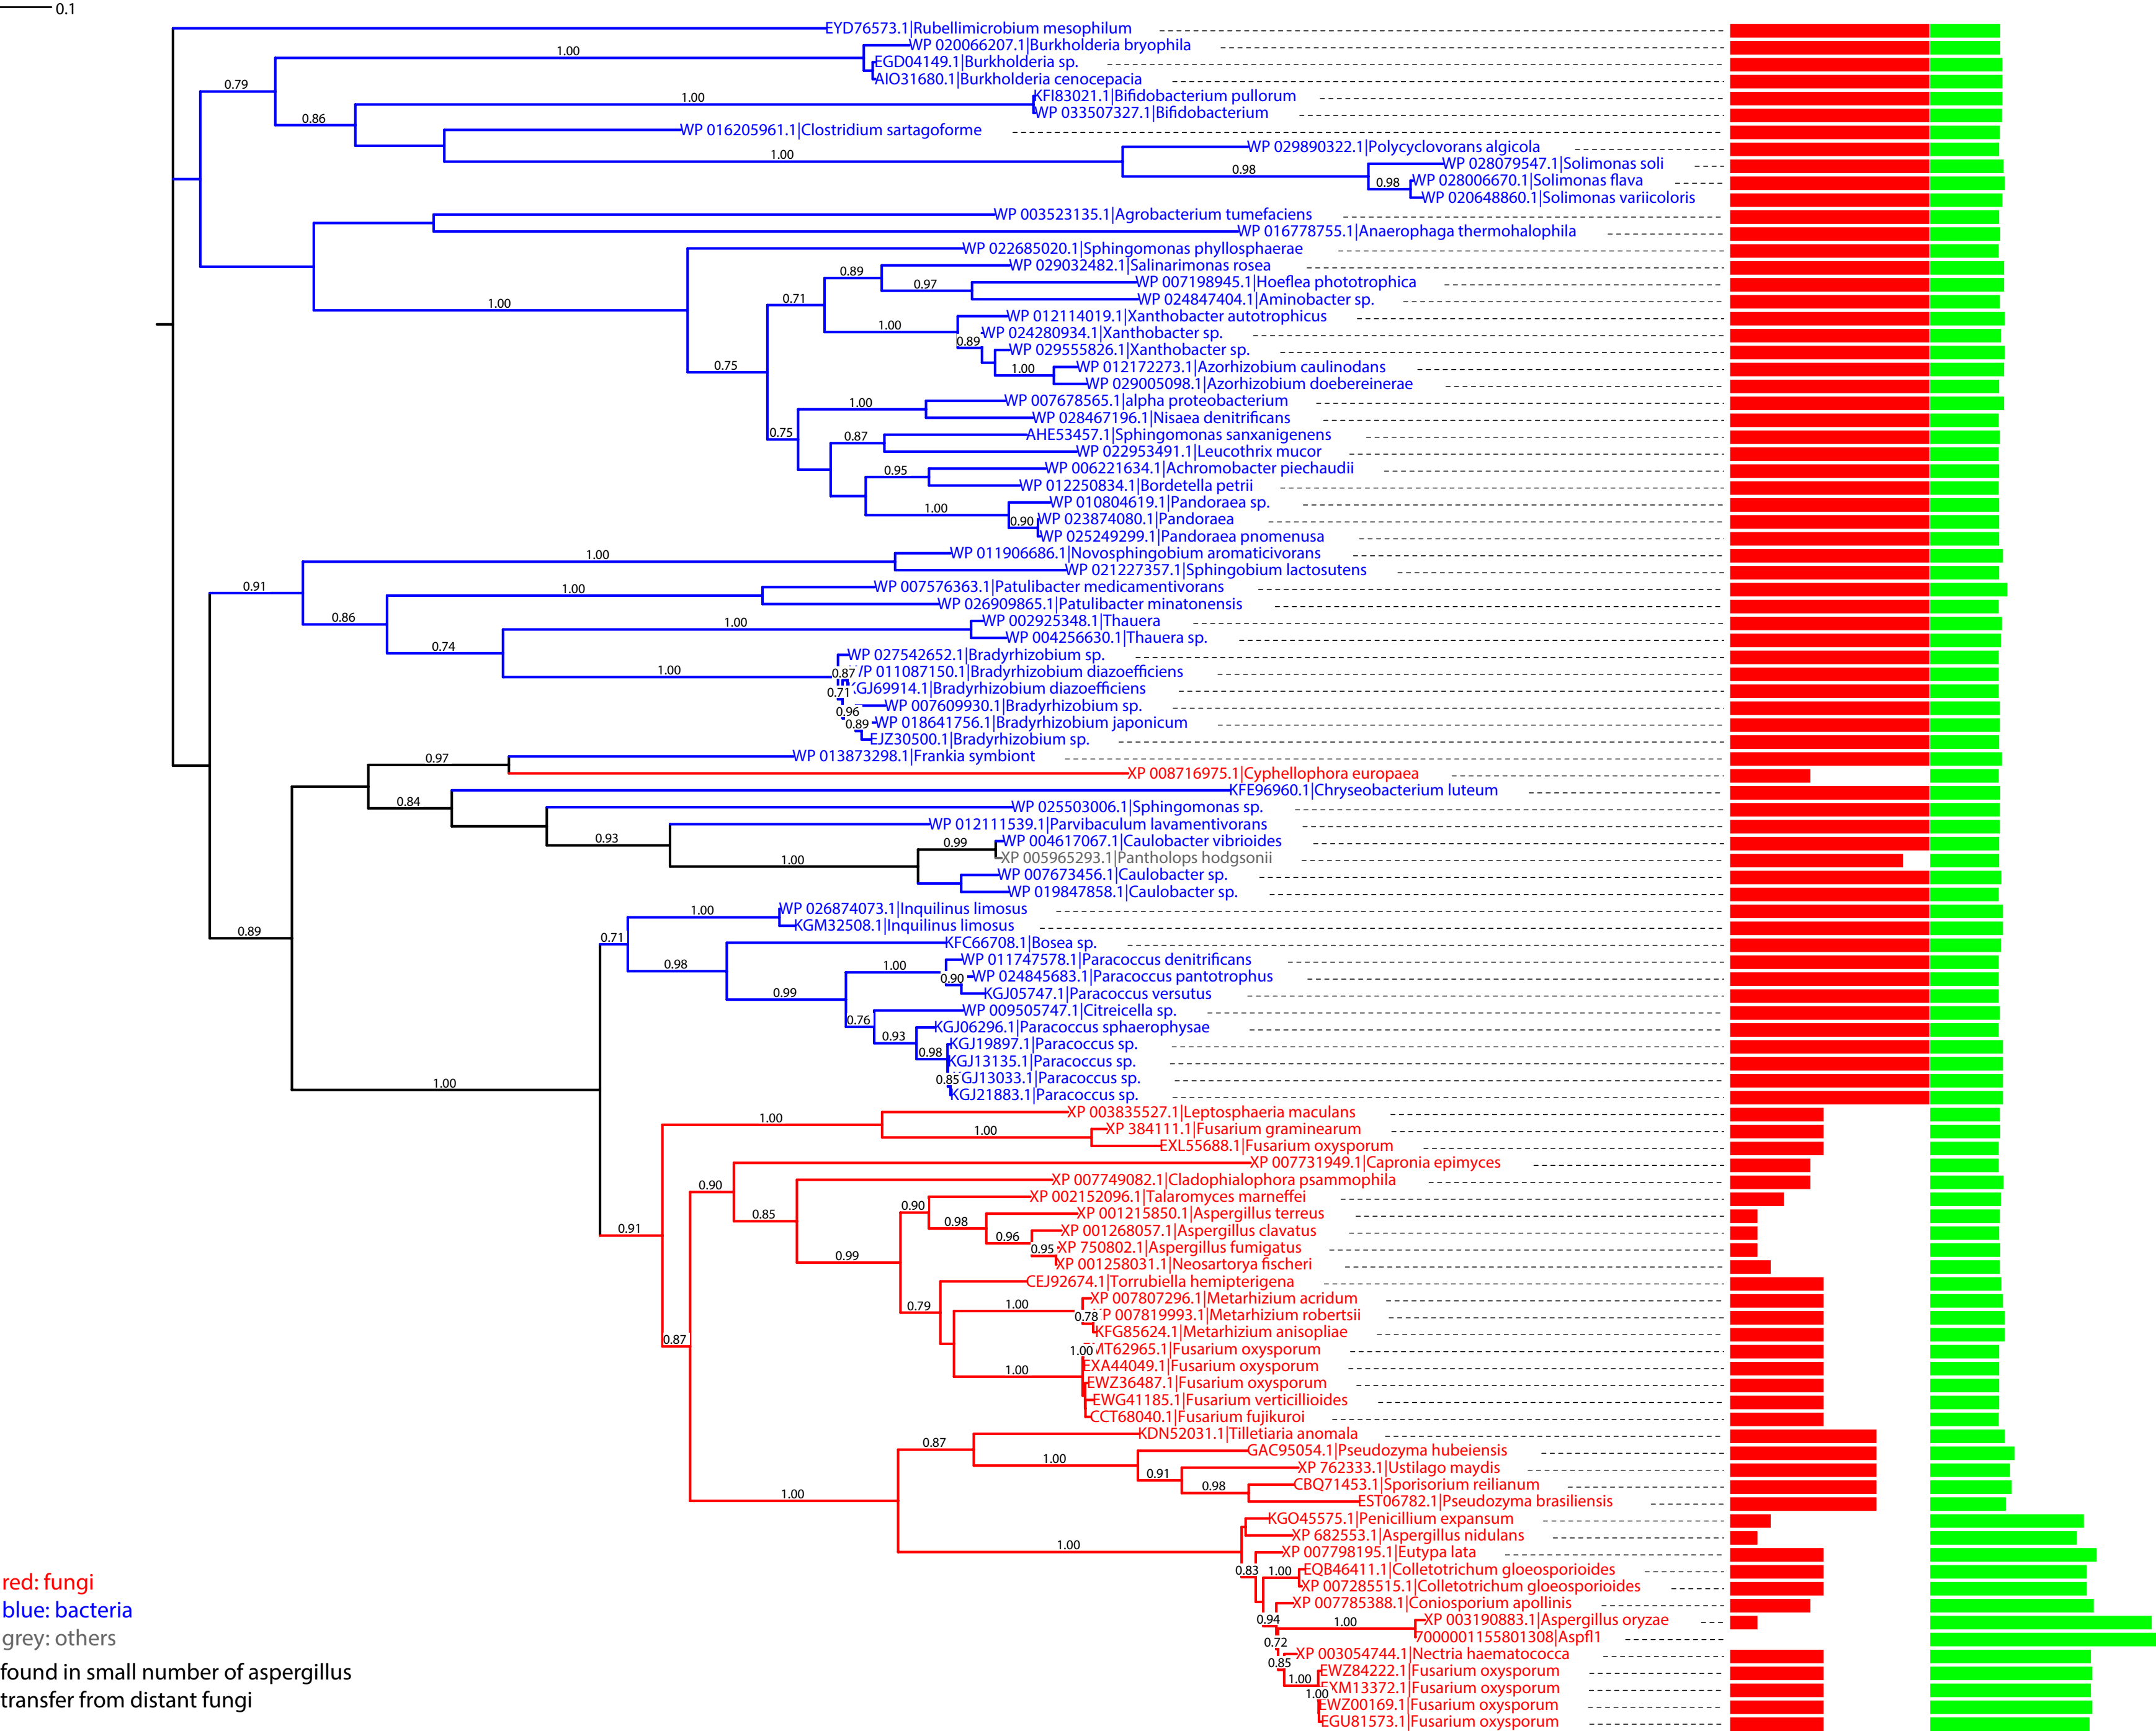

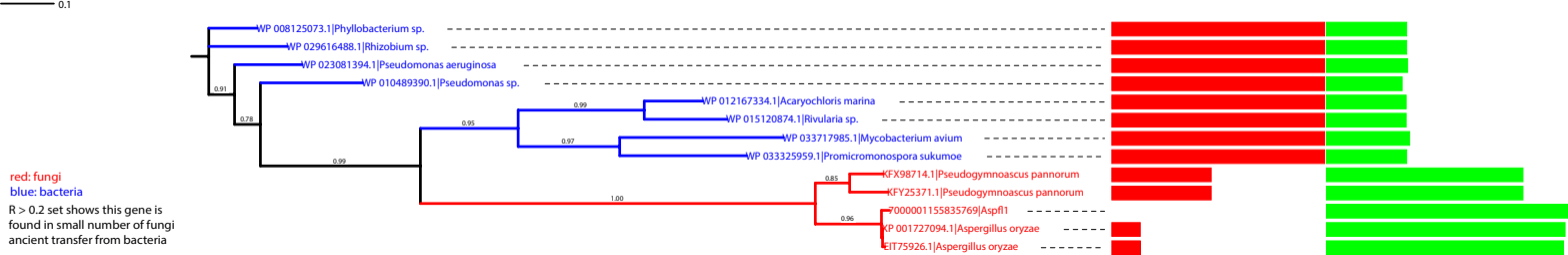

0.1

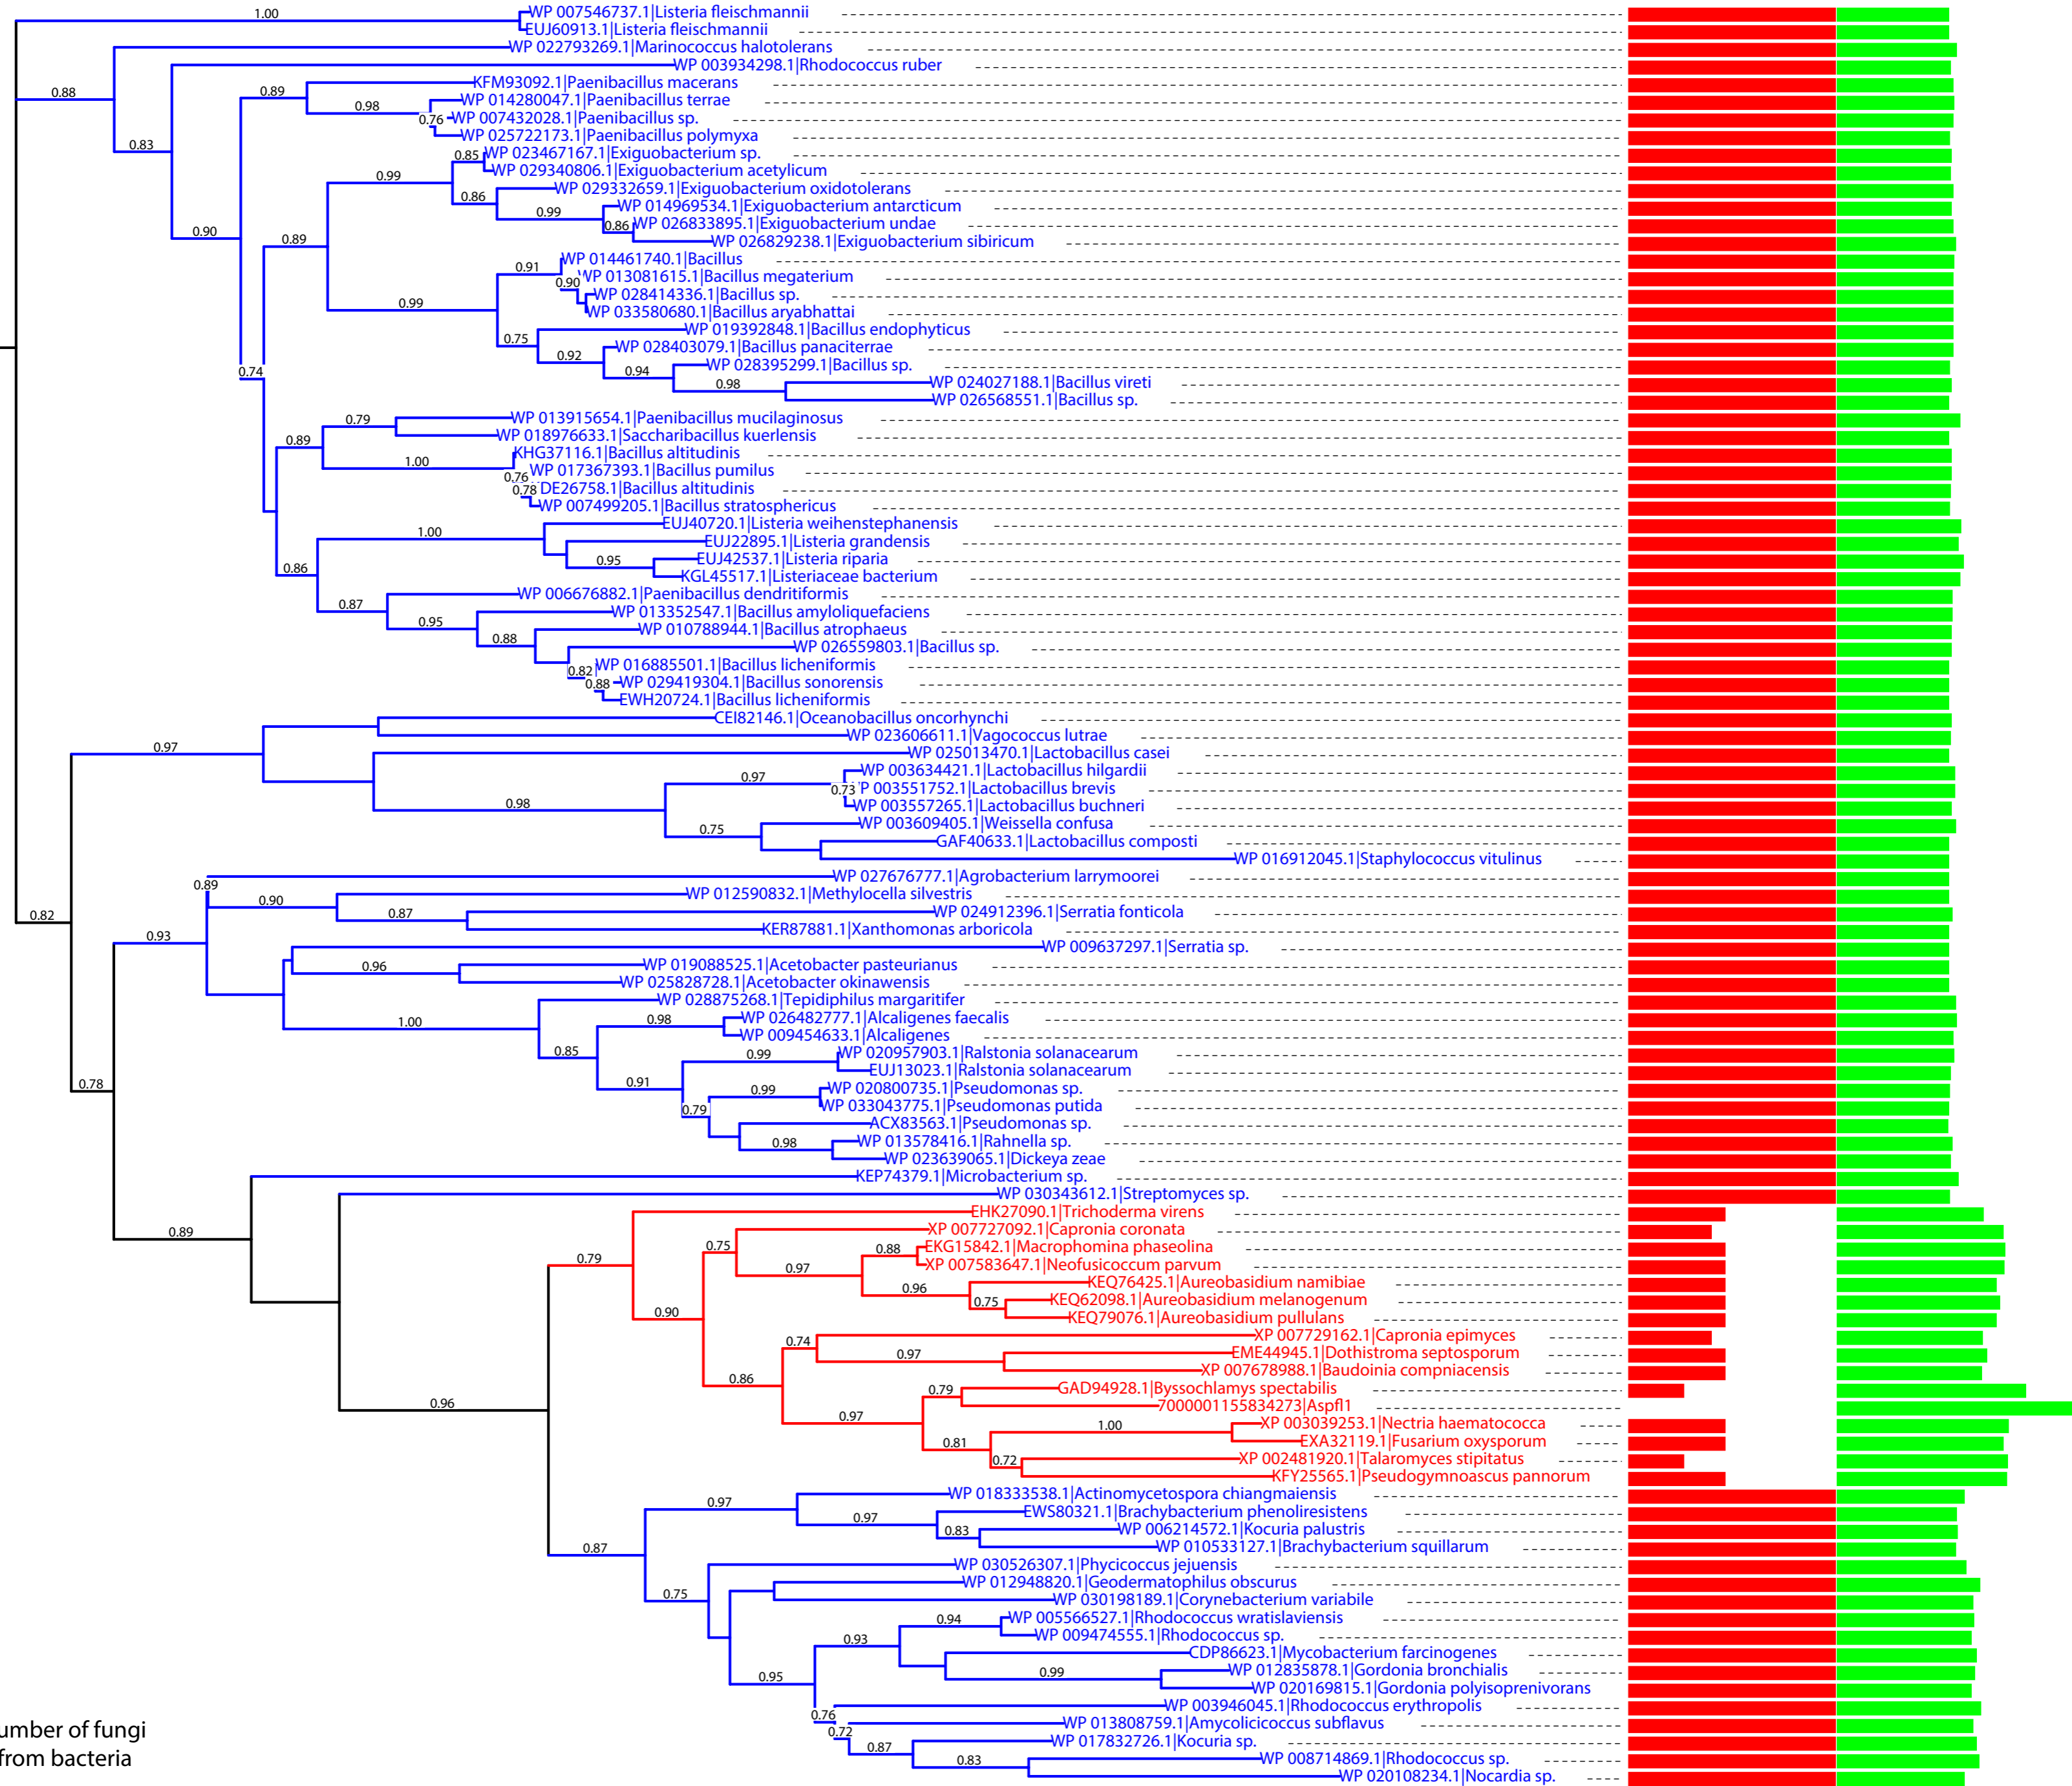

red: fungi  
blue: bacteria  
found in small number of fungi  
ancient transfer from bacteria

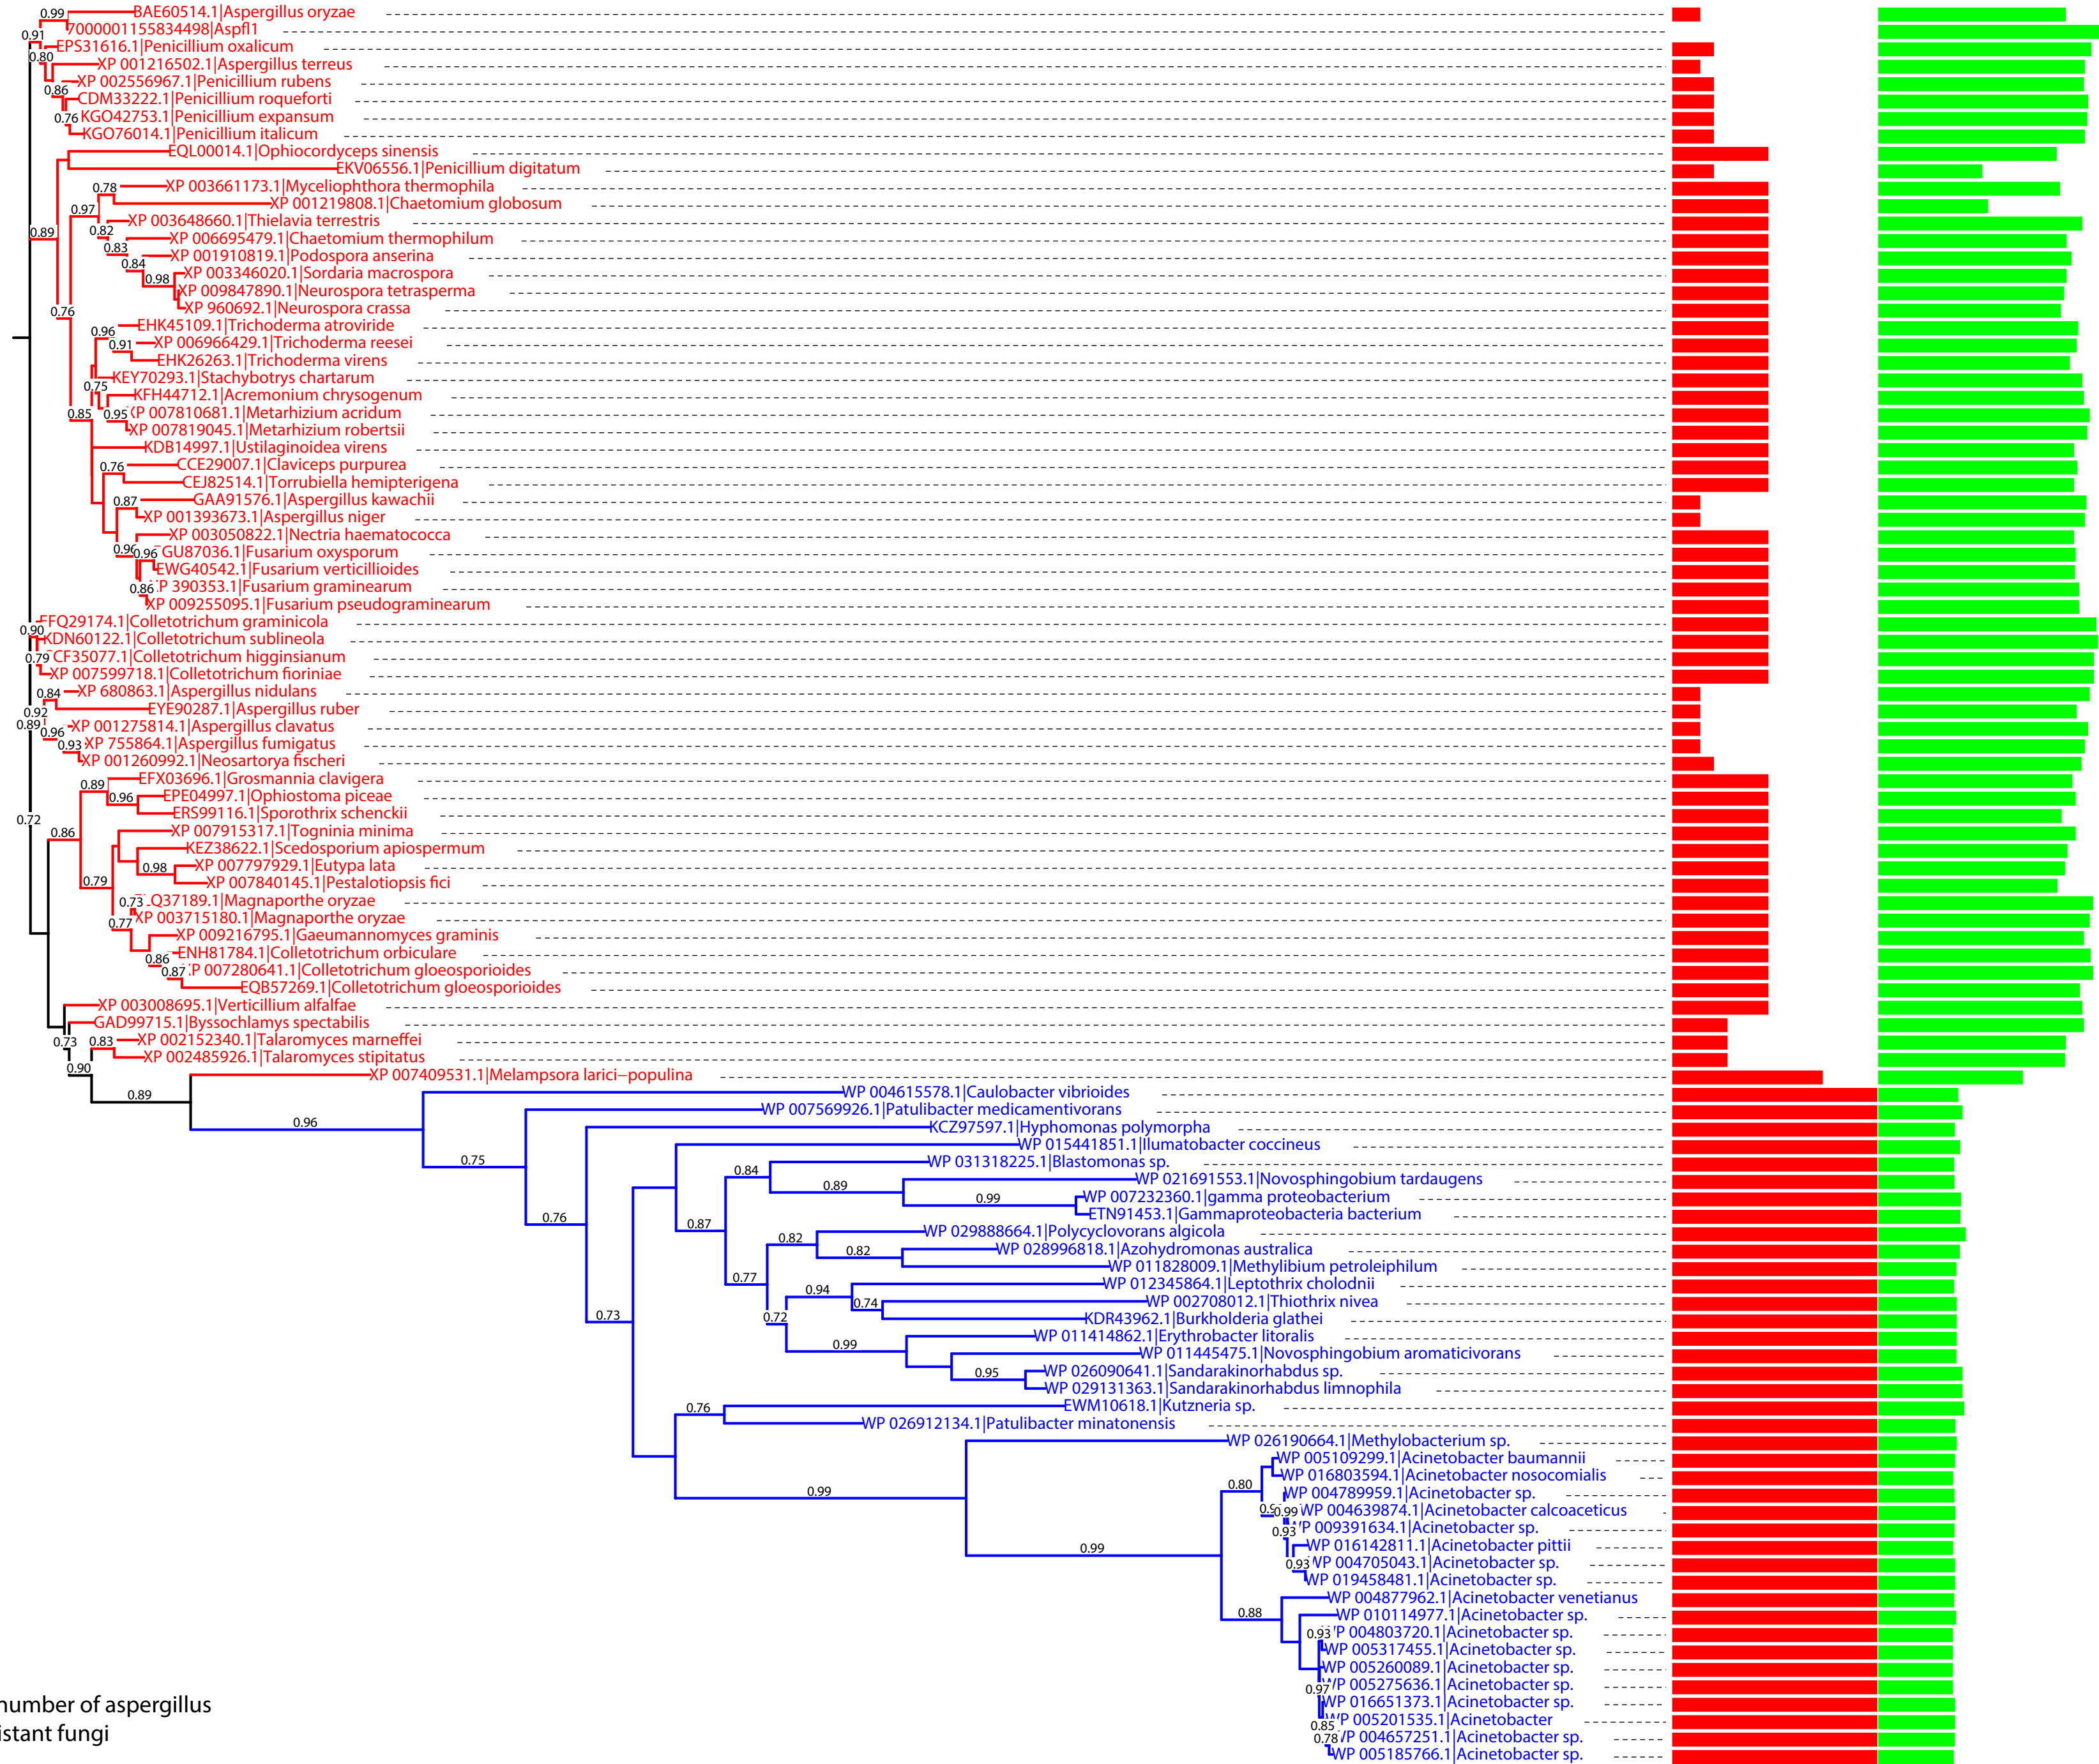

red: fungi  
blue: bacteria  
found in small number of aspergillus  
transfer from distant fungi

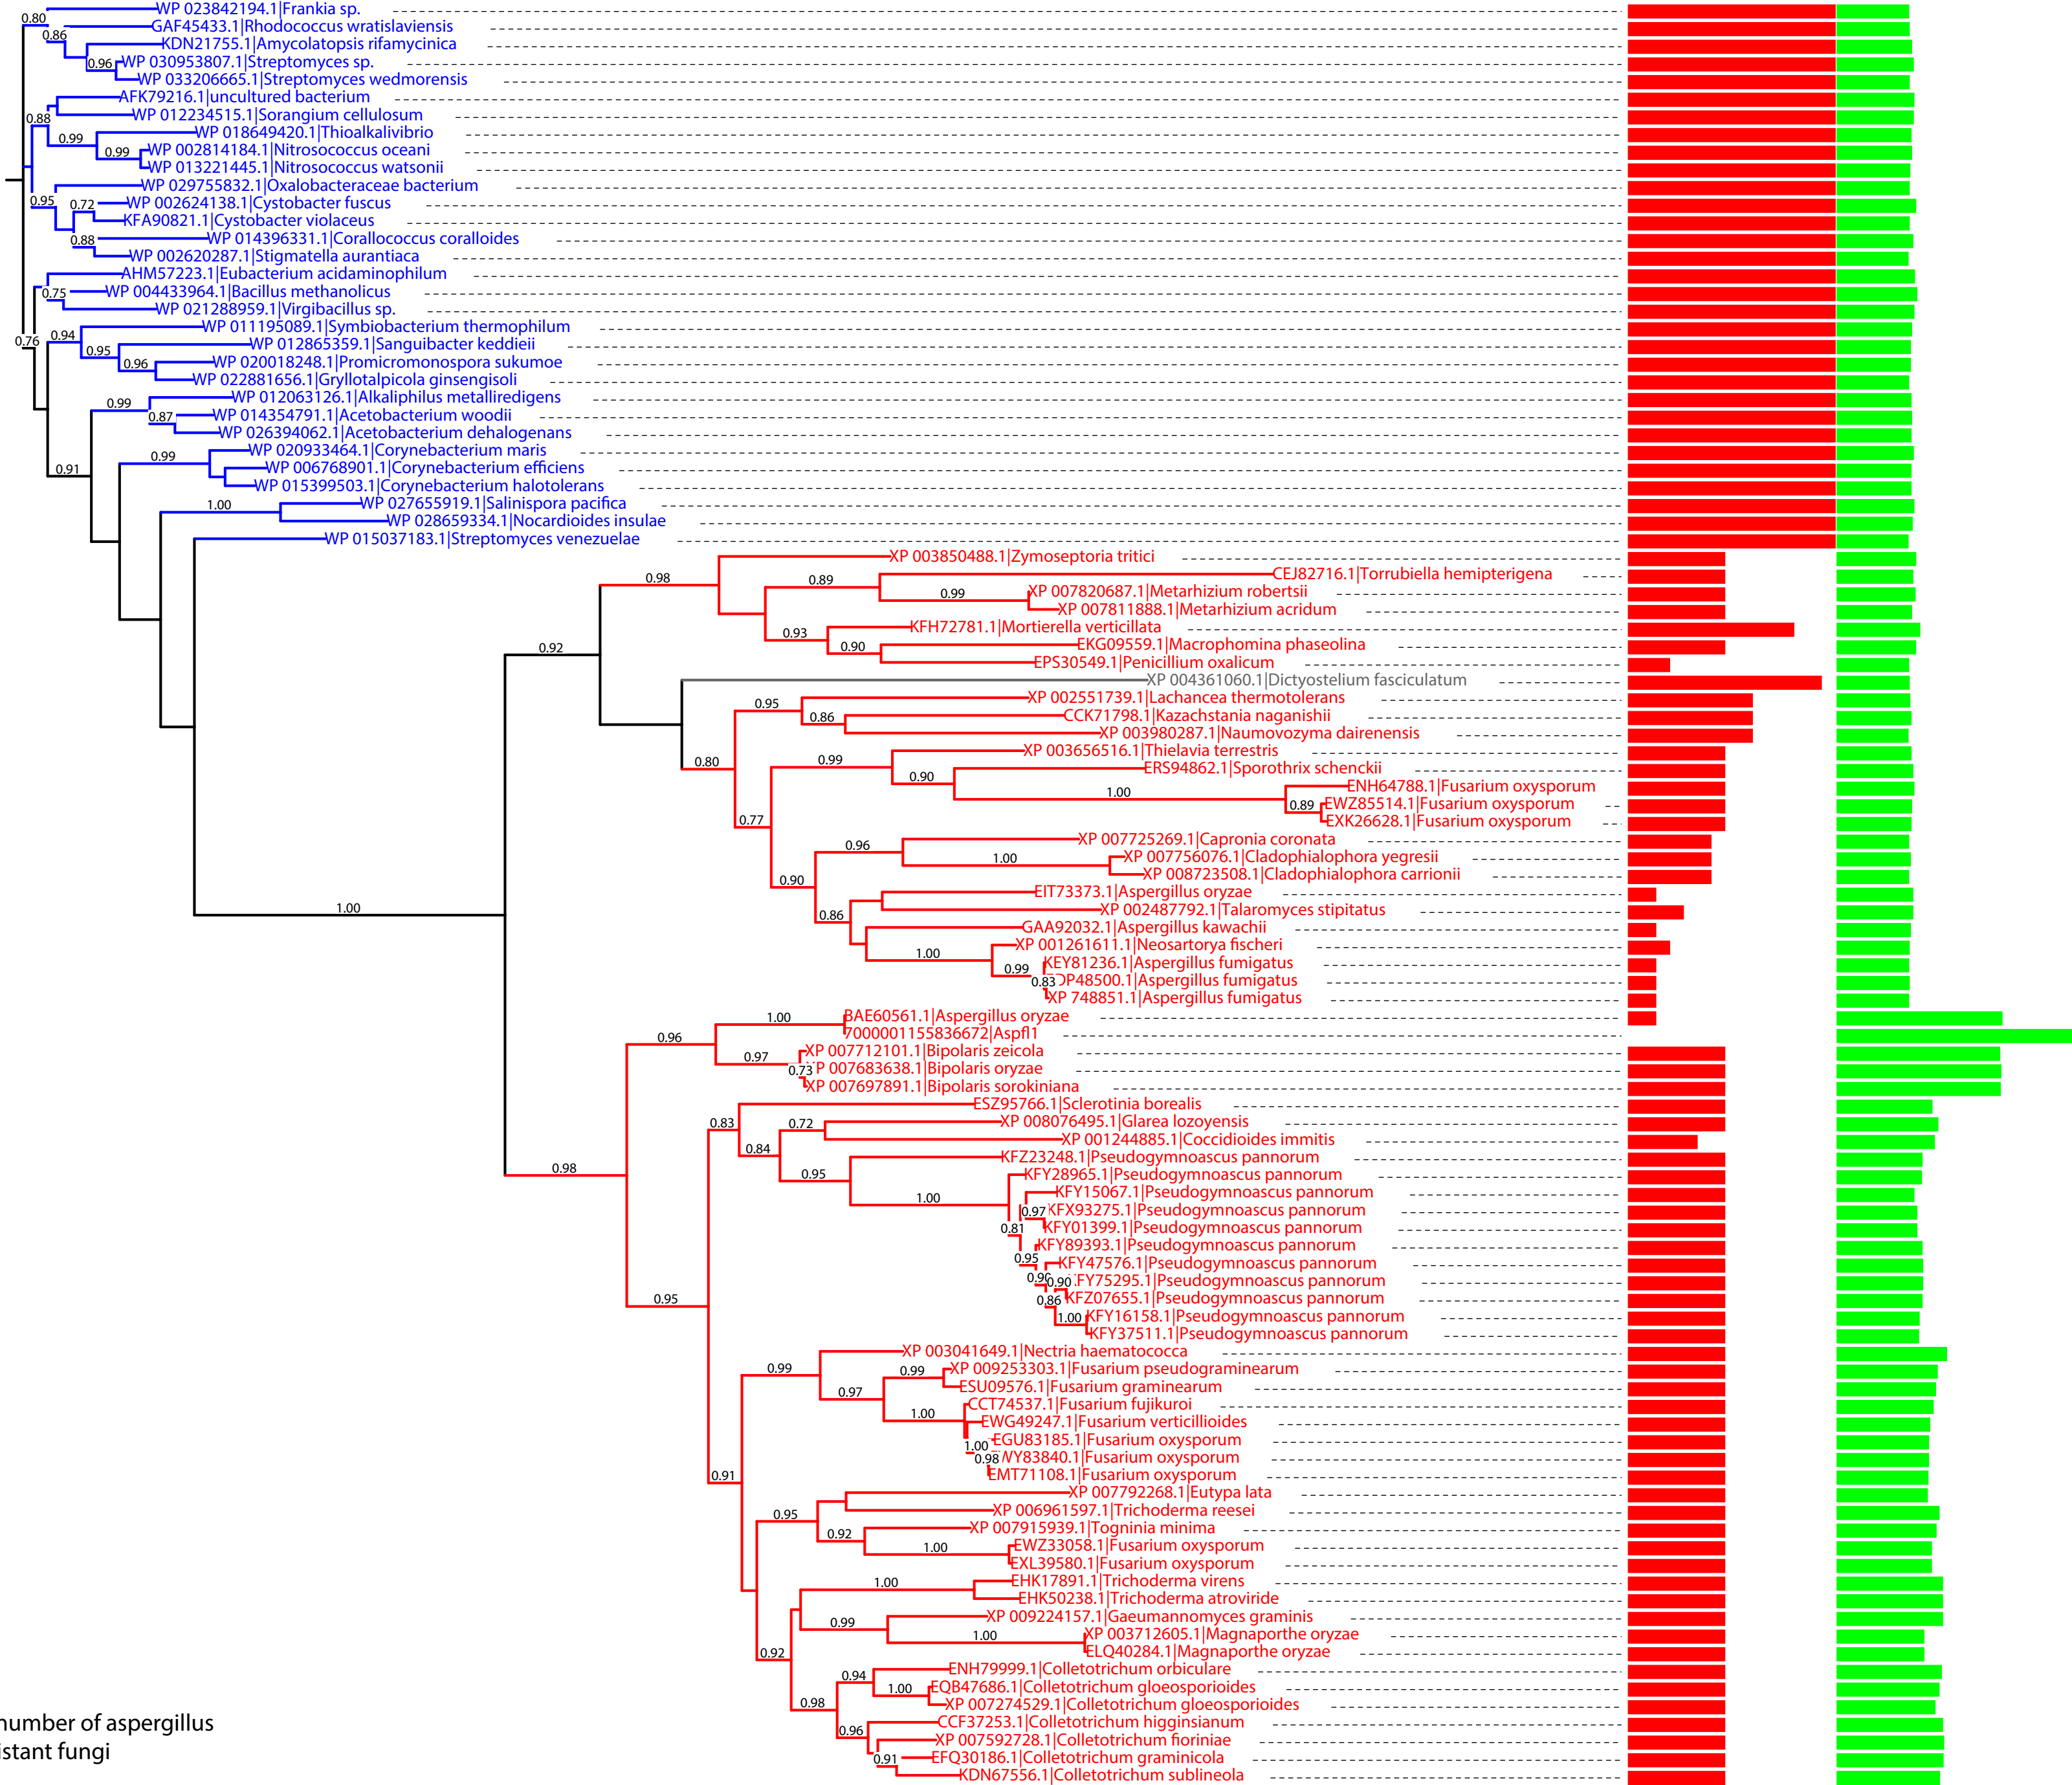

red: fungi

blue: bacteria

grey: others

found in small number of aspergillus

transfer from distant fungi



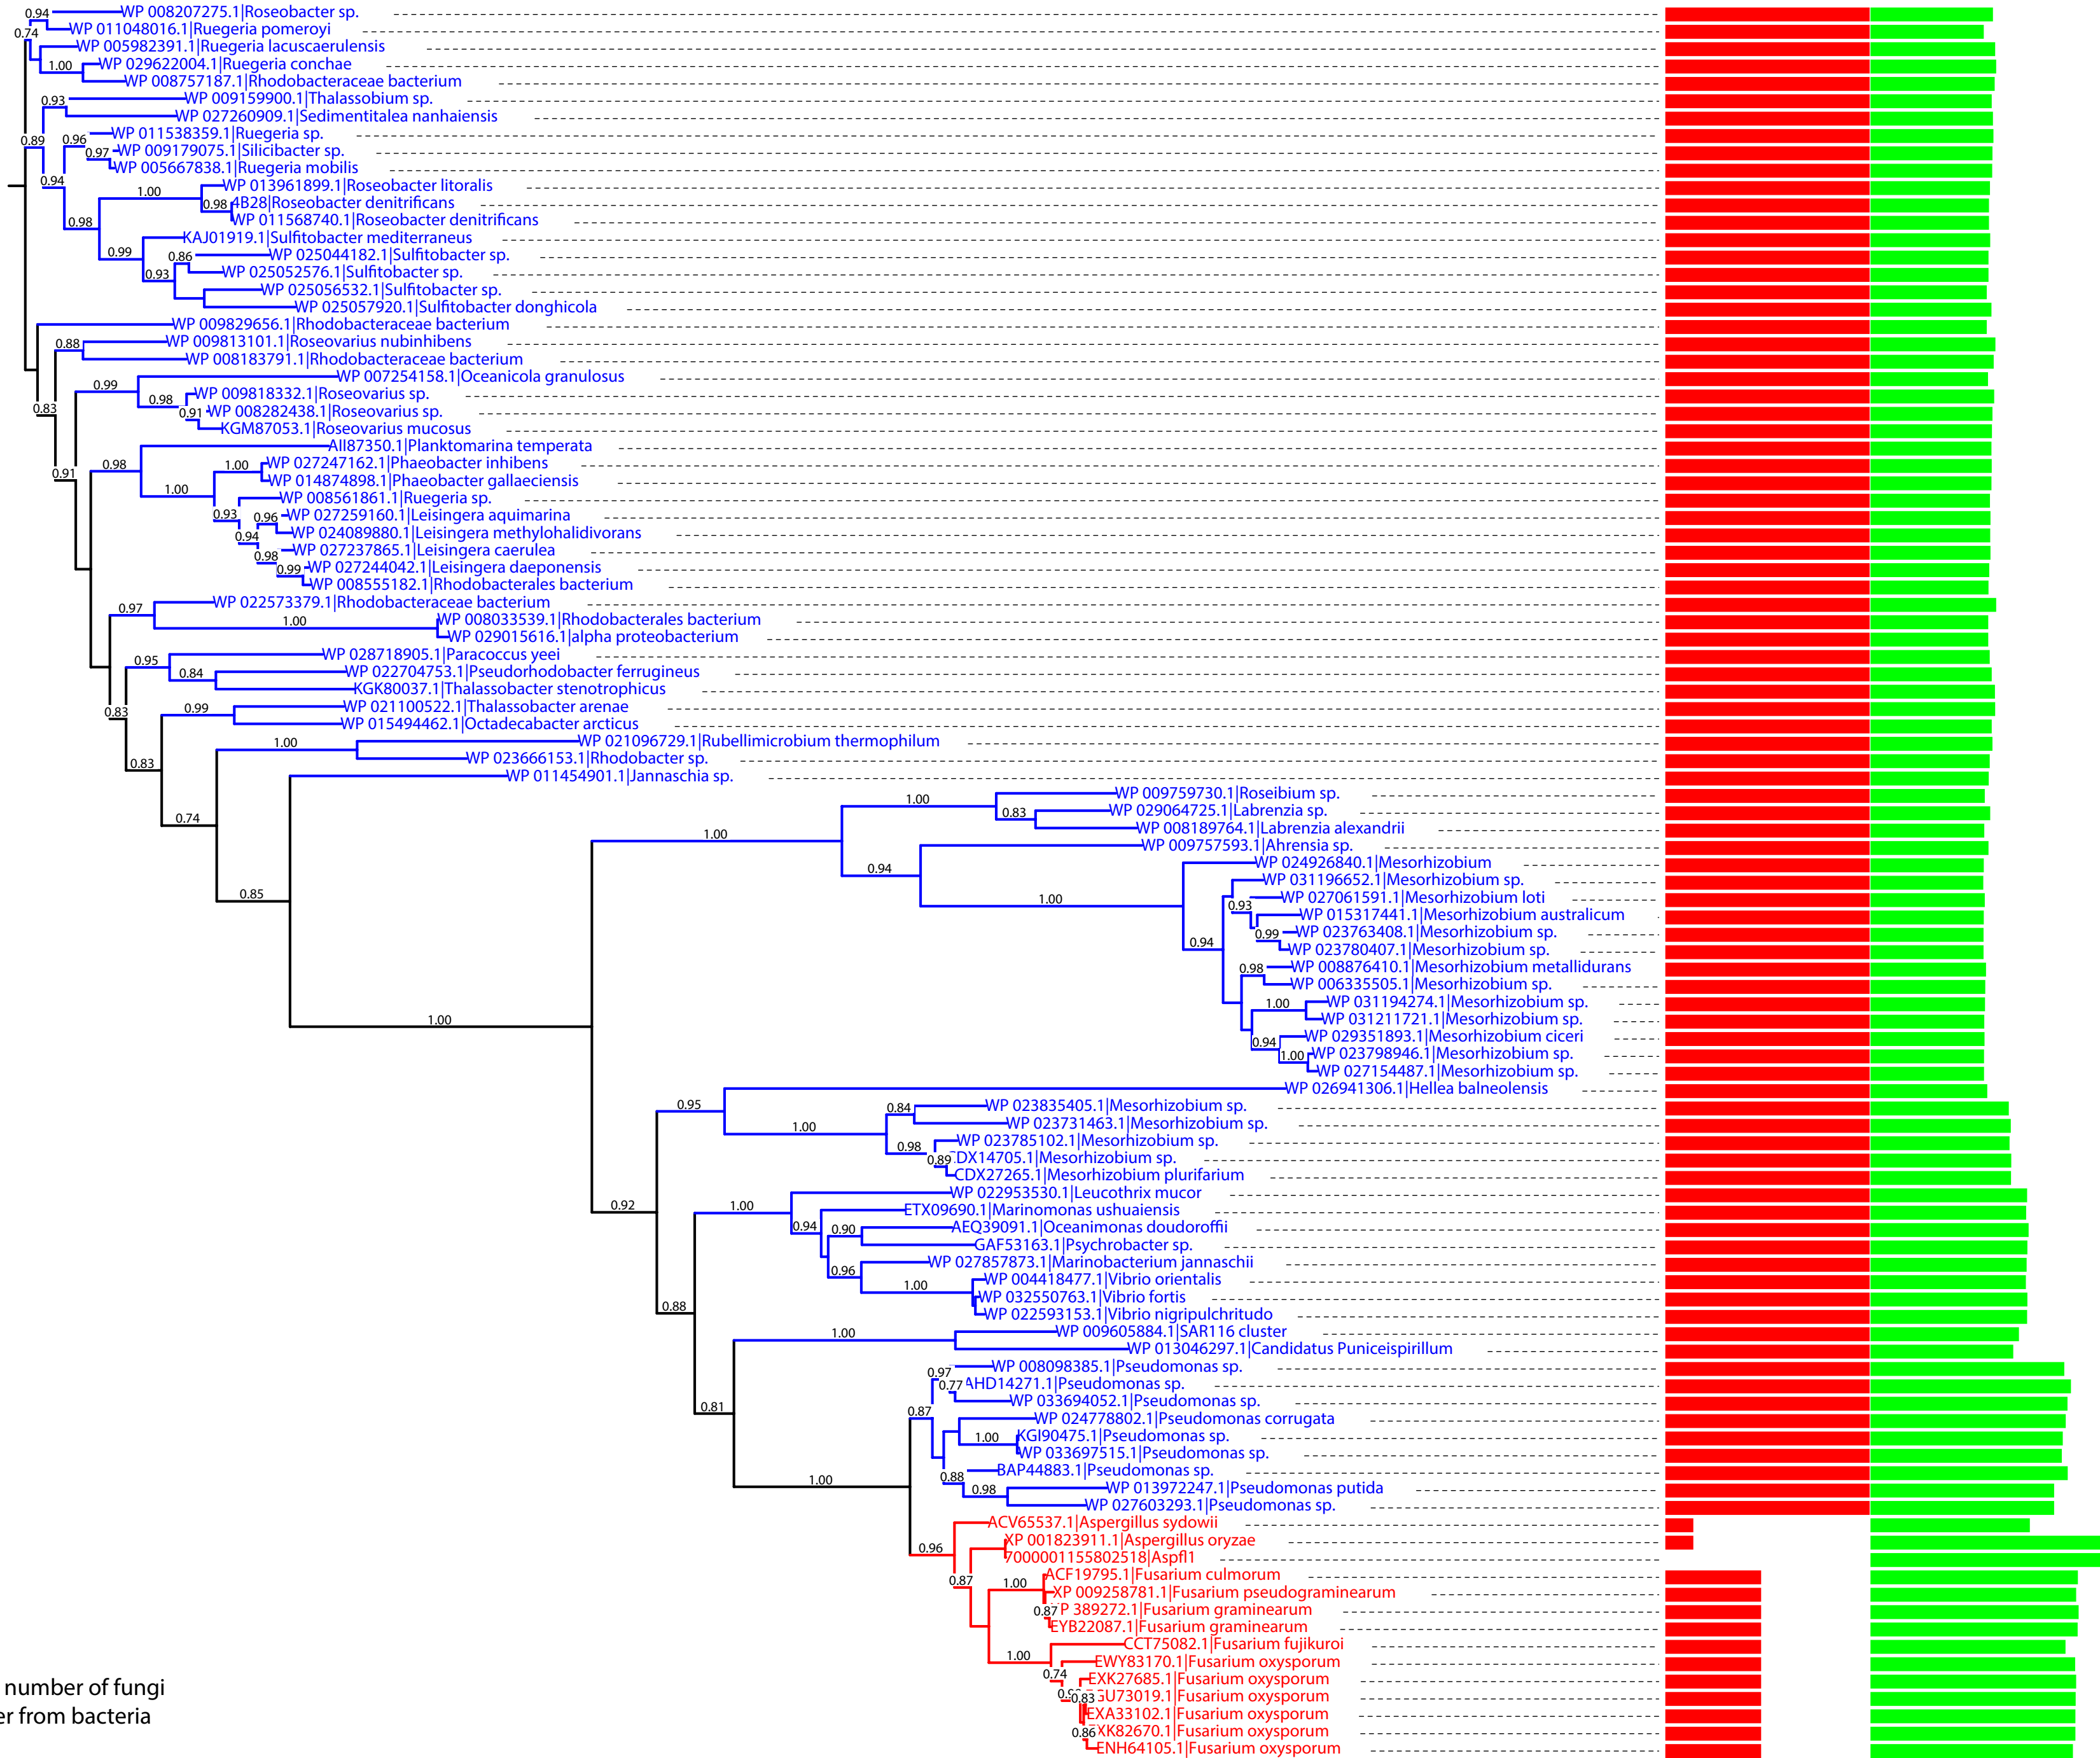

red: fungi  
blue: bacteria  
found in small number of fungi  
ancient transfer from bacteria

0.1

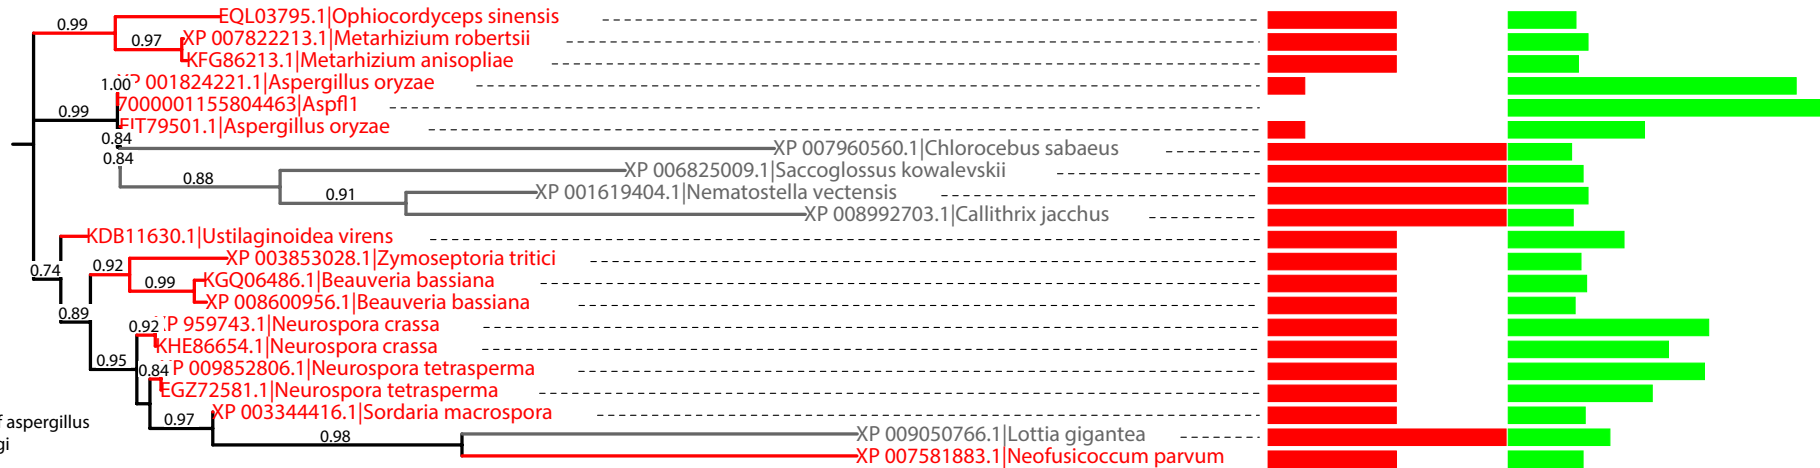

red: fungi

blue: bacteria

grey: others

found in small number of aspergillus  
transfer from distant fungi

red: fungi

transfer from distant fungi

0.1

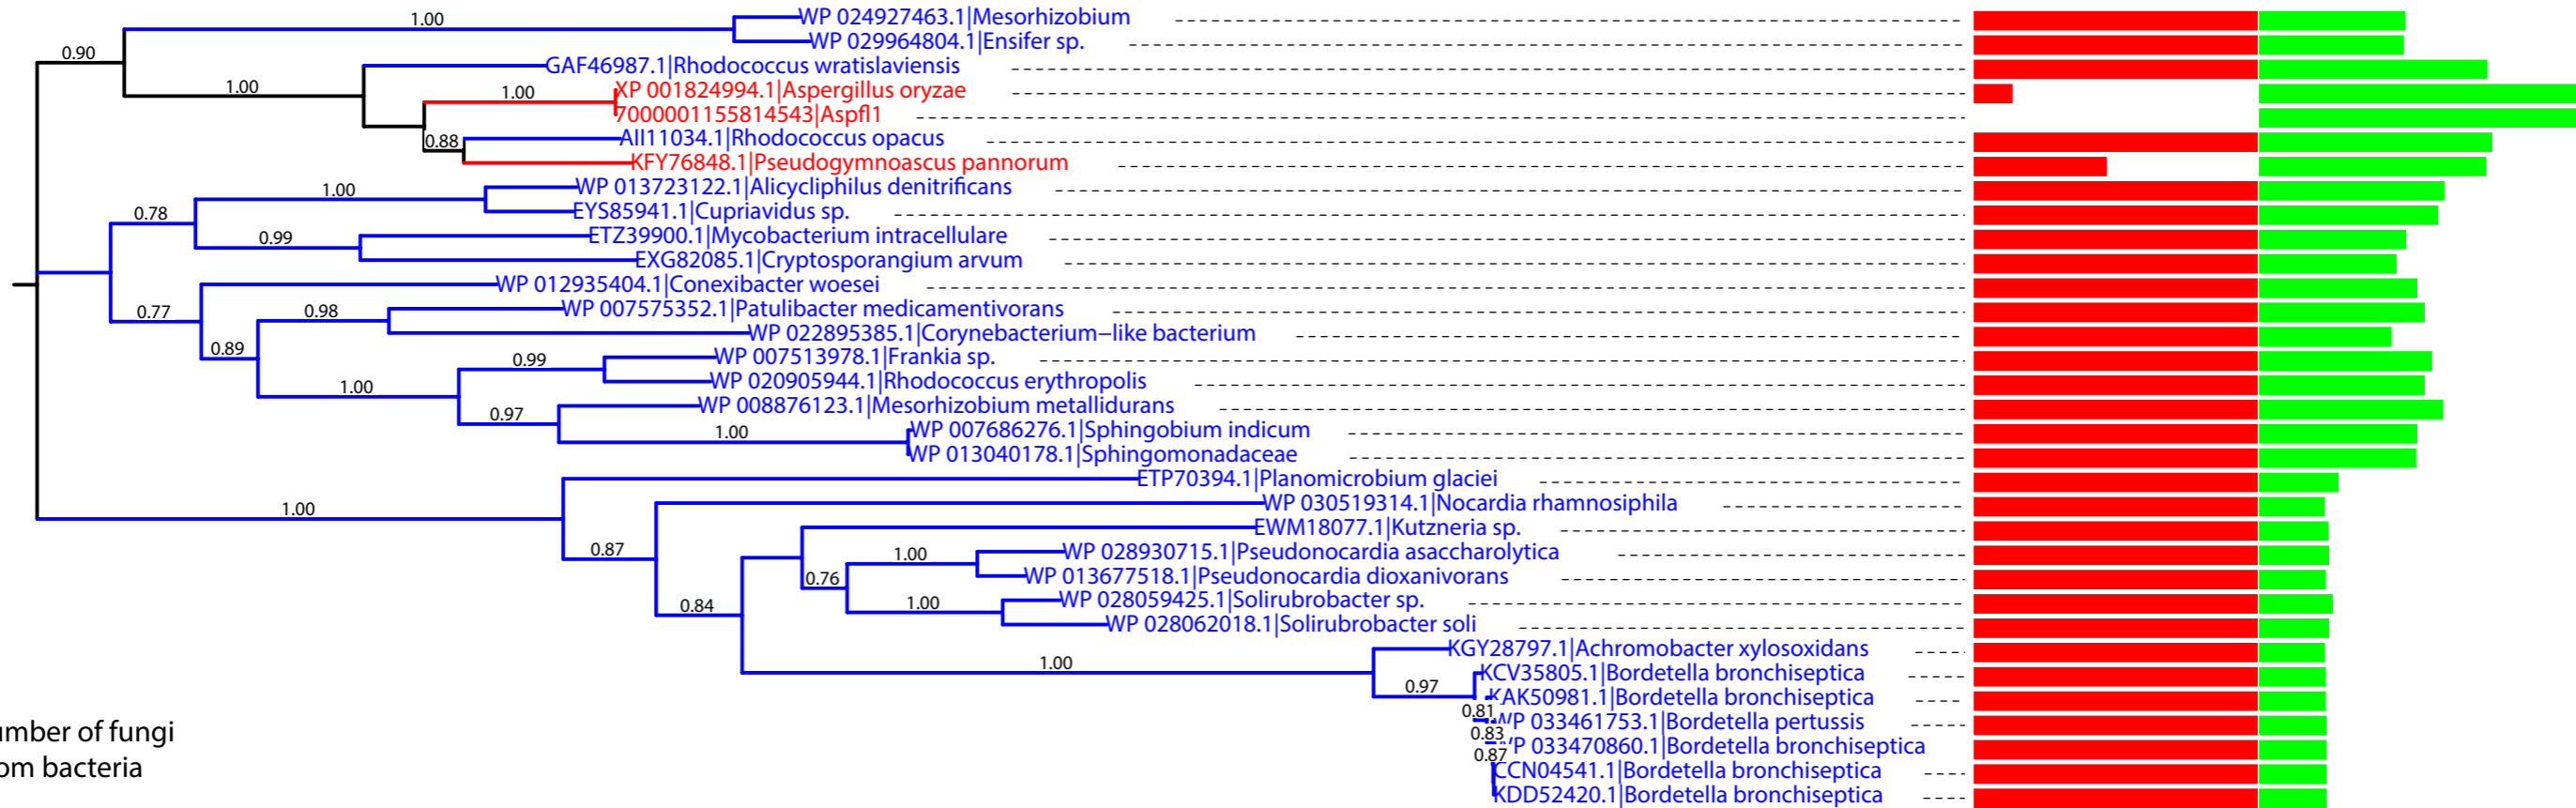

0.1

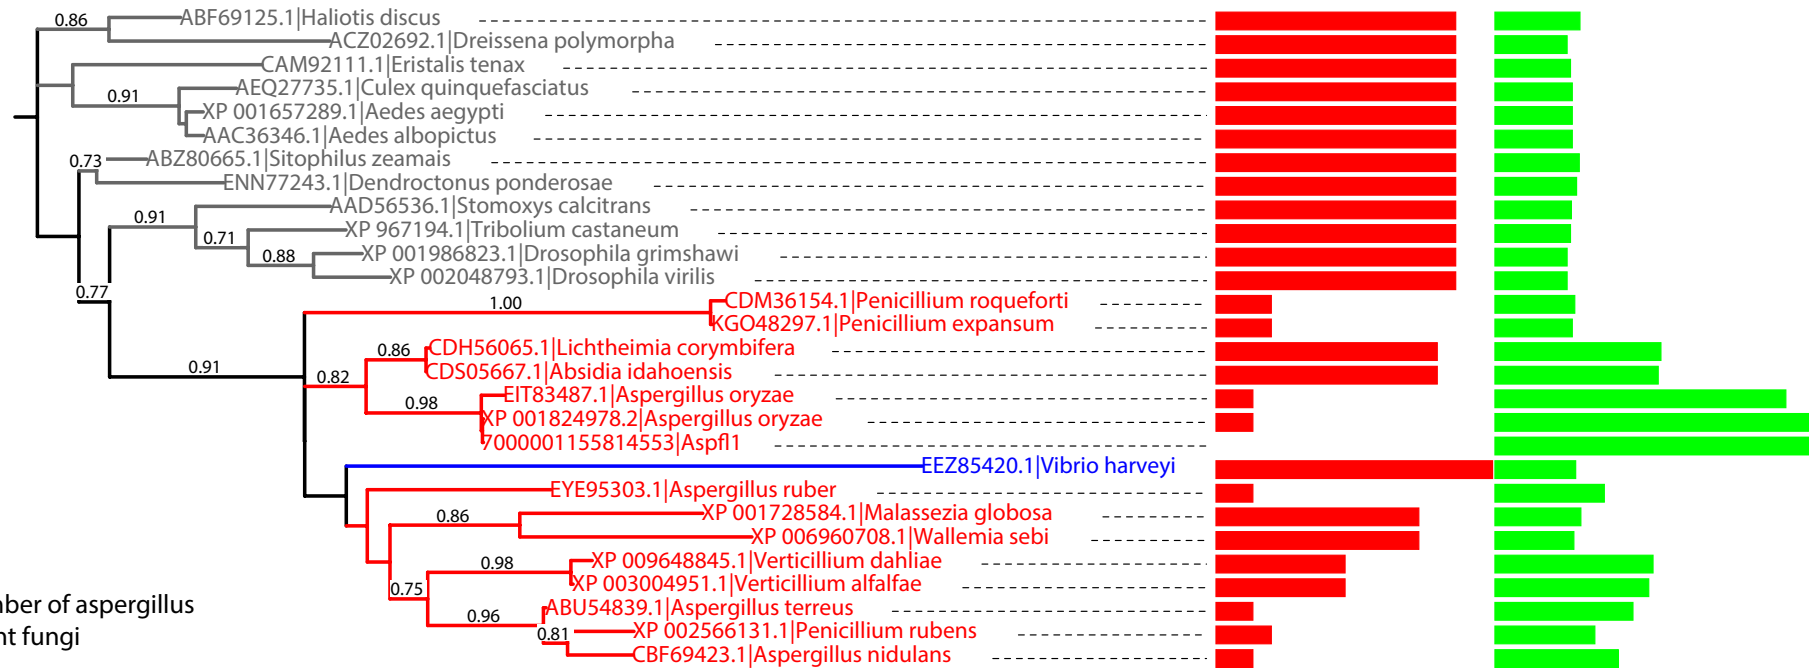

red: fungi

blue: bacteria

grey: others

found in small number of aspergillus  
transfer from distant fungi

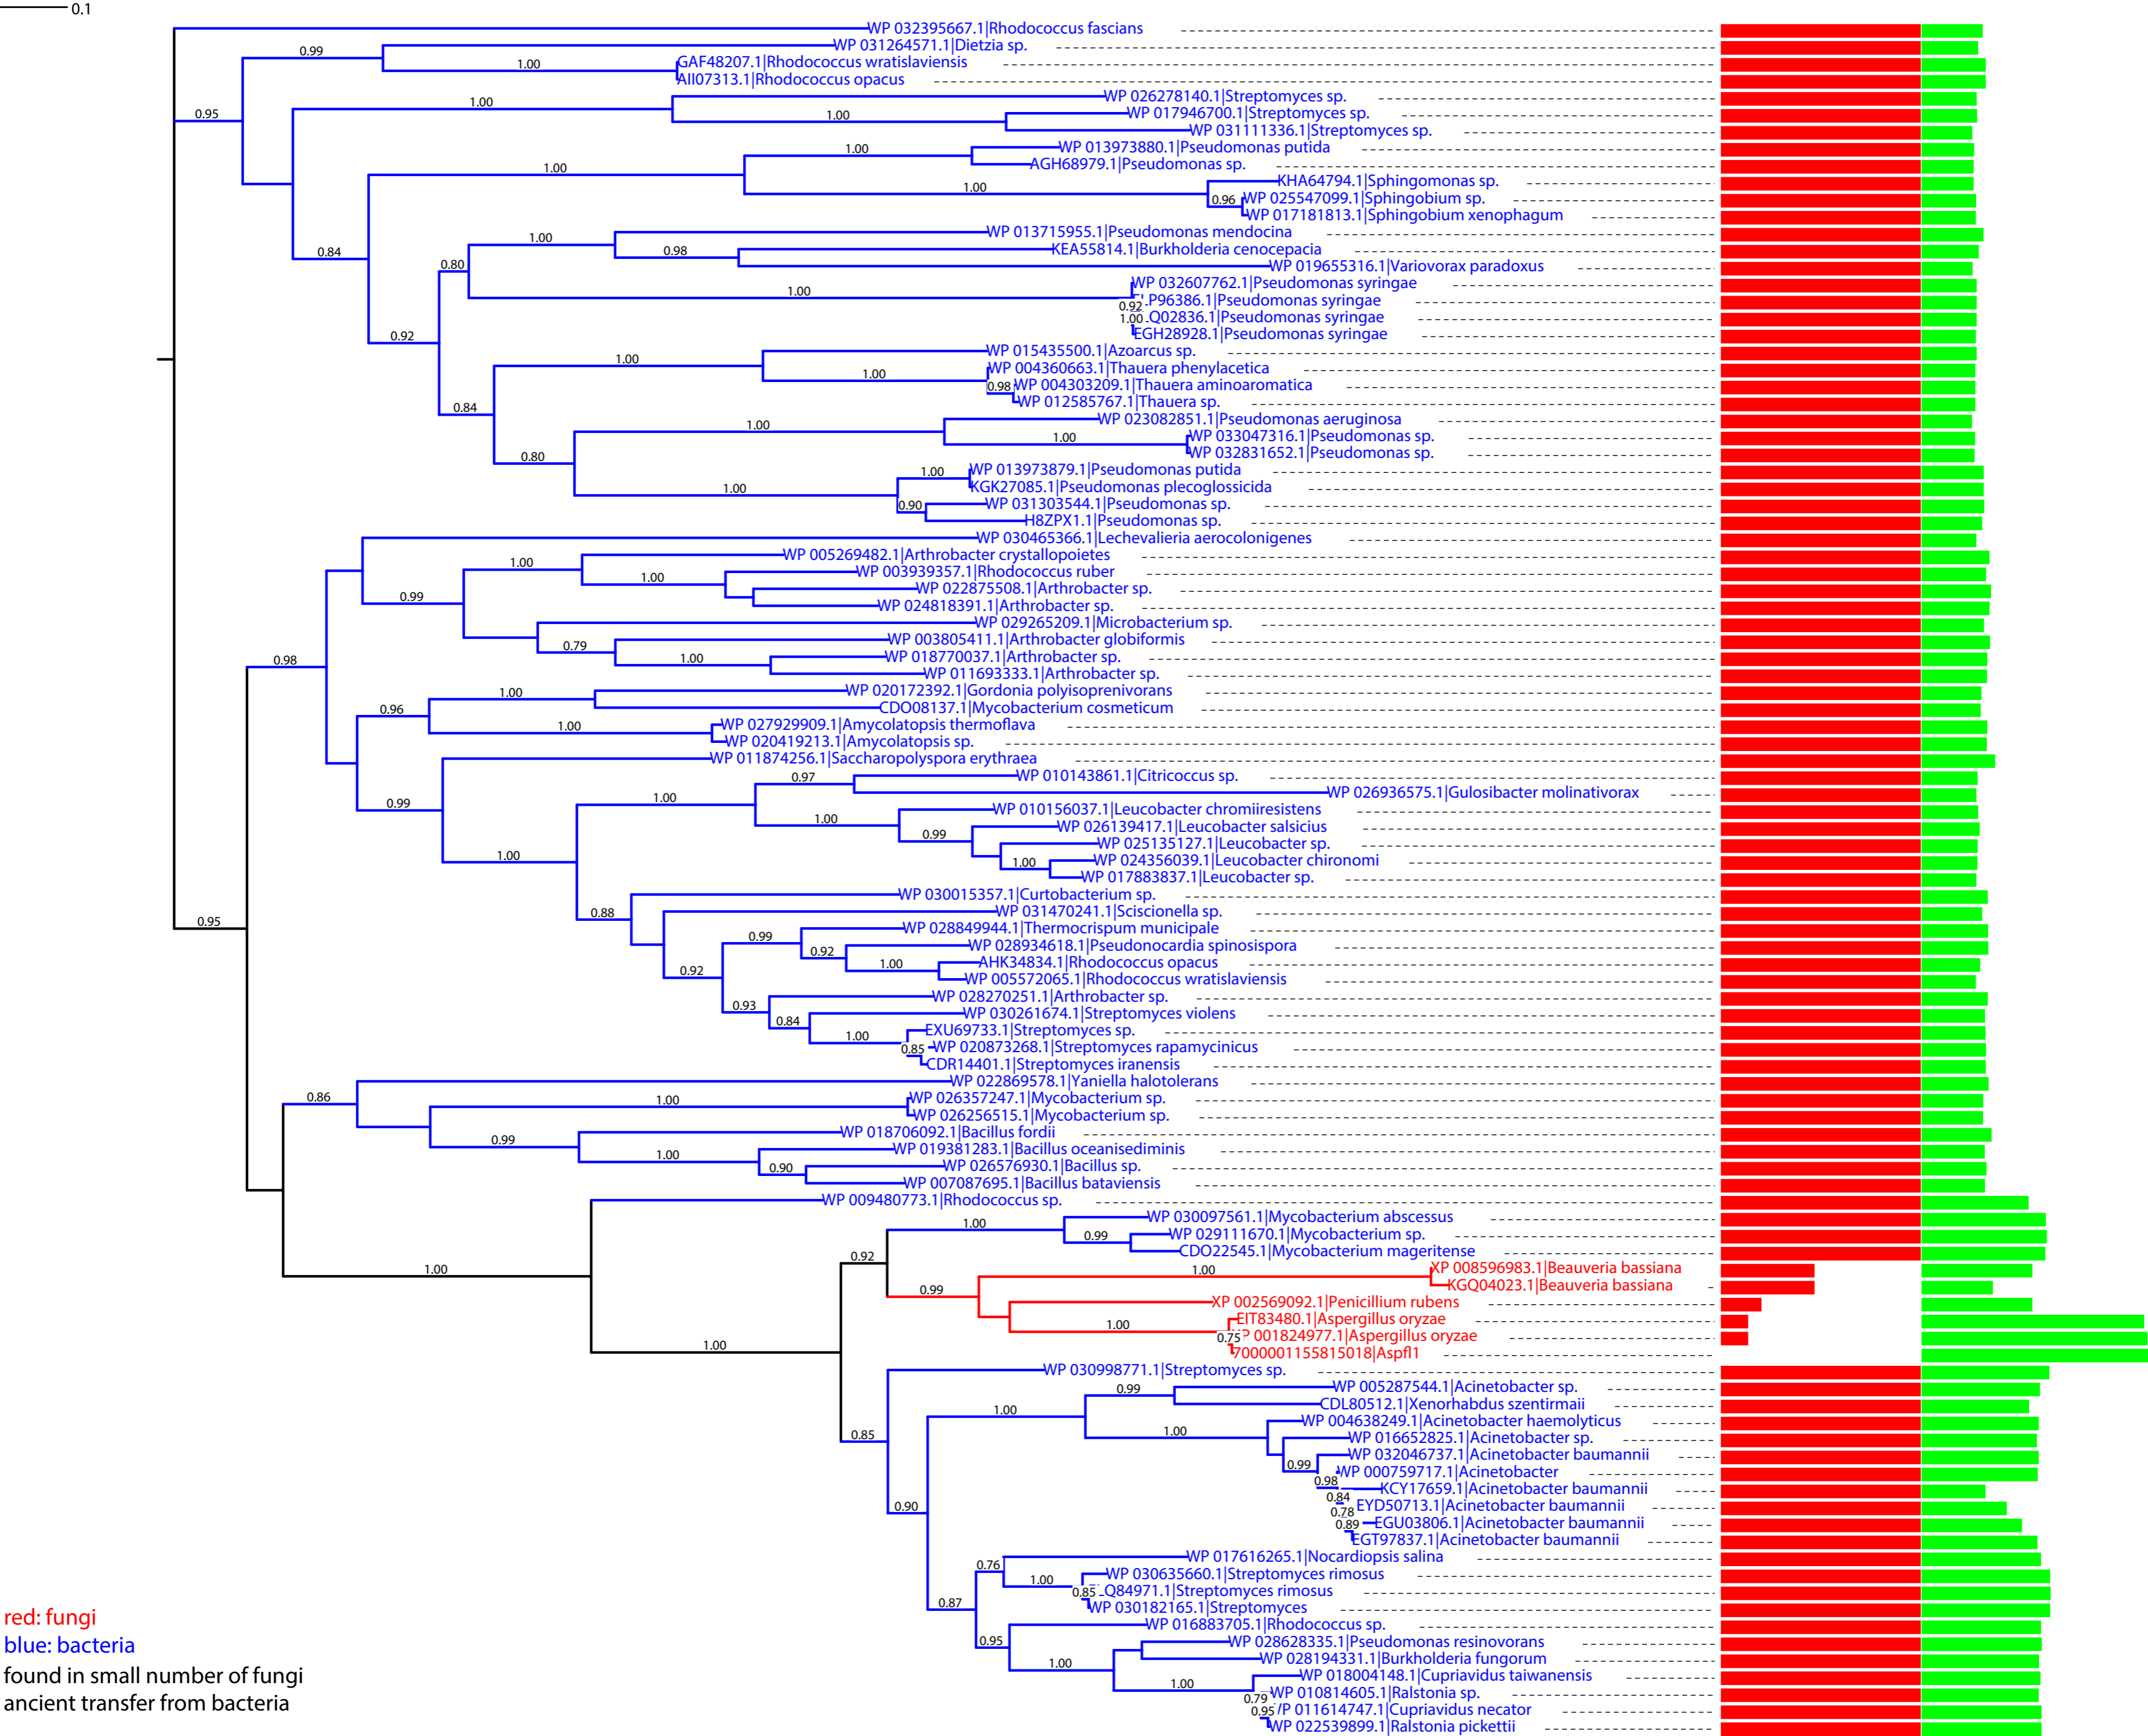

0.1

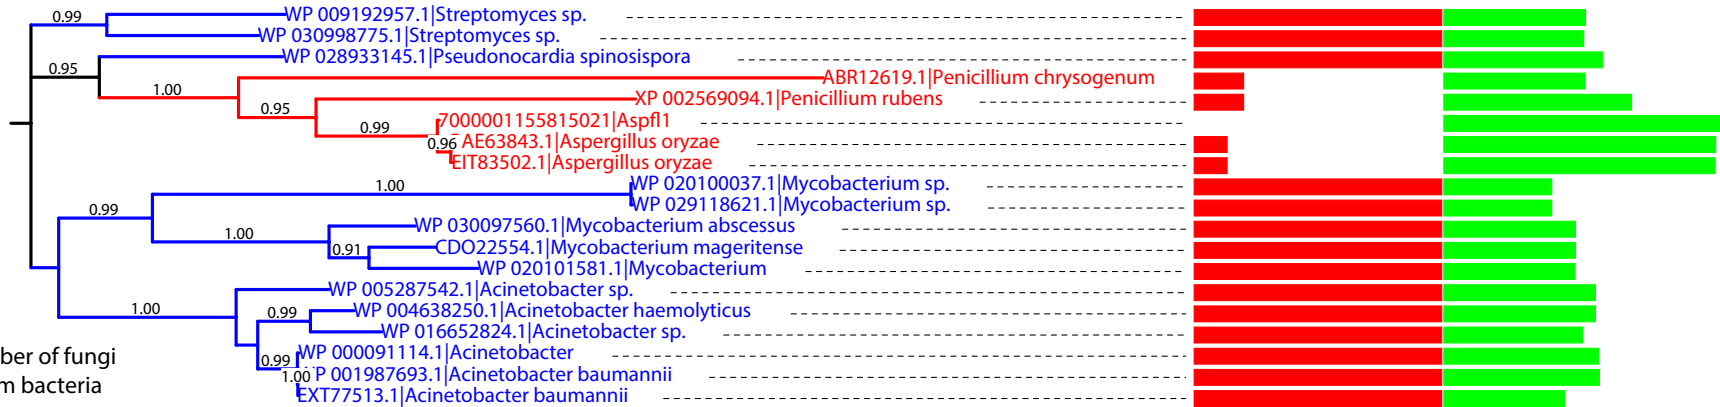

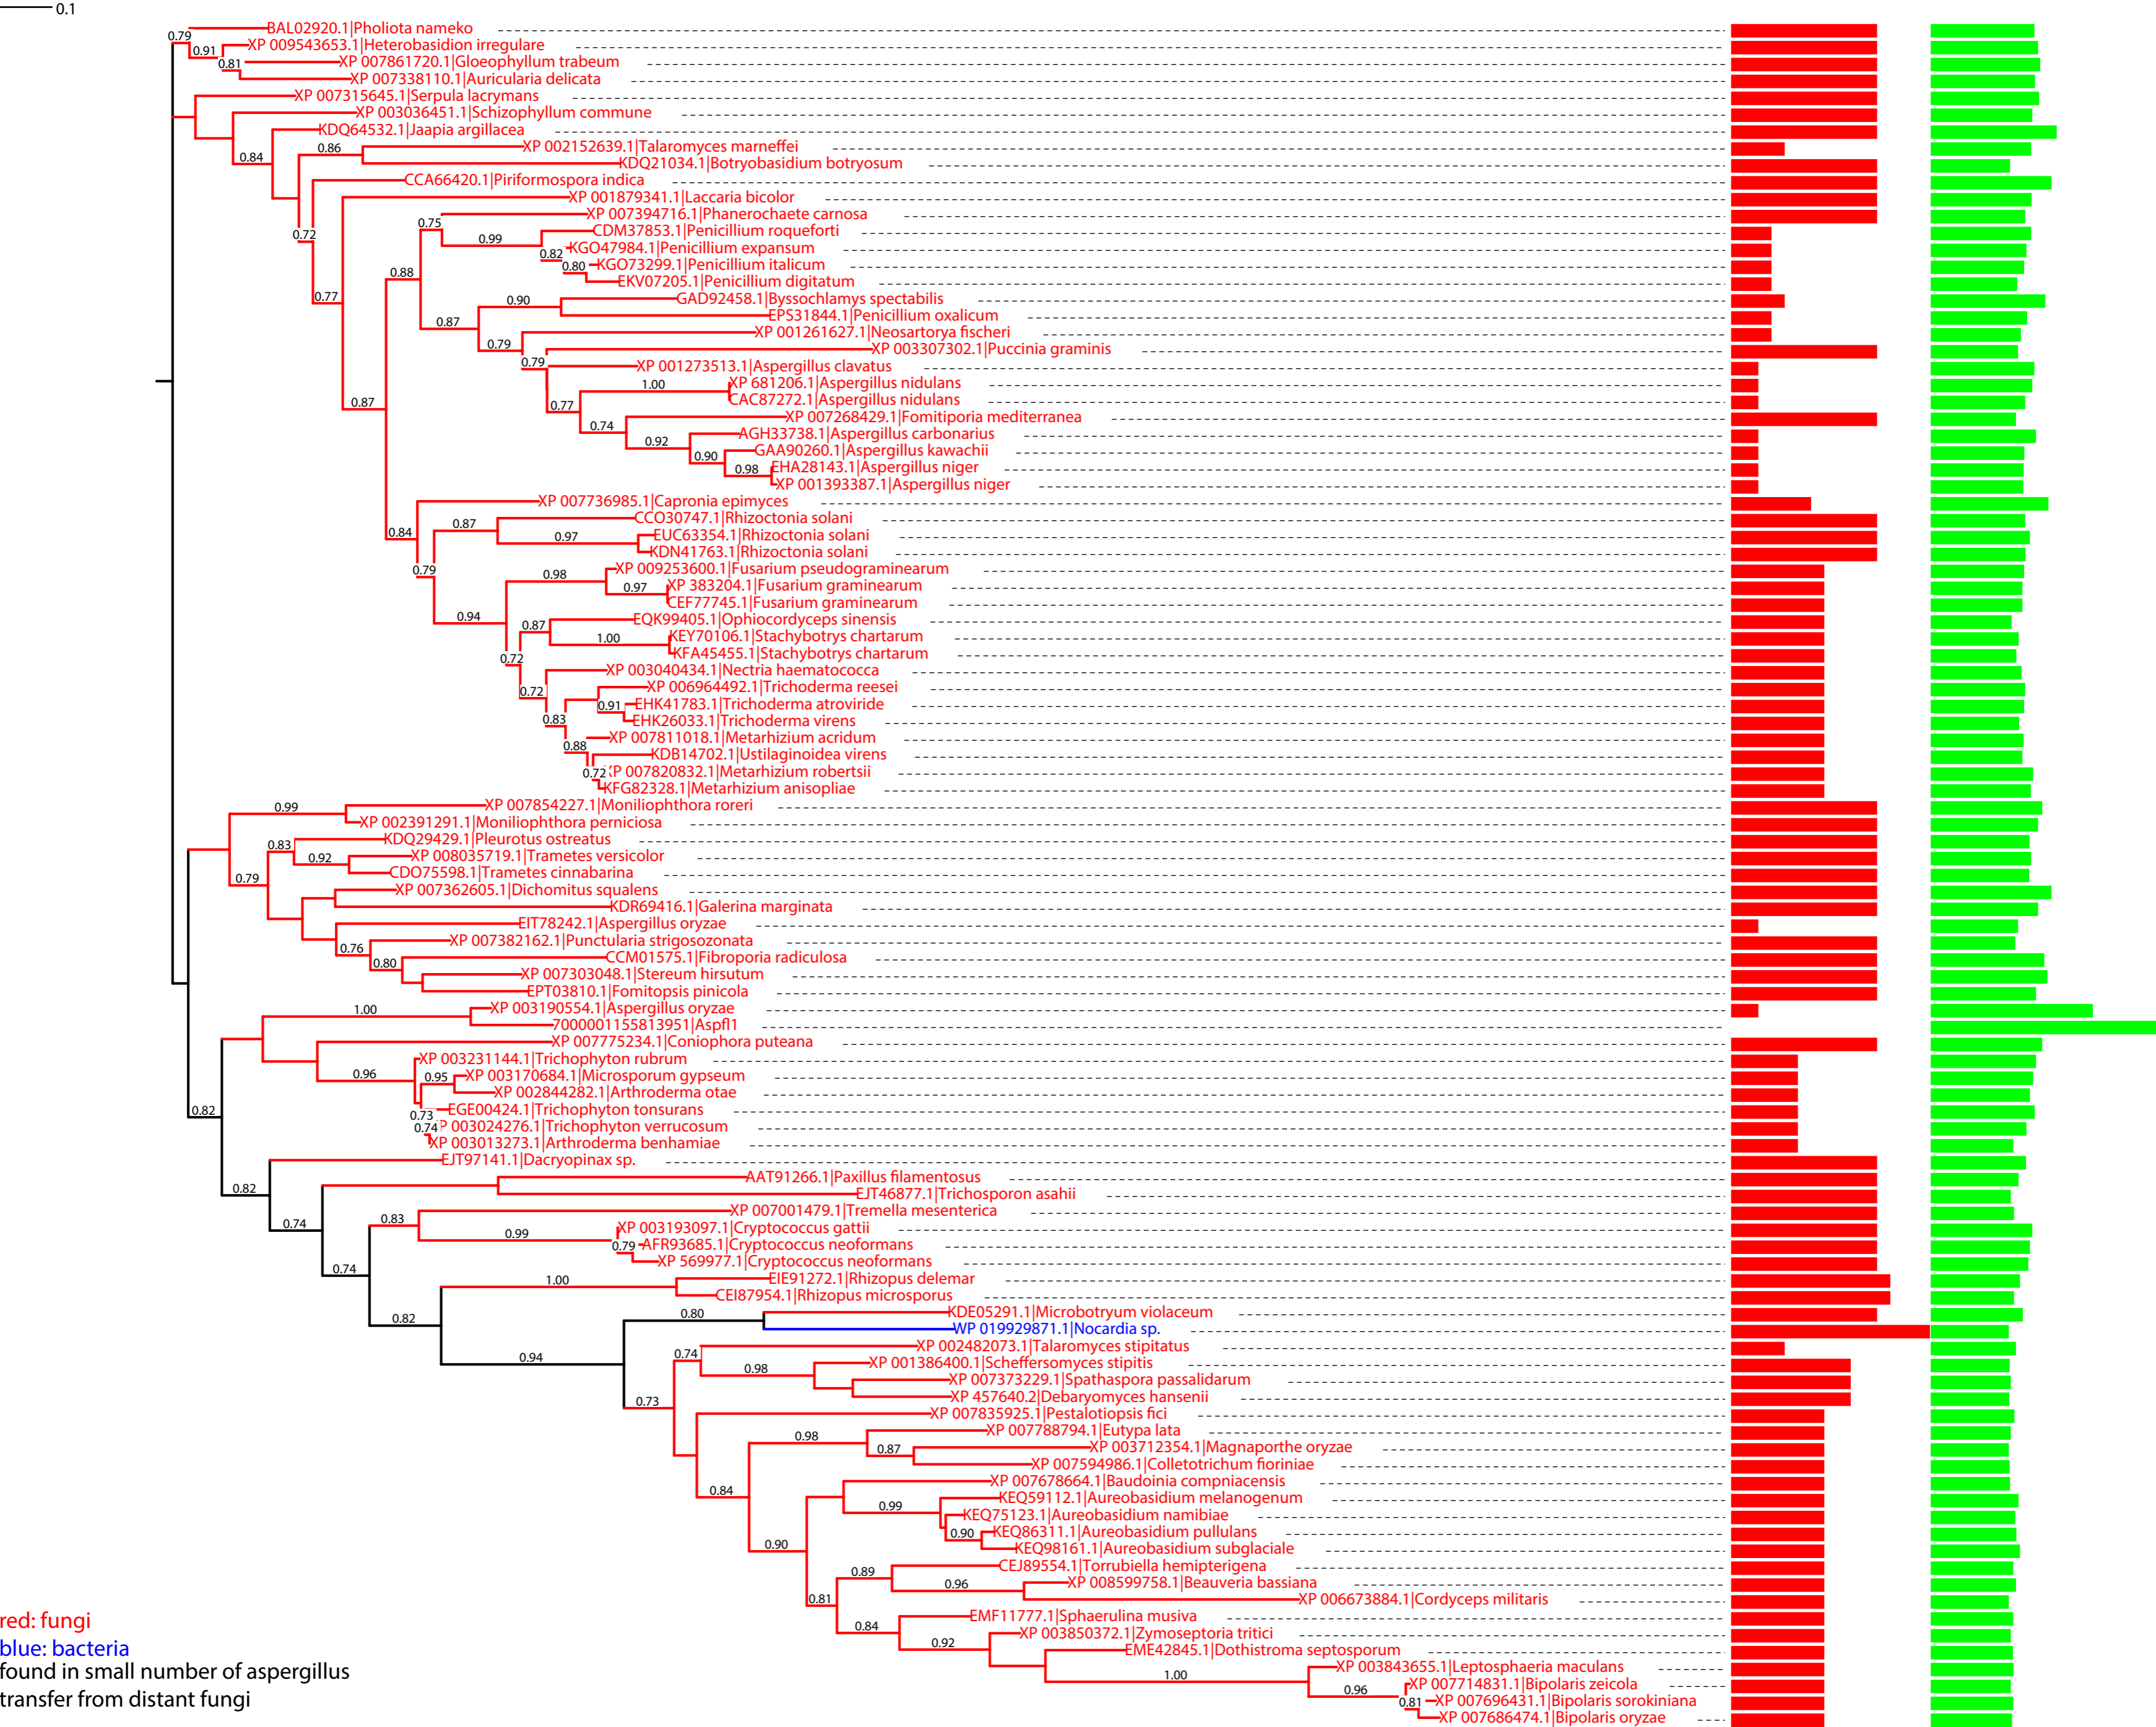

red: fungi  
found in small number of aspergillus  
transfer from distant fungi

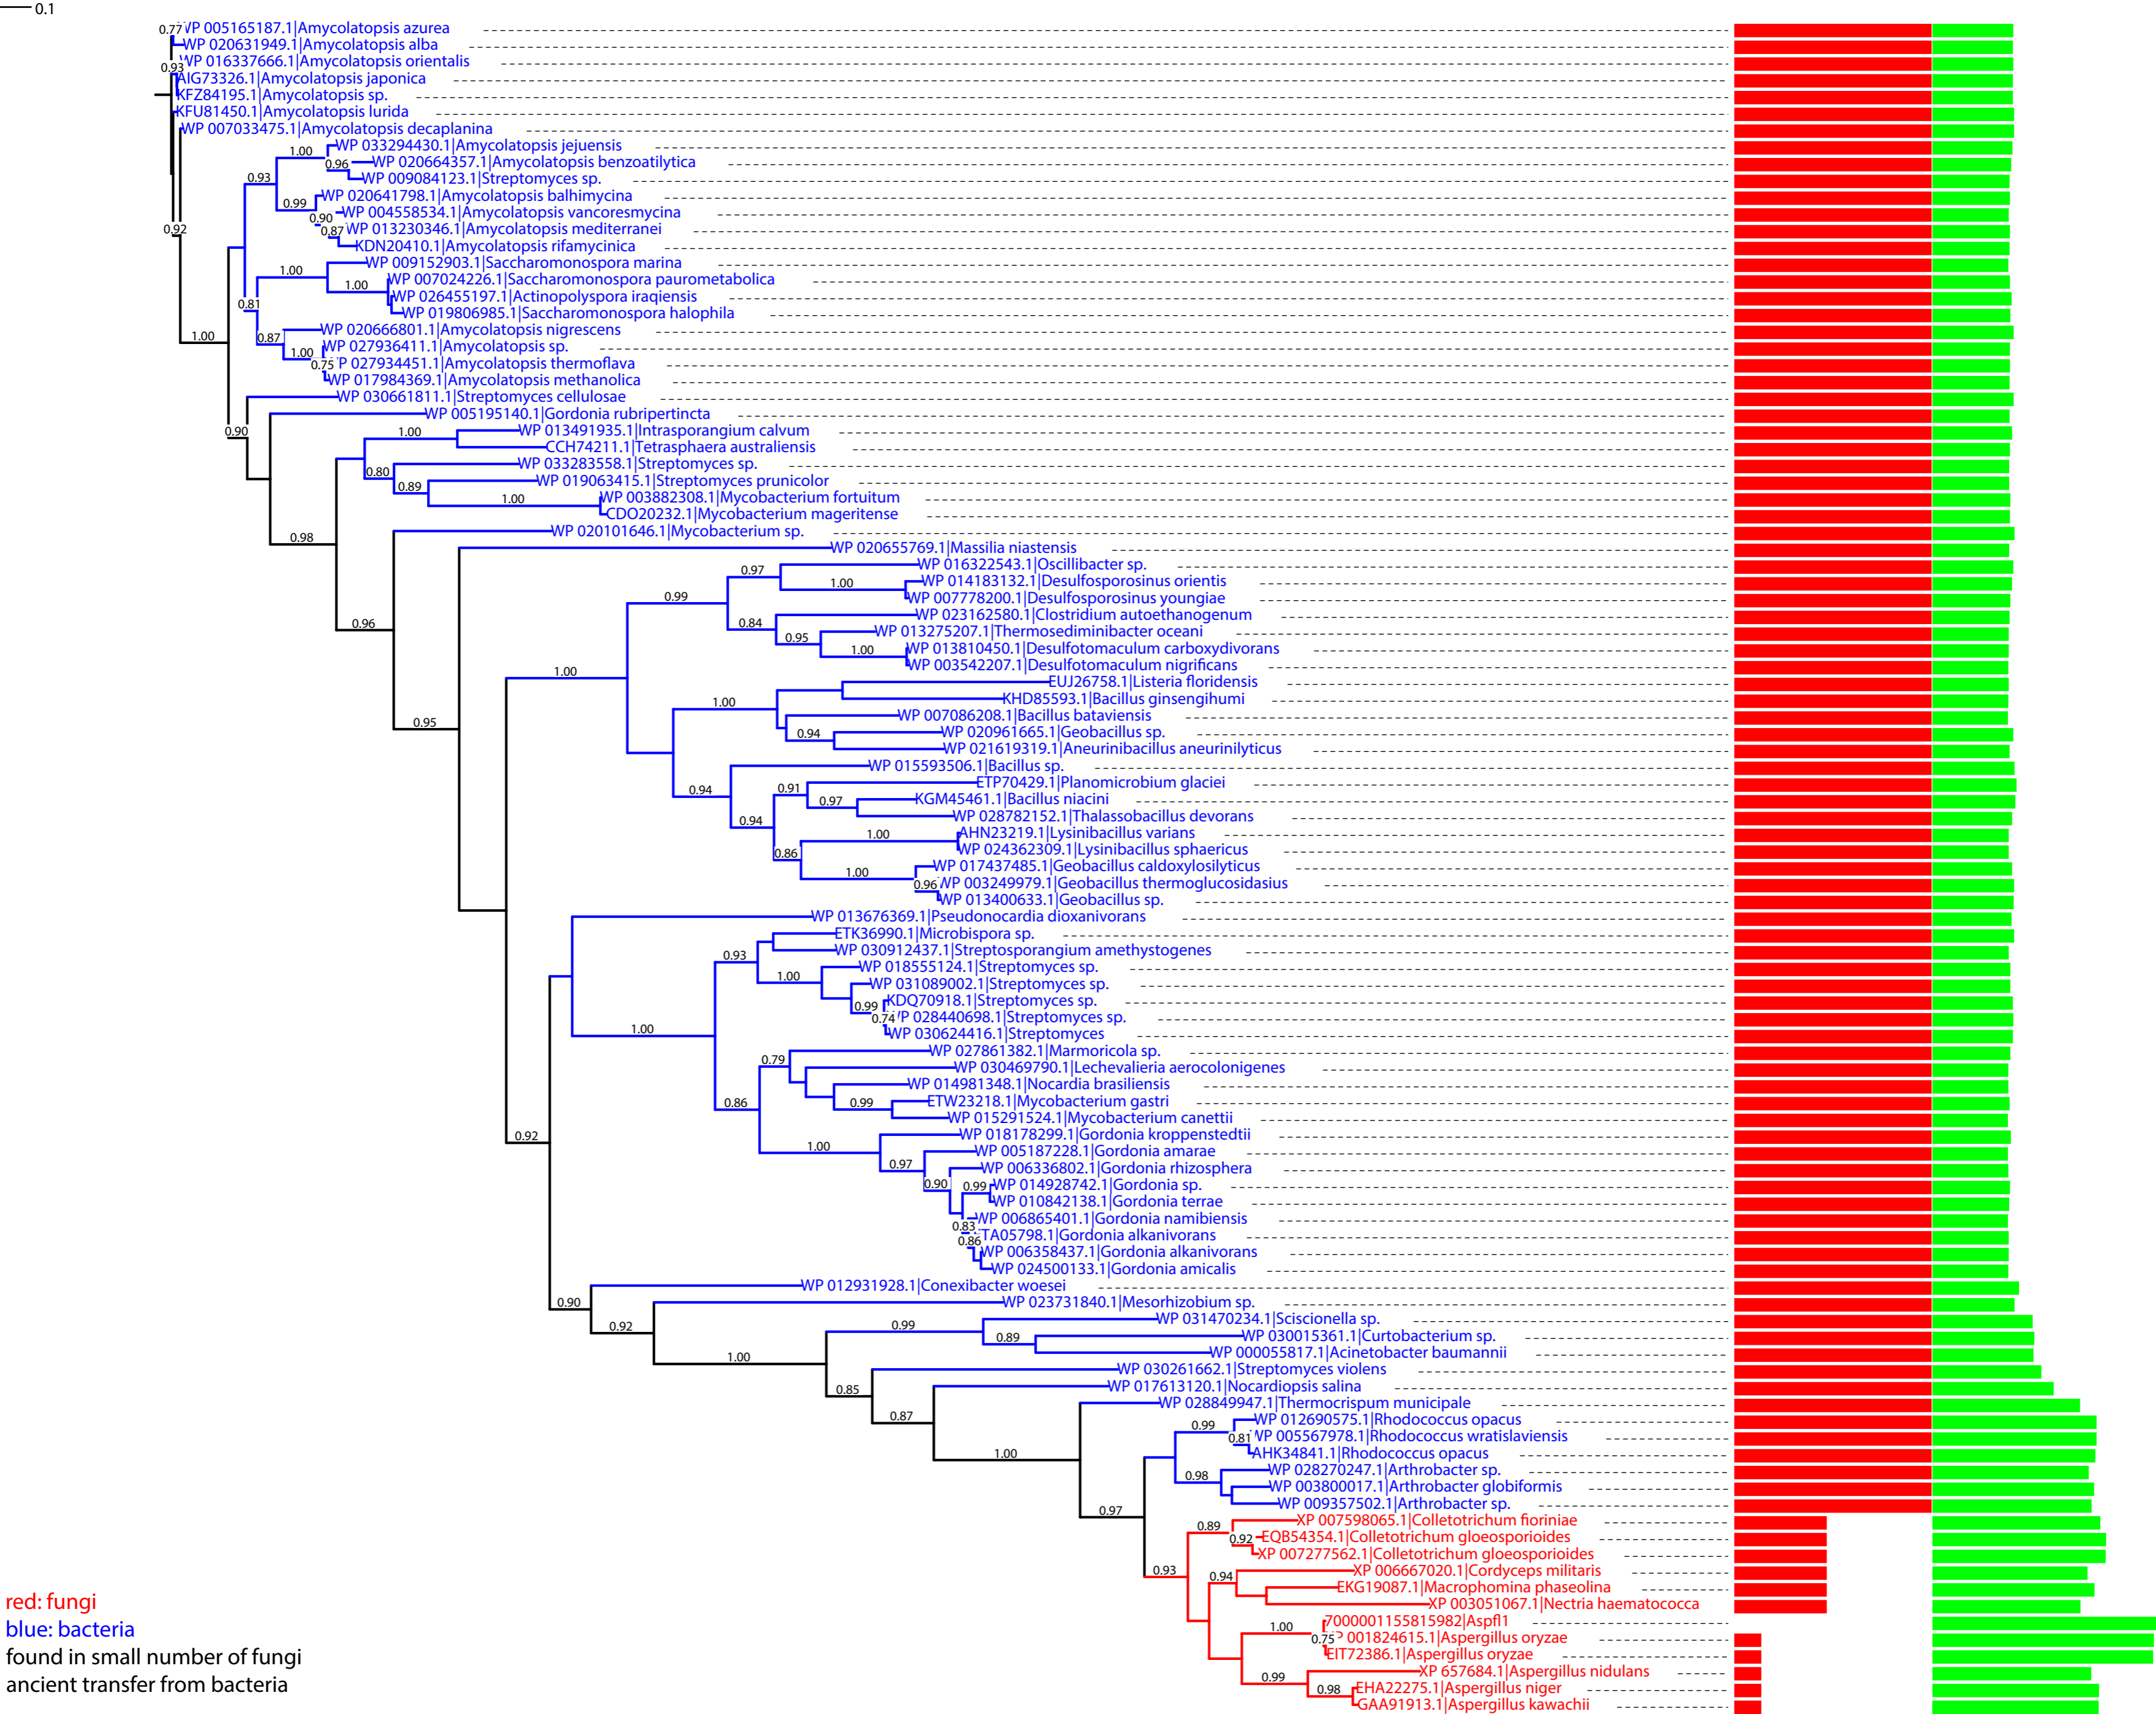

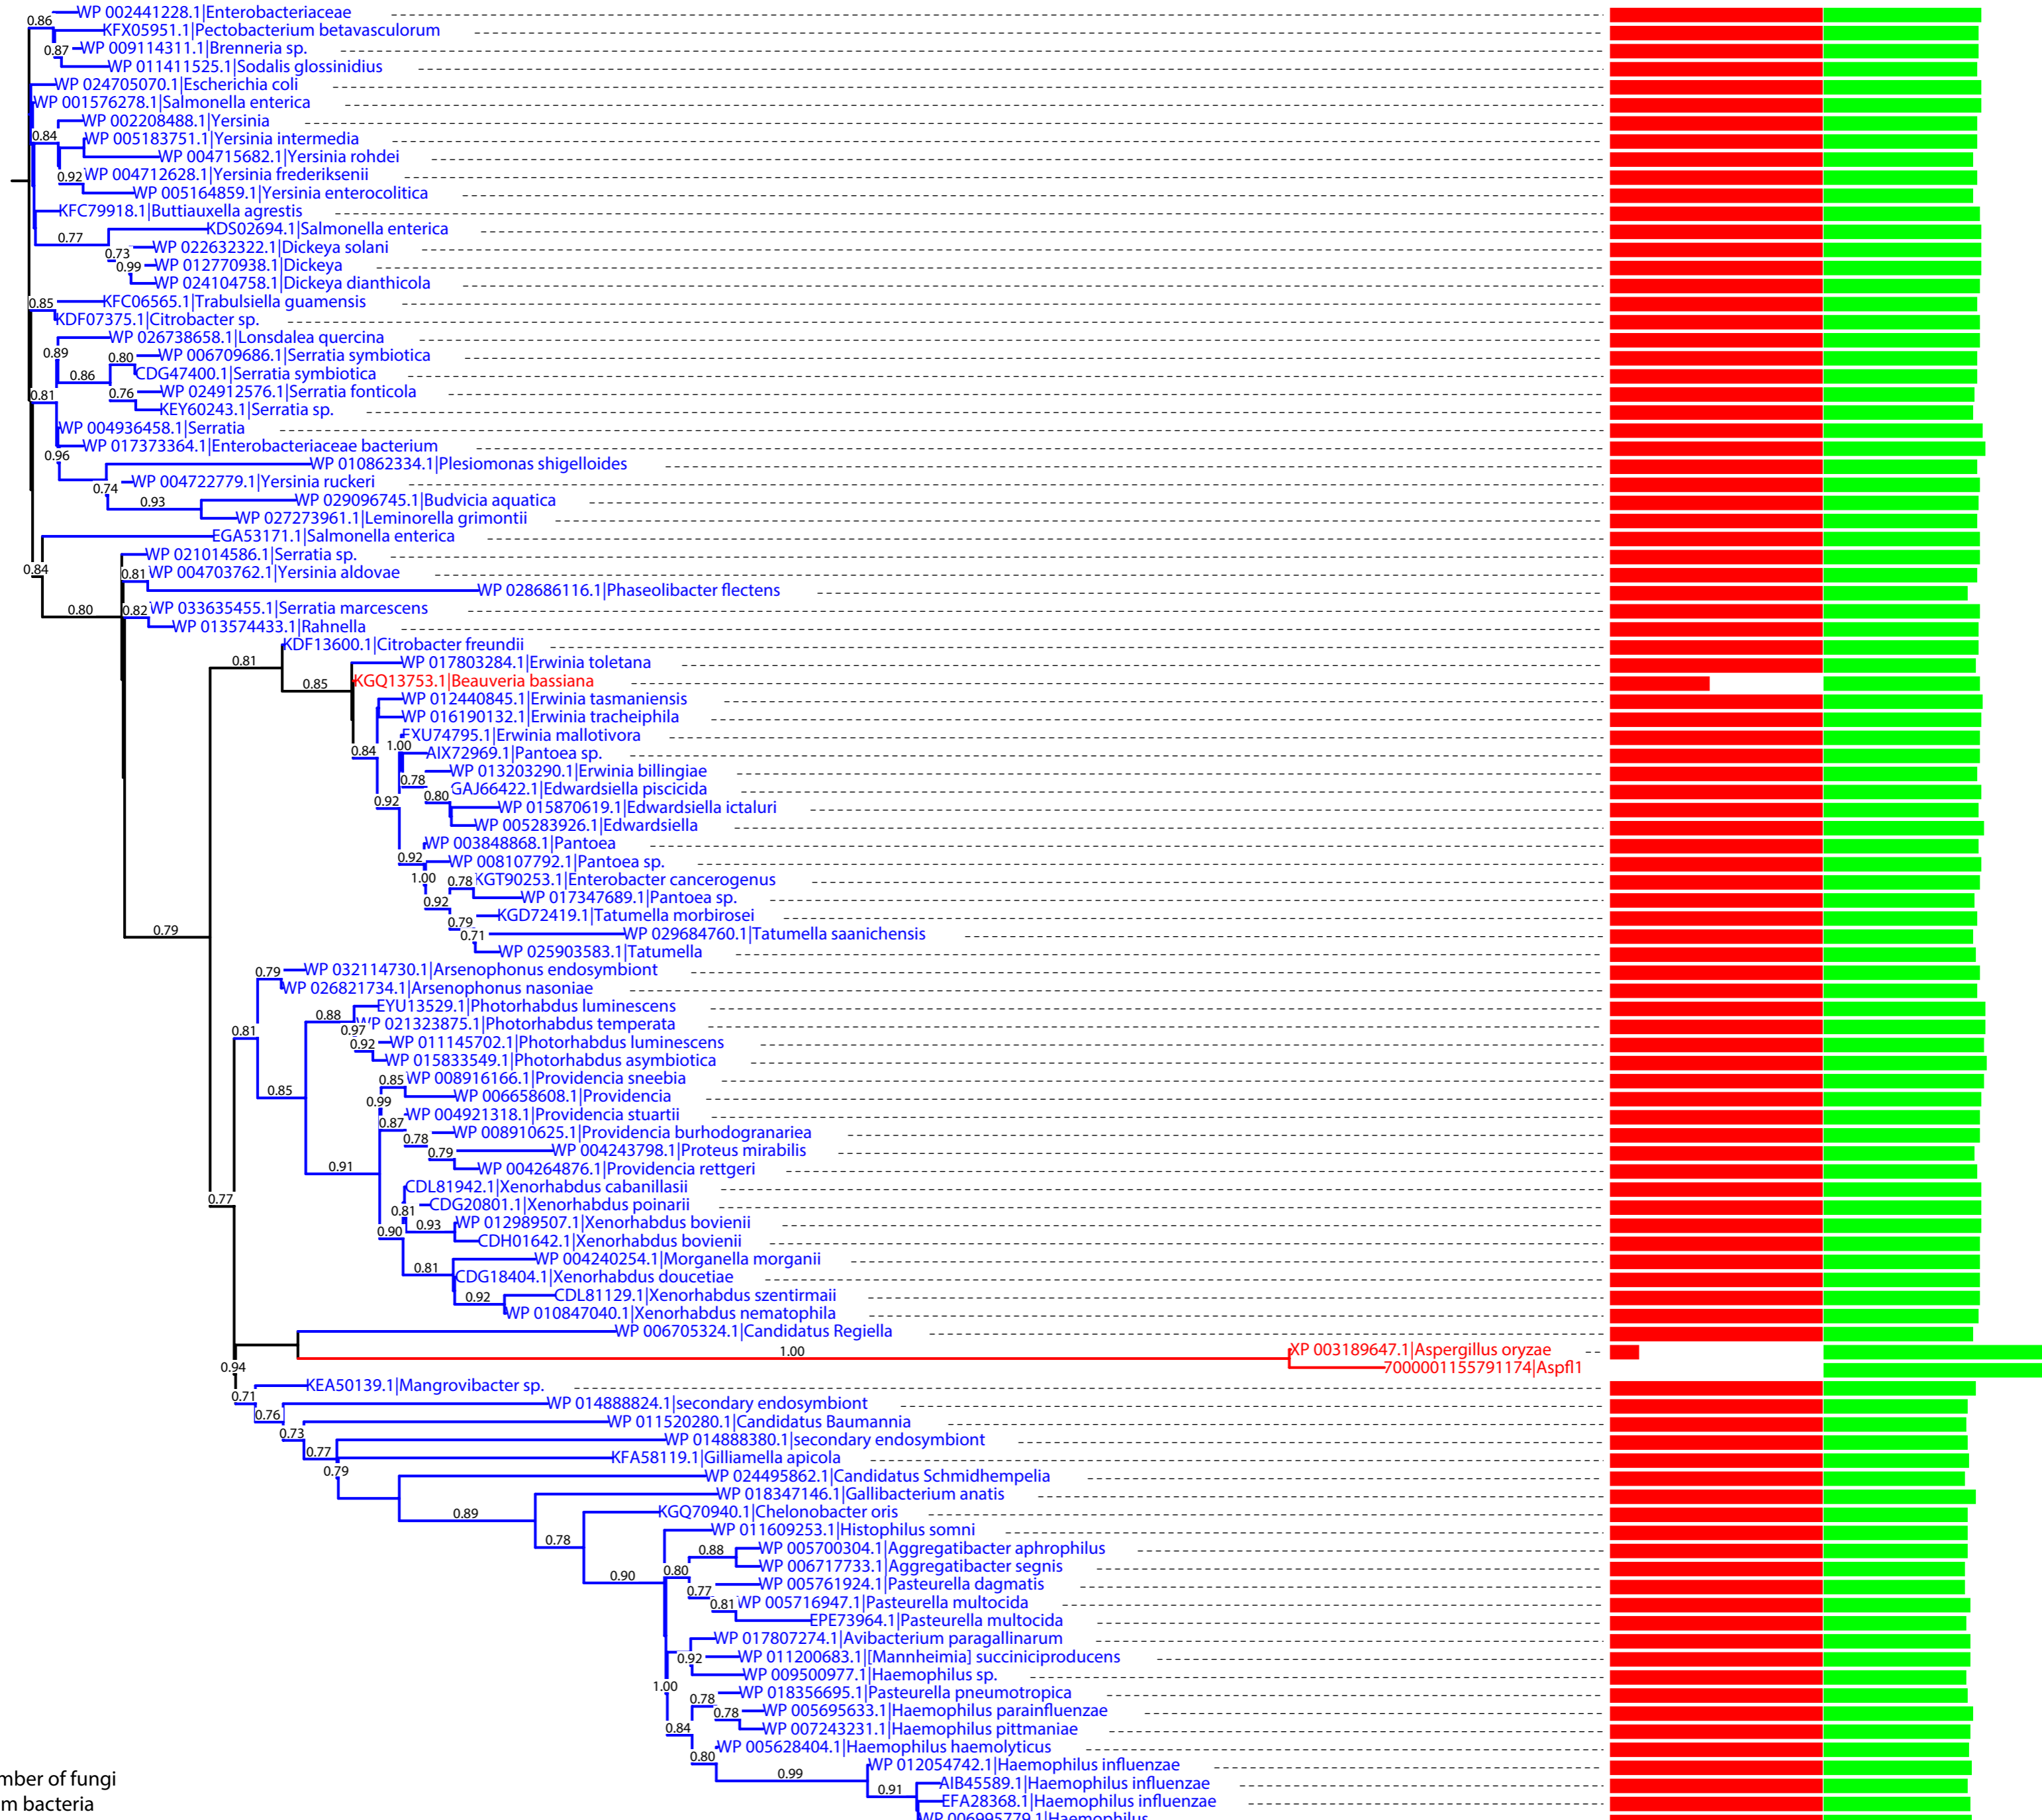

red: fungi  
blue: bacteria  
found in small number of fungi  
recent transfer from bacteria

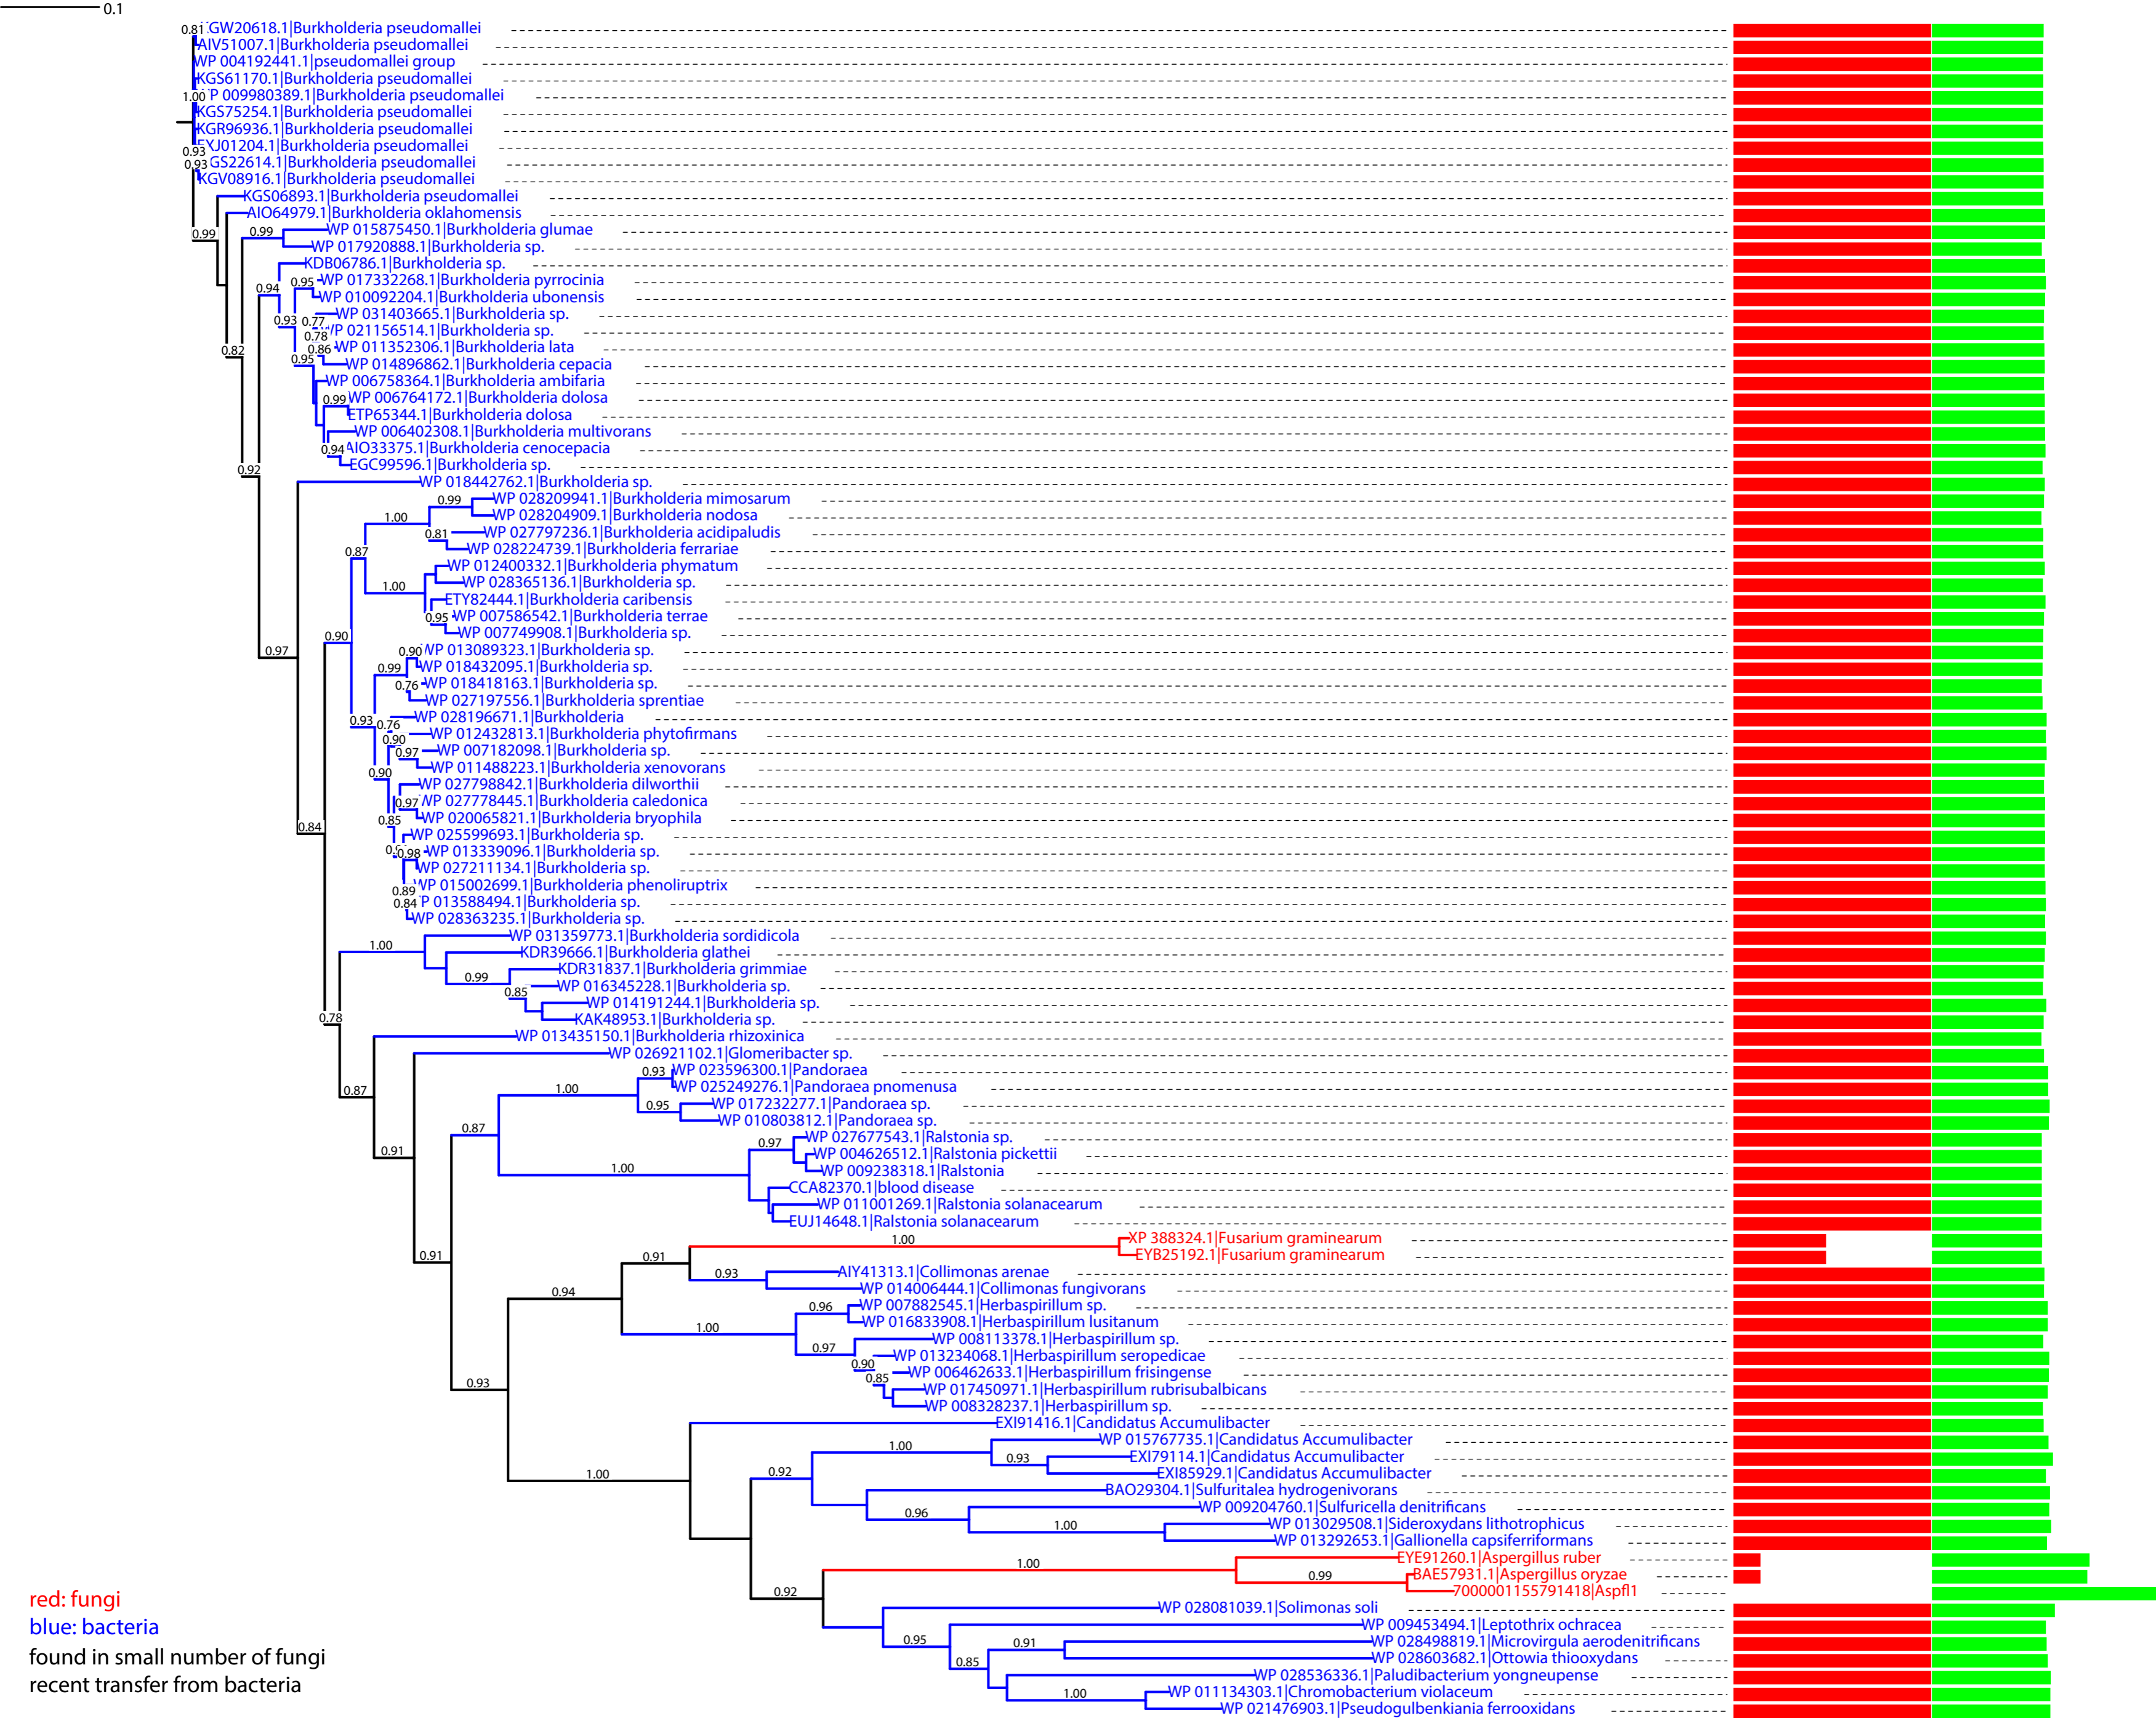

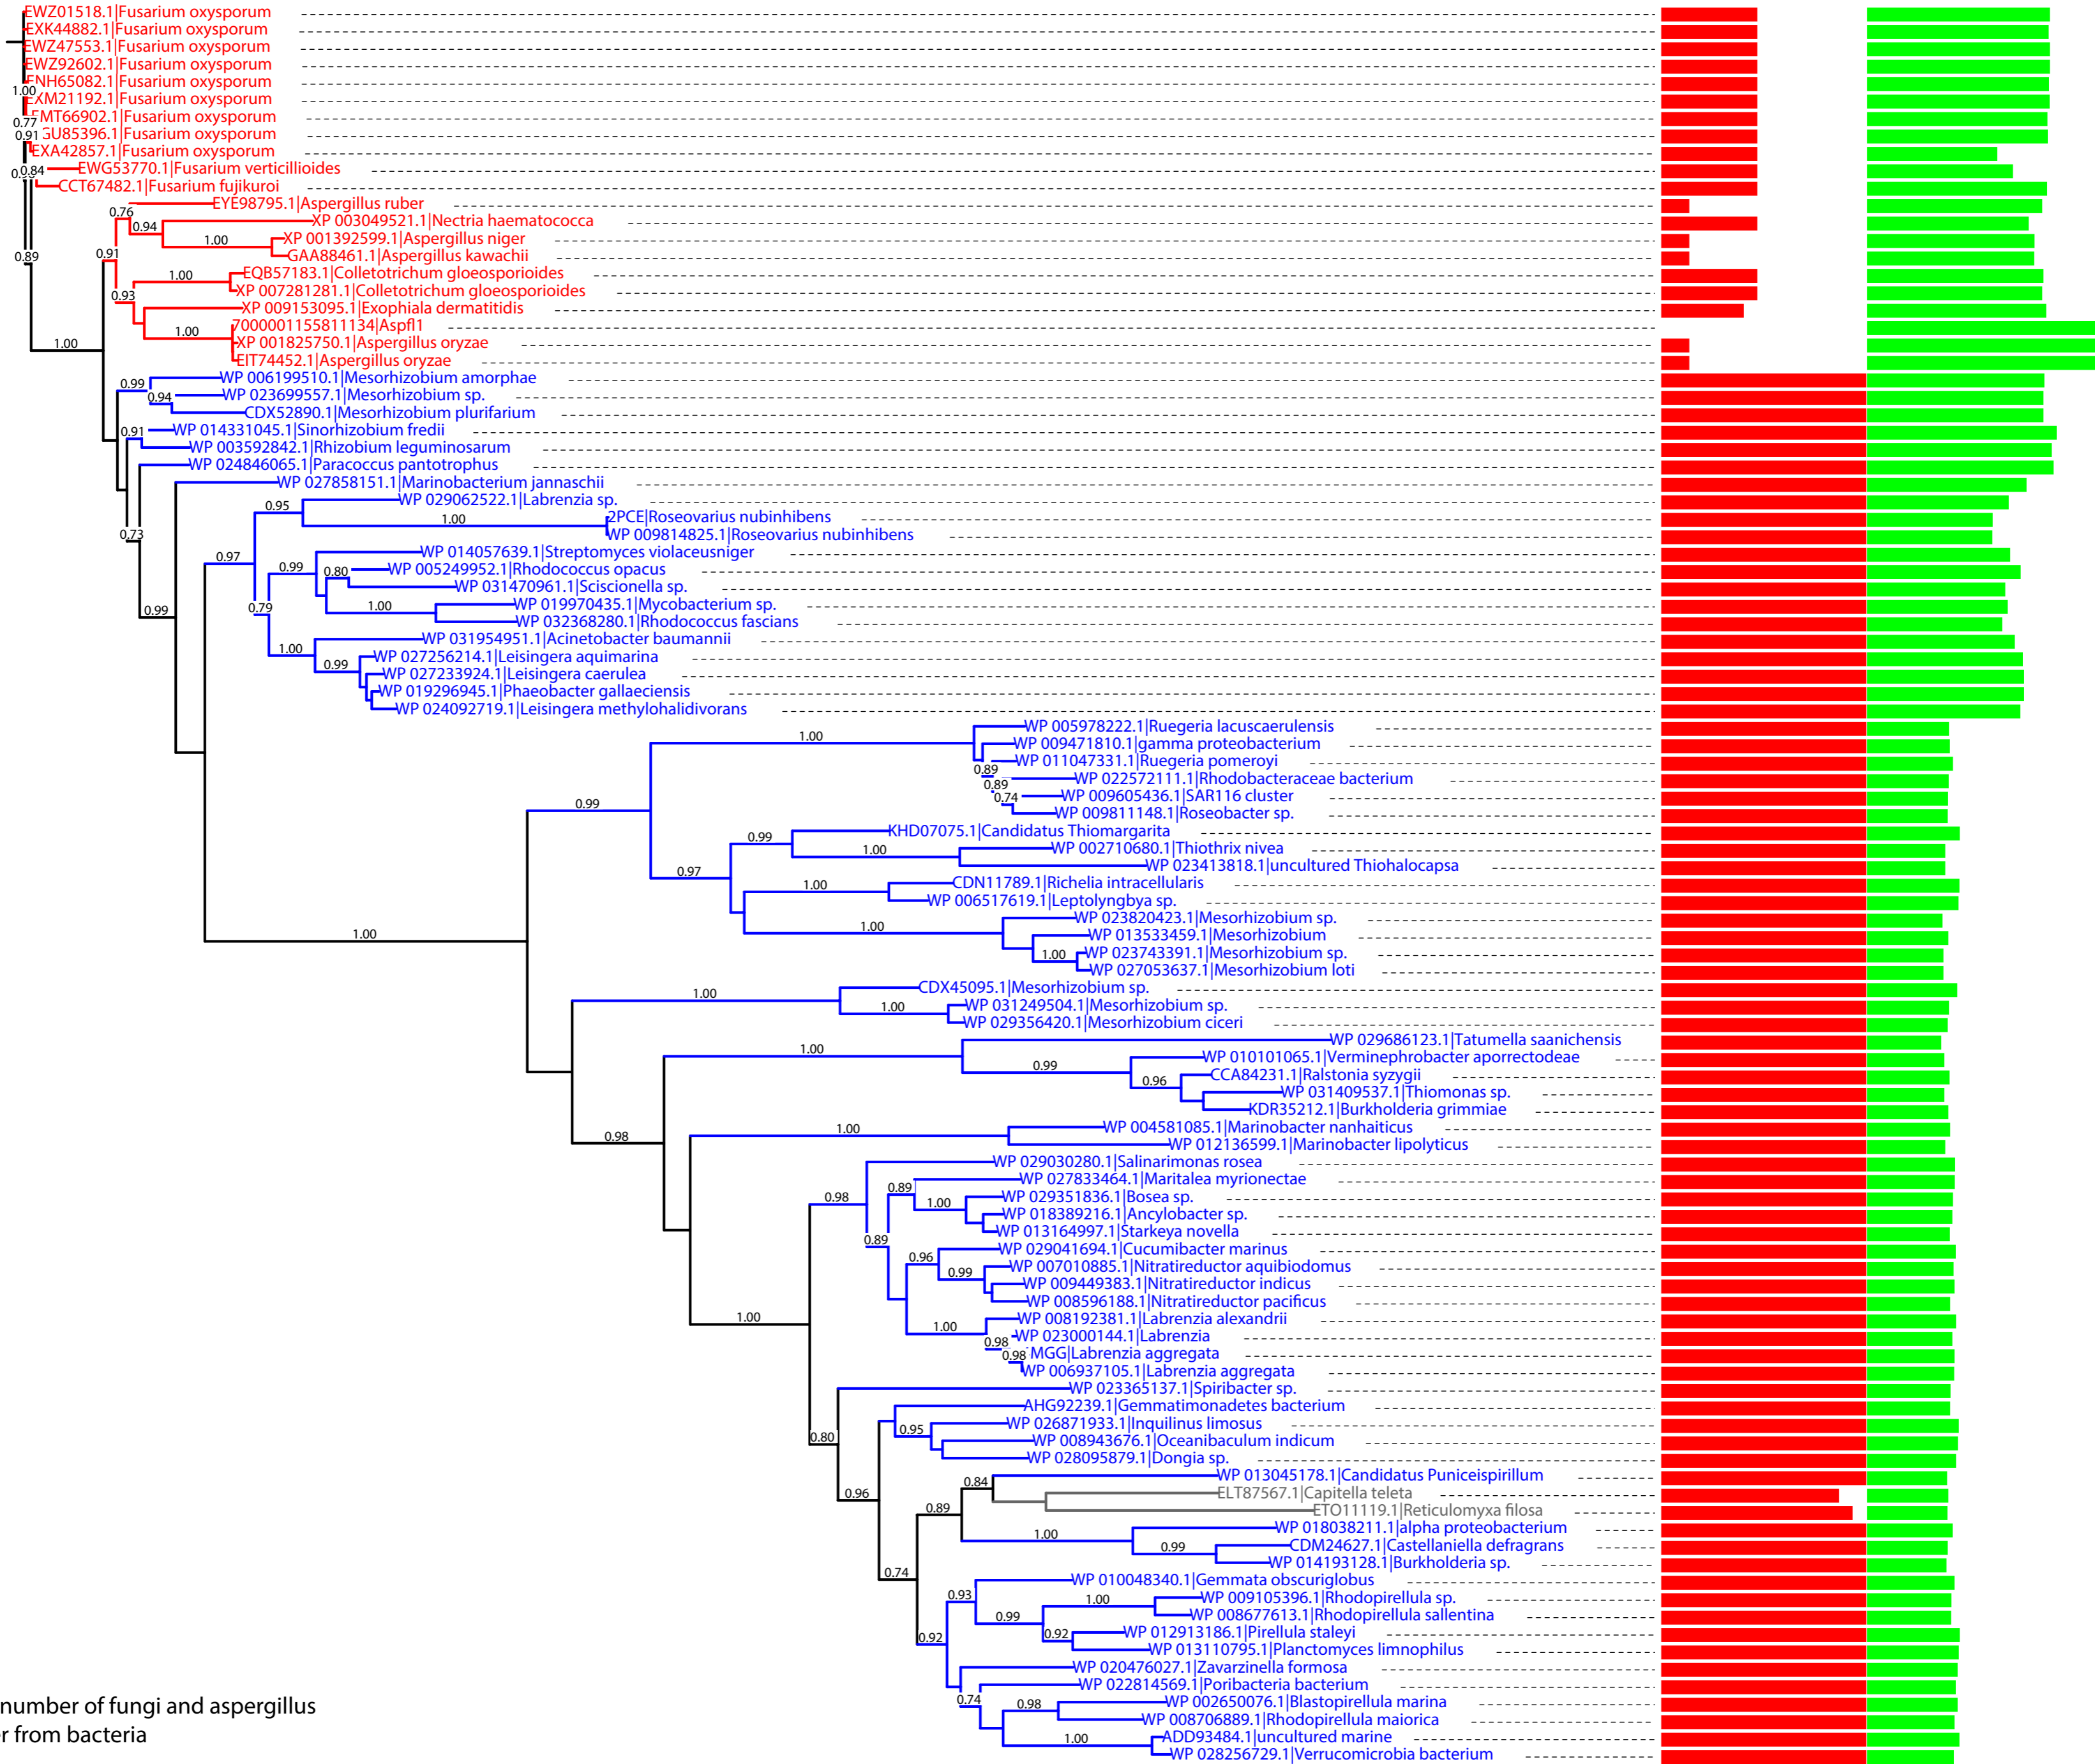

red: fungi

blue: bacteria

grey: others

found in small number of fungi and aspergillus

ancient transfer from bacteria

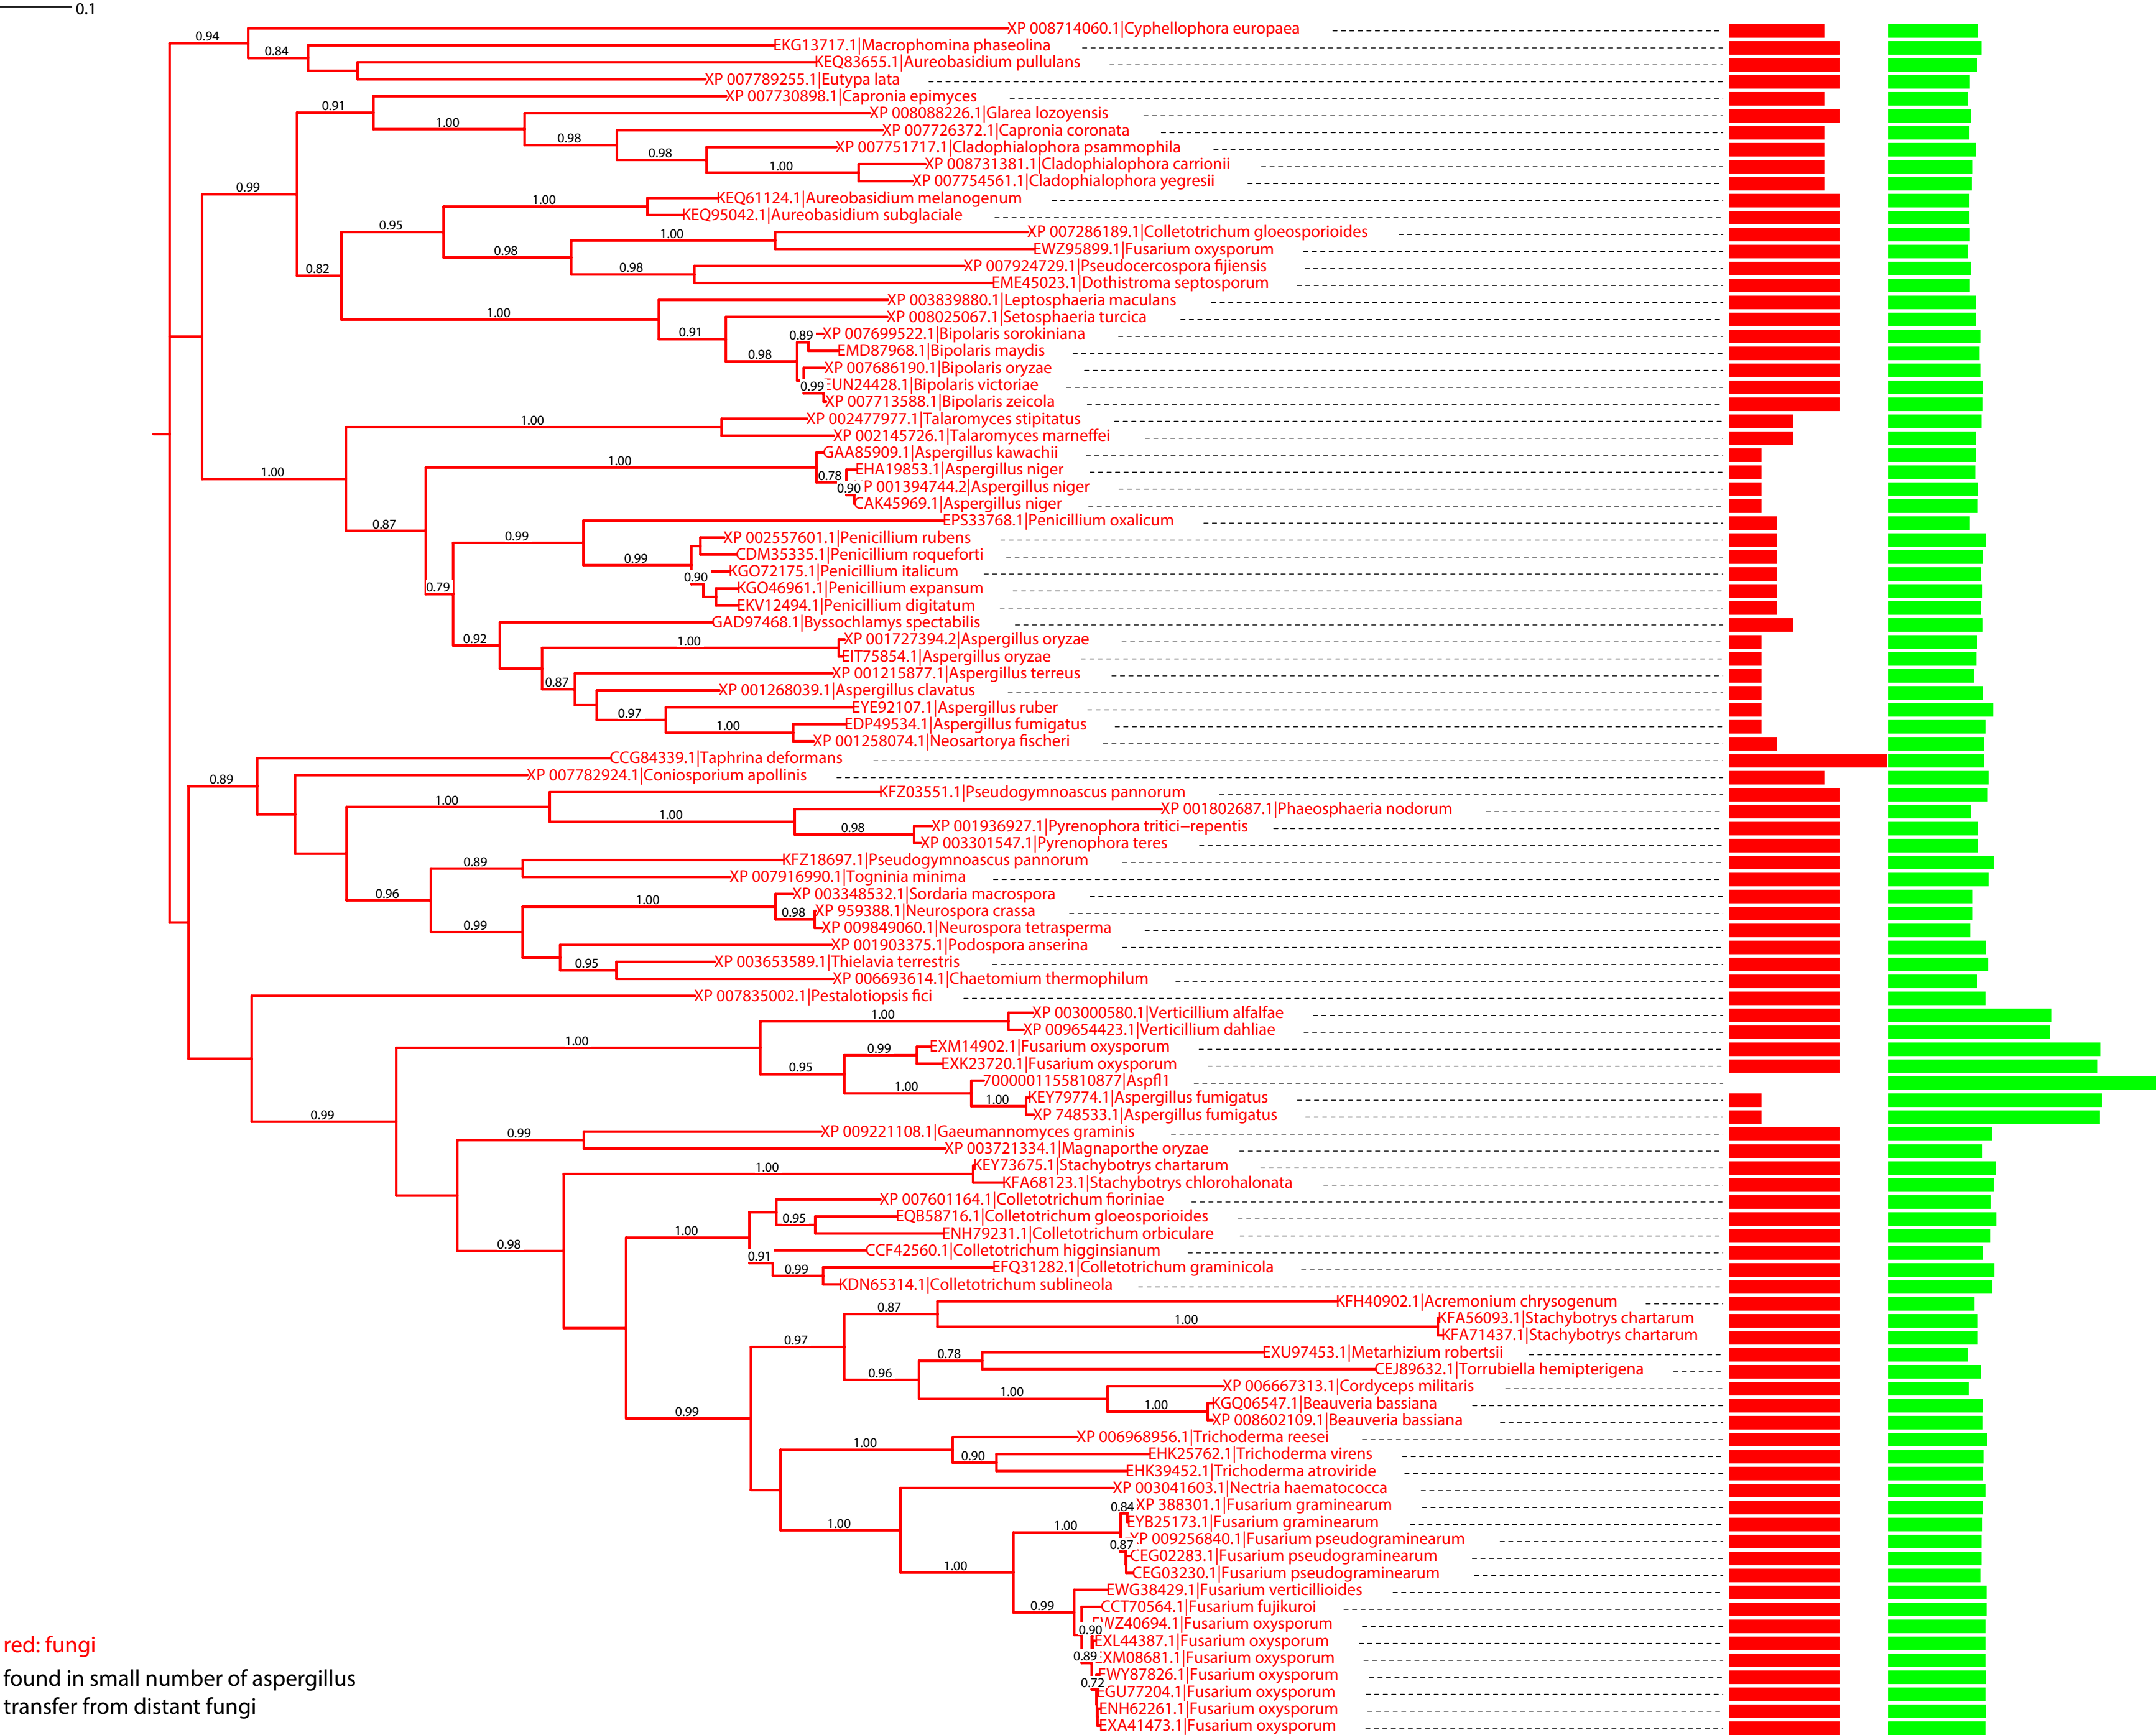

0.1

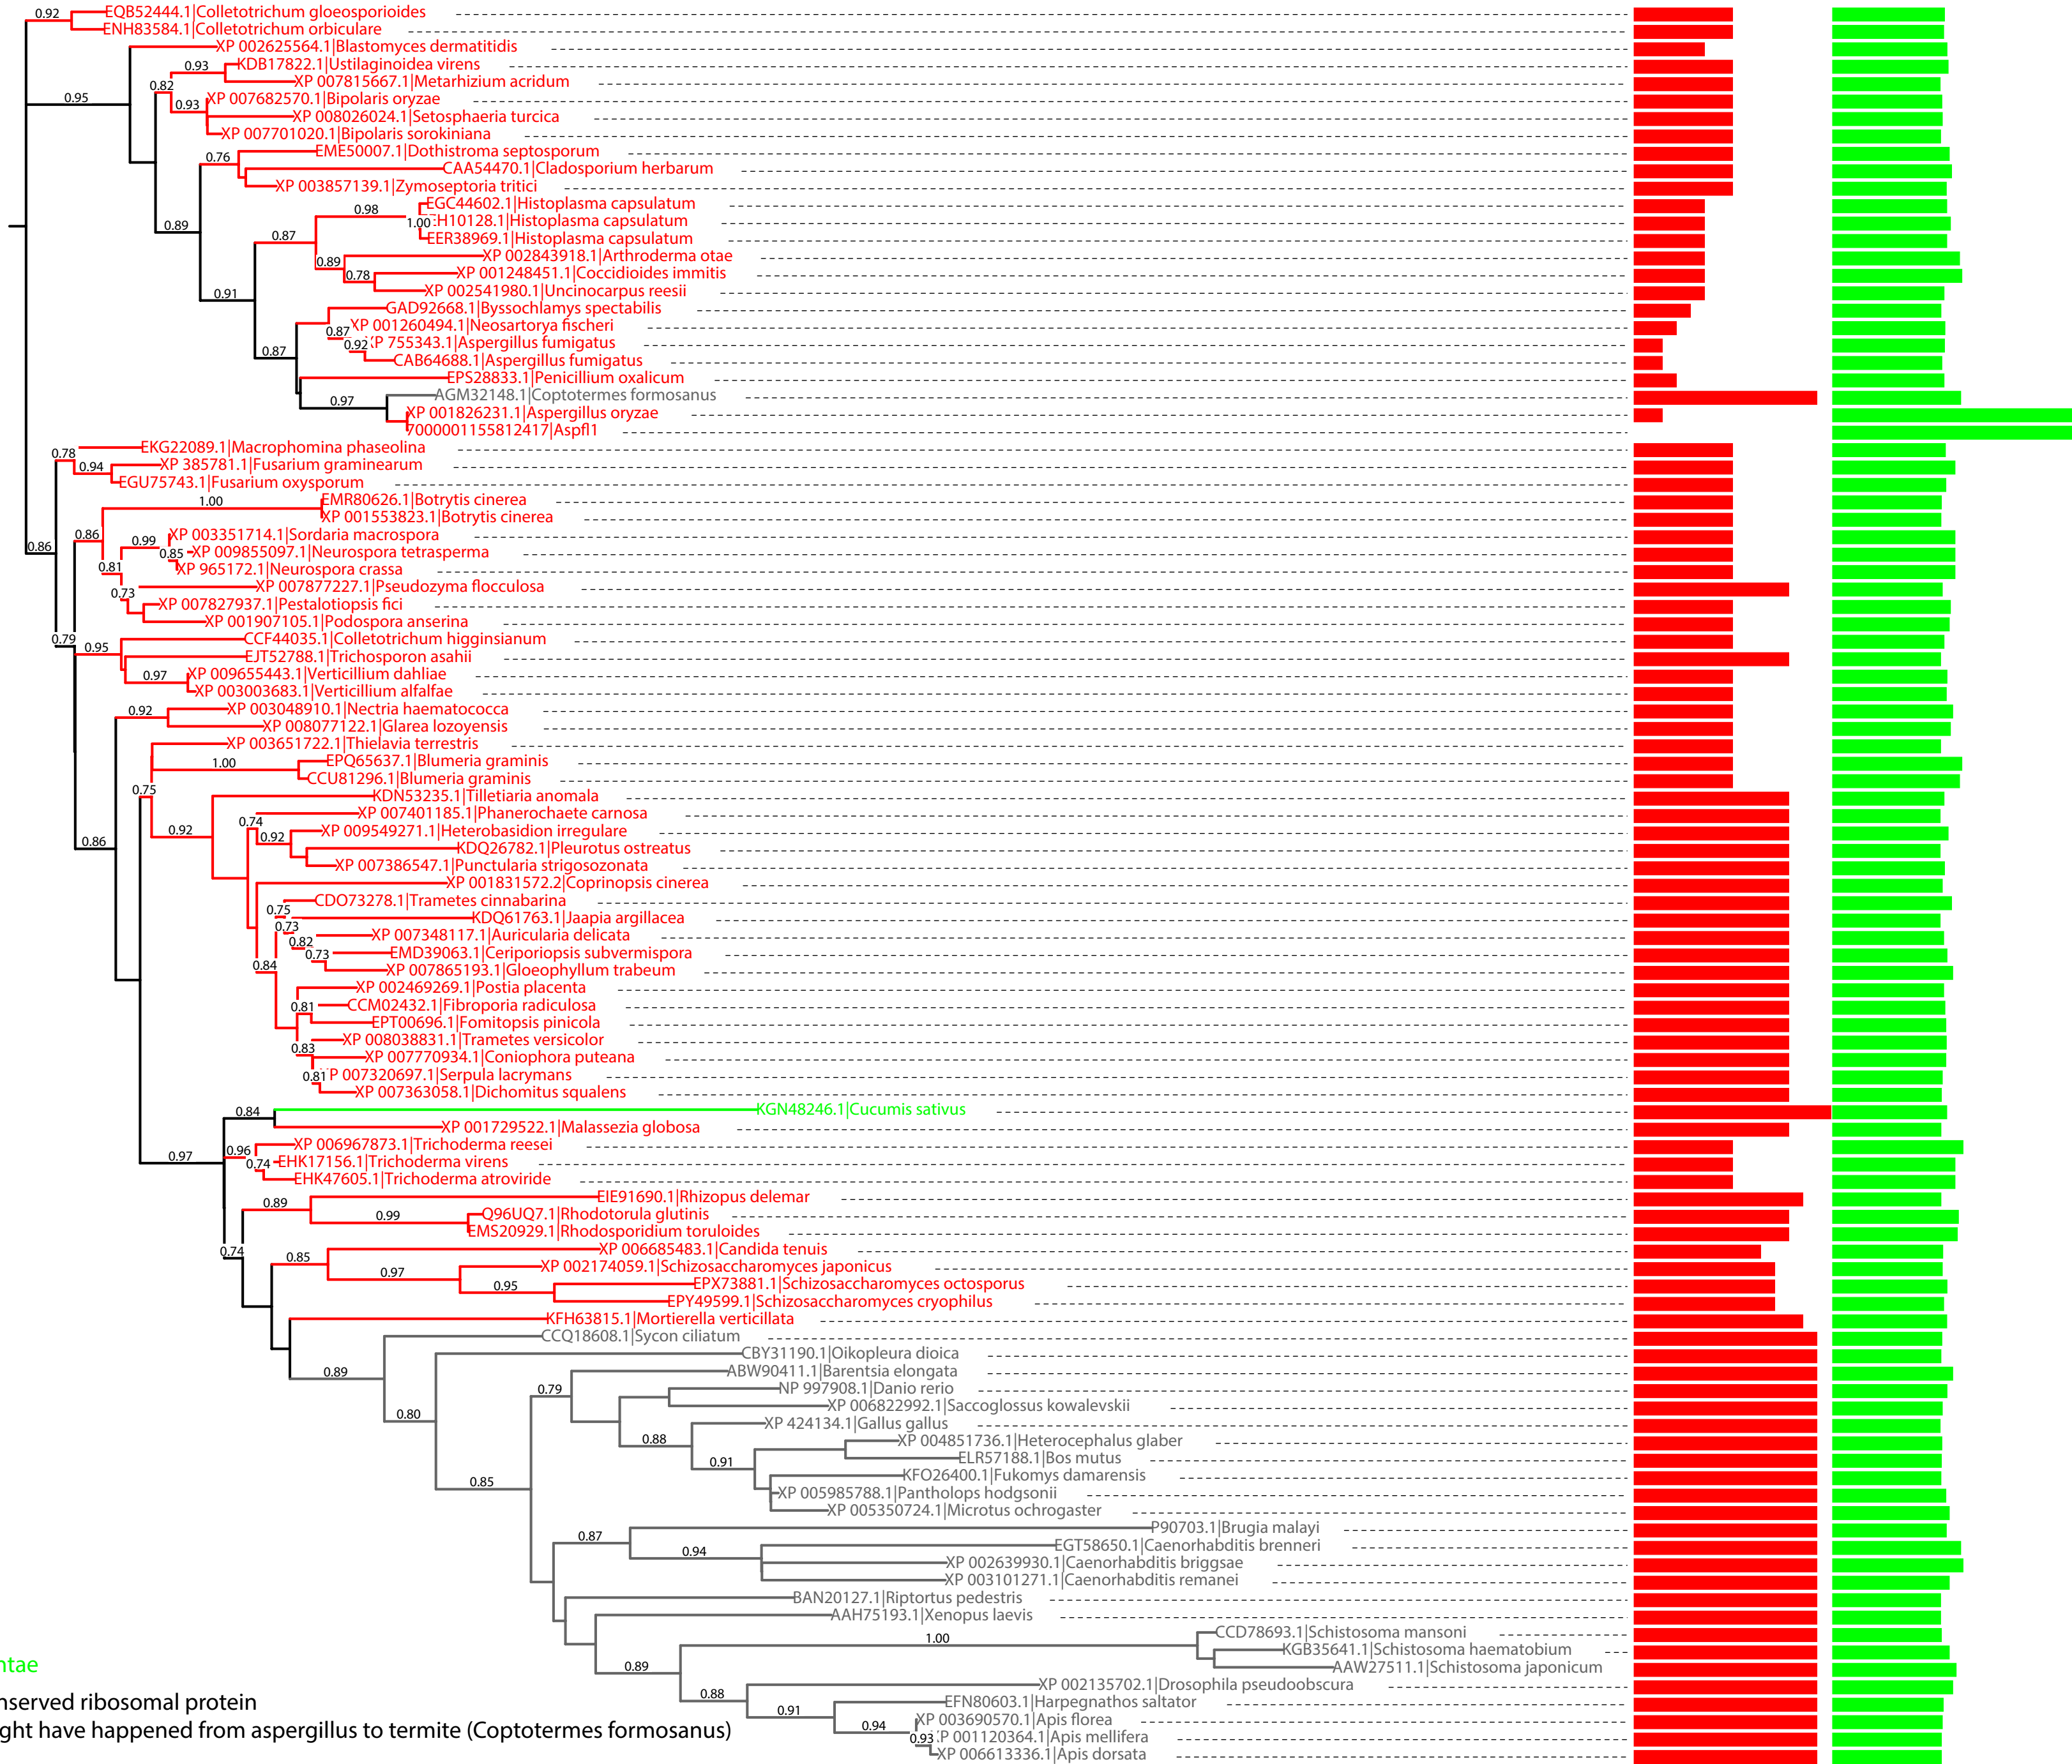

red: fungi  
grey: others  
green: viridiplantae

this is a very conserved ribosomal protein  
gene tranfer might have happened from aspergillus to termite (Coptotermes formosanus)

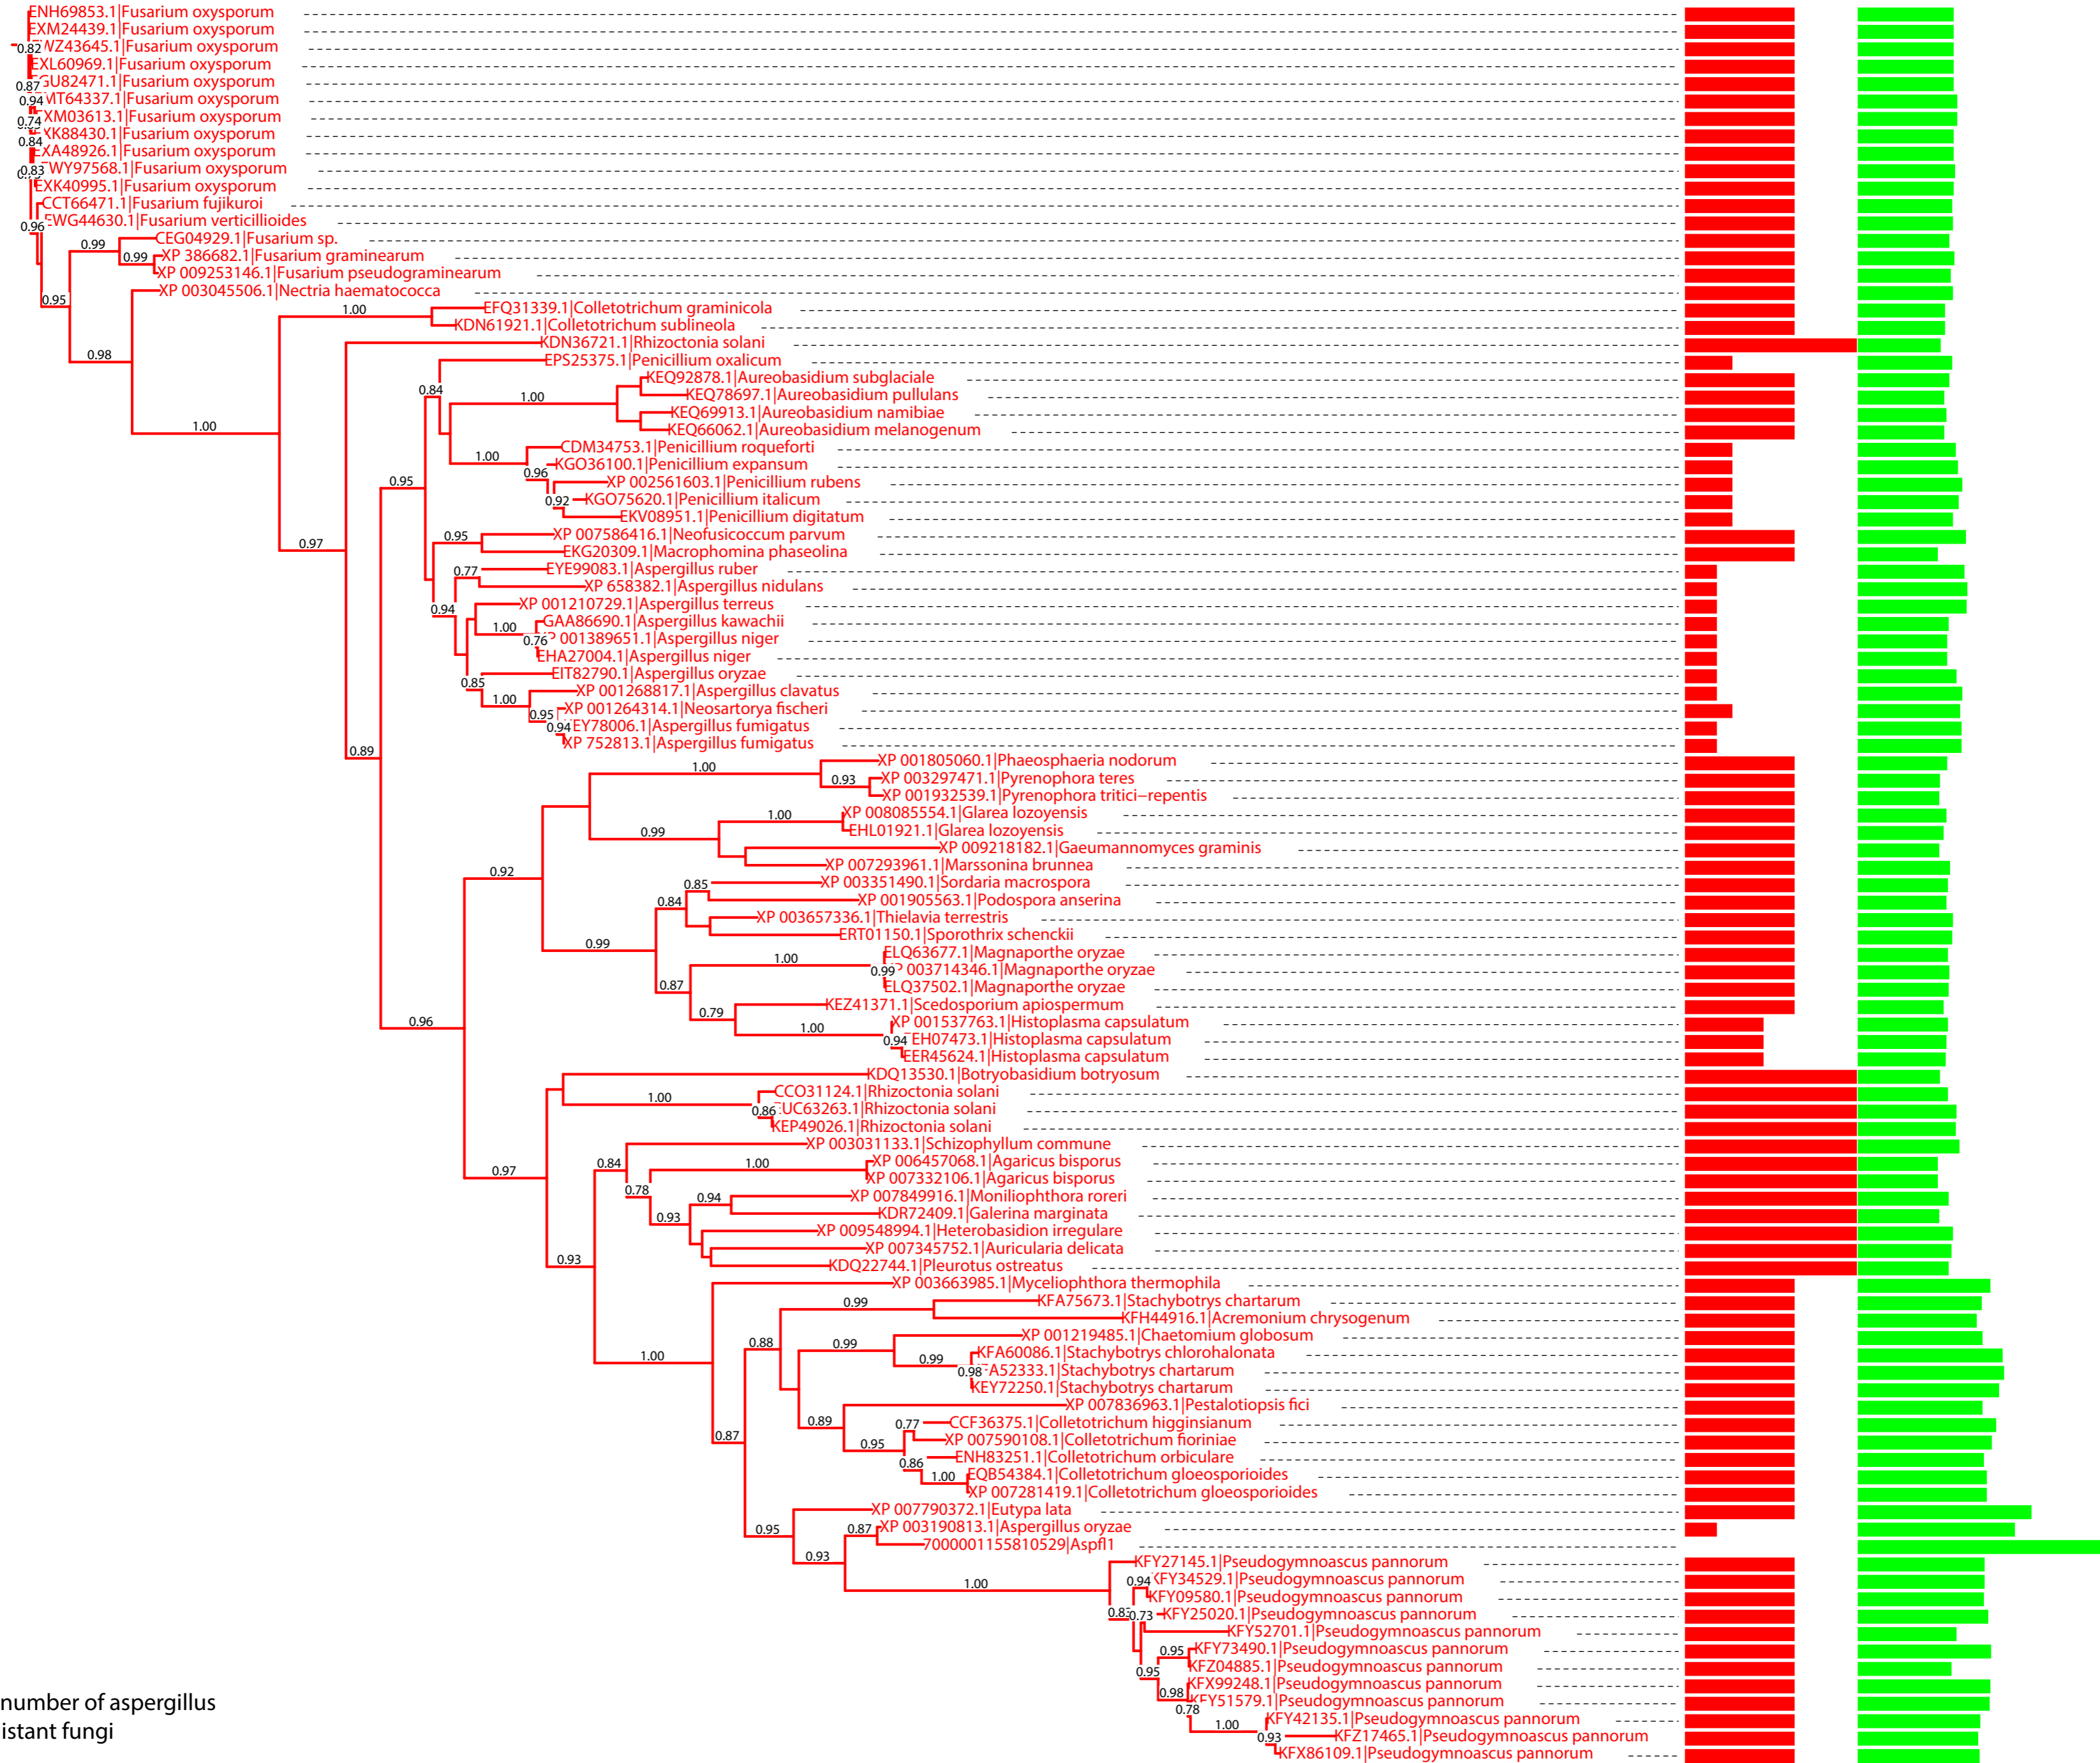

red: fungi  
found in small number of aspergillus  
transfer from distant fungi

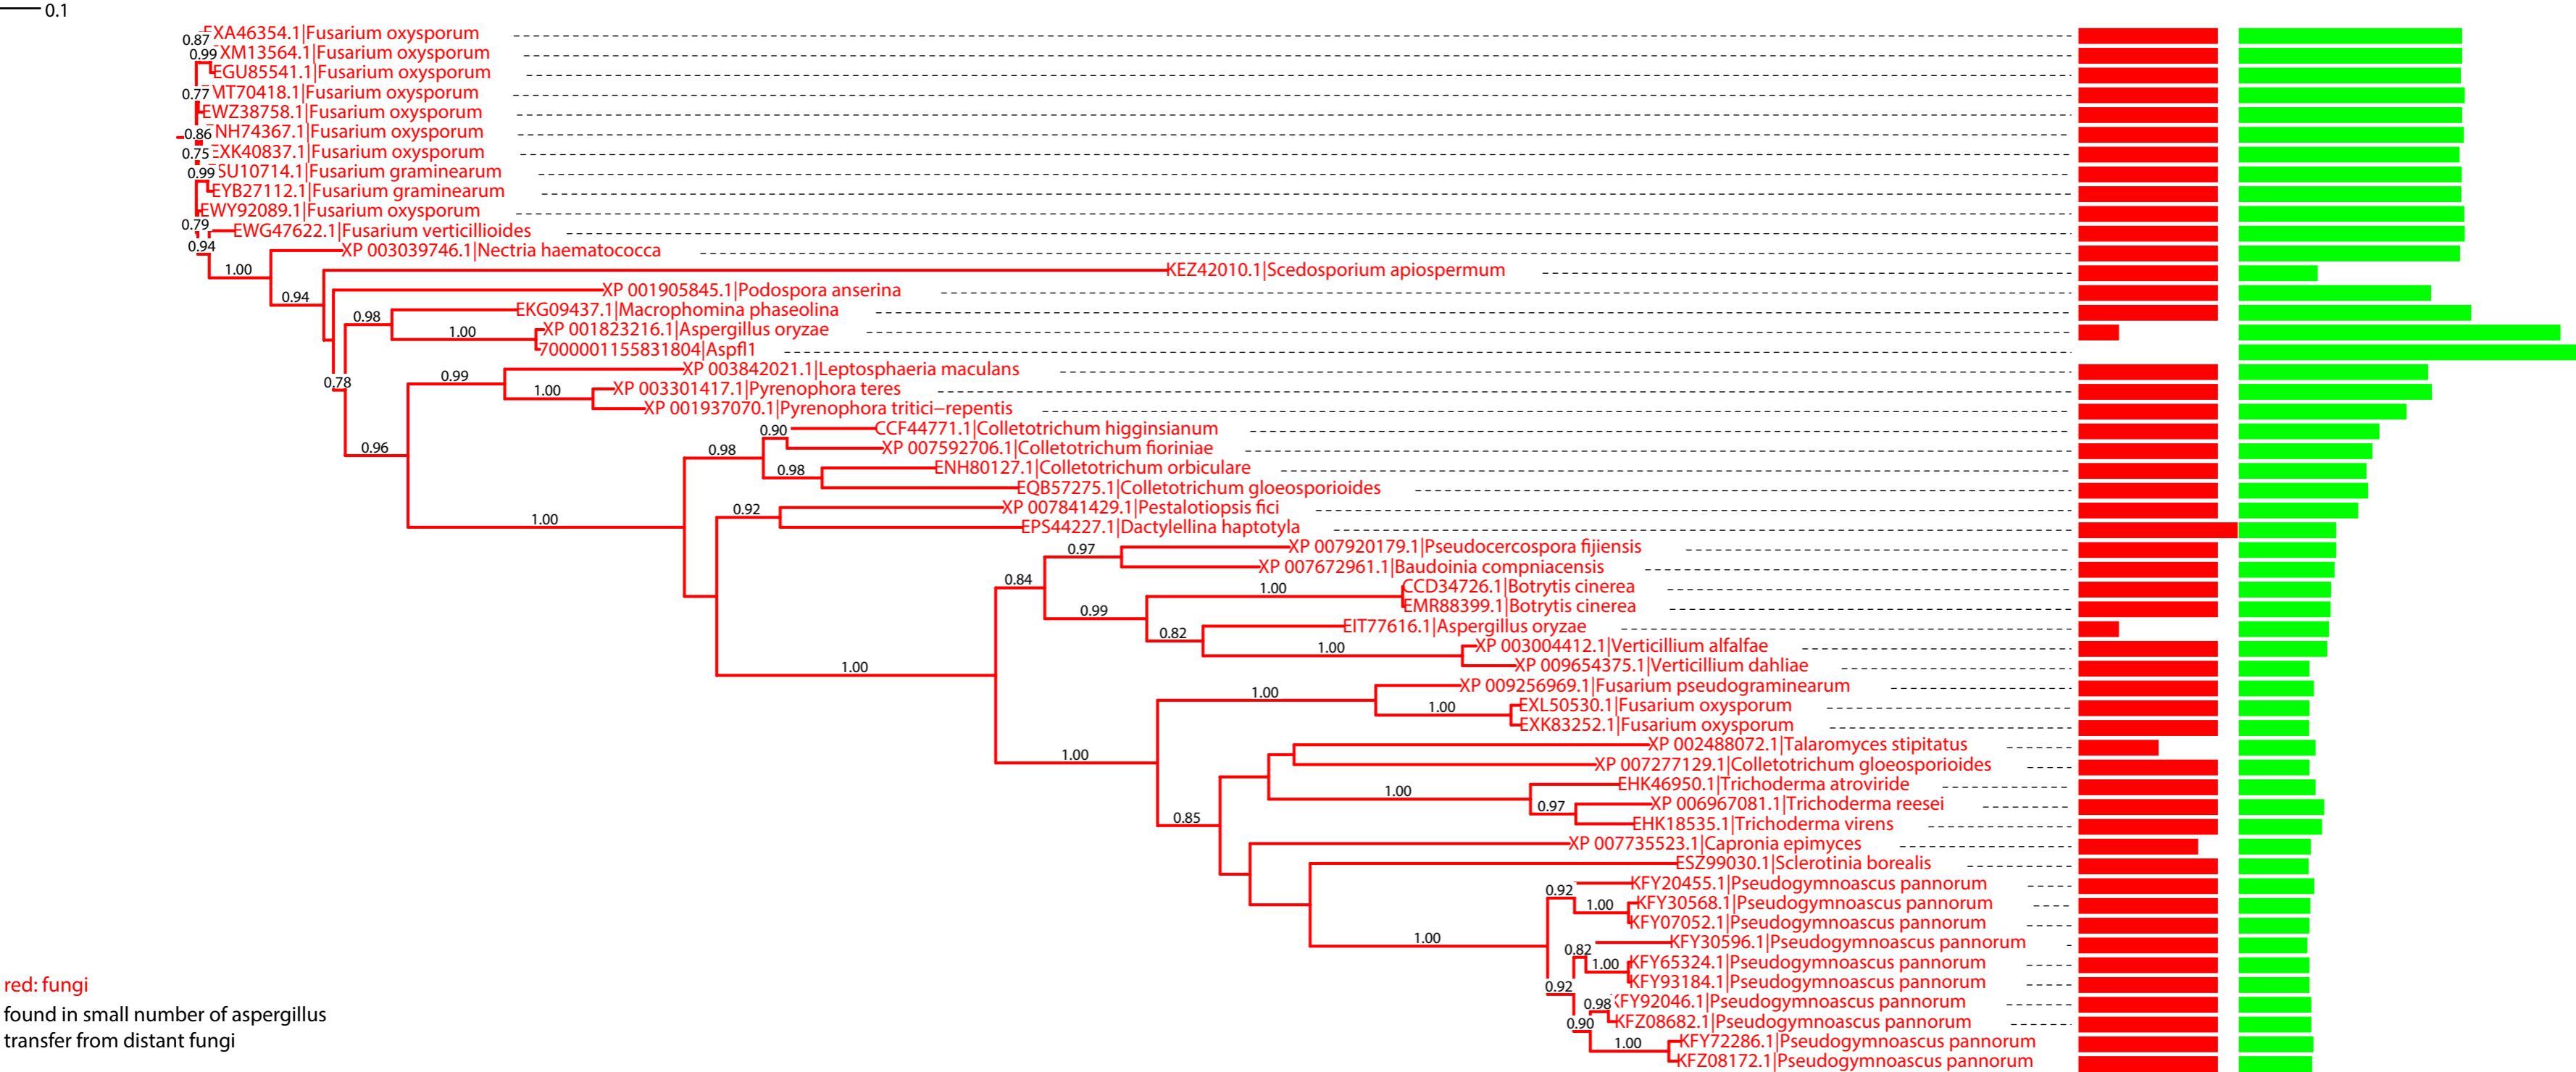

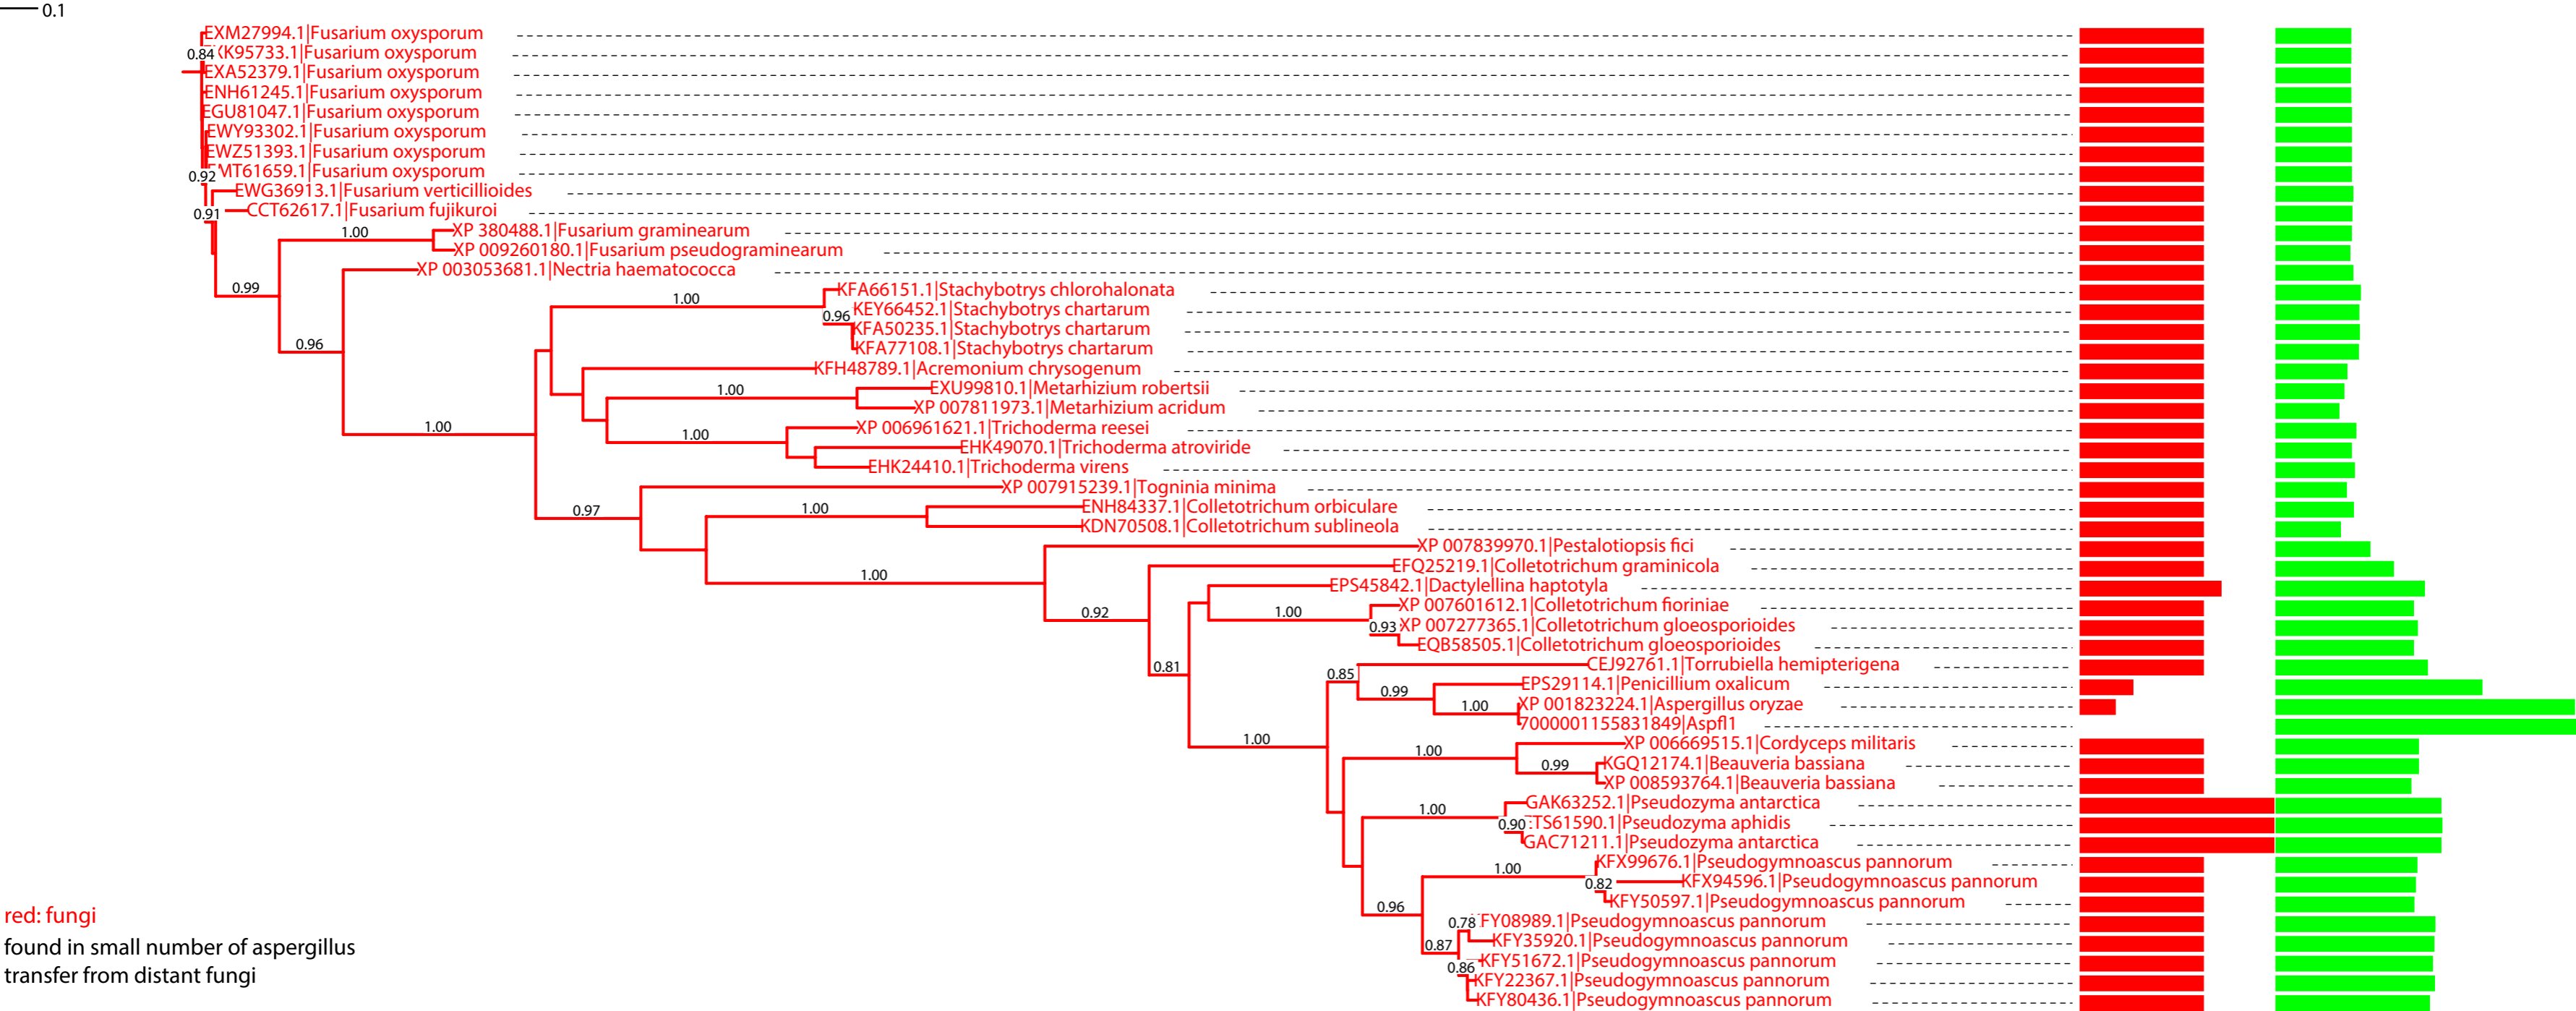

red: fungi

blue: bacteria

blue: bacteria

found in small number of fungi

ancient transfer from bacteria

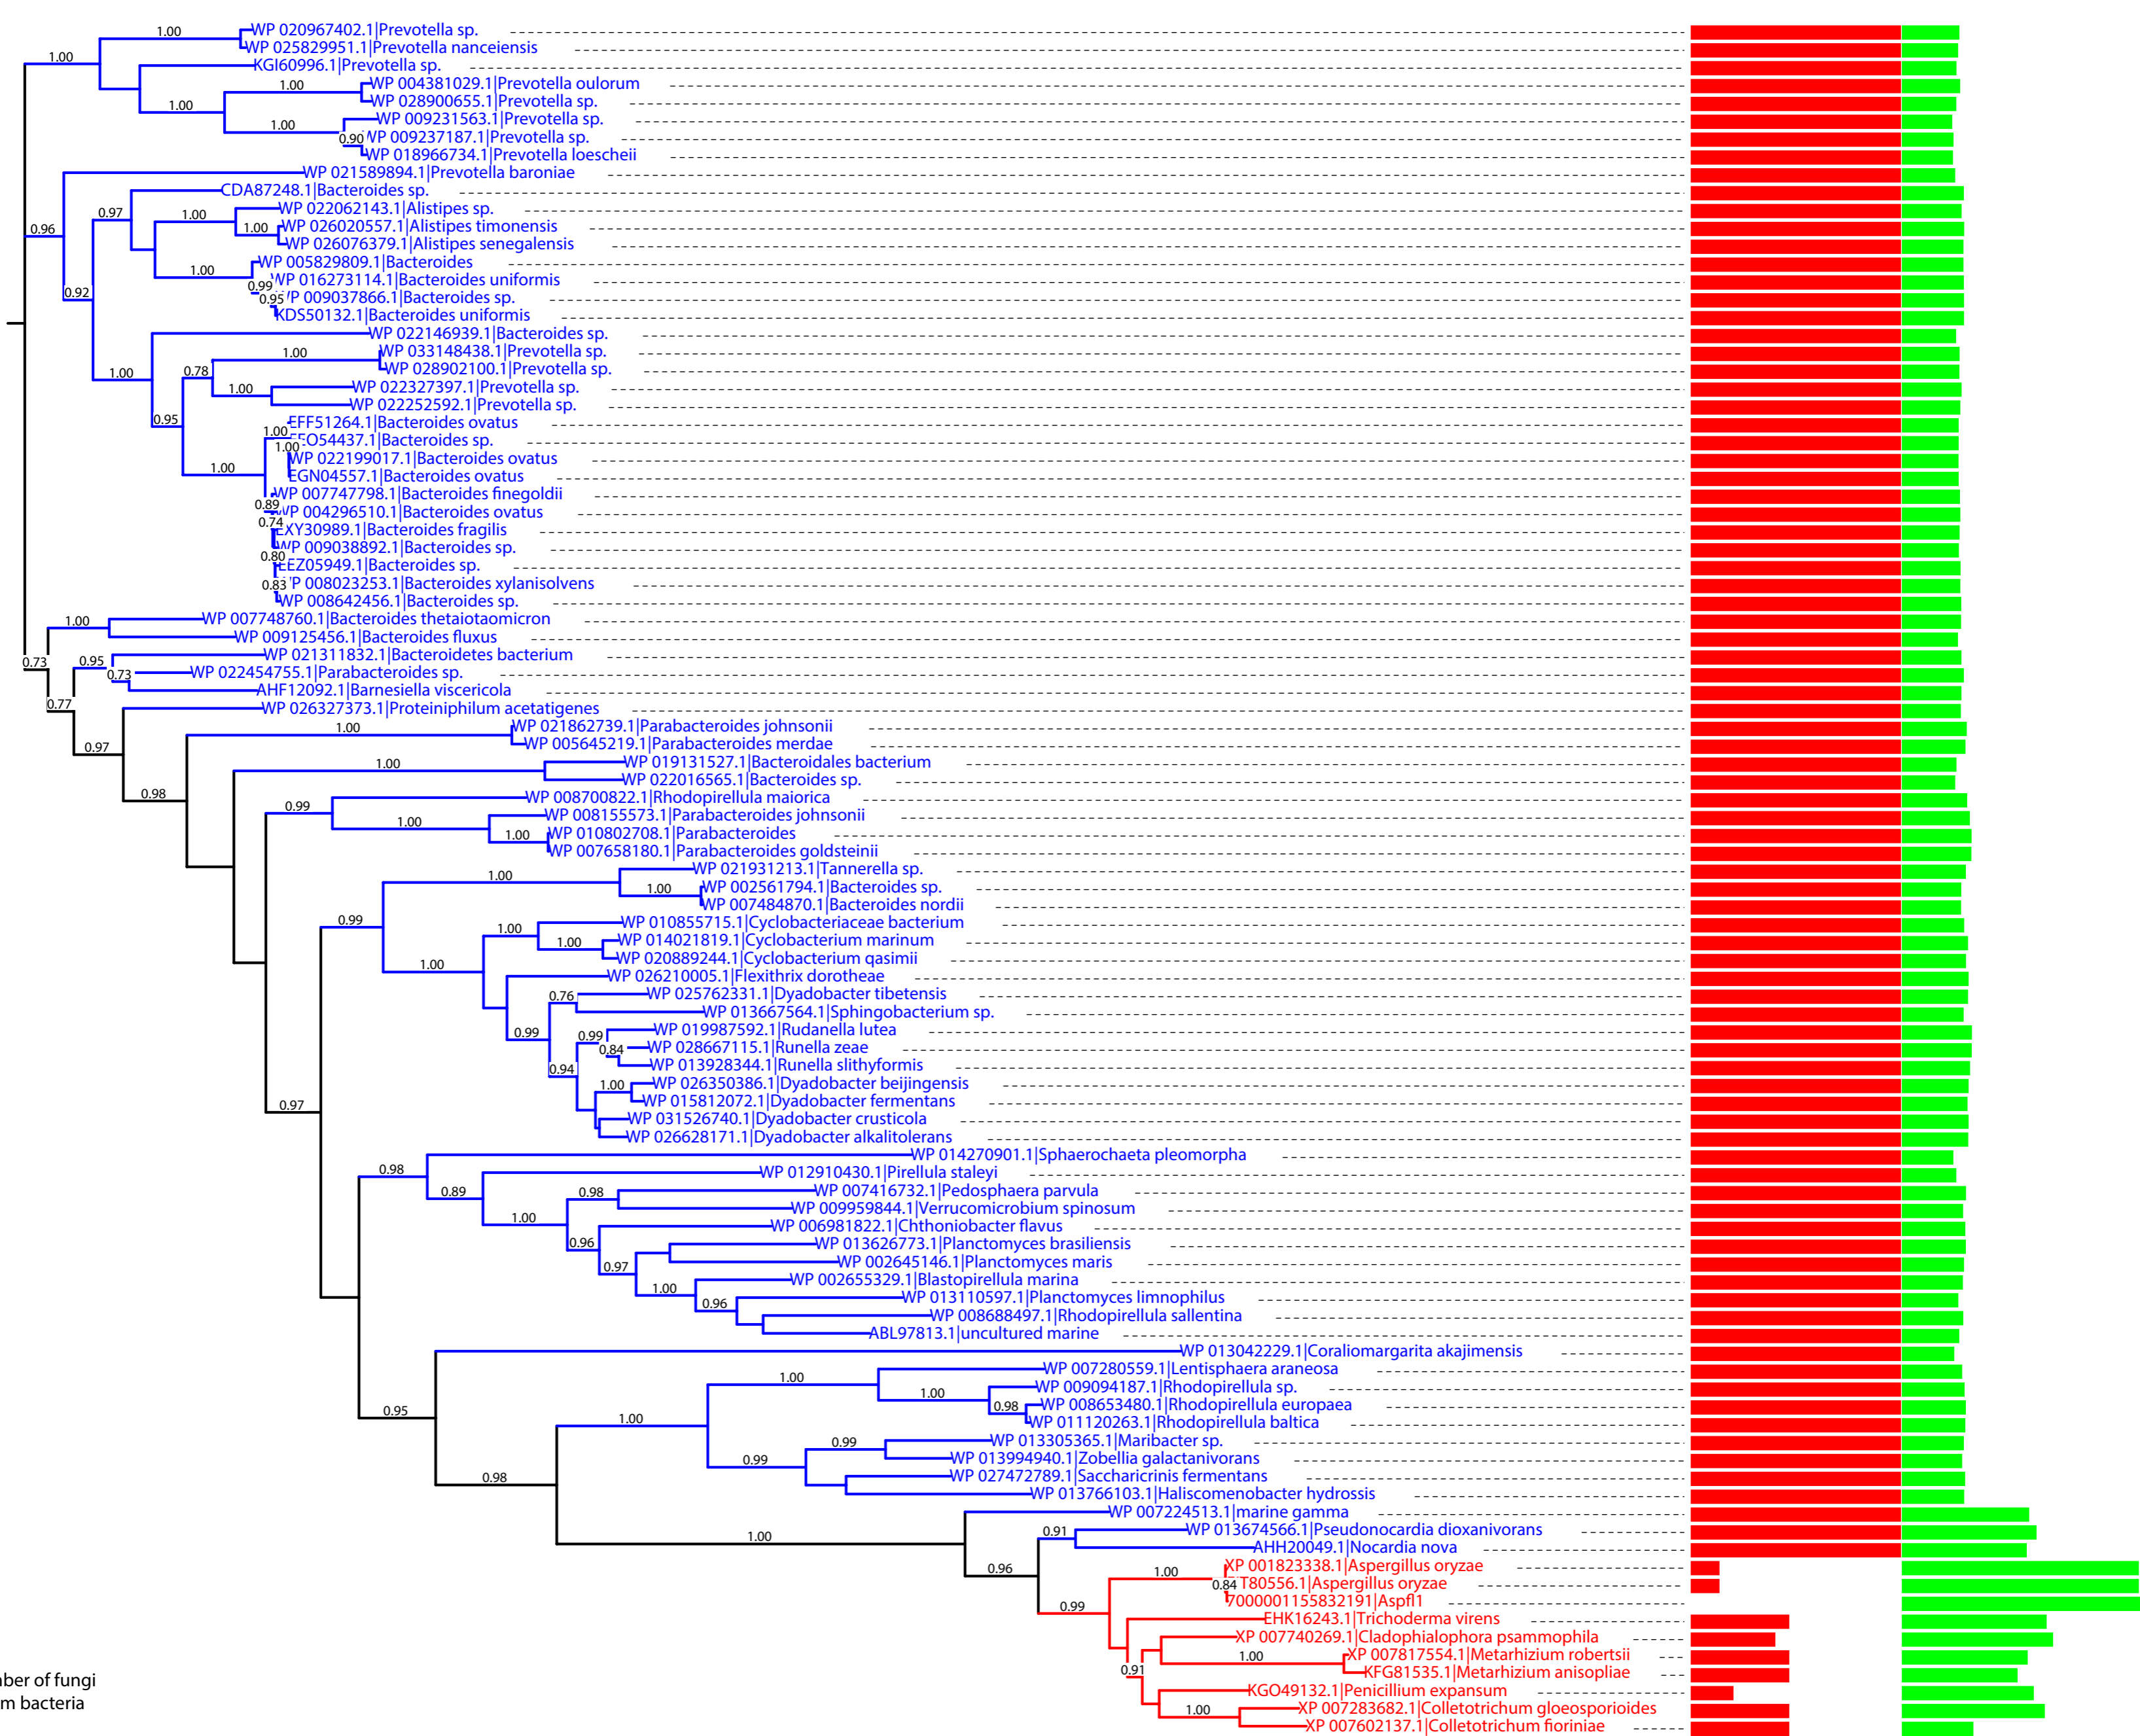

0.1

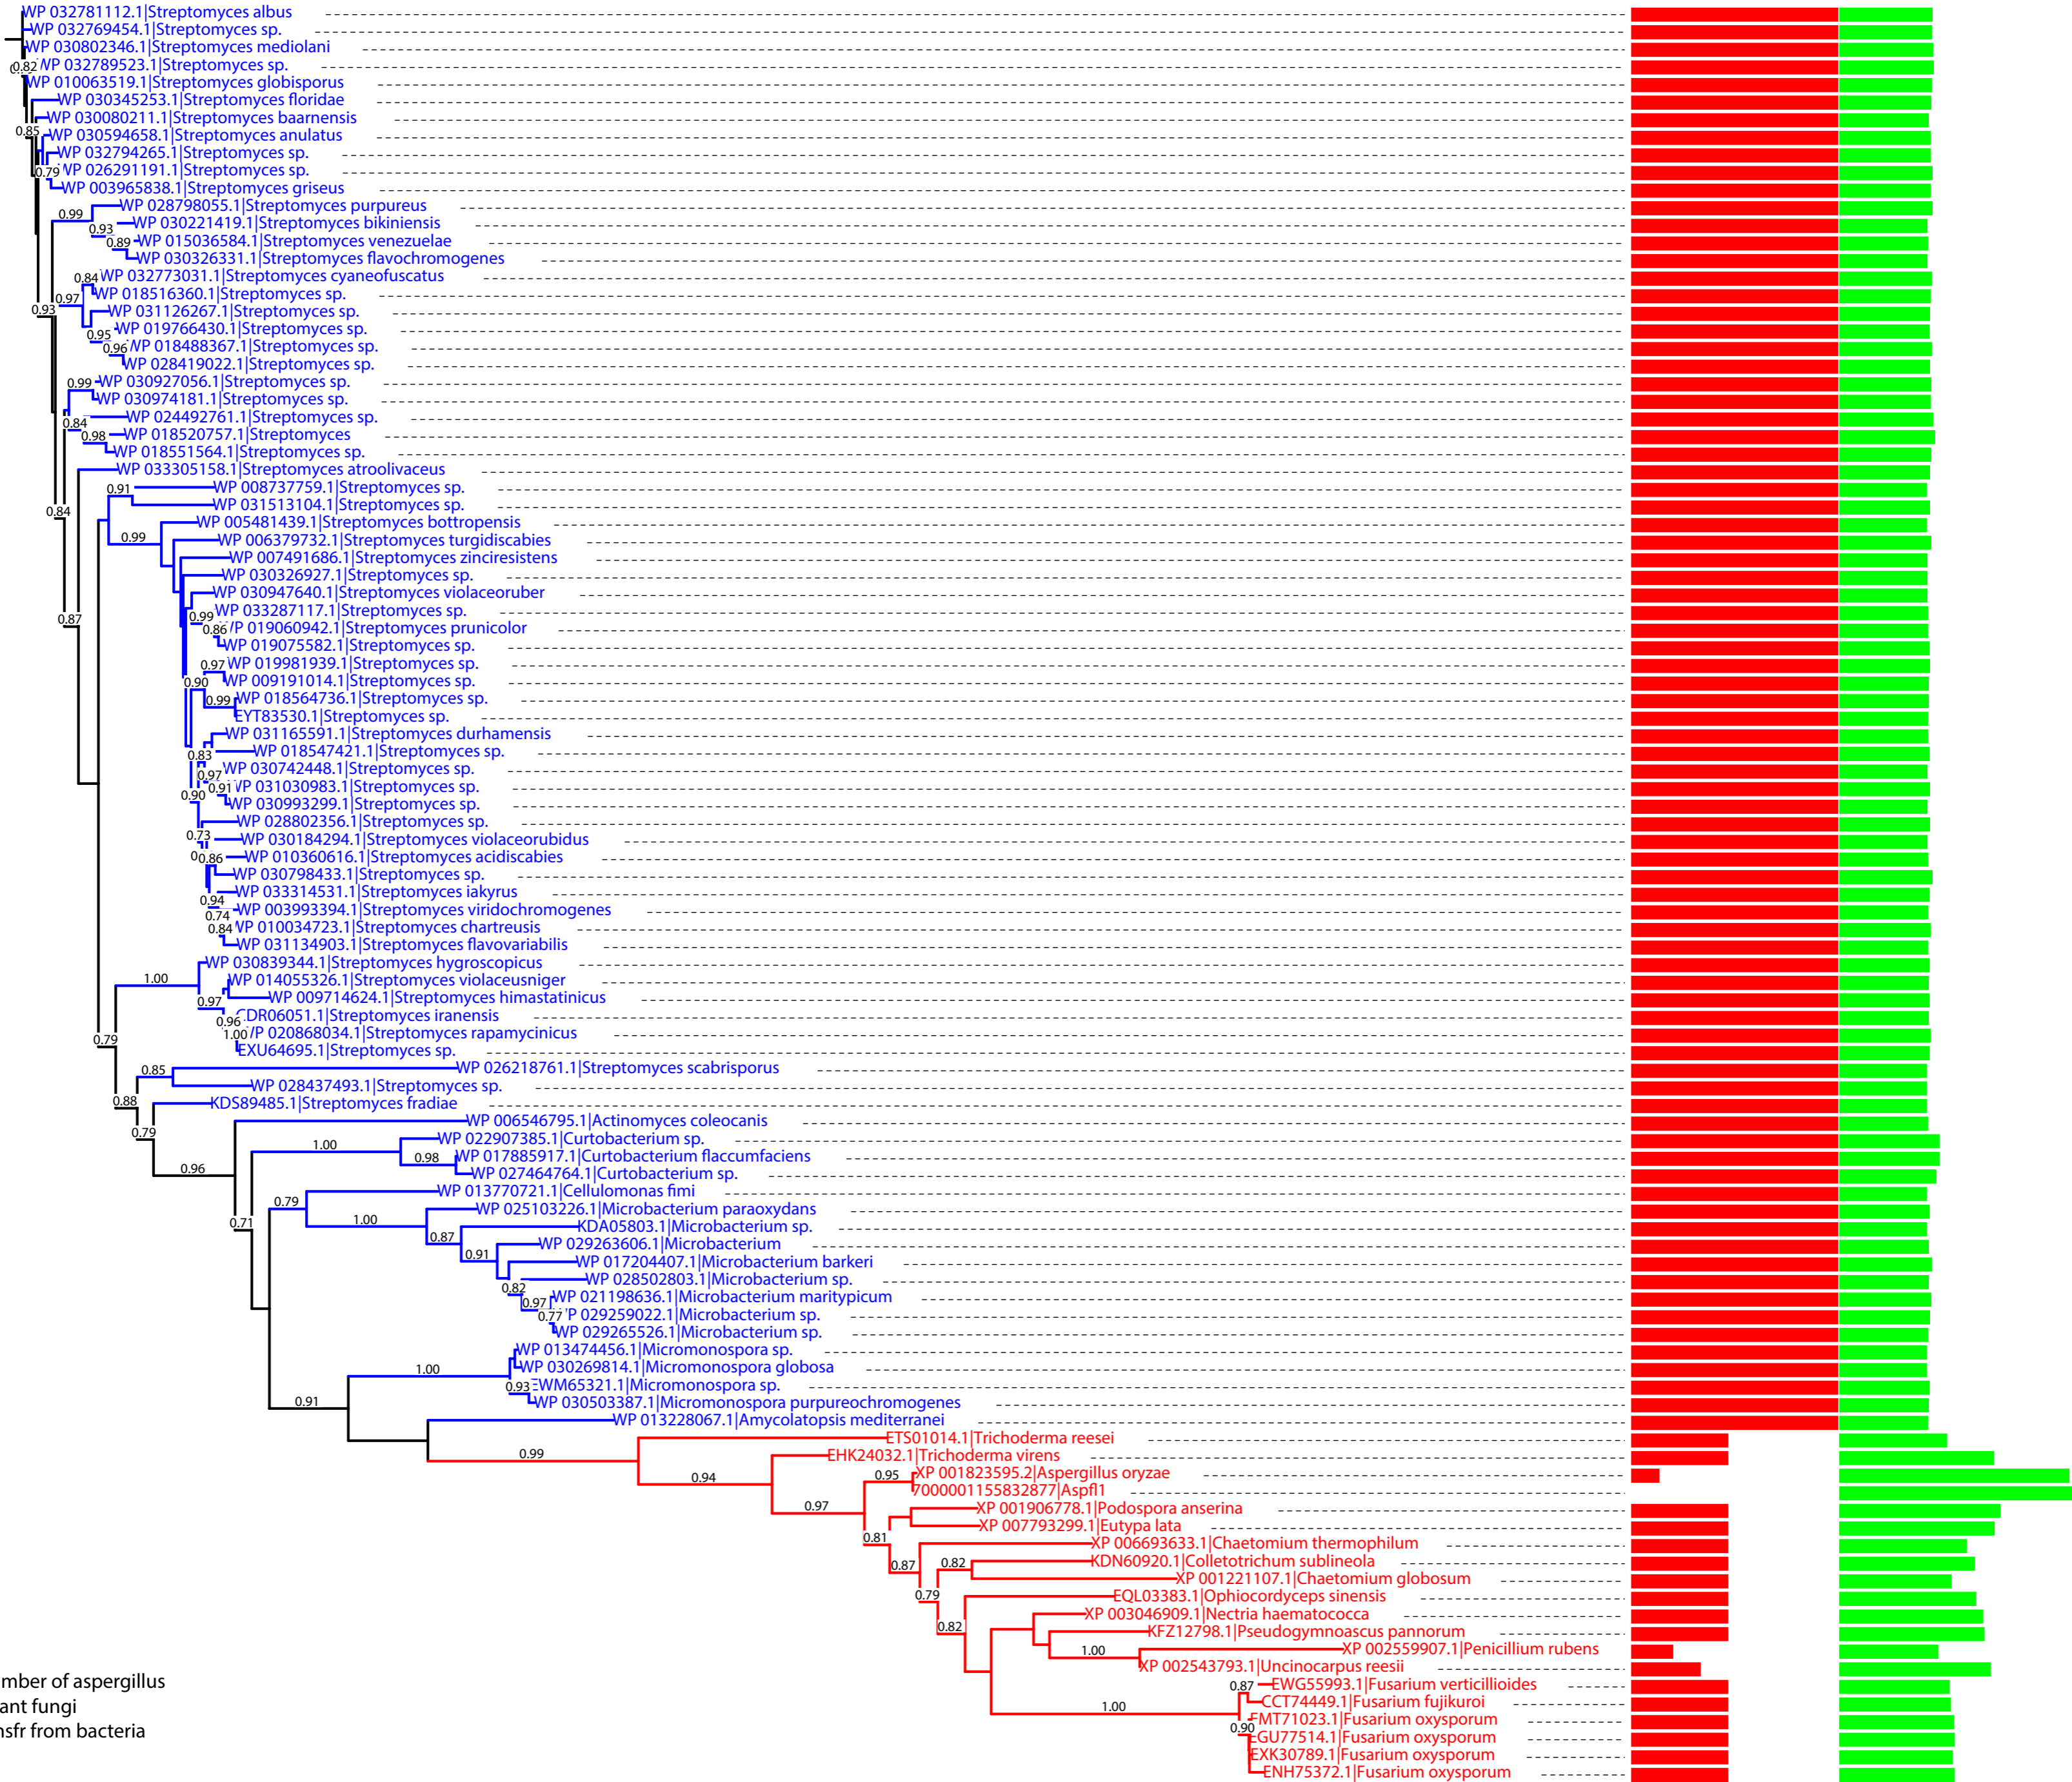

red: fungi

blue: bacteria

found in small number of aspergillus

transfer from distant fungi

more ancient transfr from bacteria

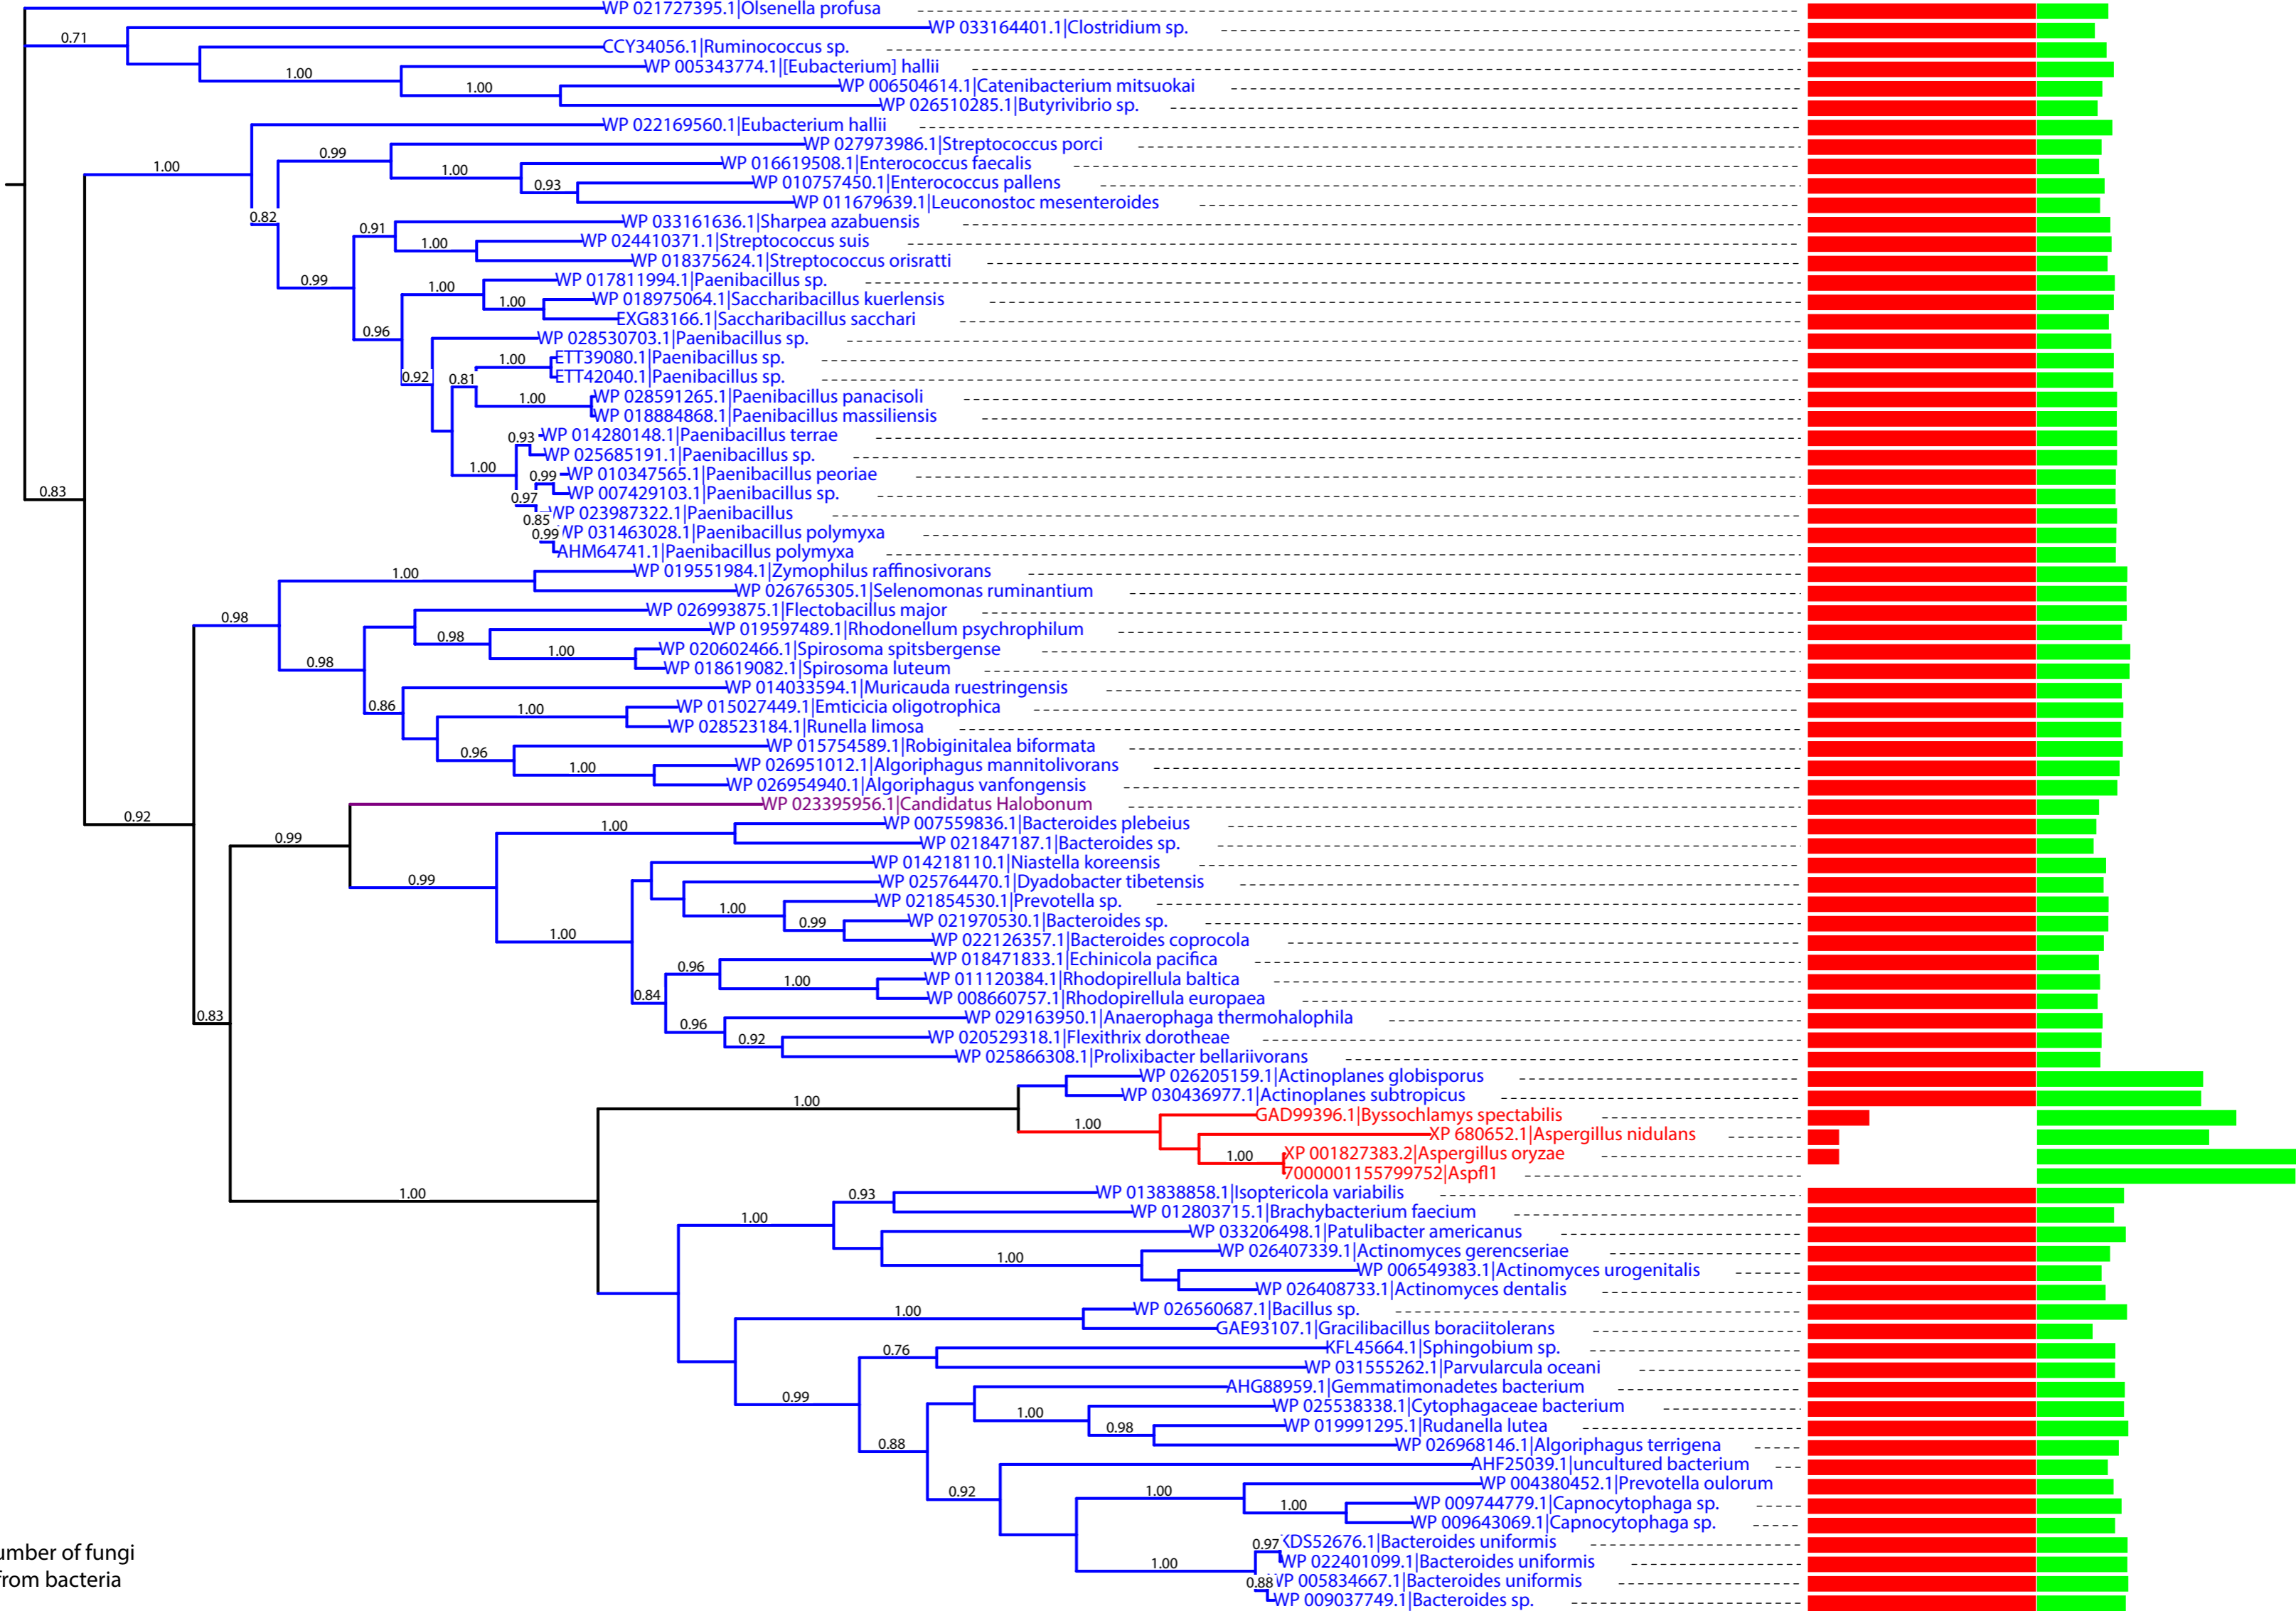

red: fungi  
blue: bacteria  
purple: archaea  
found in small number of fungi  
ancient transfer from bacteria

0.1

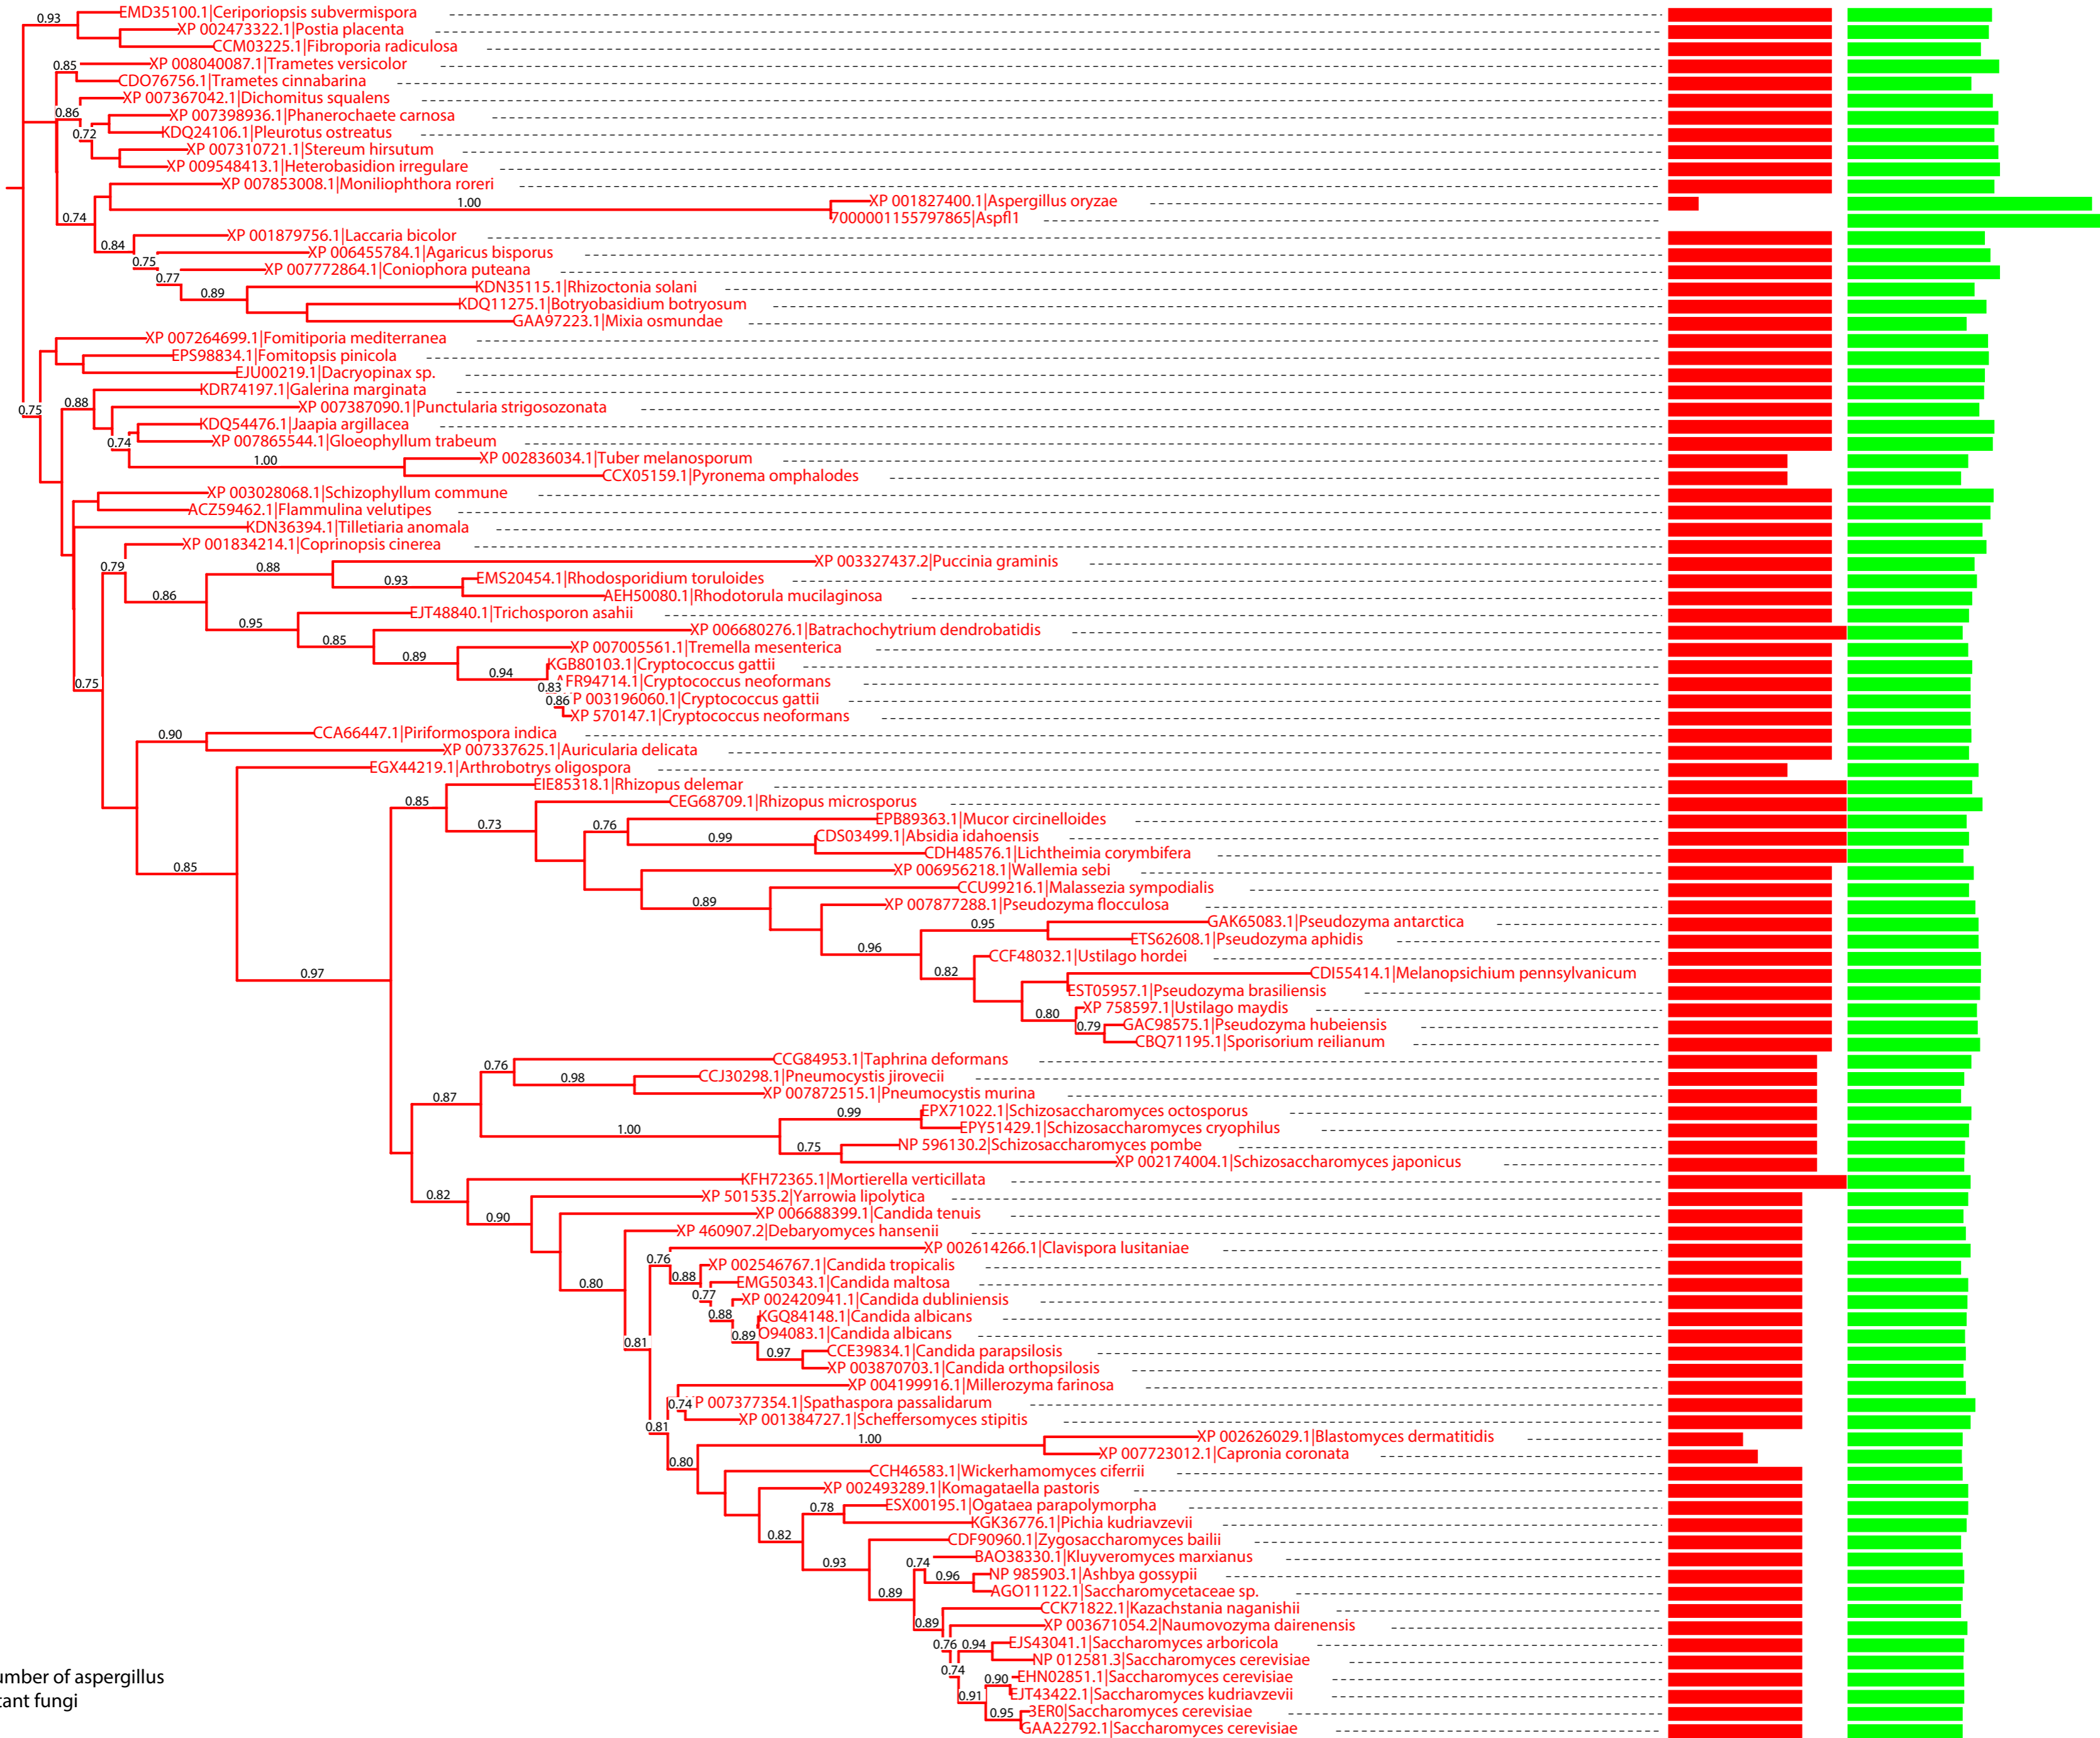

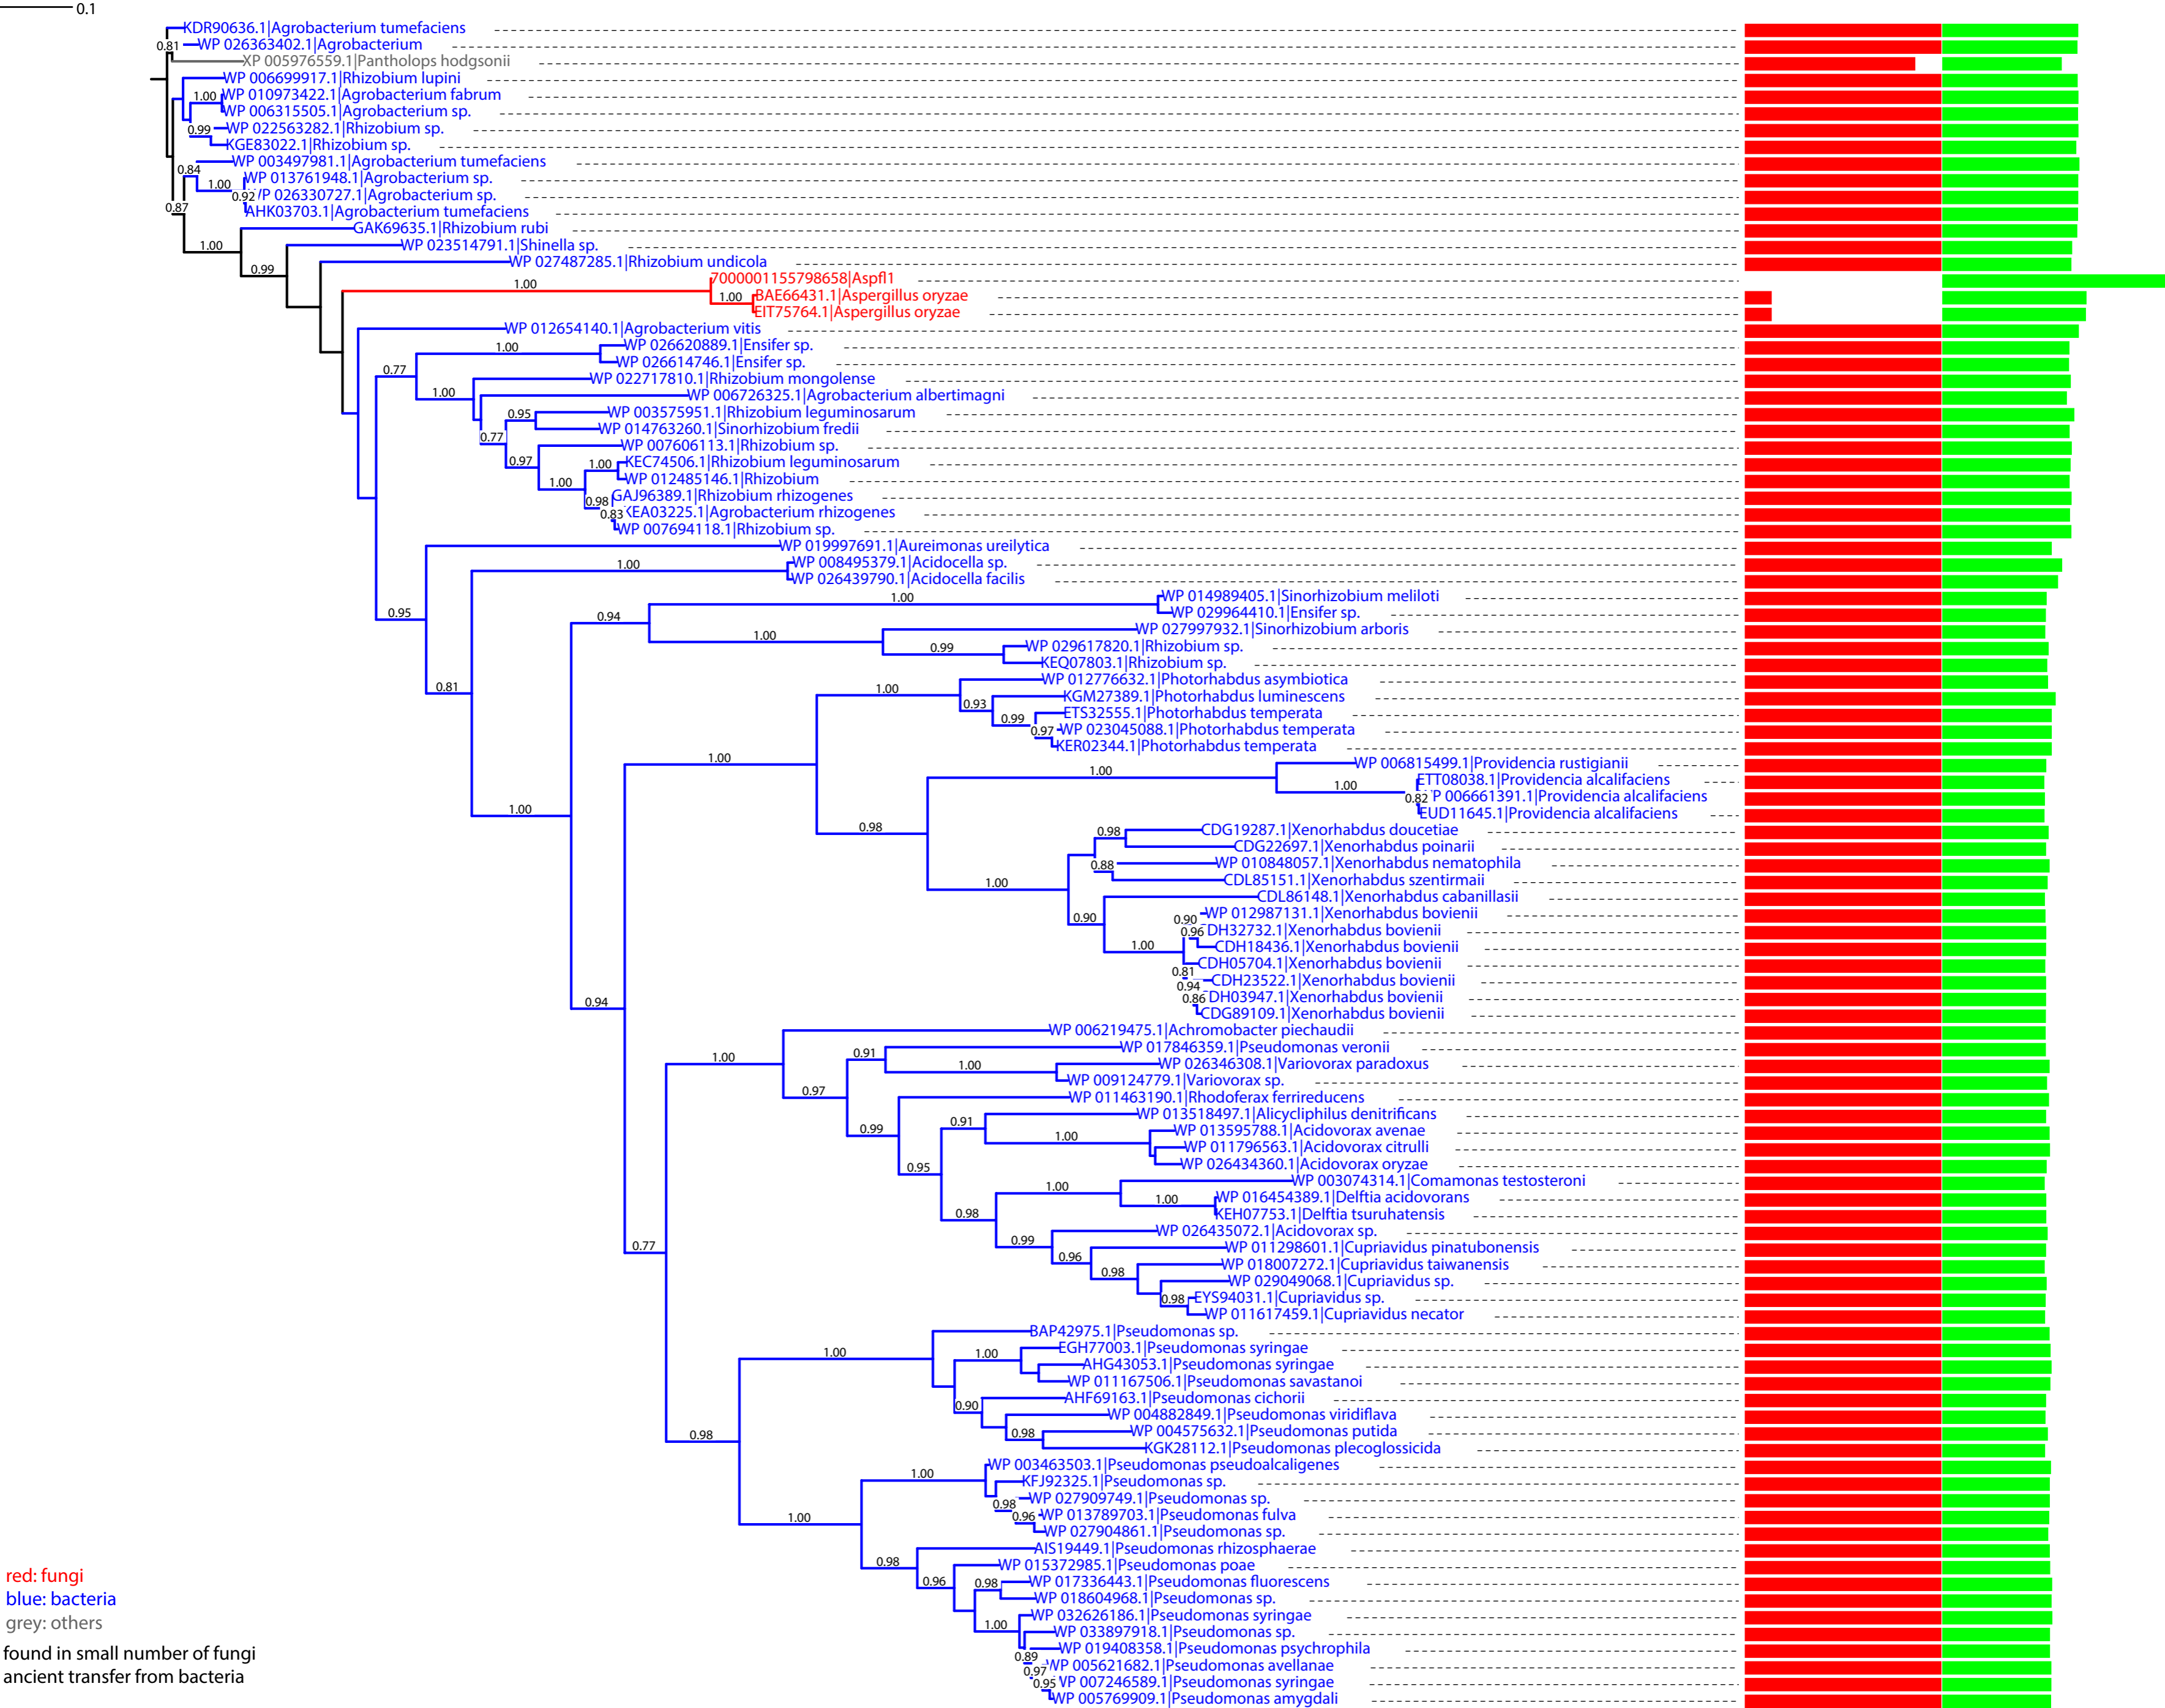

red: fungi  
blue: bacteria

found in small number of fungi  
ancient transfer from bacteria

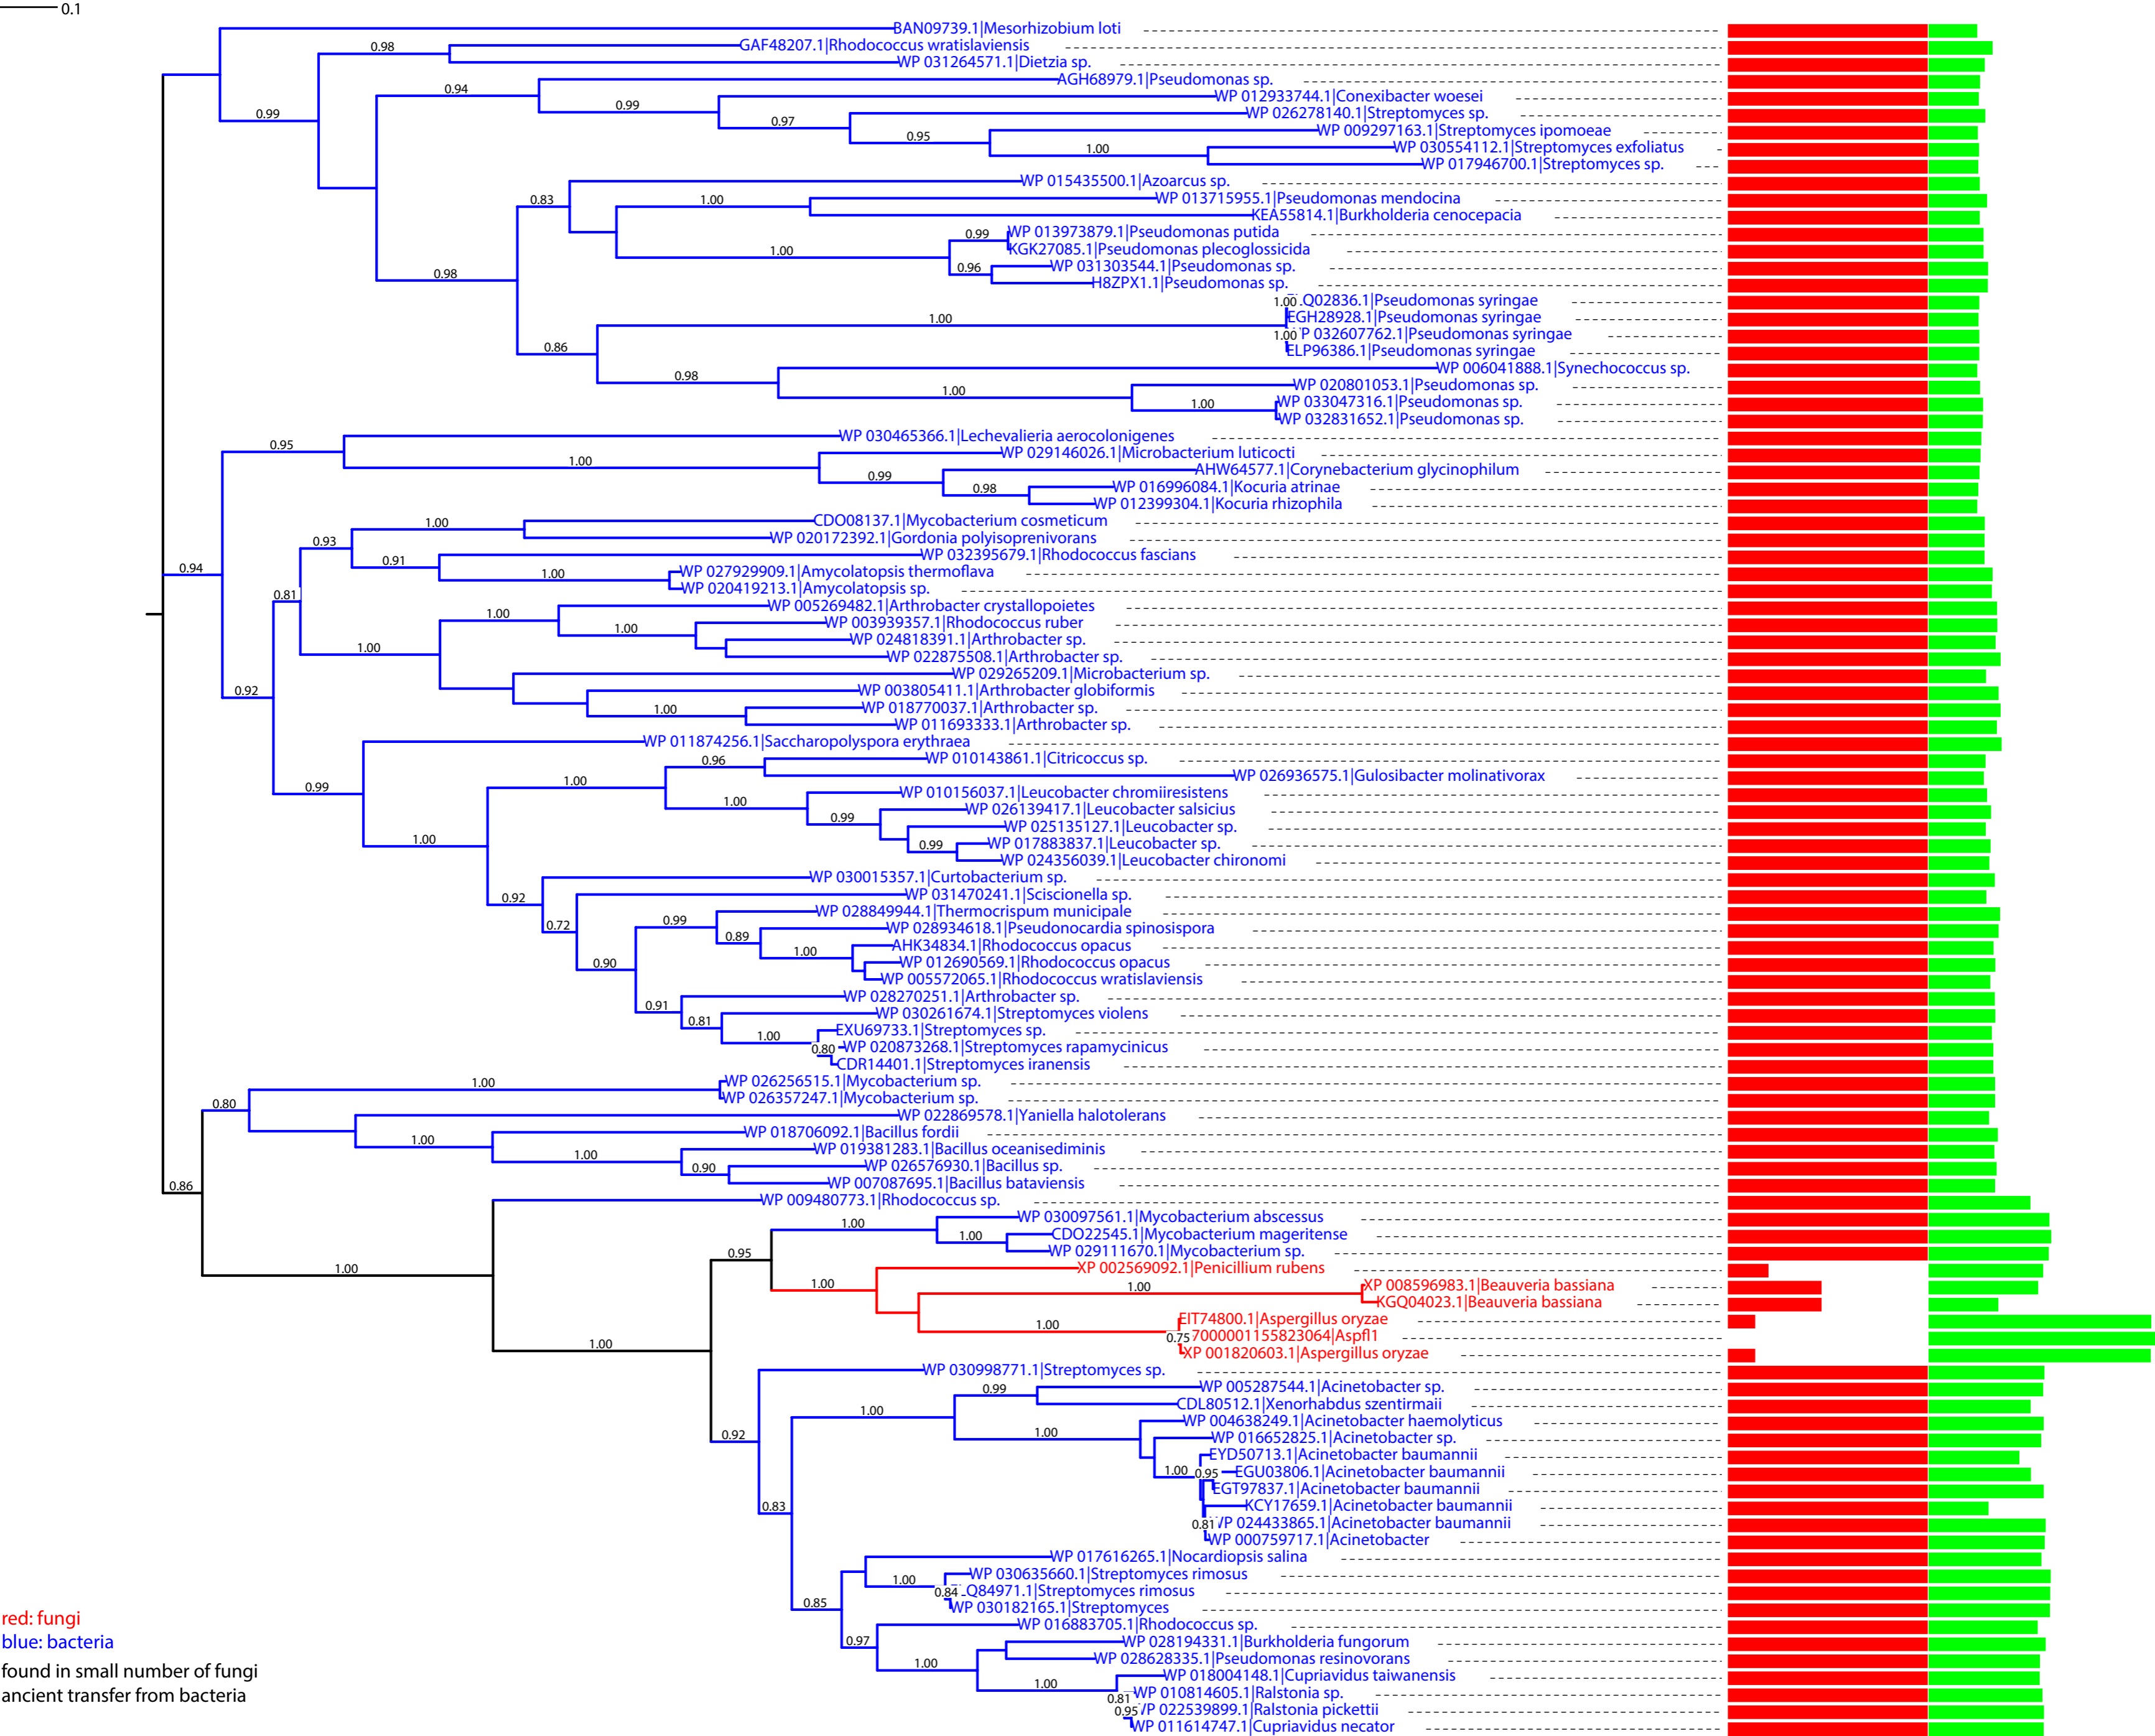

0.1

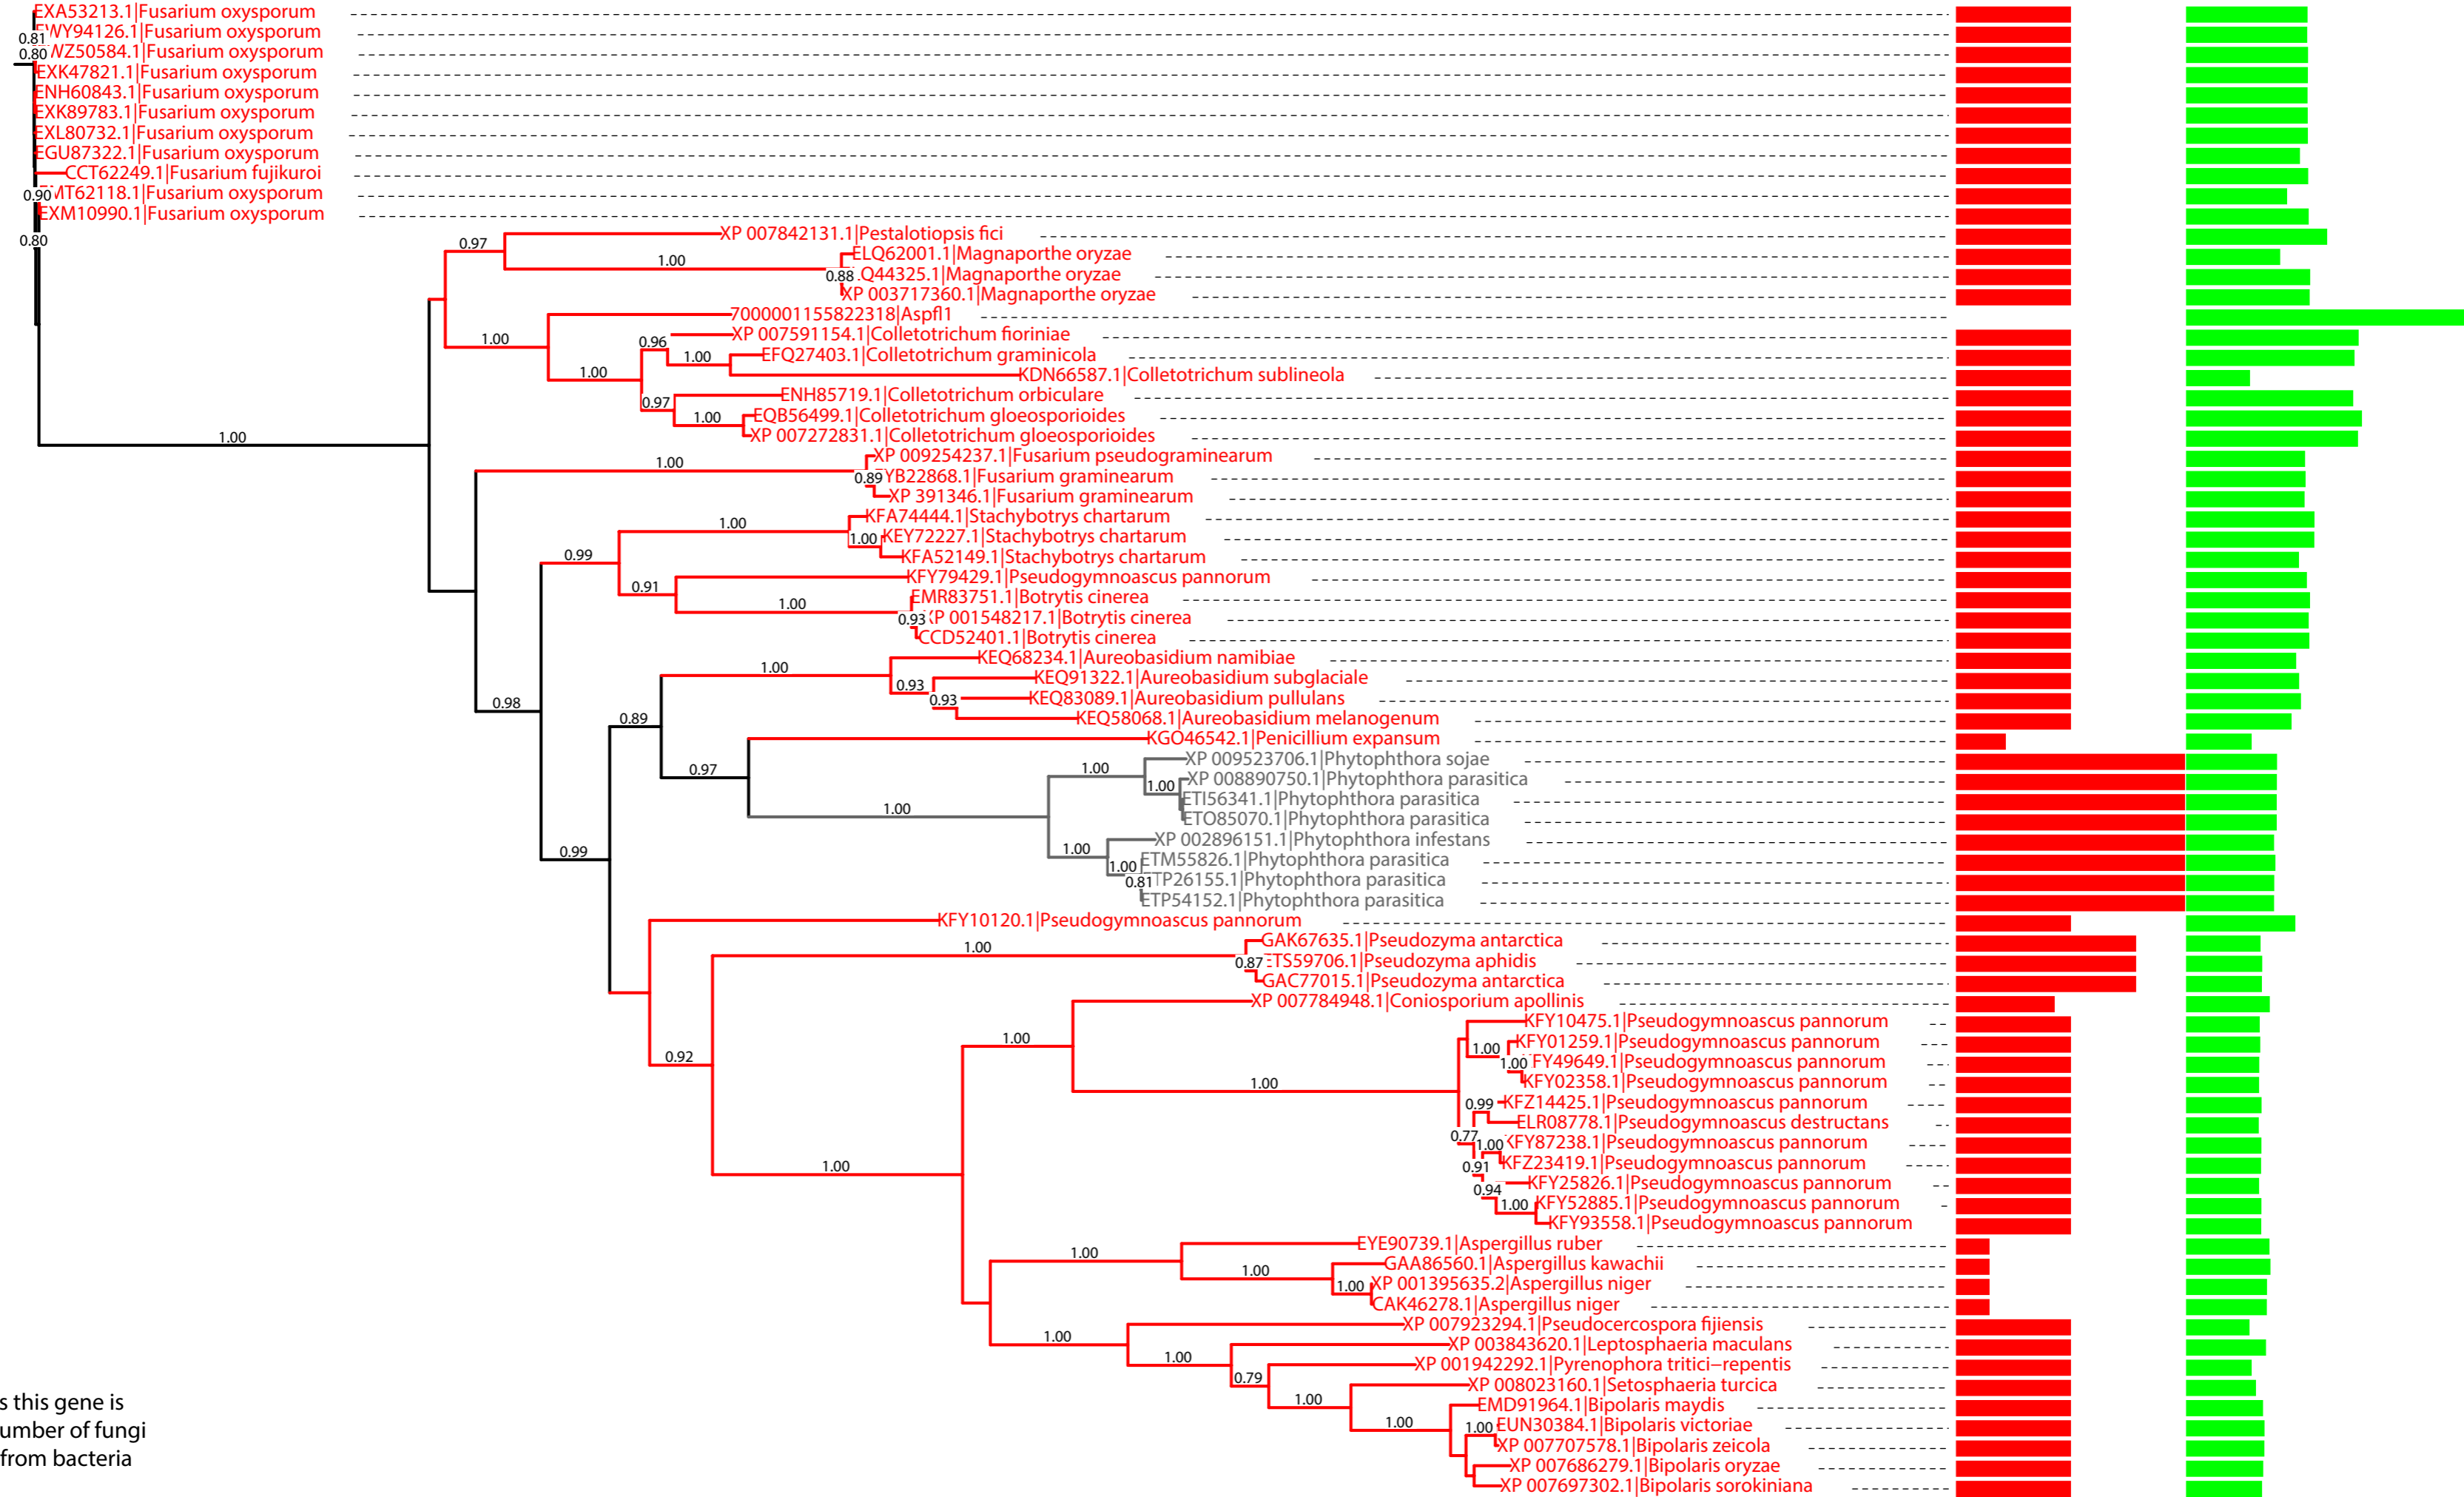

red: fungi  
grey: others

R > 0.2 set shows this gene is  
found in small number of fungi  
ancient transfer from bacteria

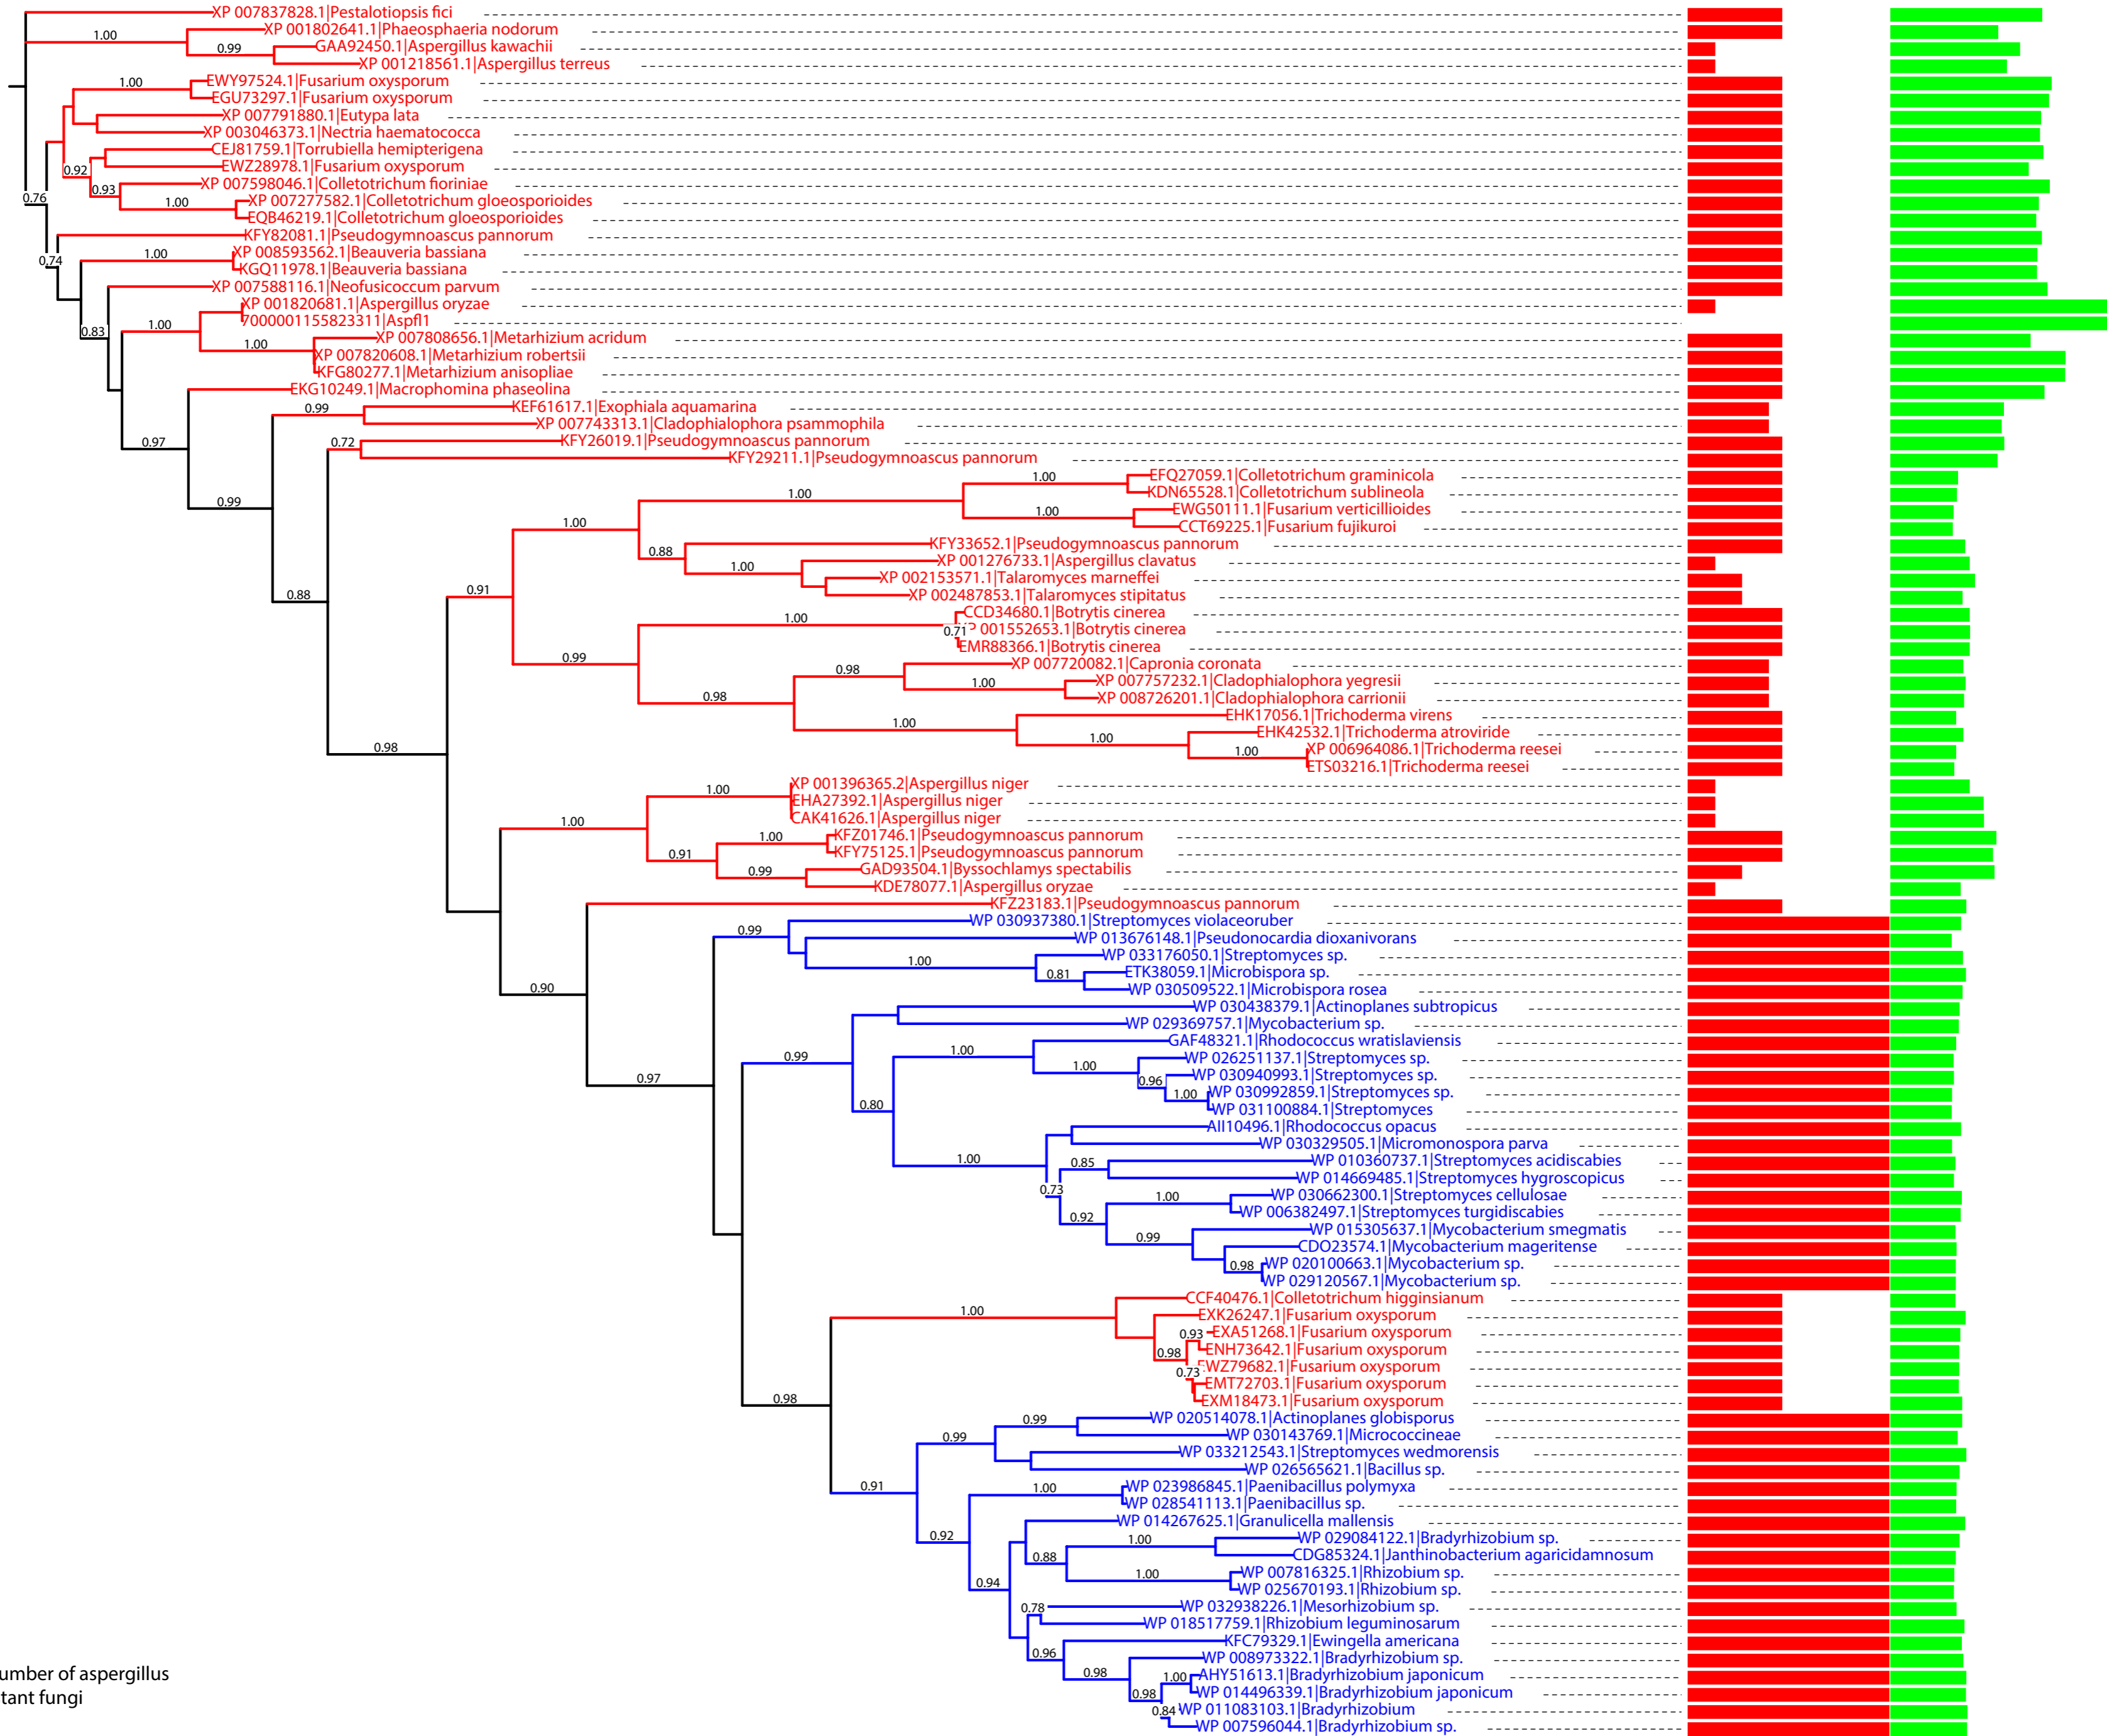

red: fungi  
blue: bacteria  
found in small number of aspergillus  
transfer from distant fungi

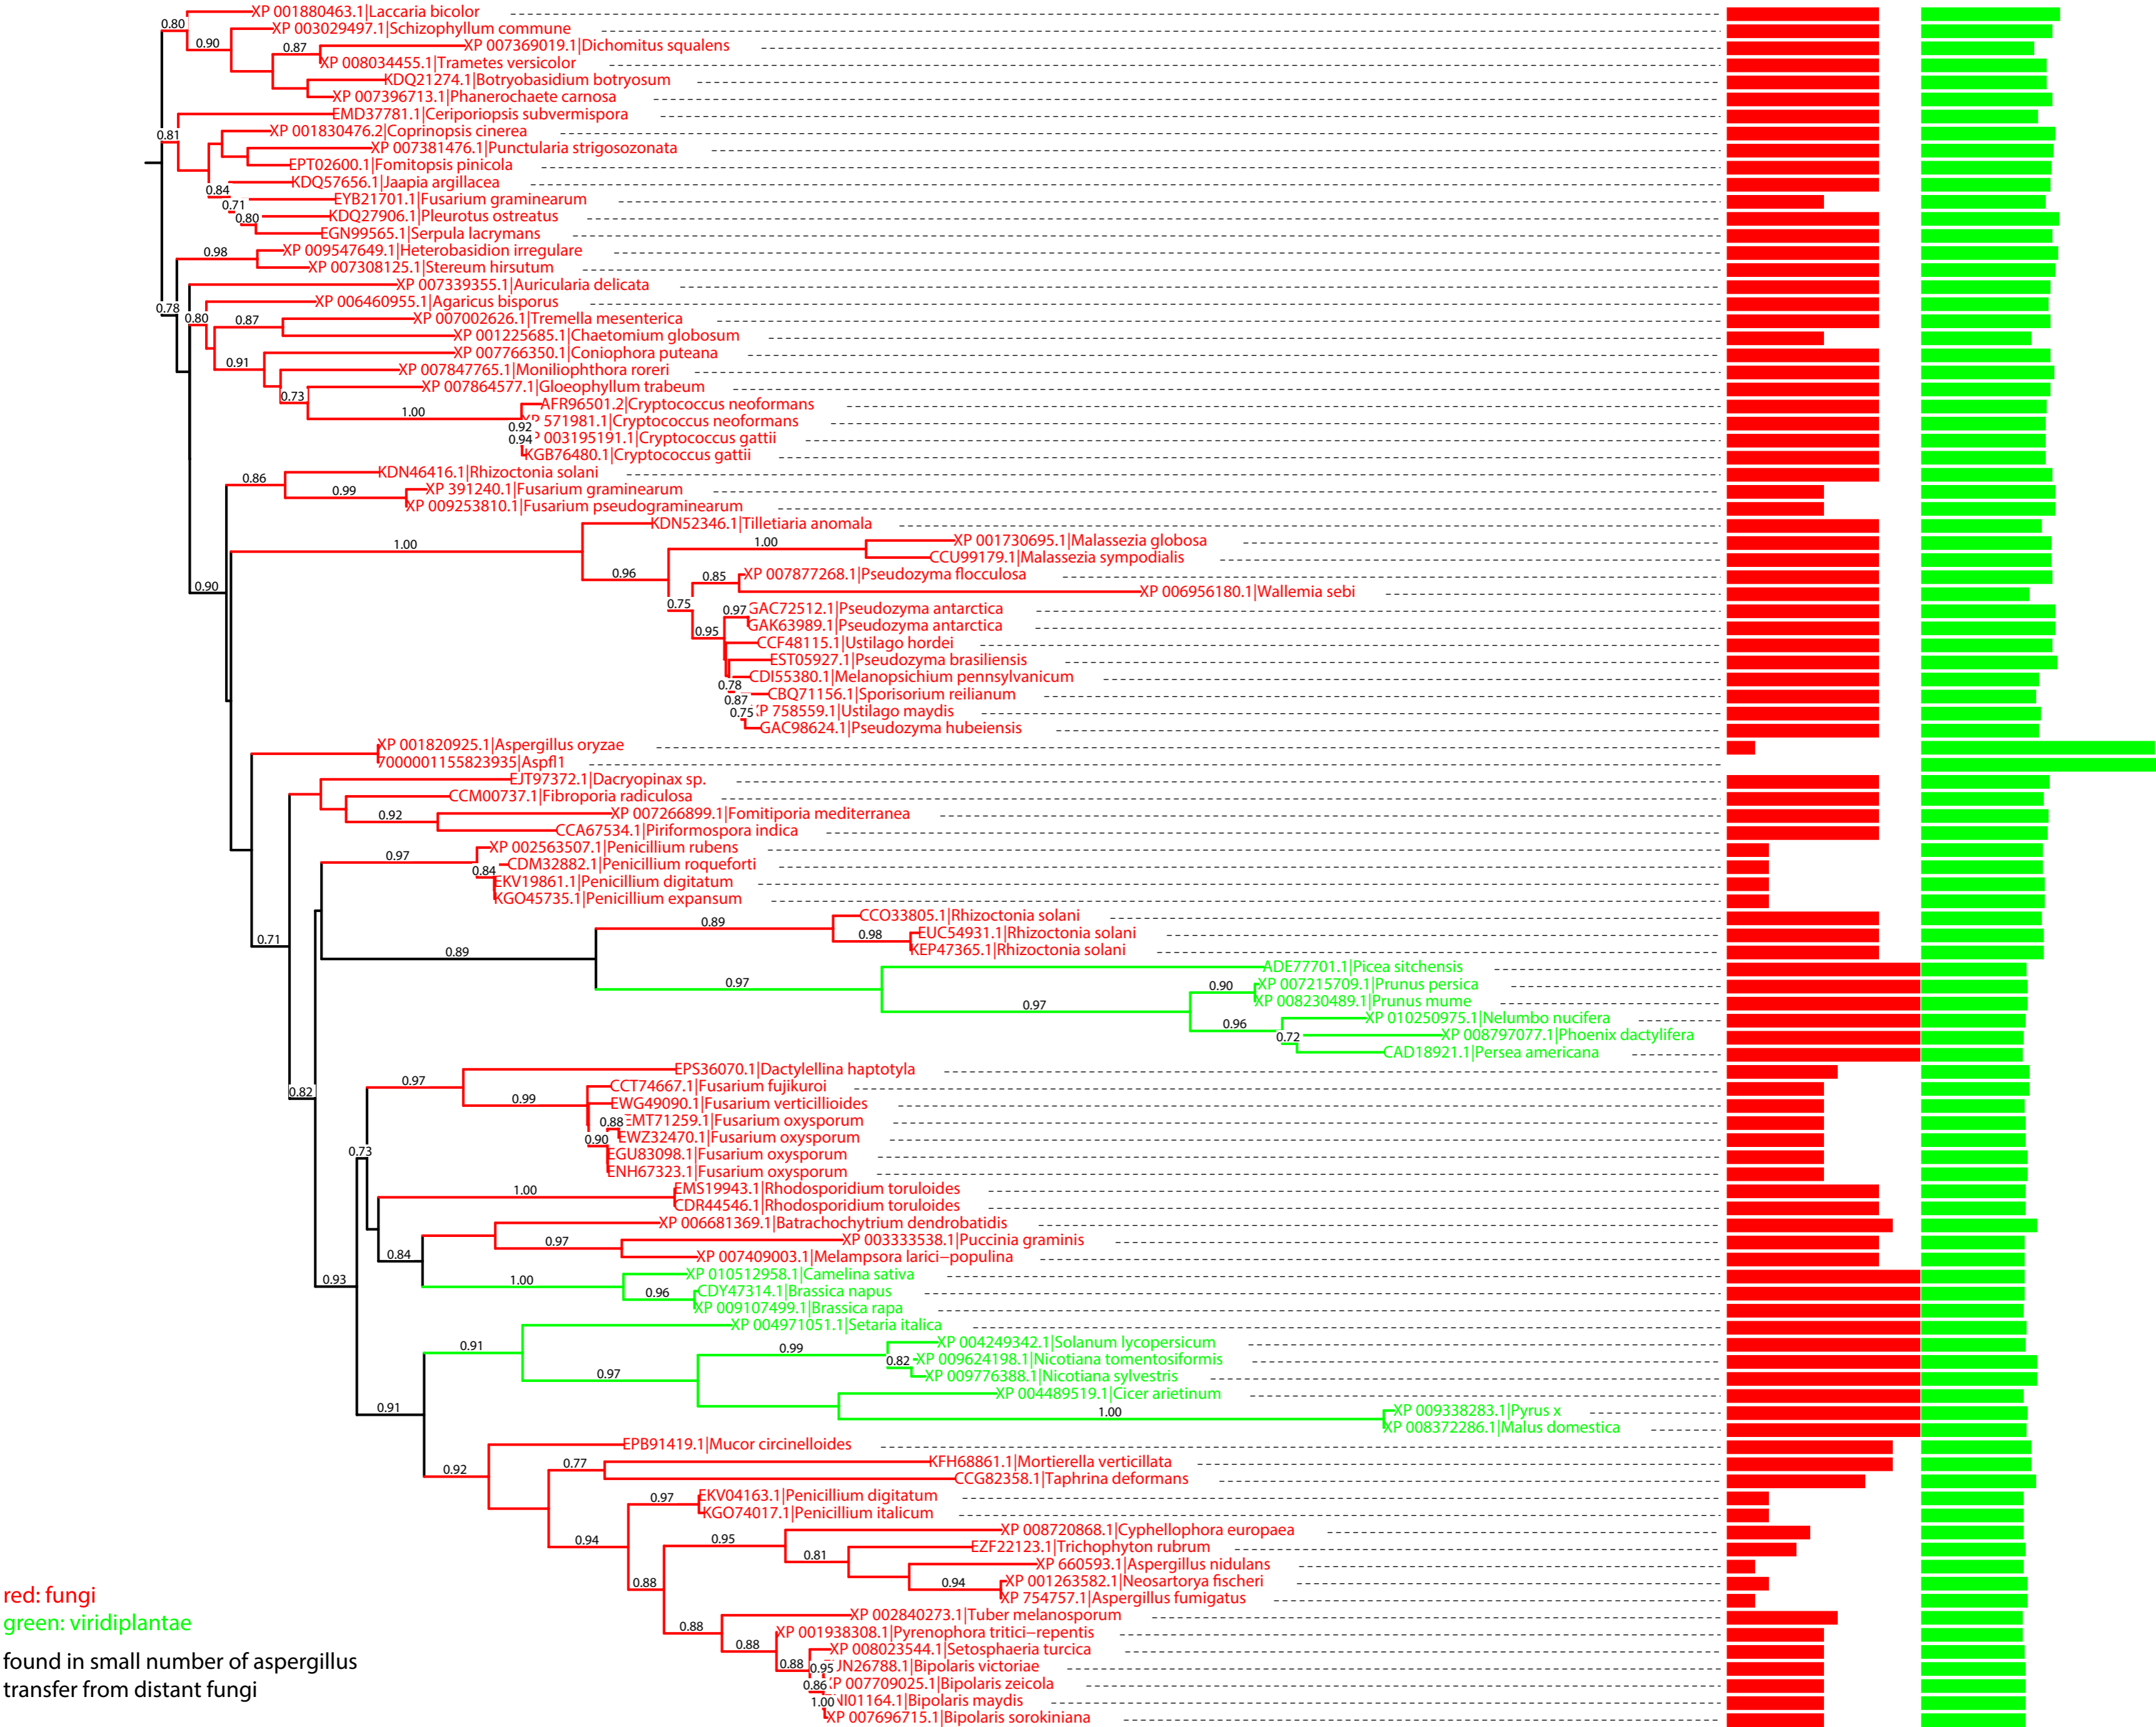

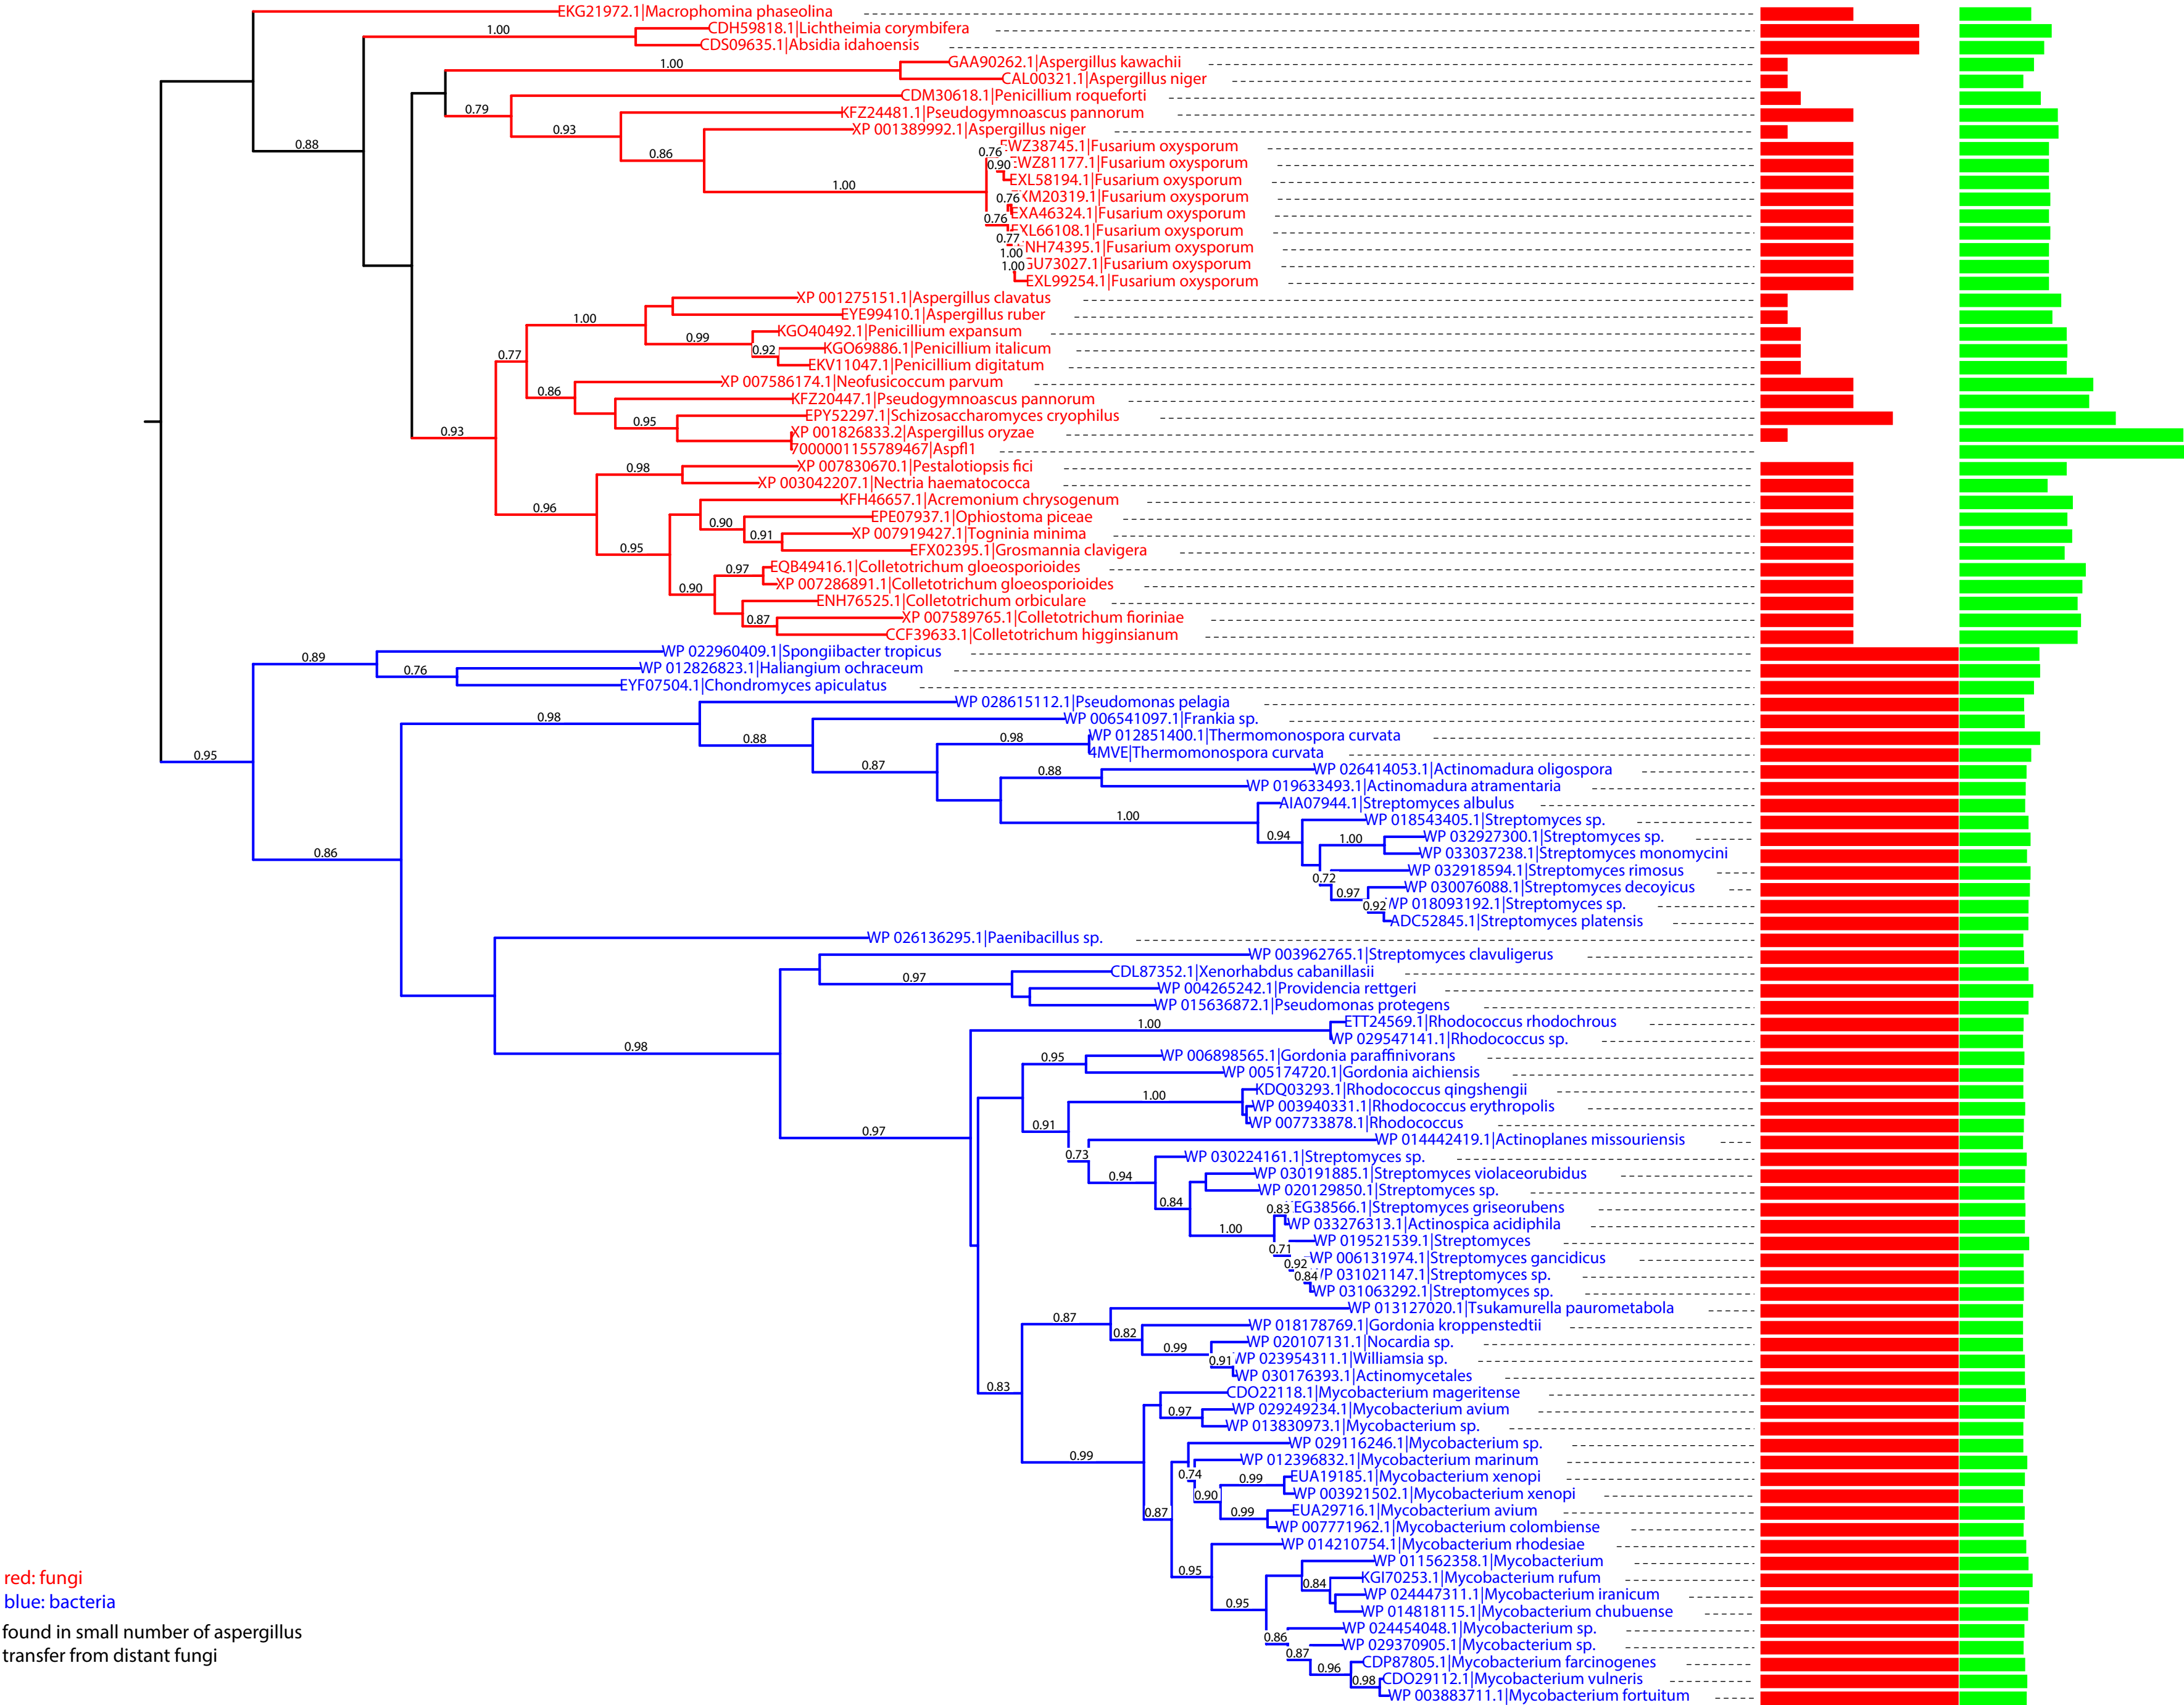

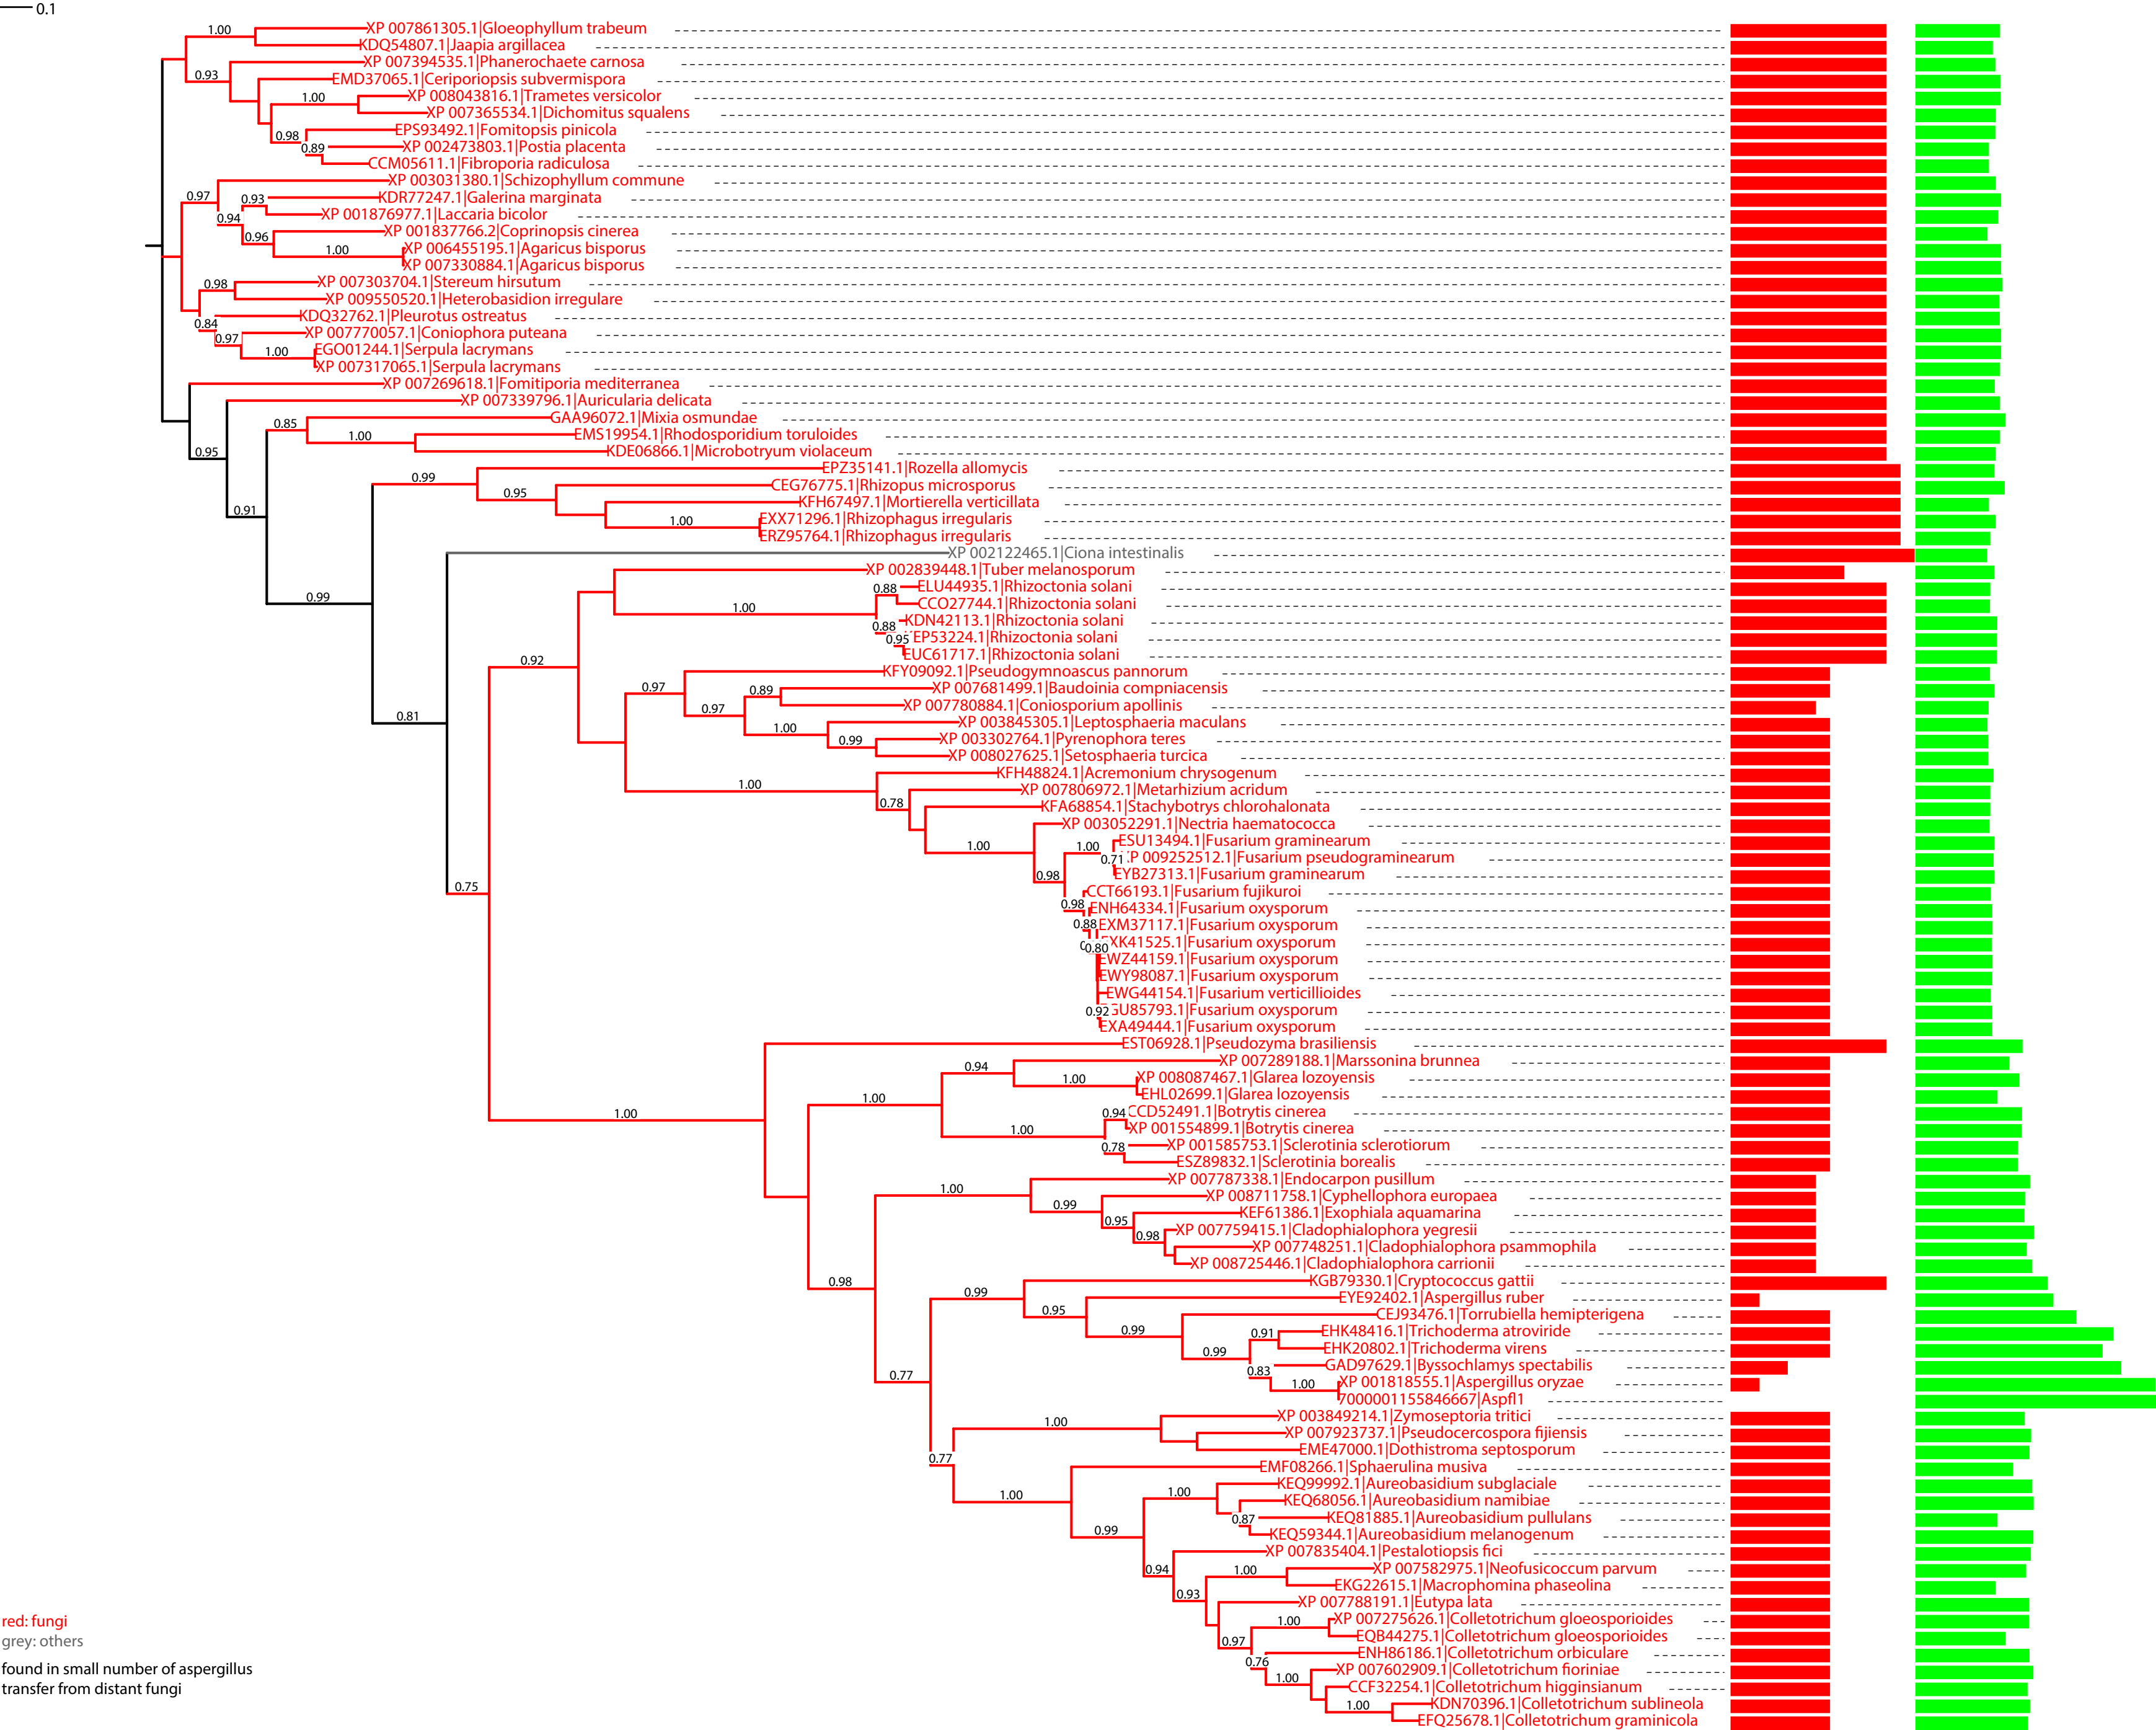

red: fungi  
found in small number of aspergillus  
transfer from distant fungi

0.1

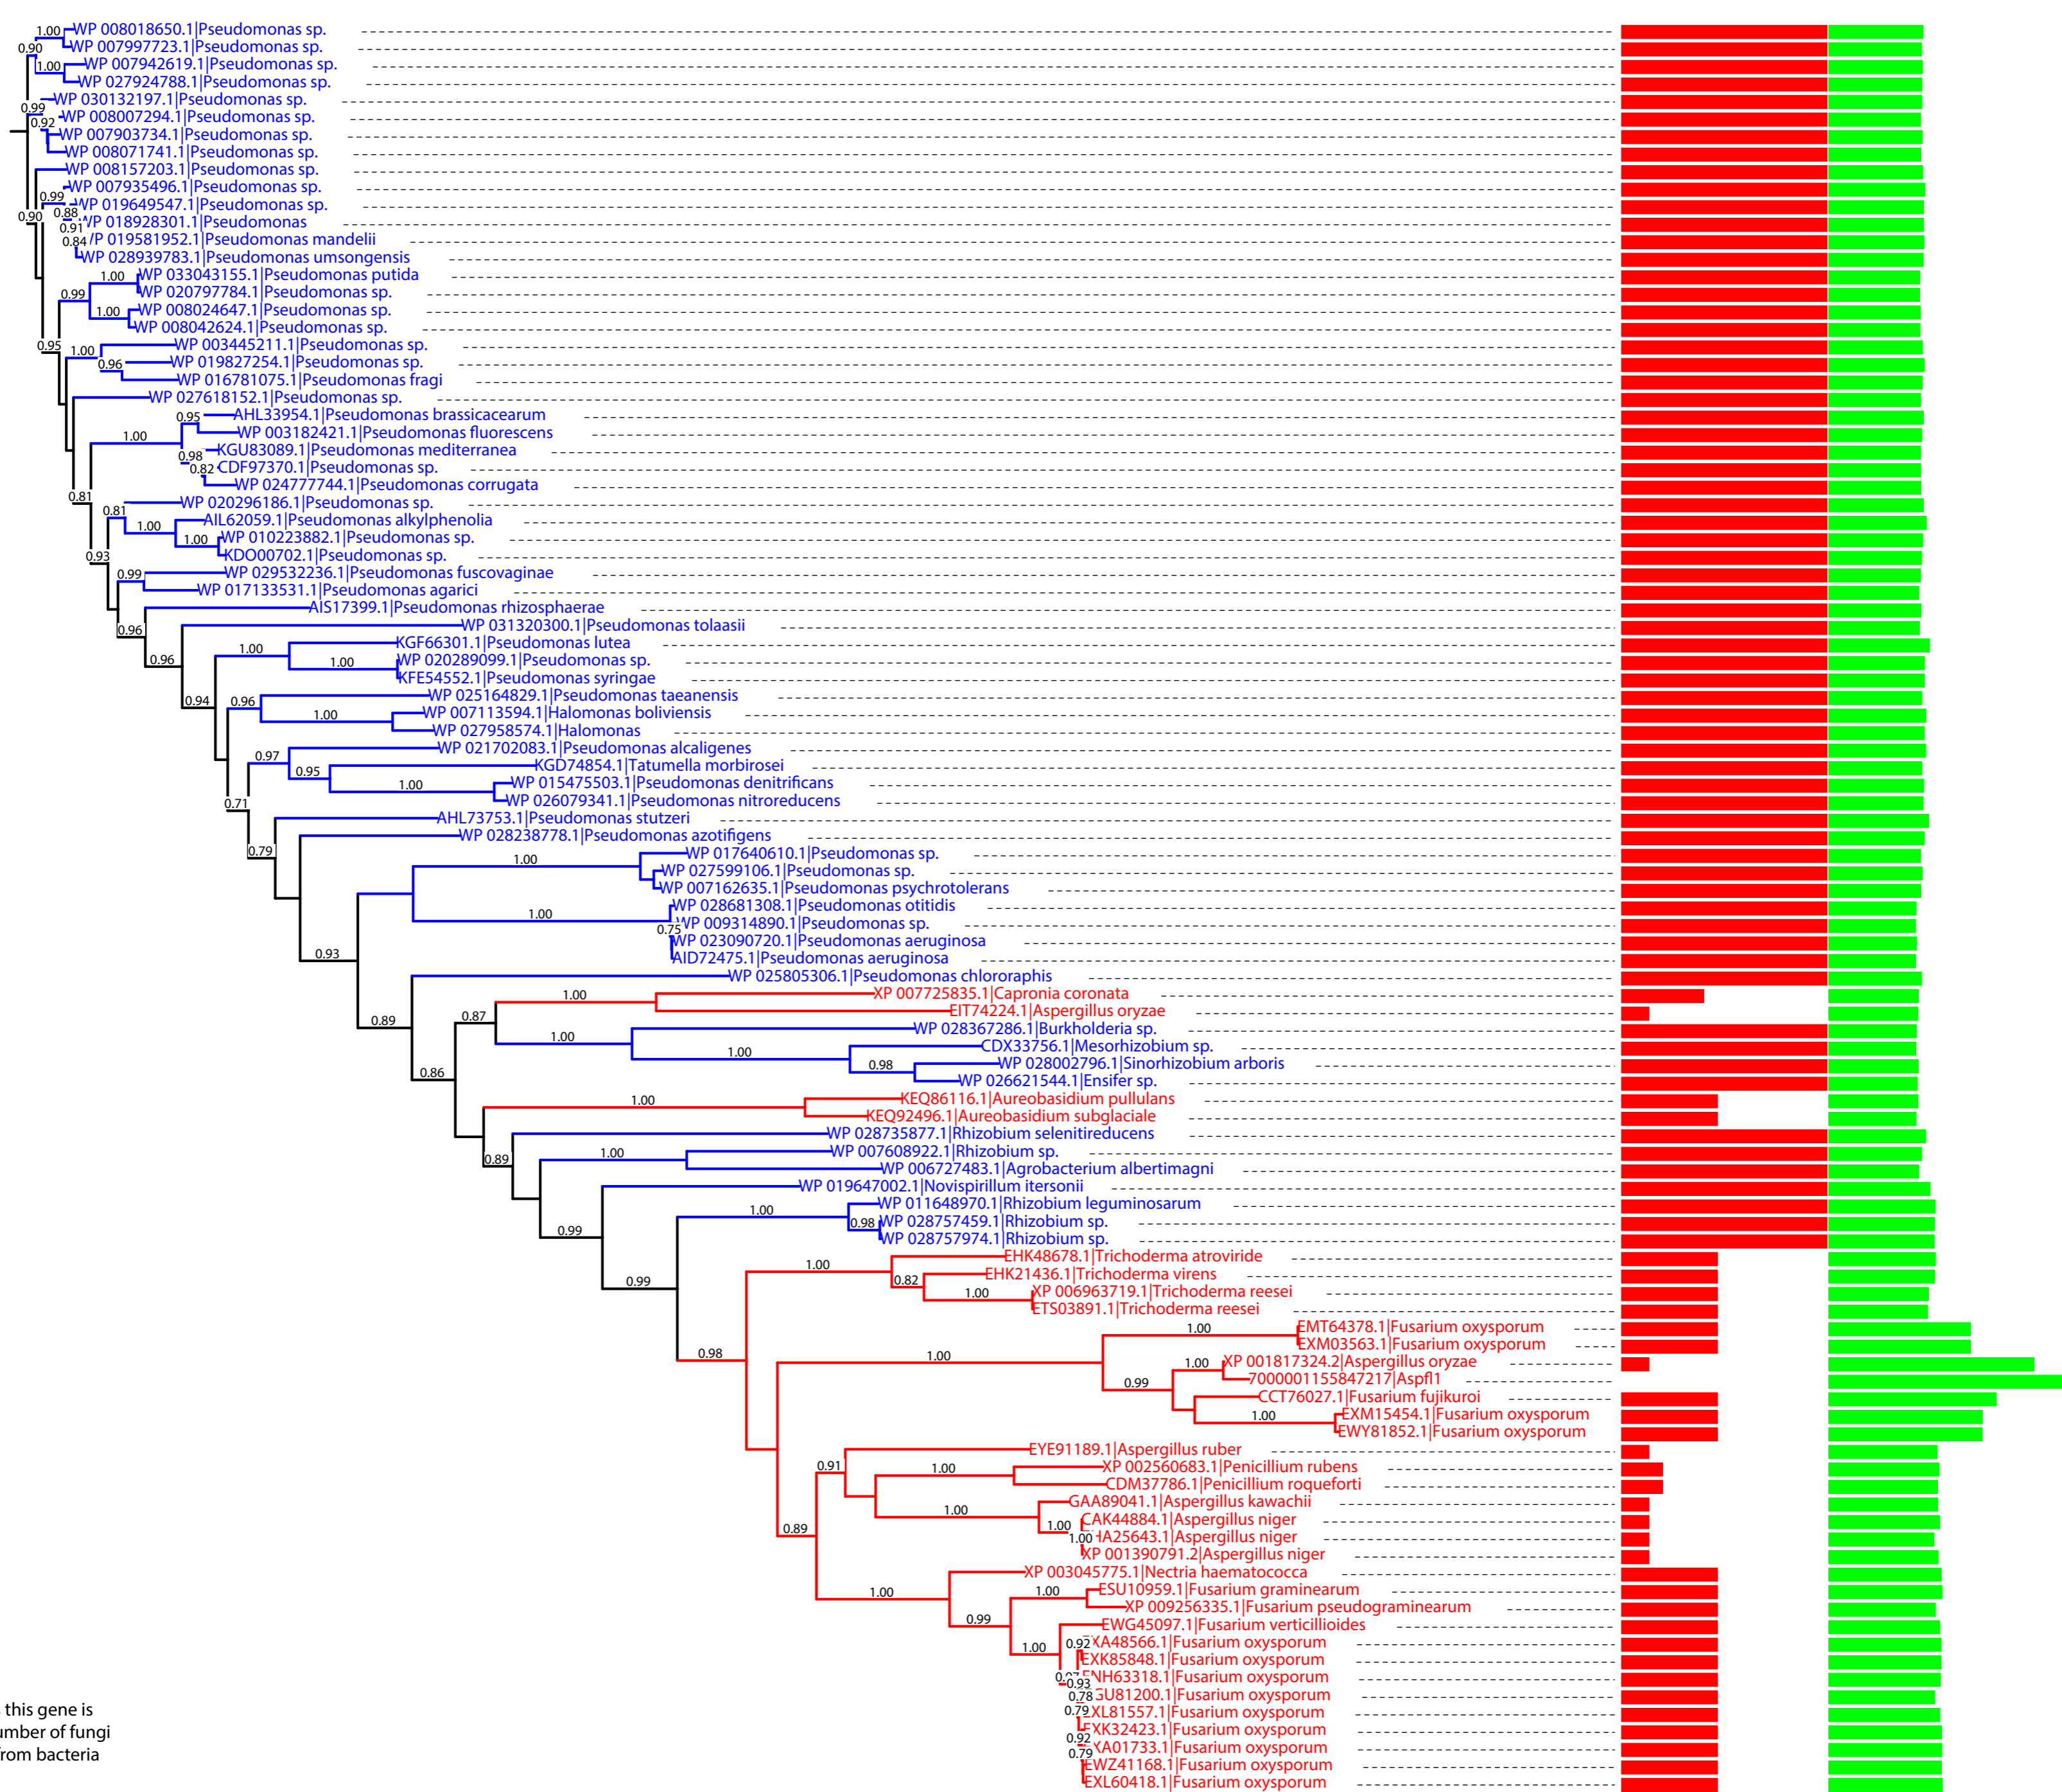

0.1

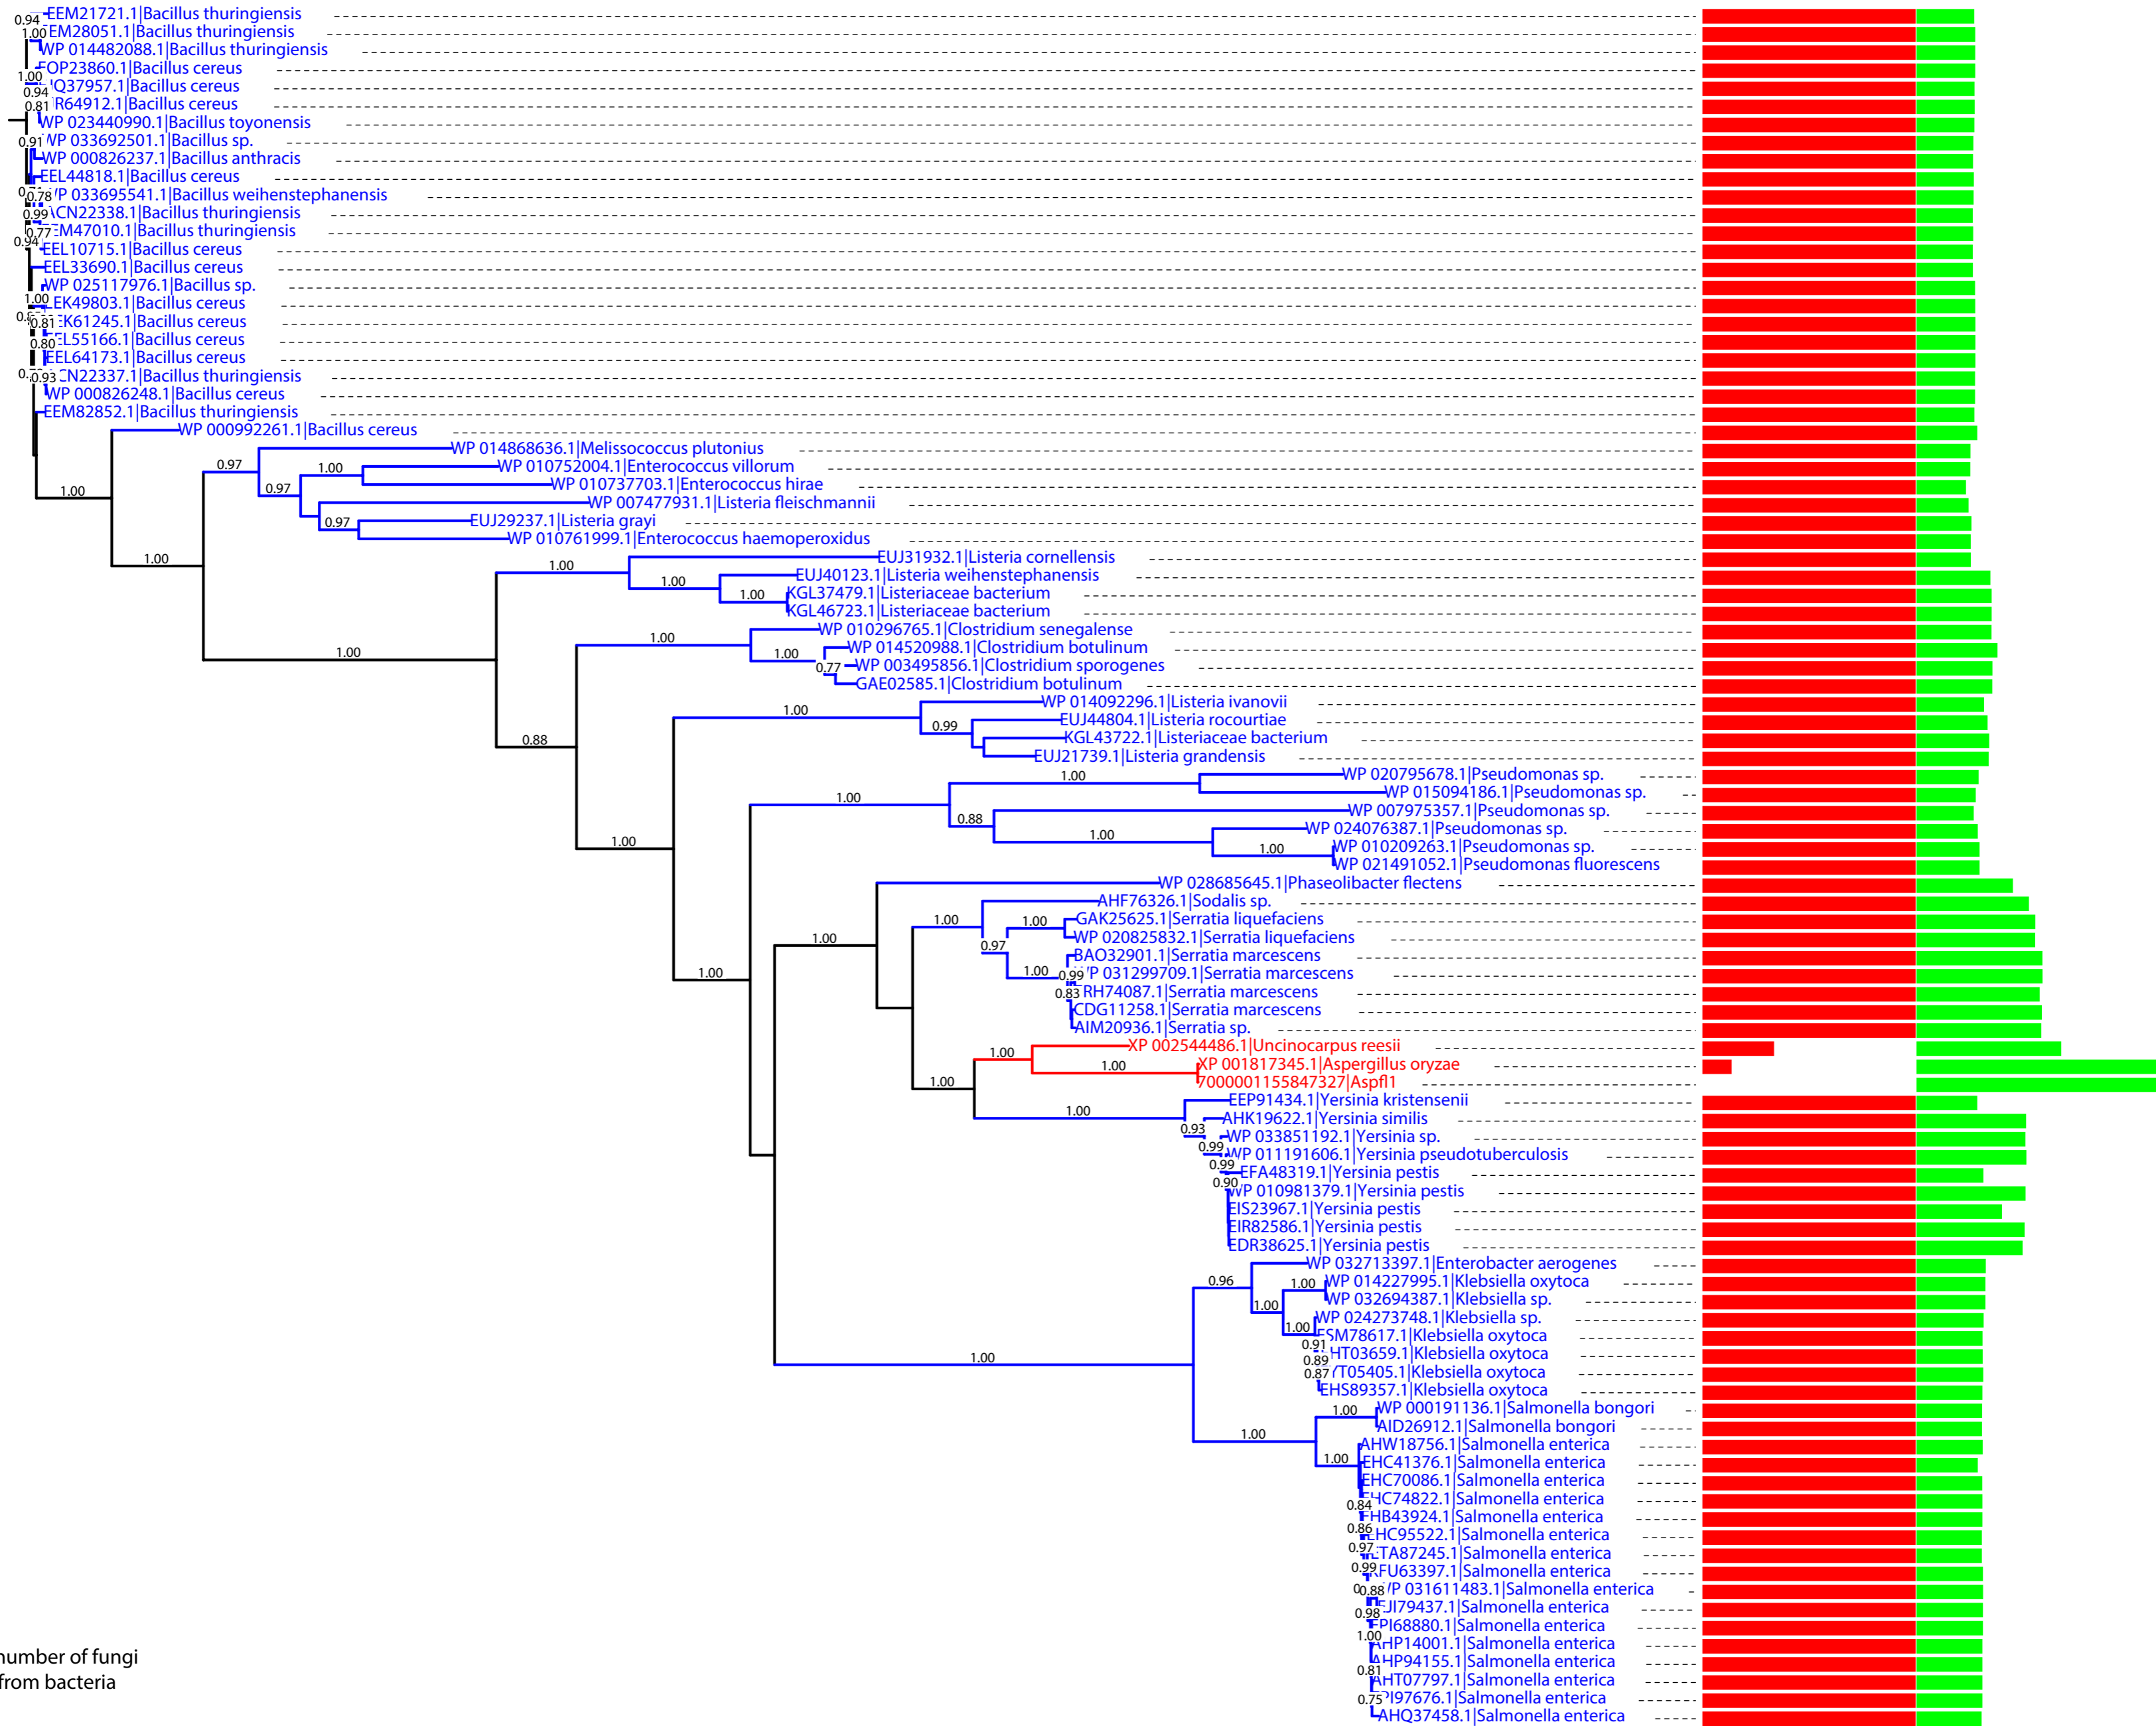

red: fungi

blue: bacteria

found in small number of fungi

recent transfer from bacteria

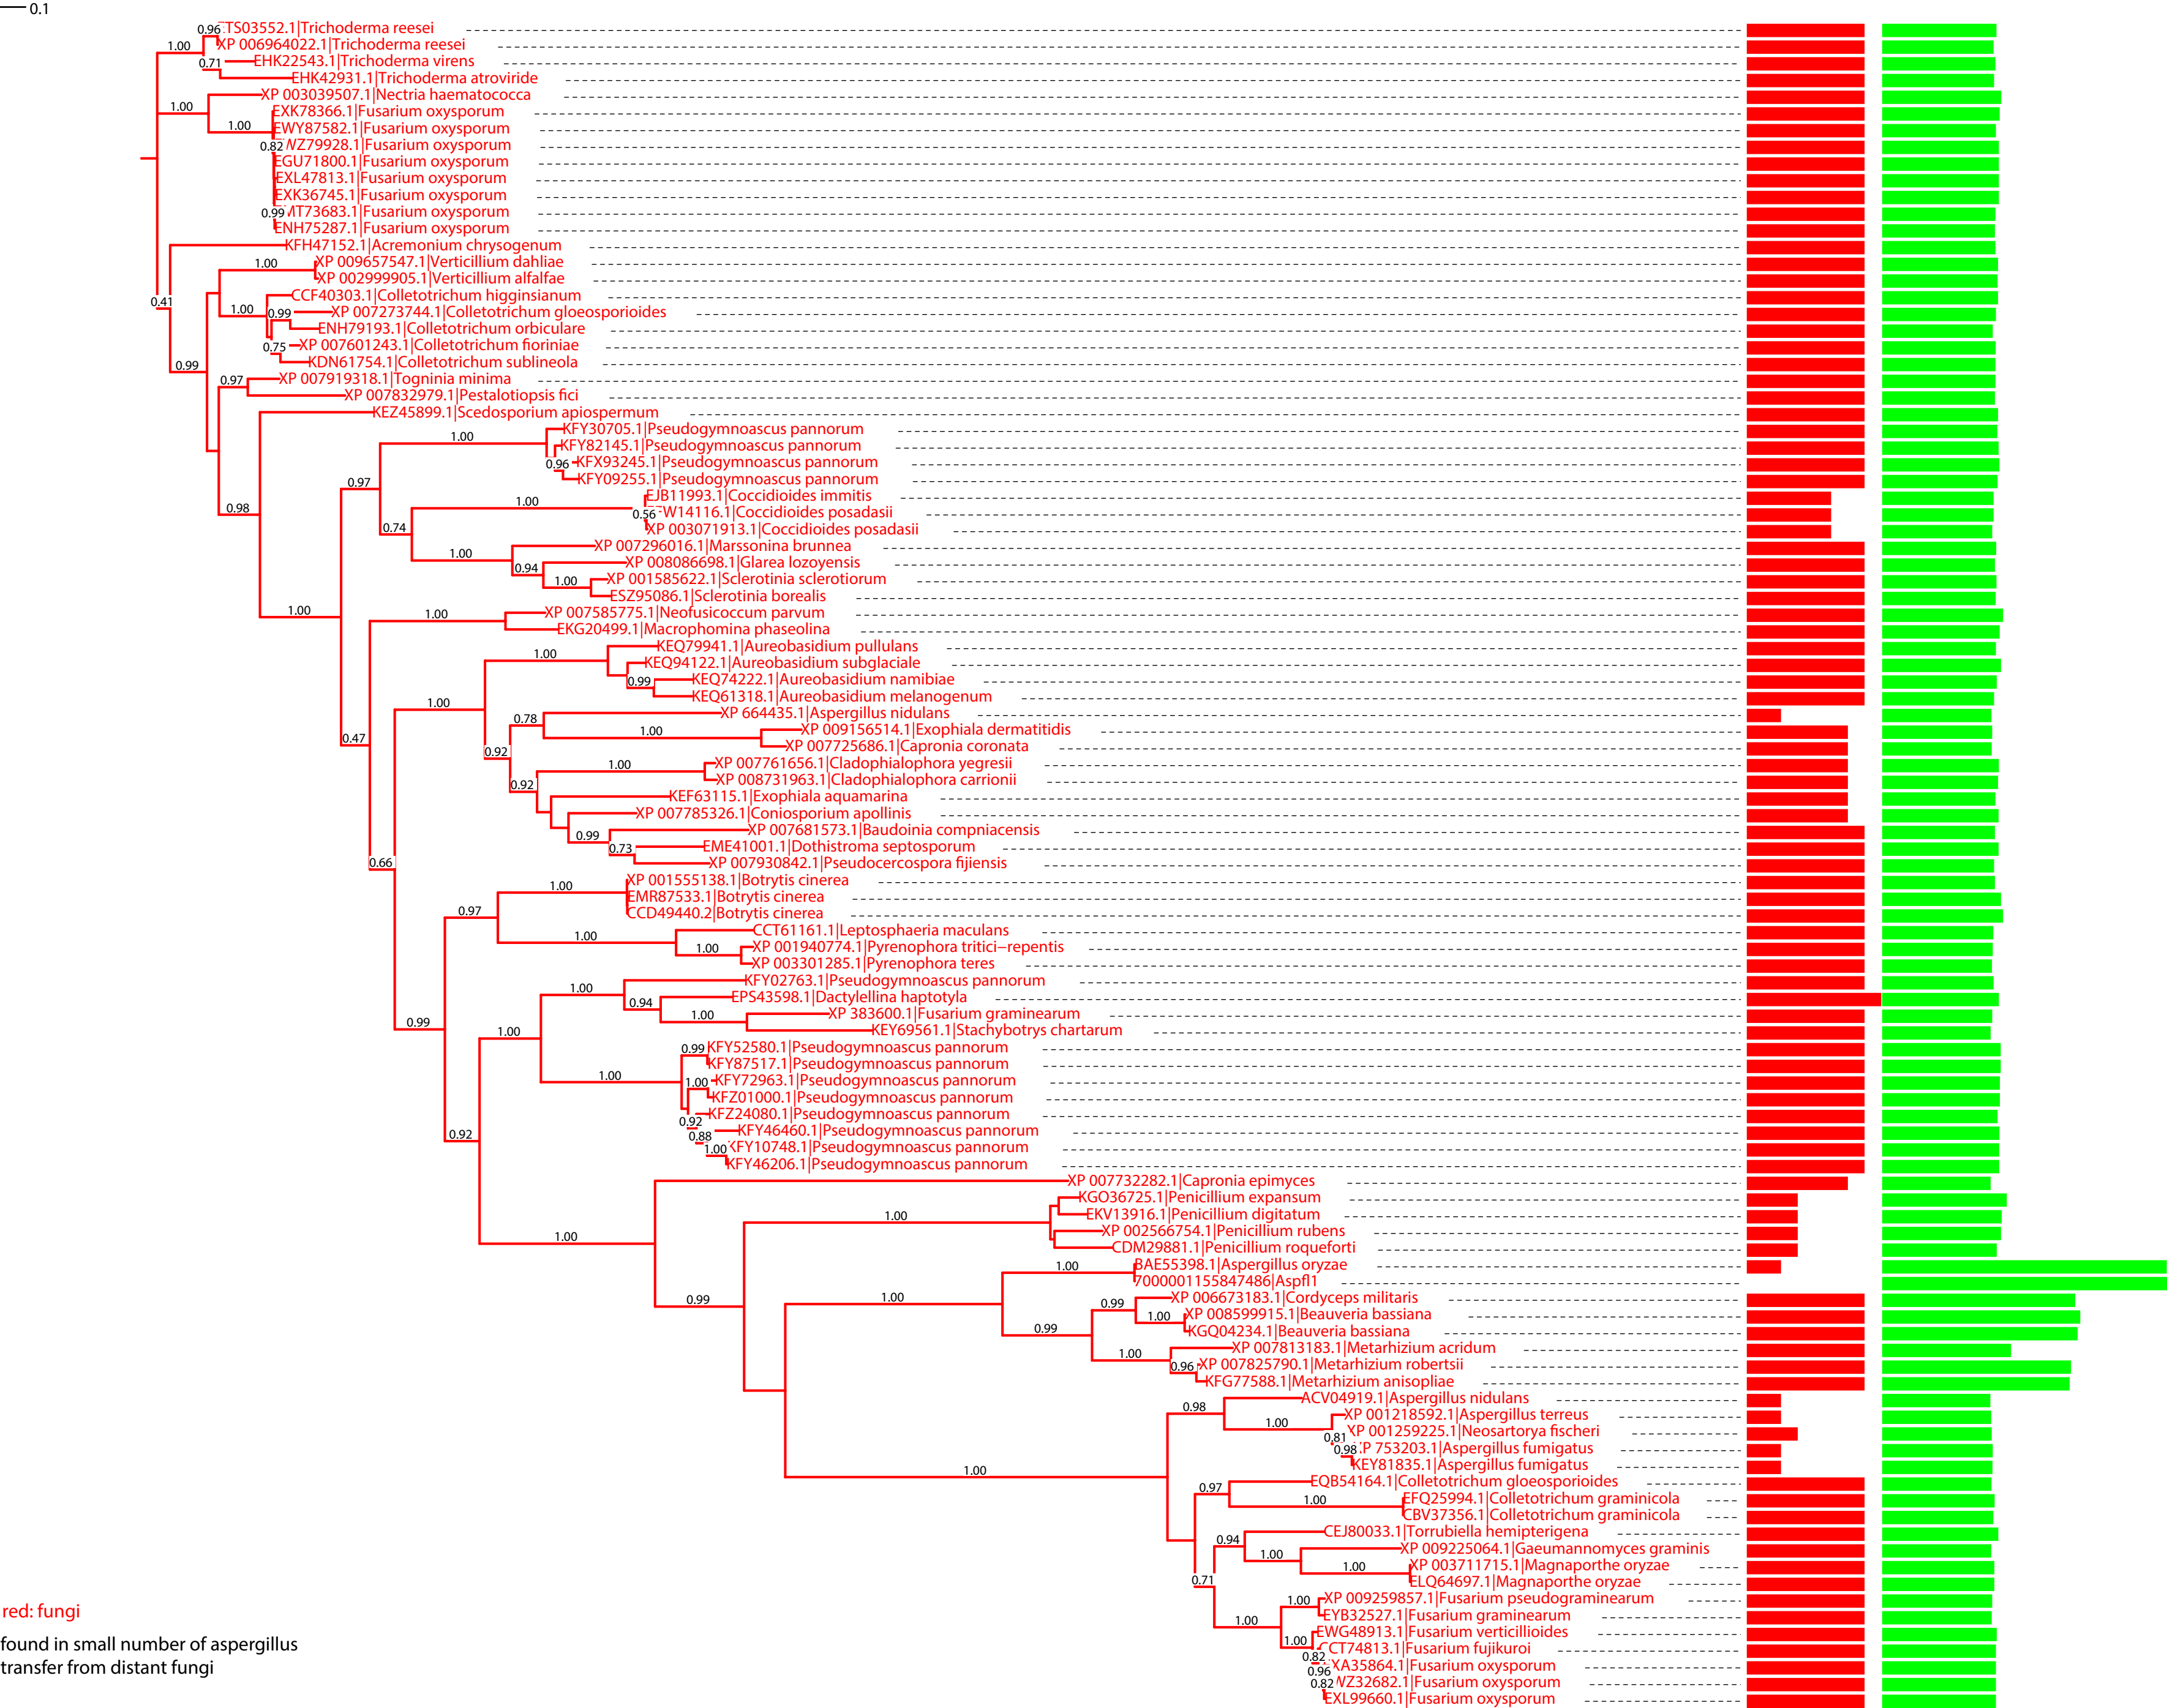

0.1

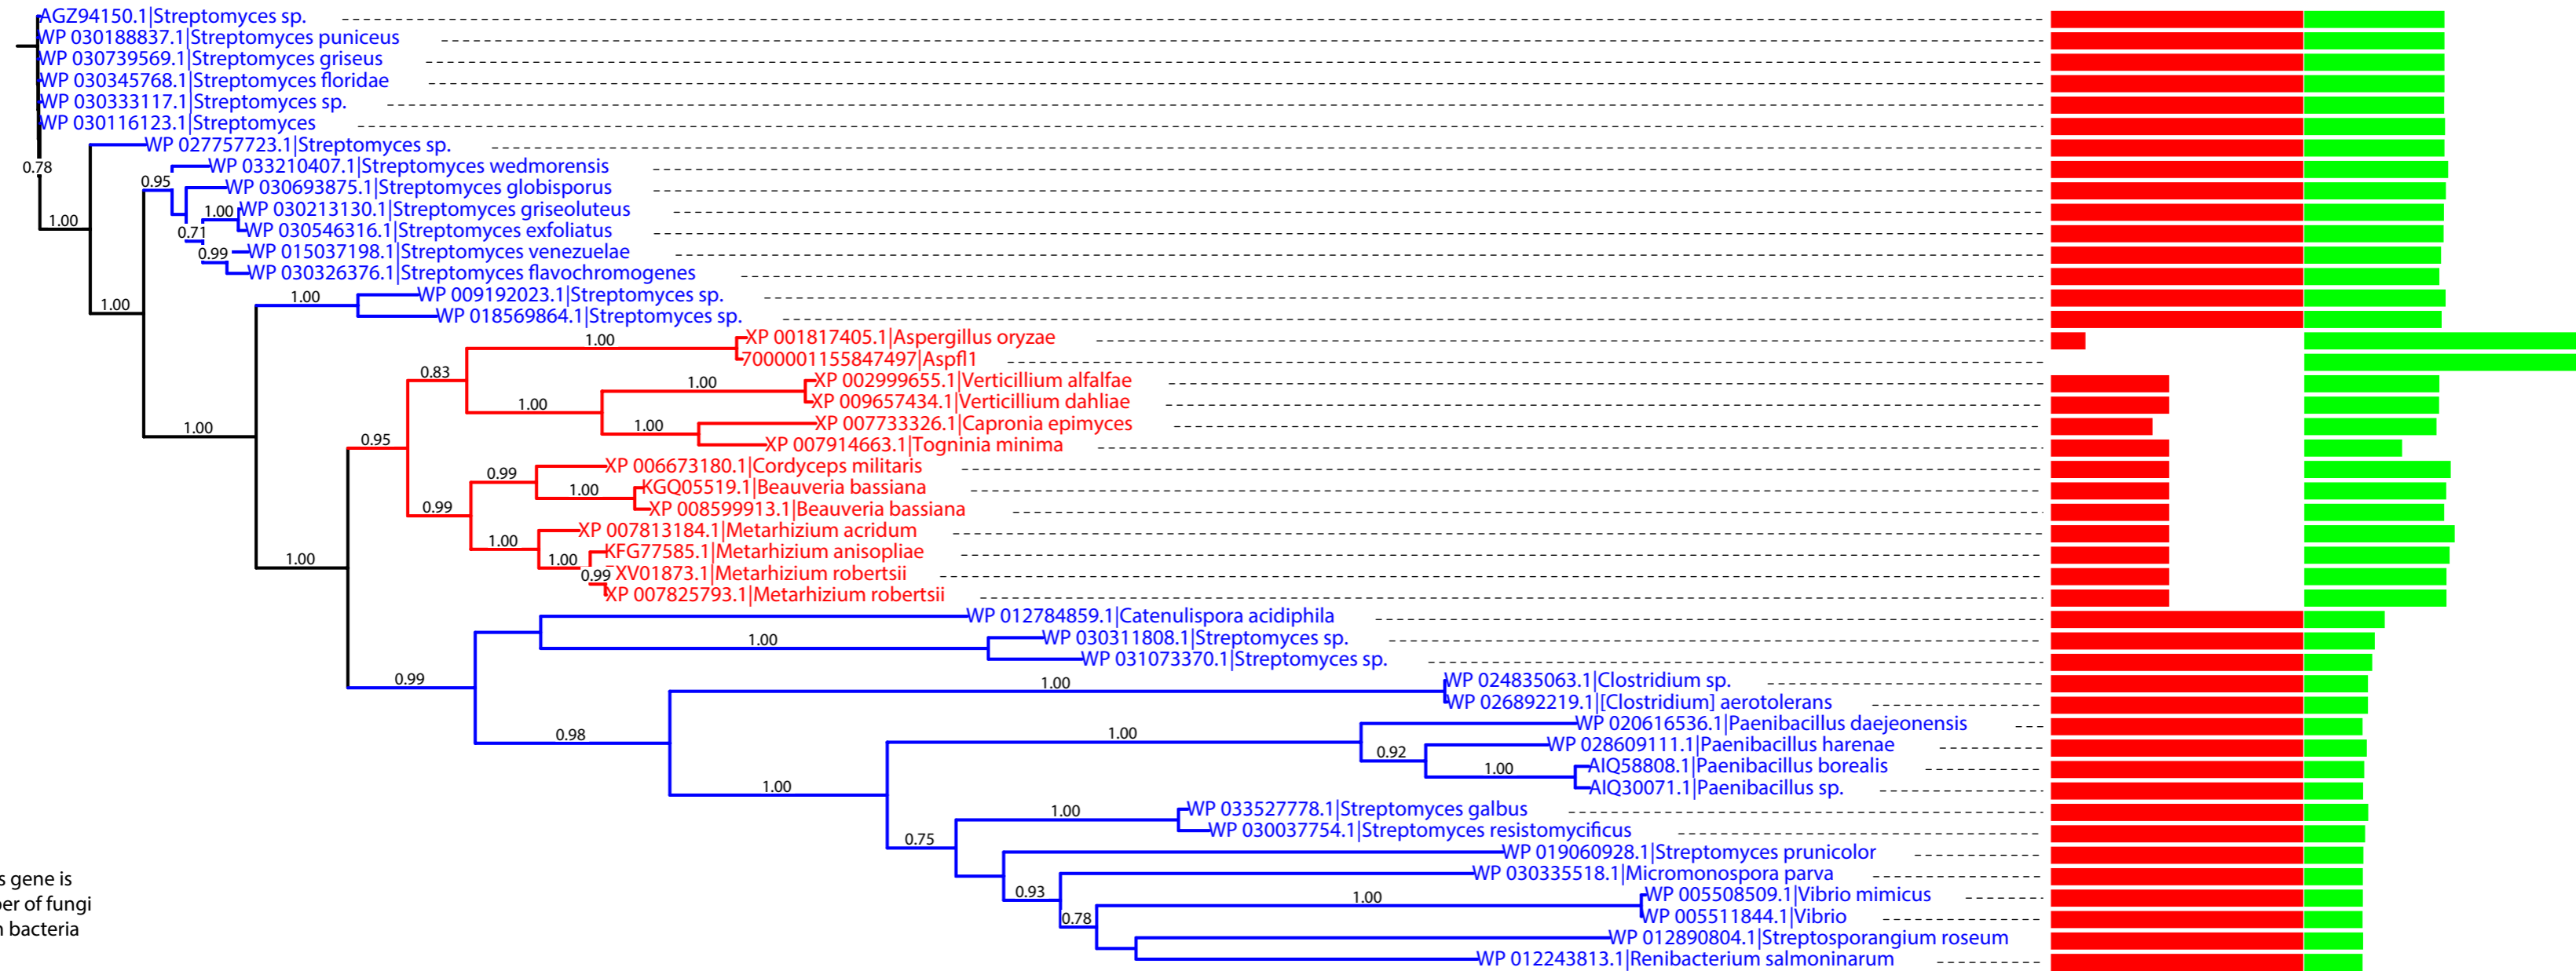

red: fungi  
blue: bacteria  
R > 0.2 set shows this gene is  
found in small number of fungi  
ancient transfer from bacteria

0.1

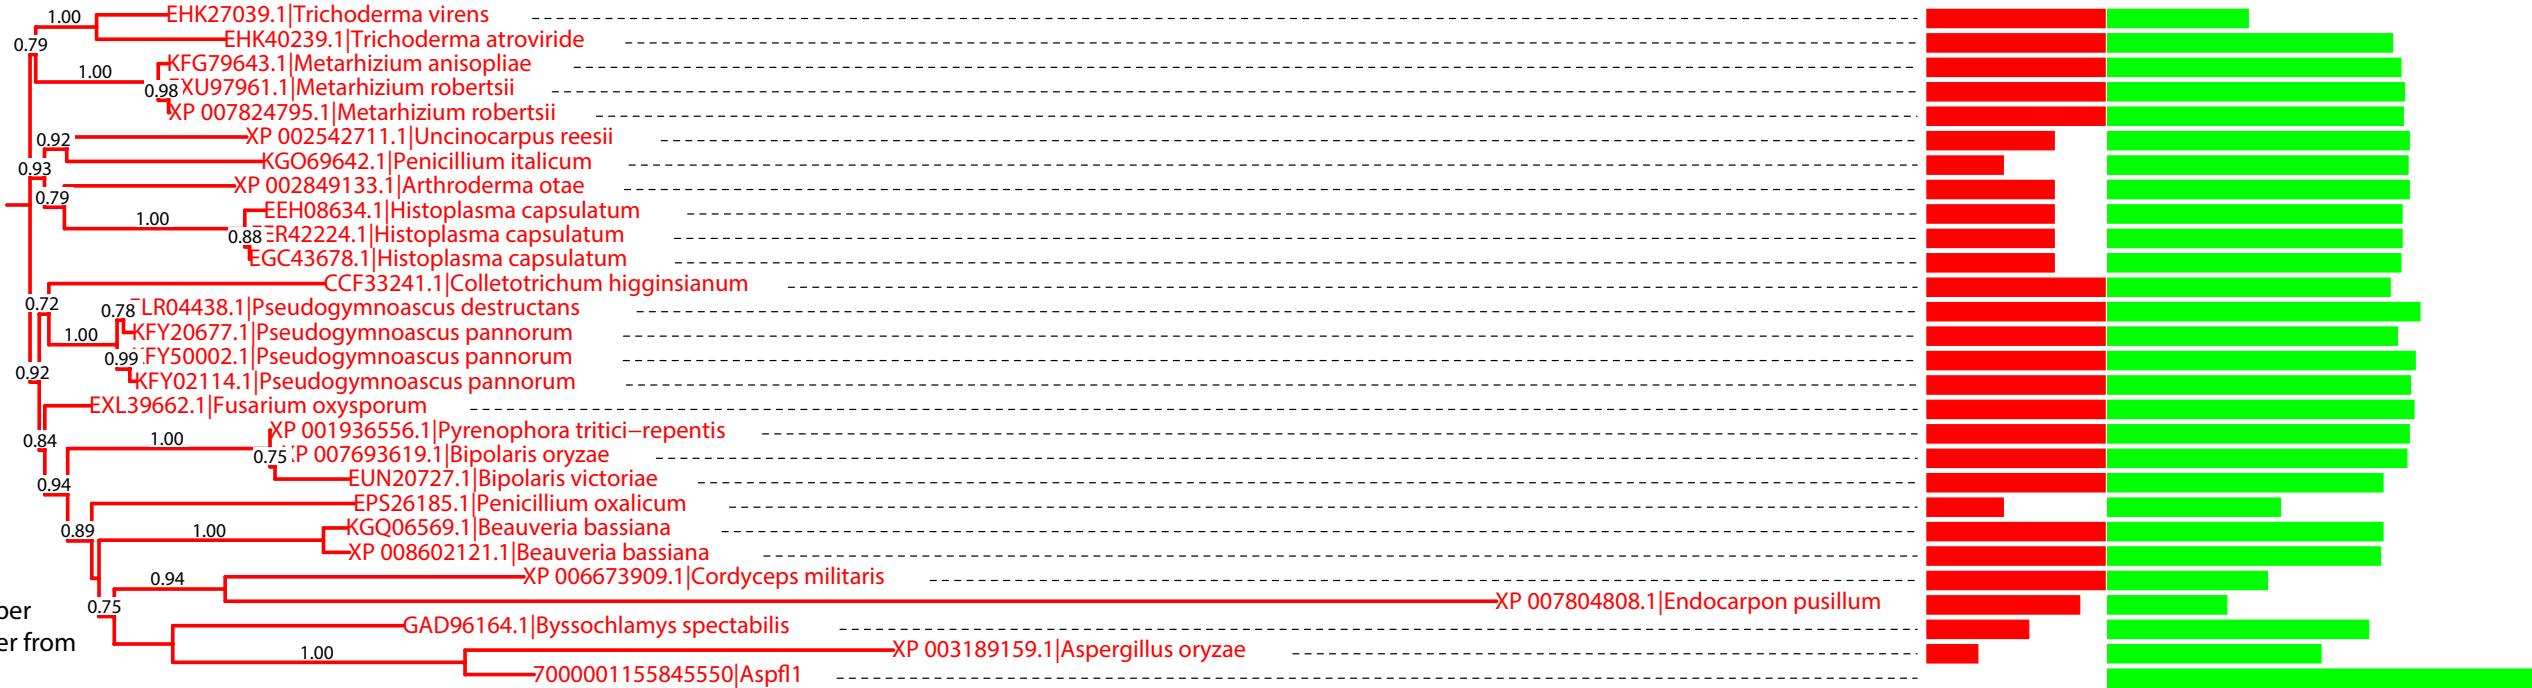

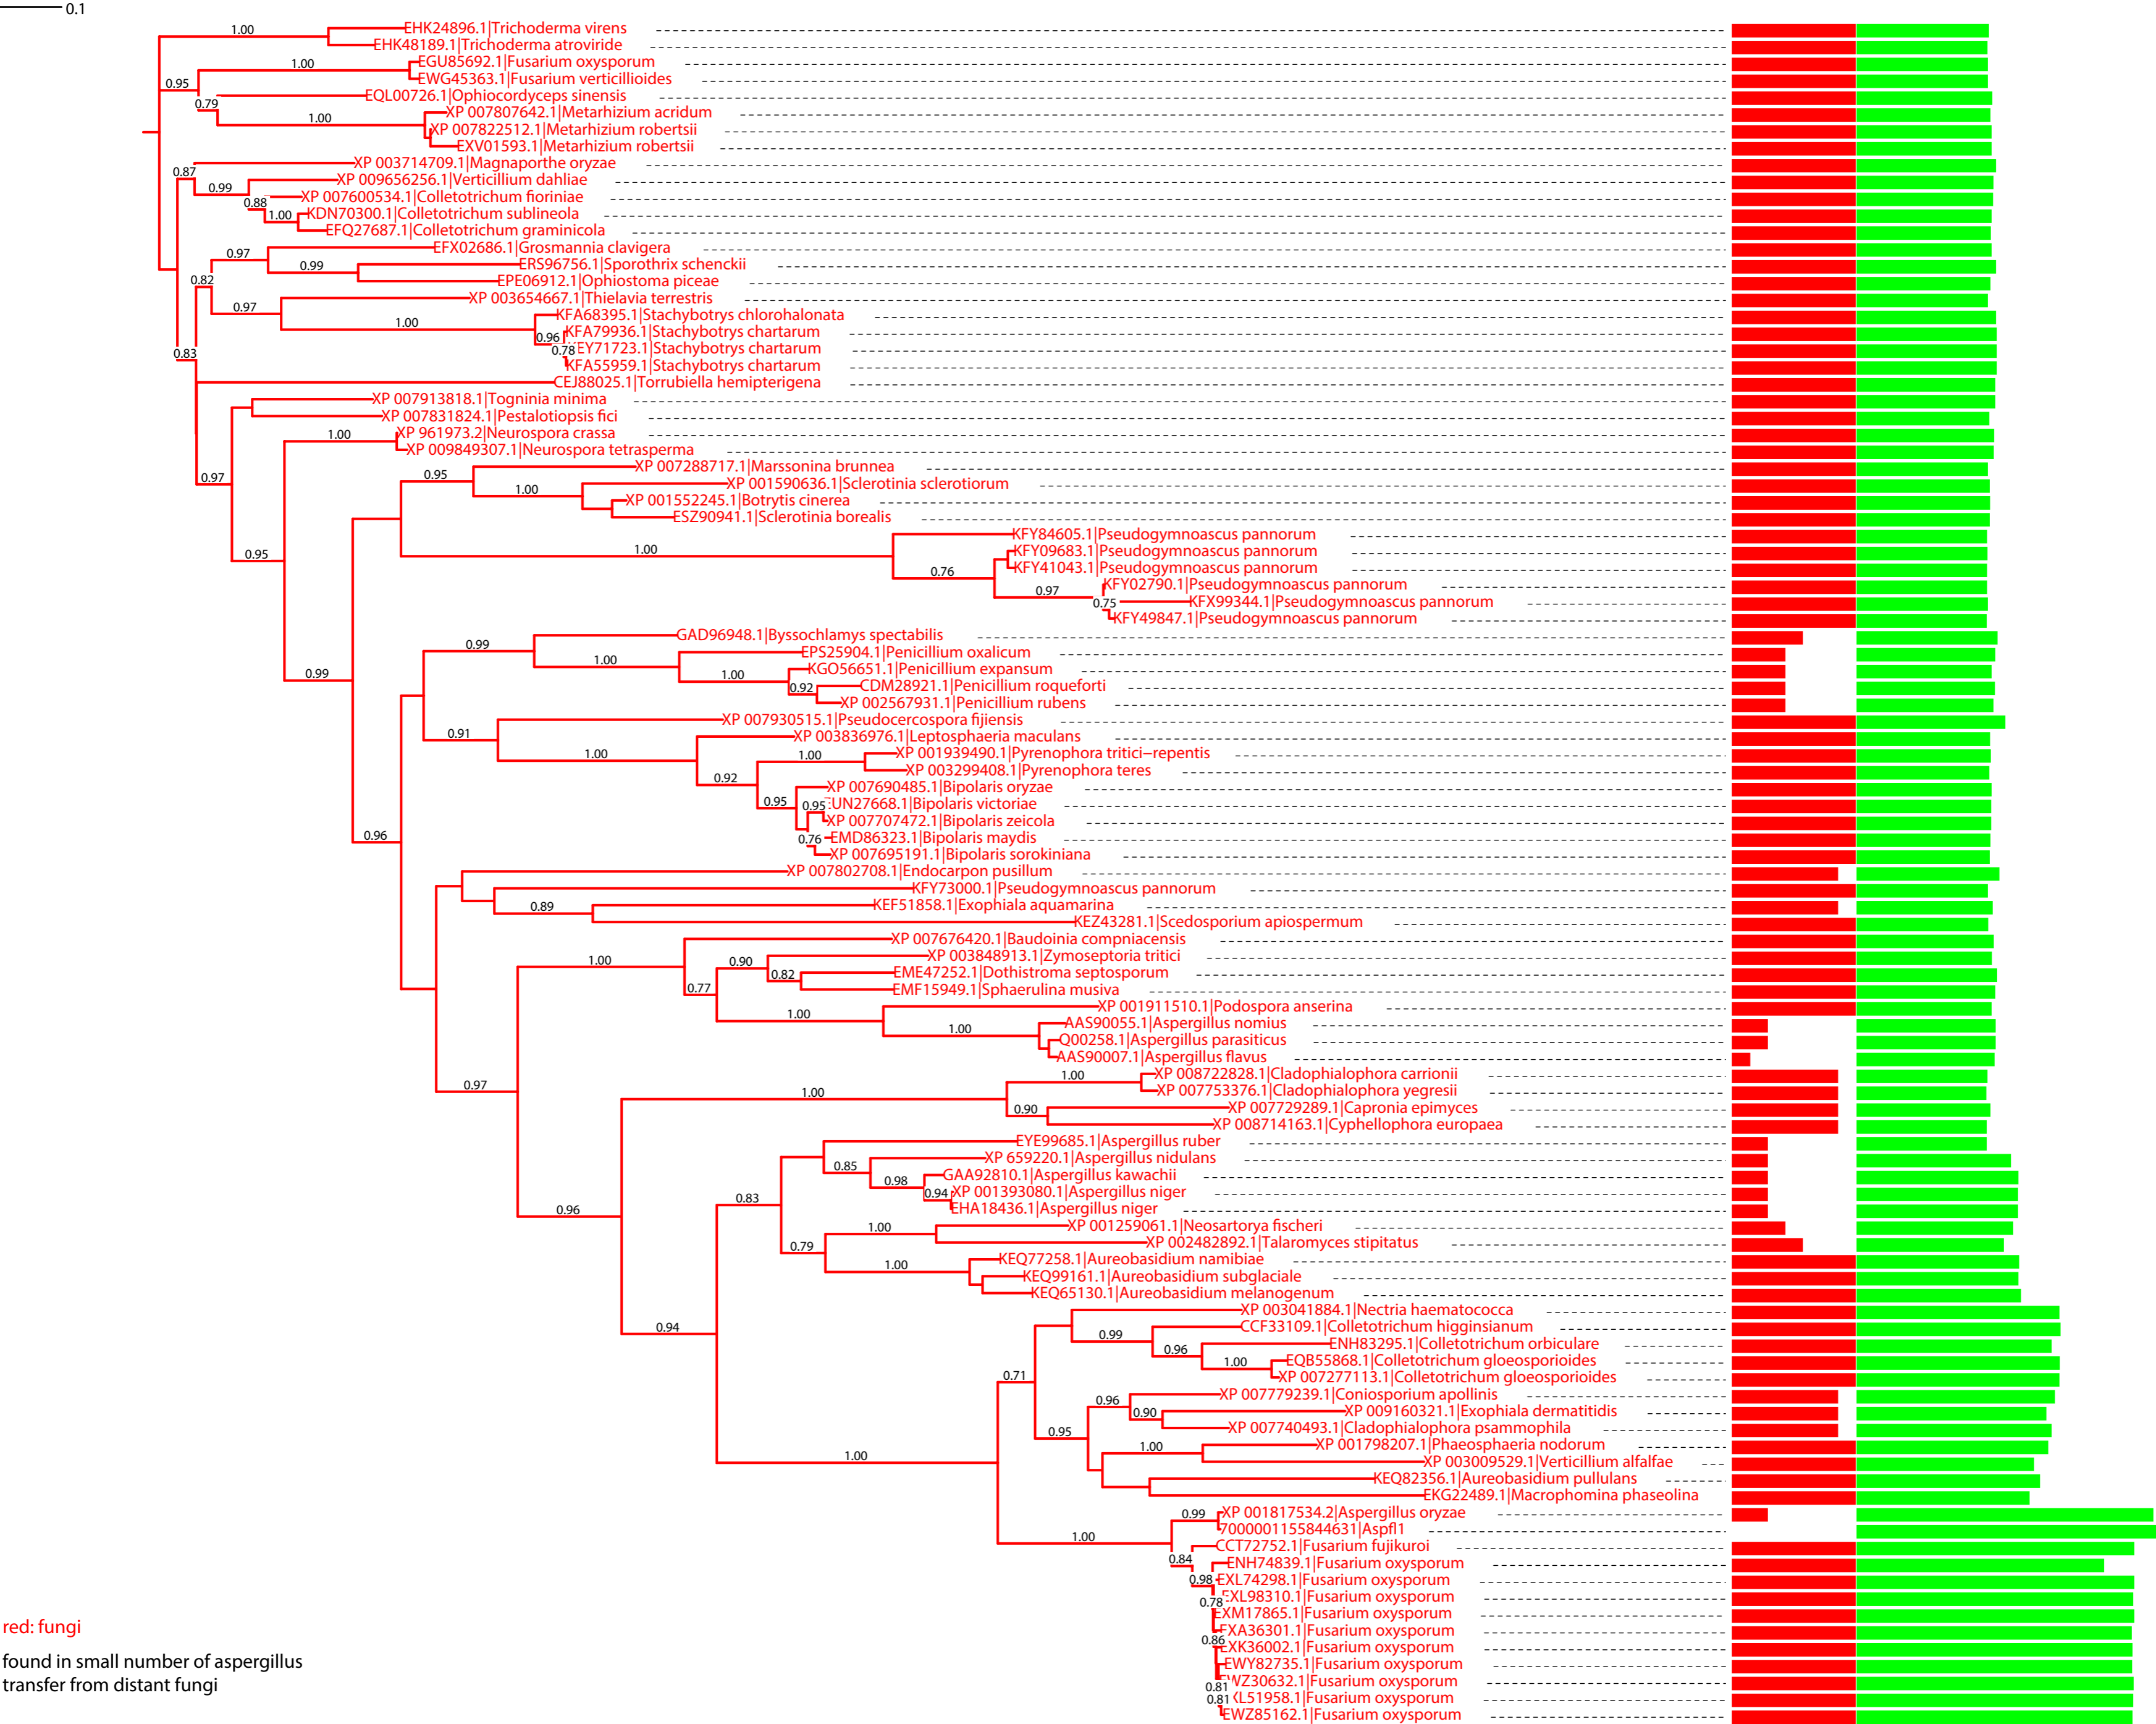

0.1

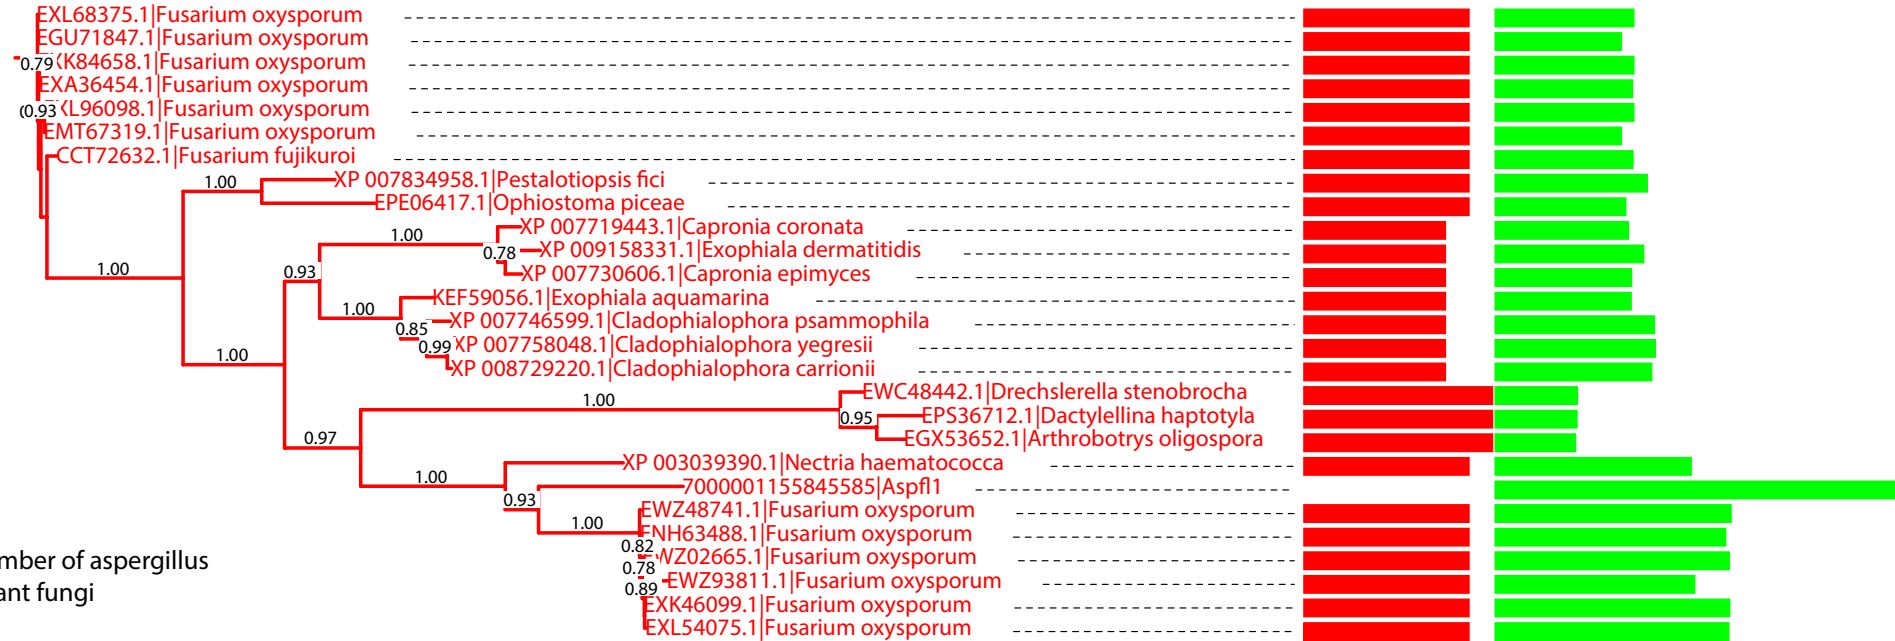

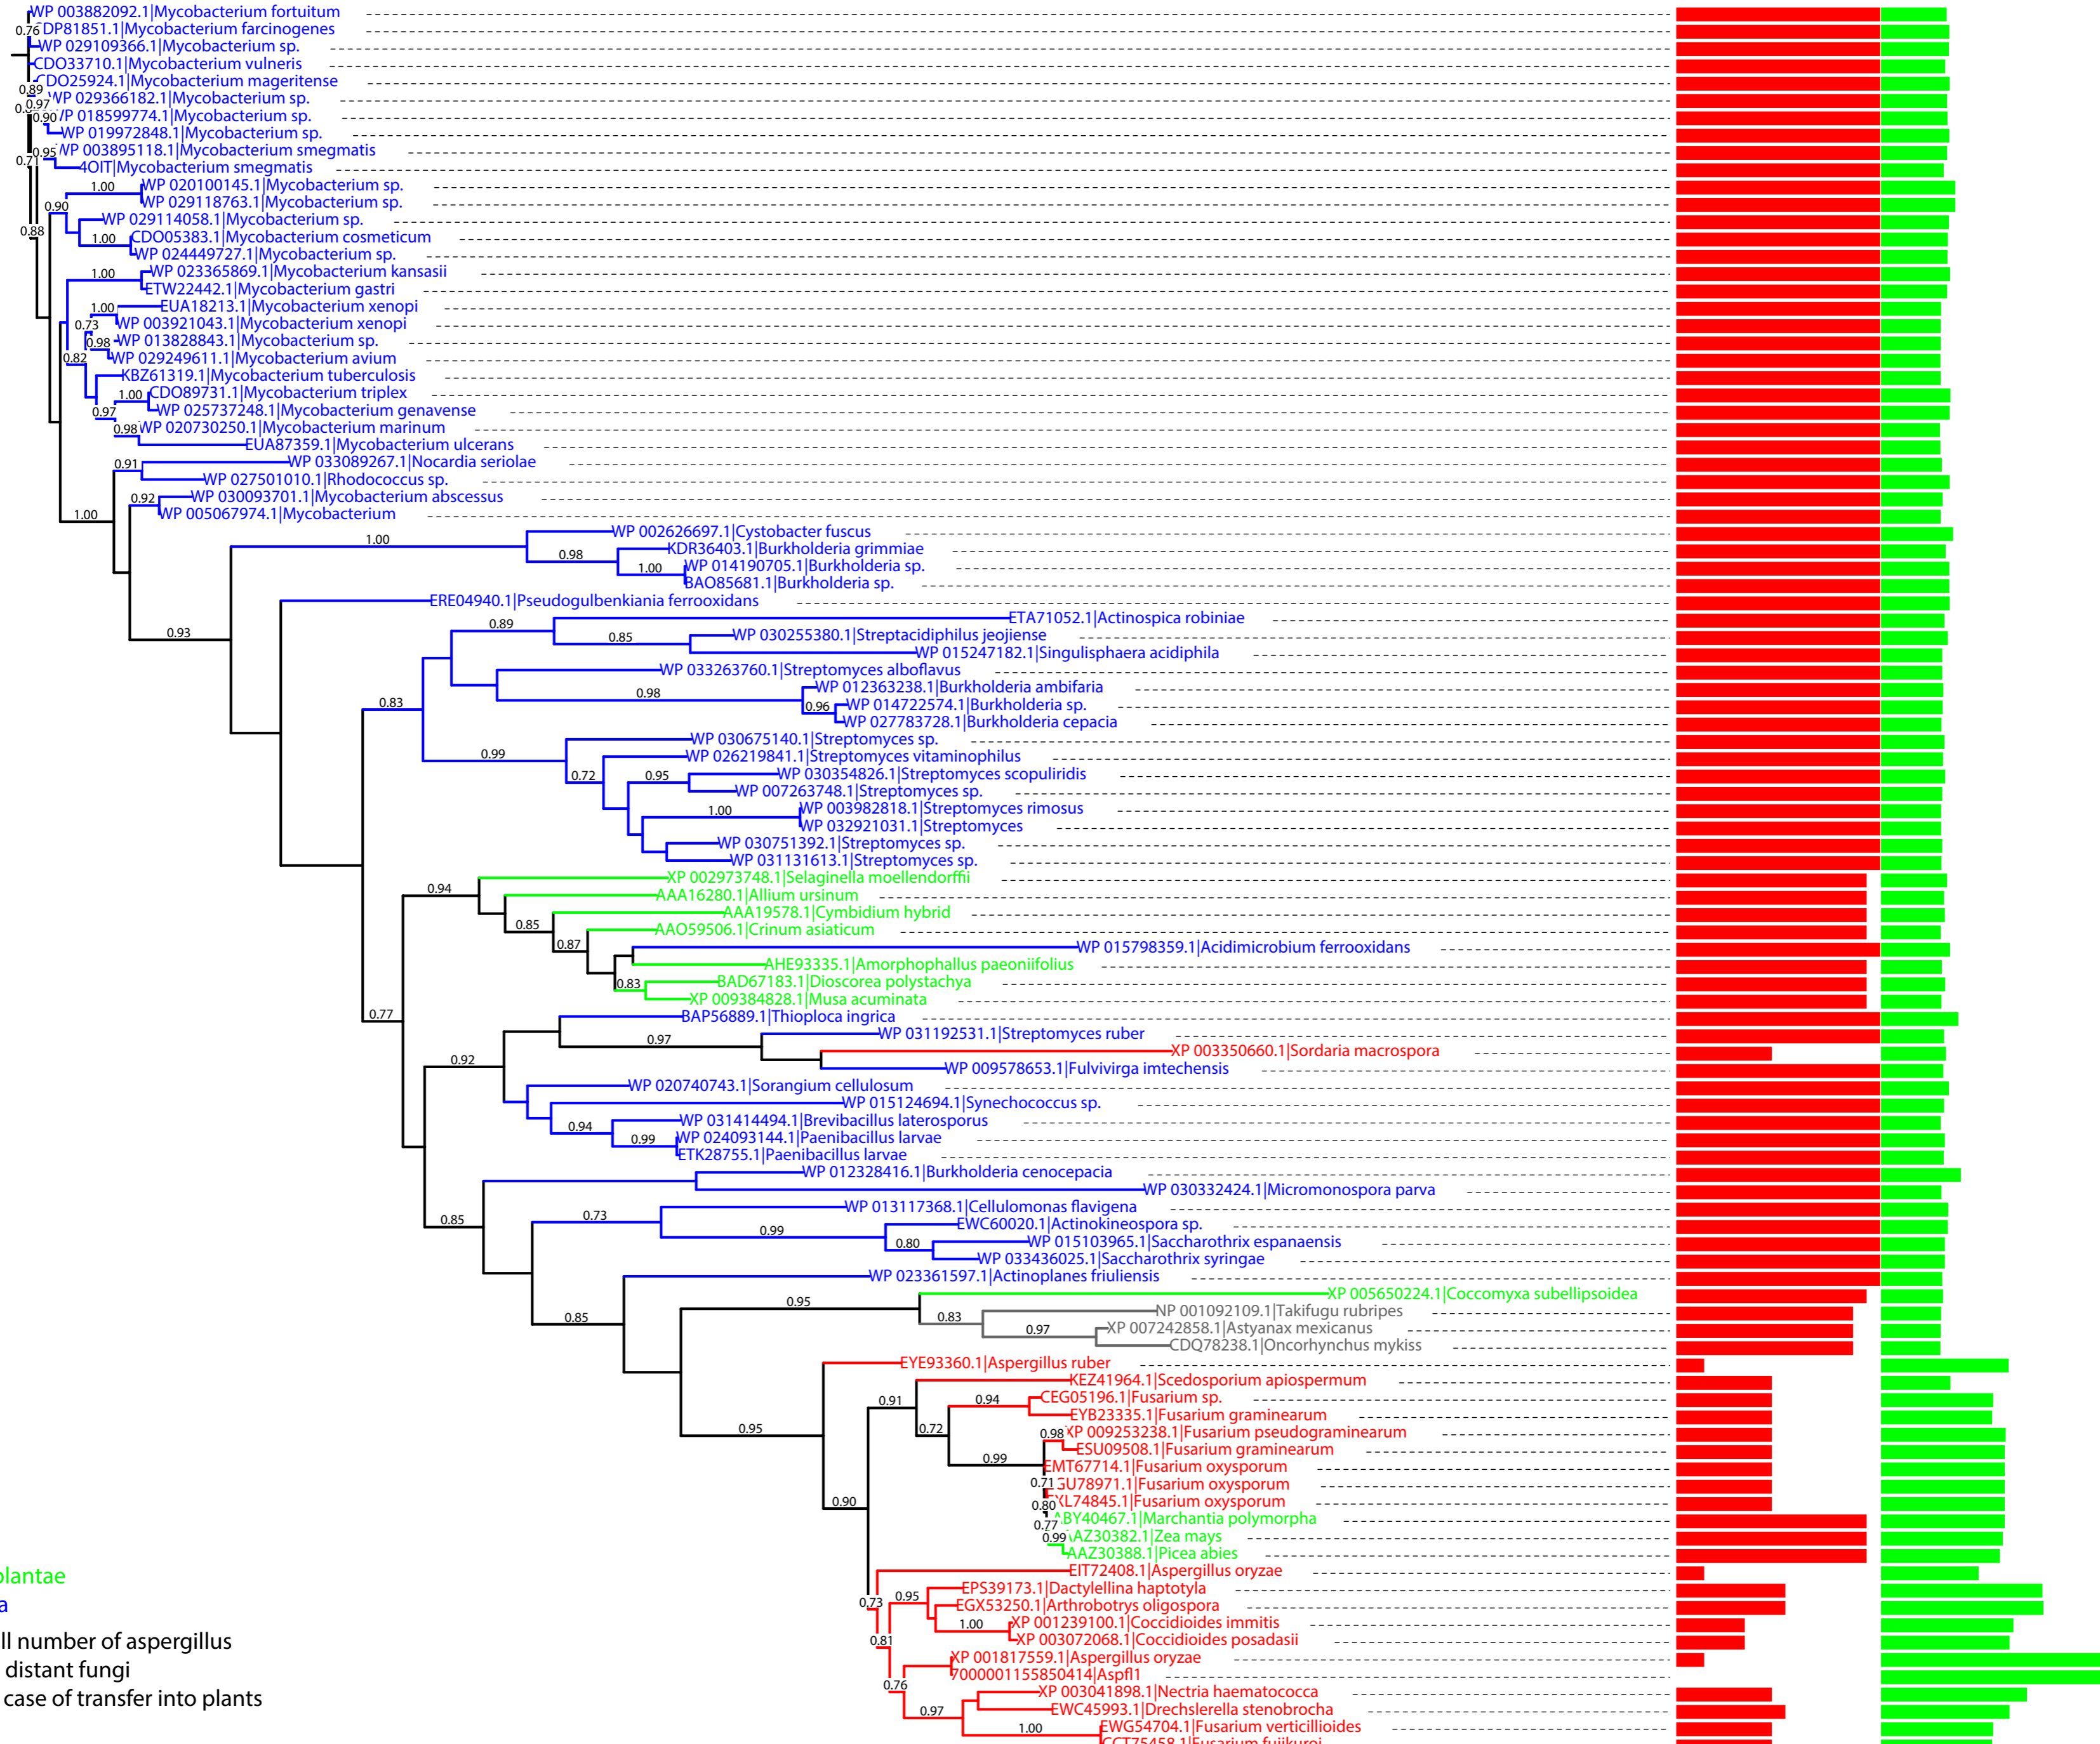

red: fungi  
green: viridiplantae  
blue: bacteria

found in small number of aspergillus  
transfer from distant fungi  
also possible case of transfer into plants

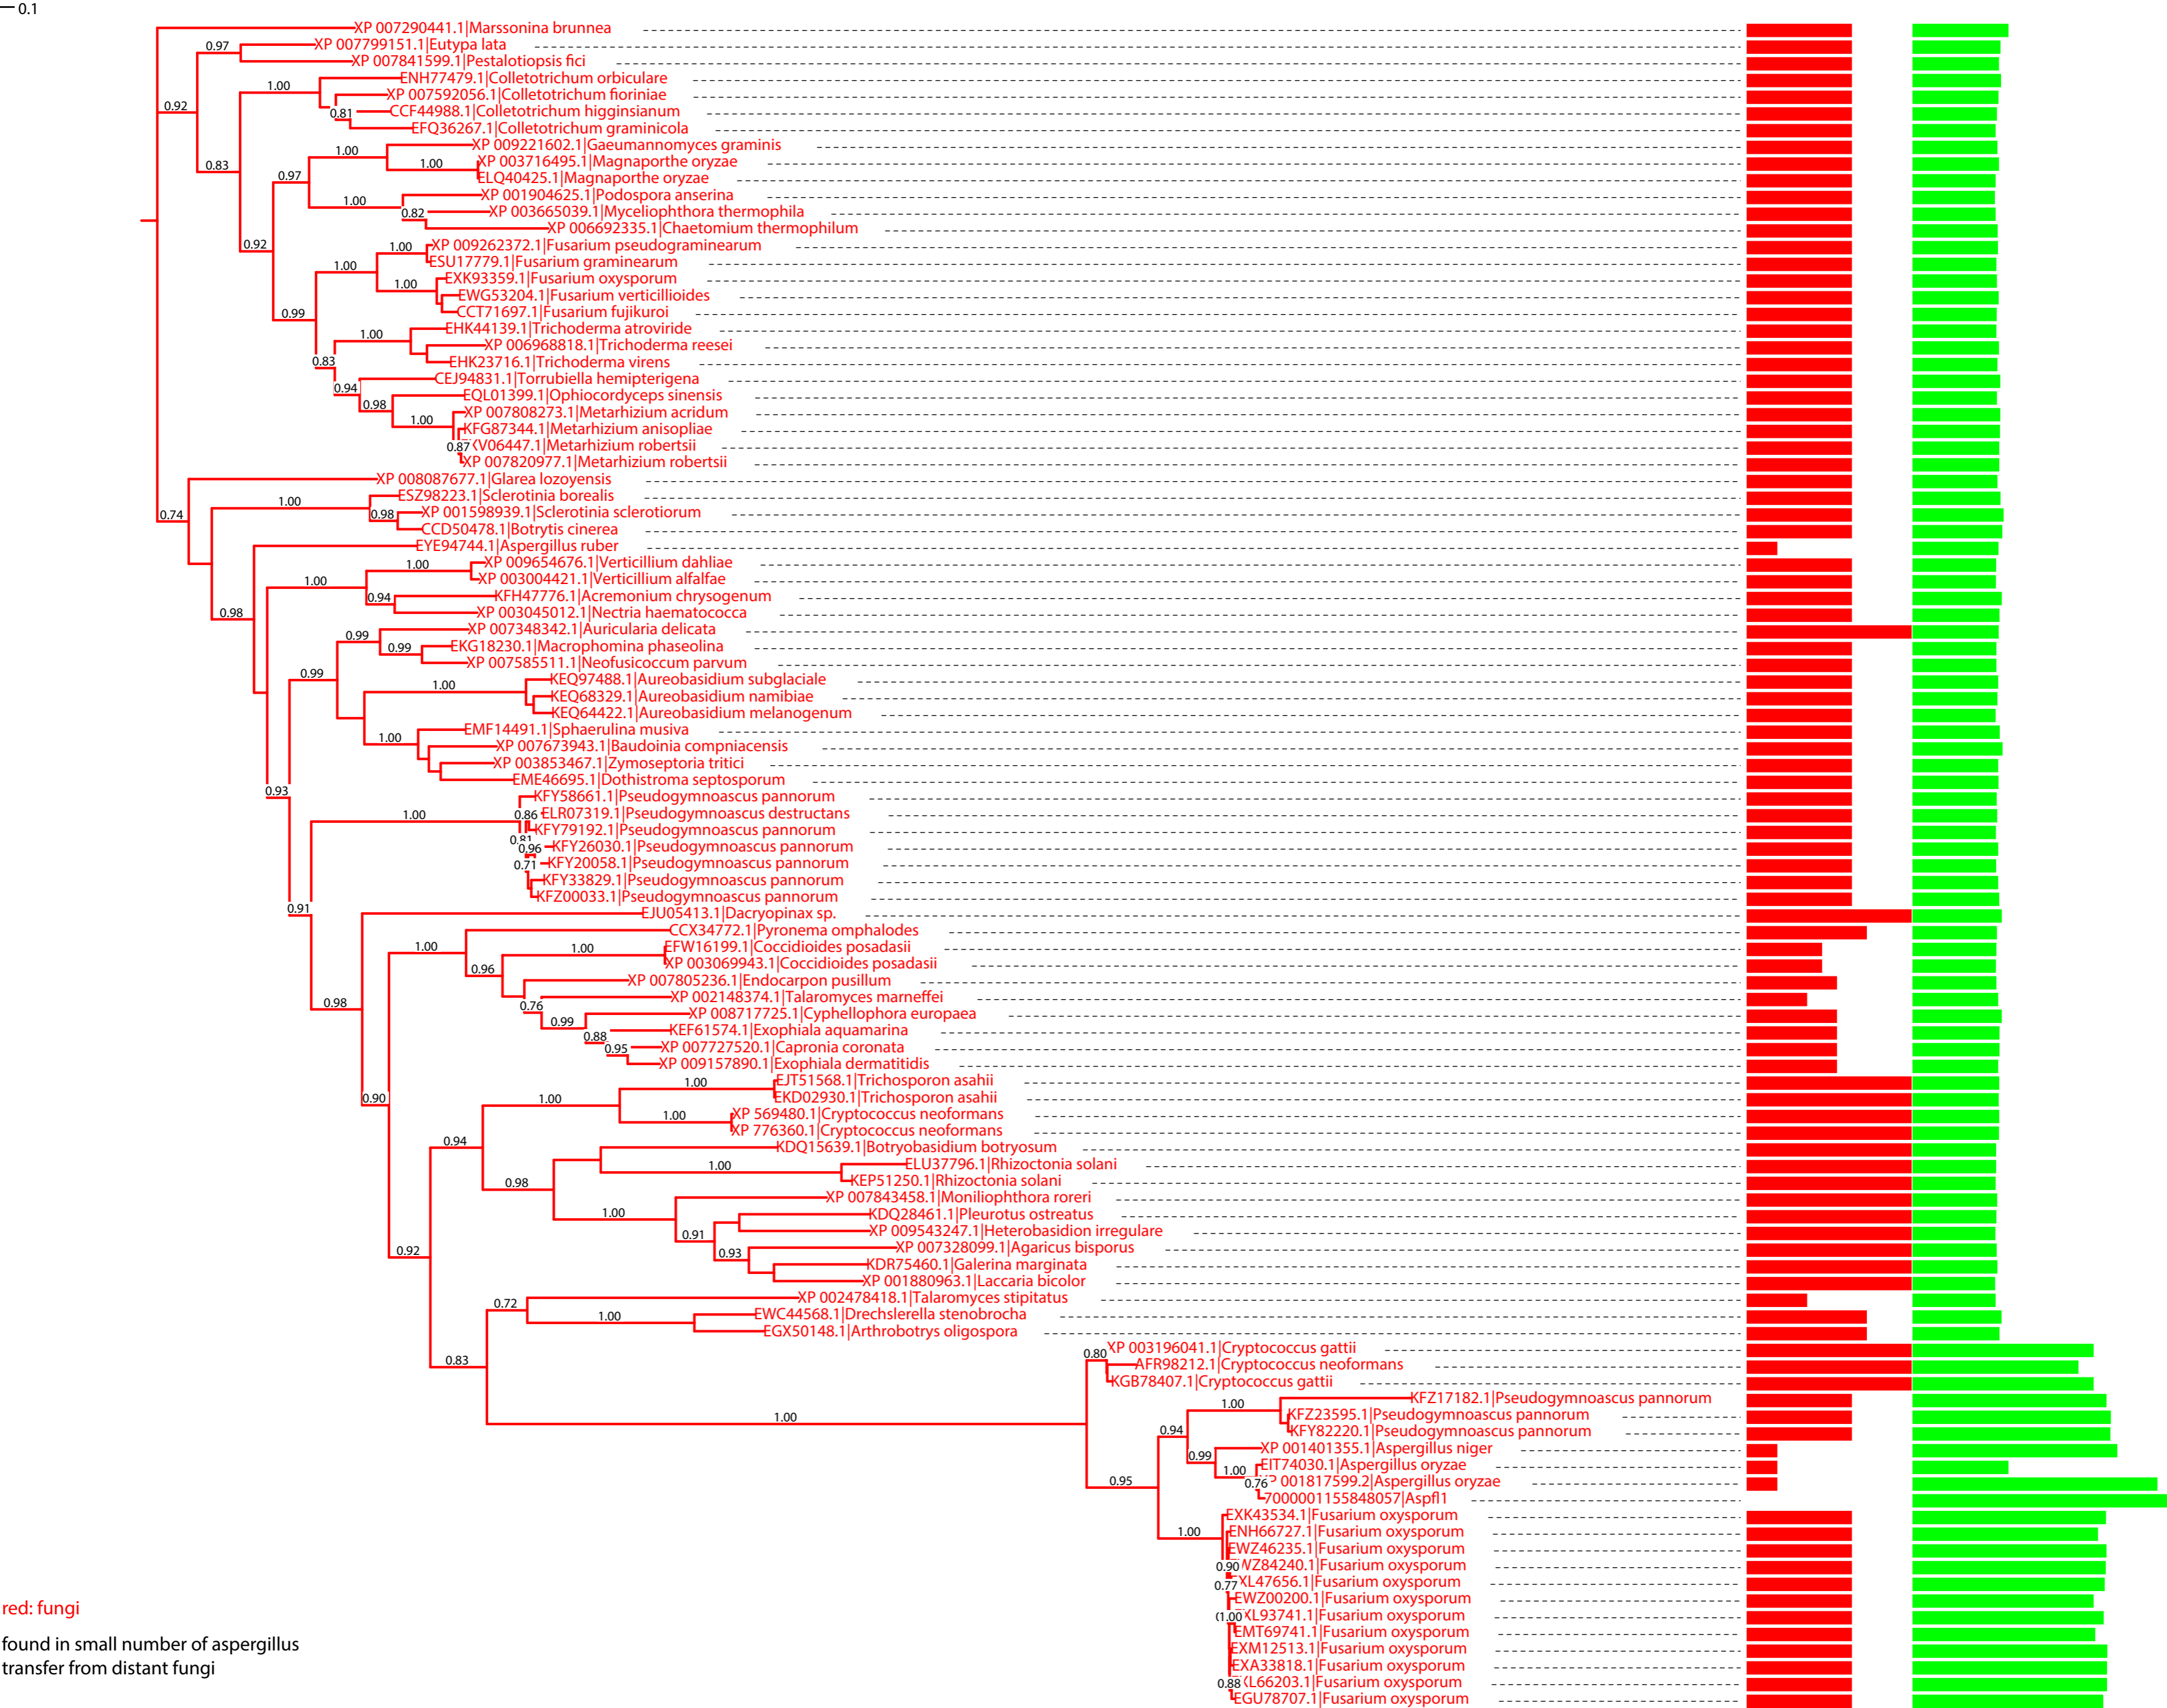

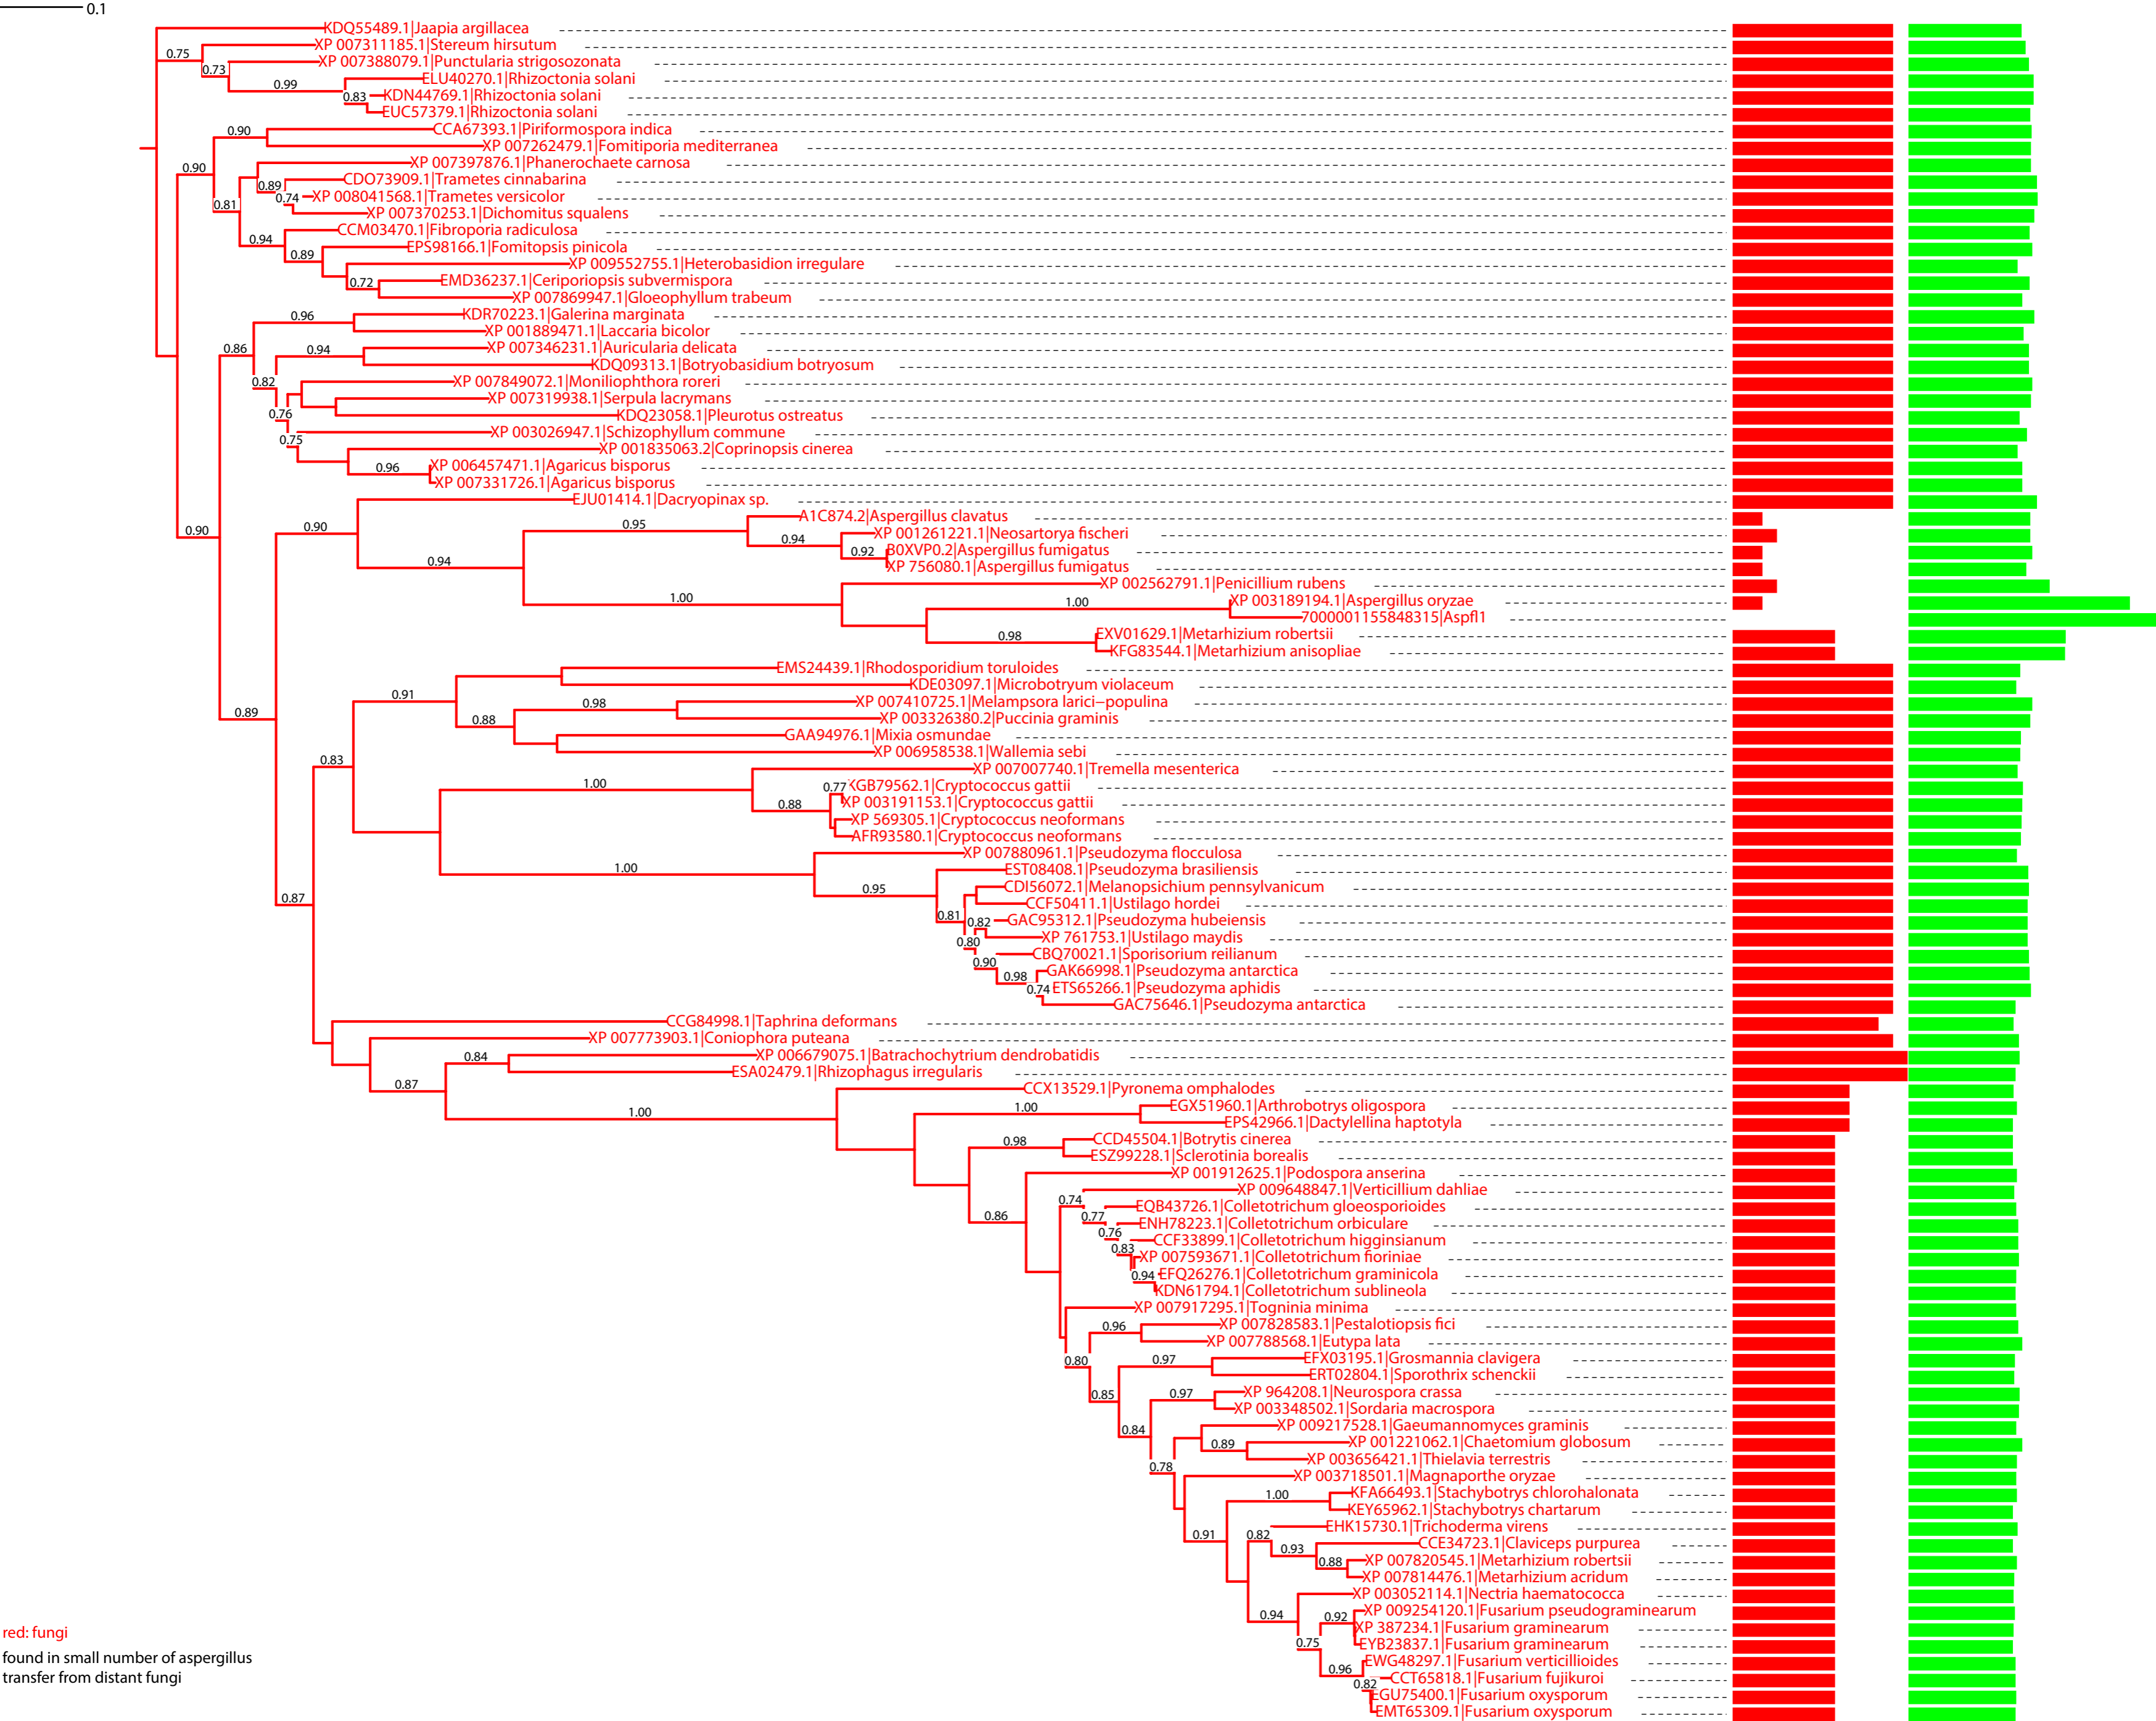

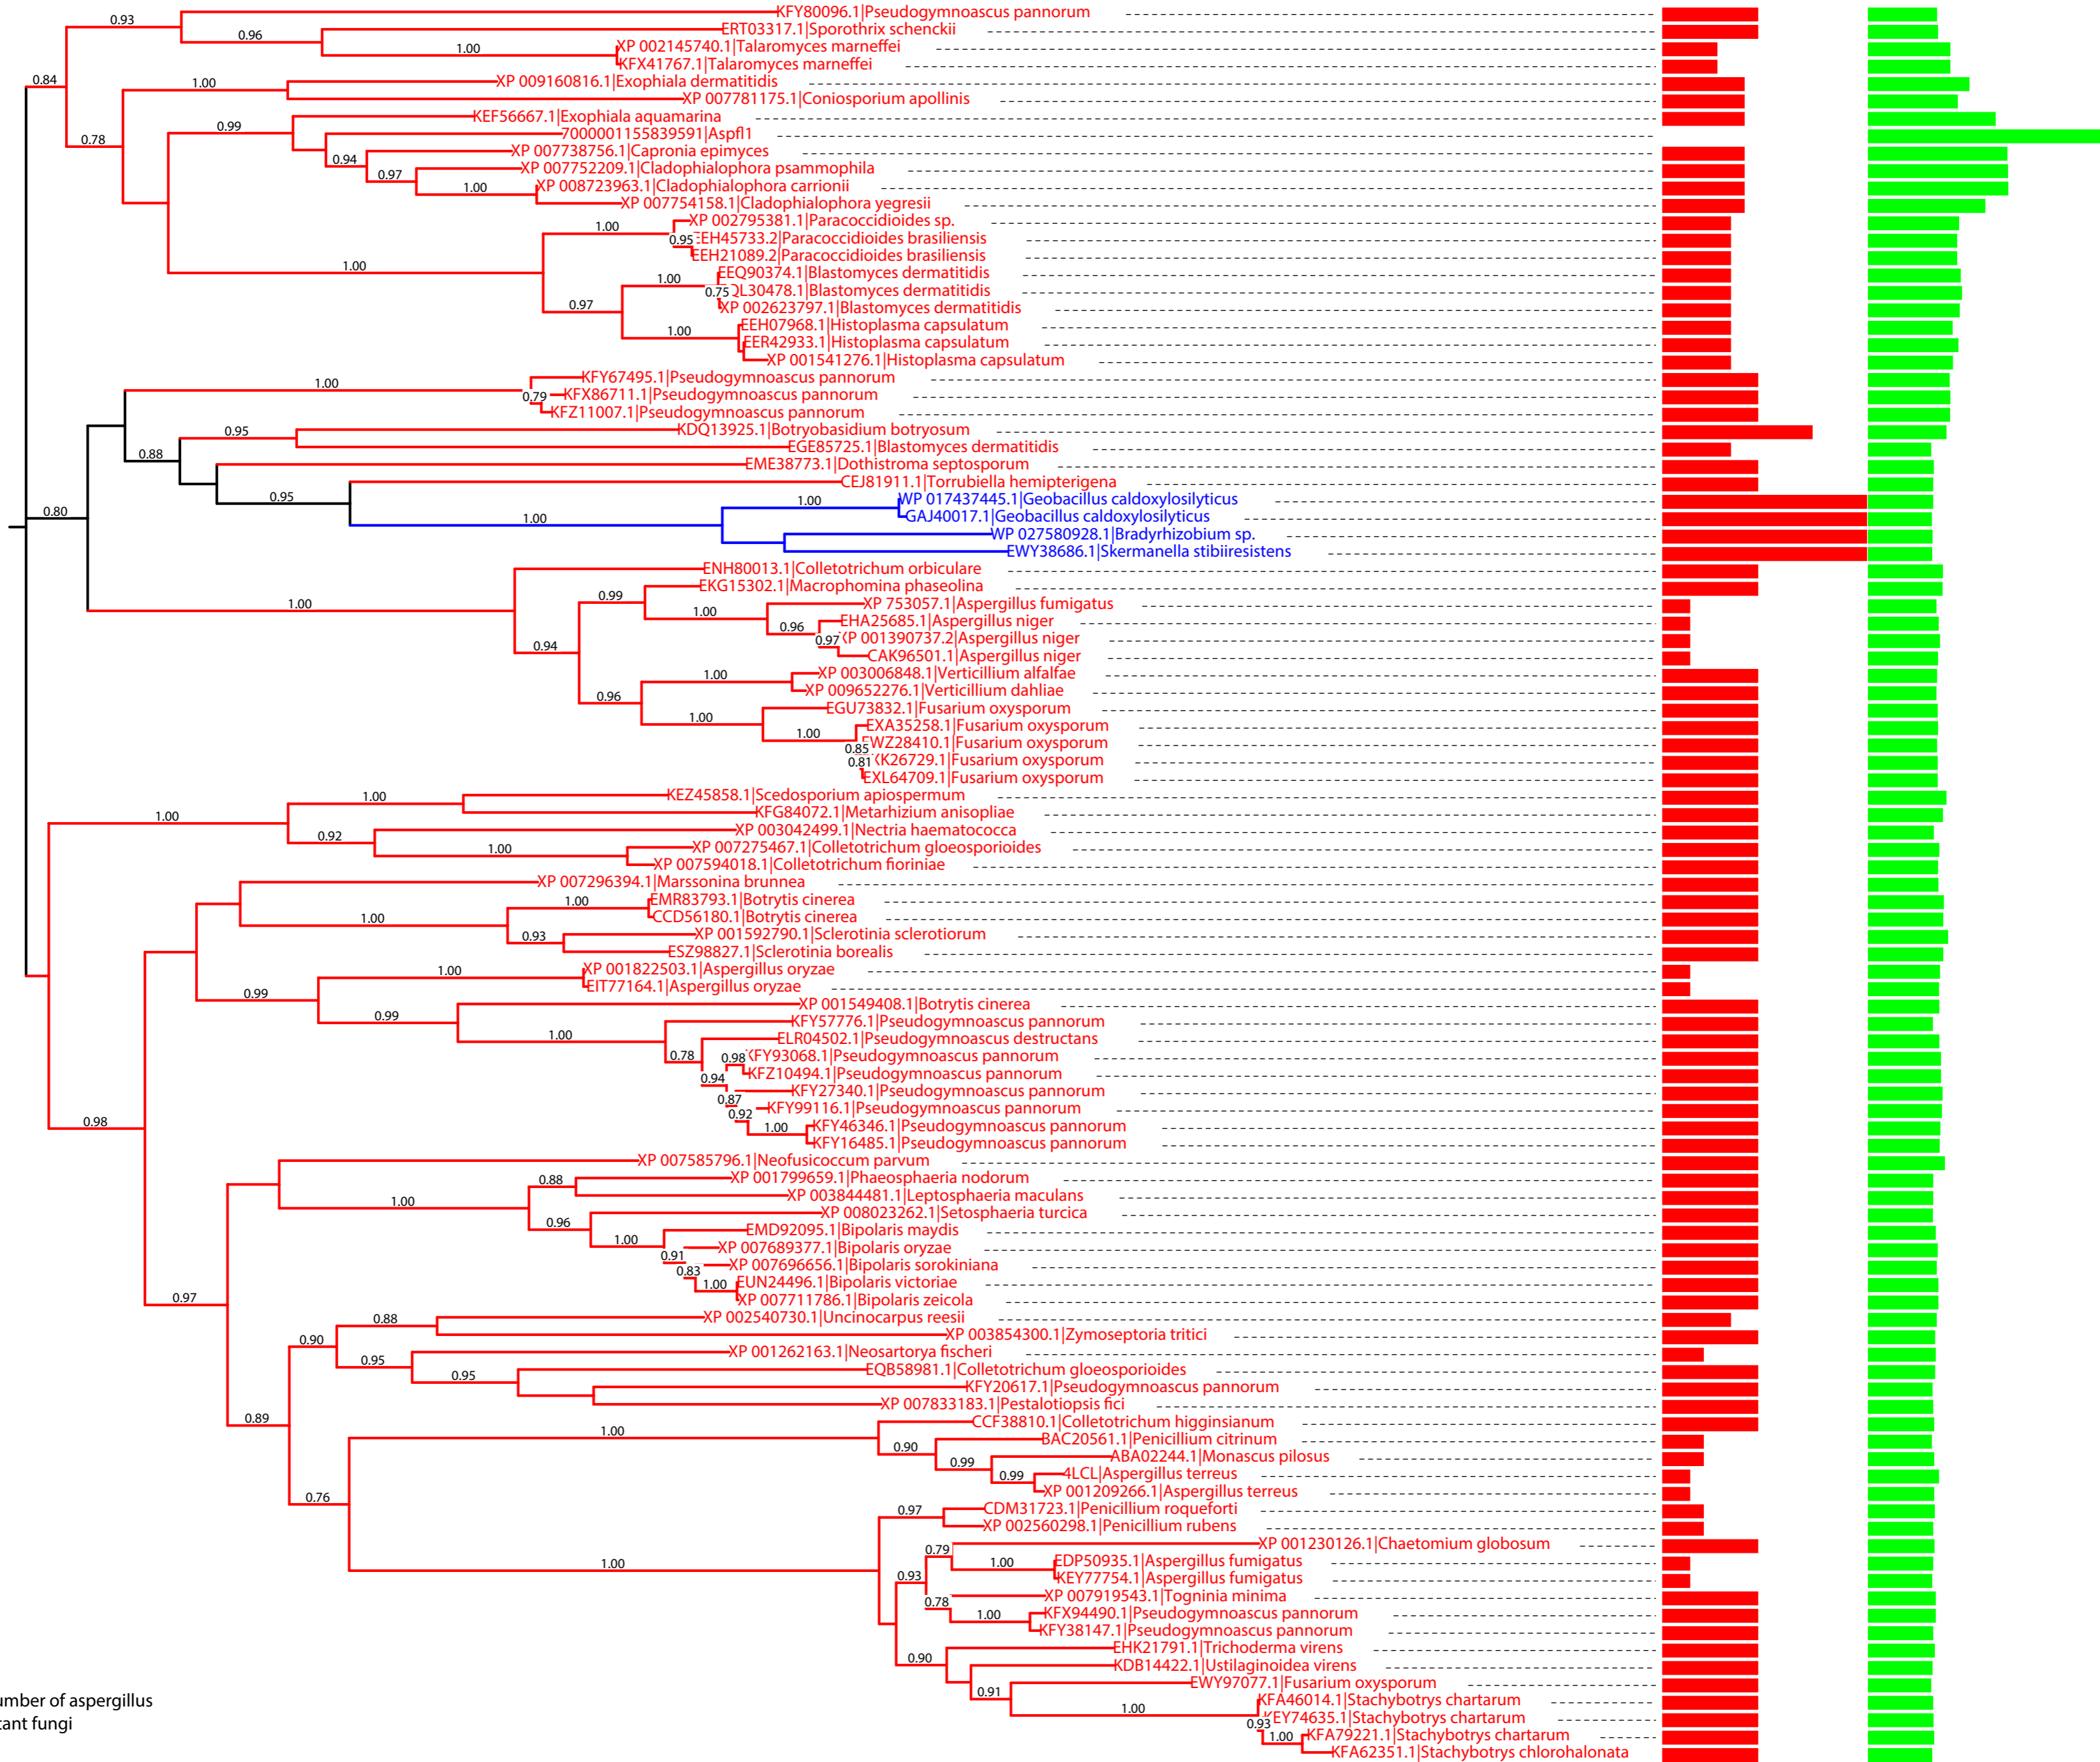

red: fungi

blue: bacteria

found in small number of aspergillus

transfer from distant fungi

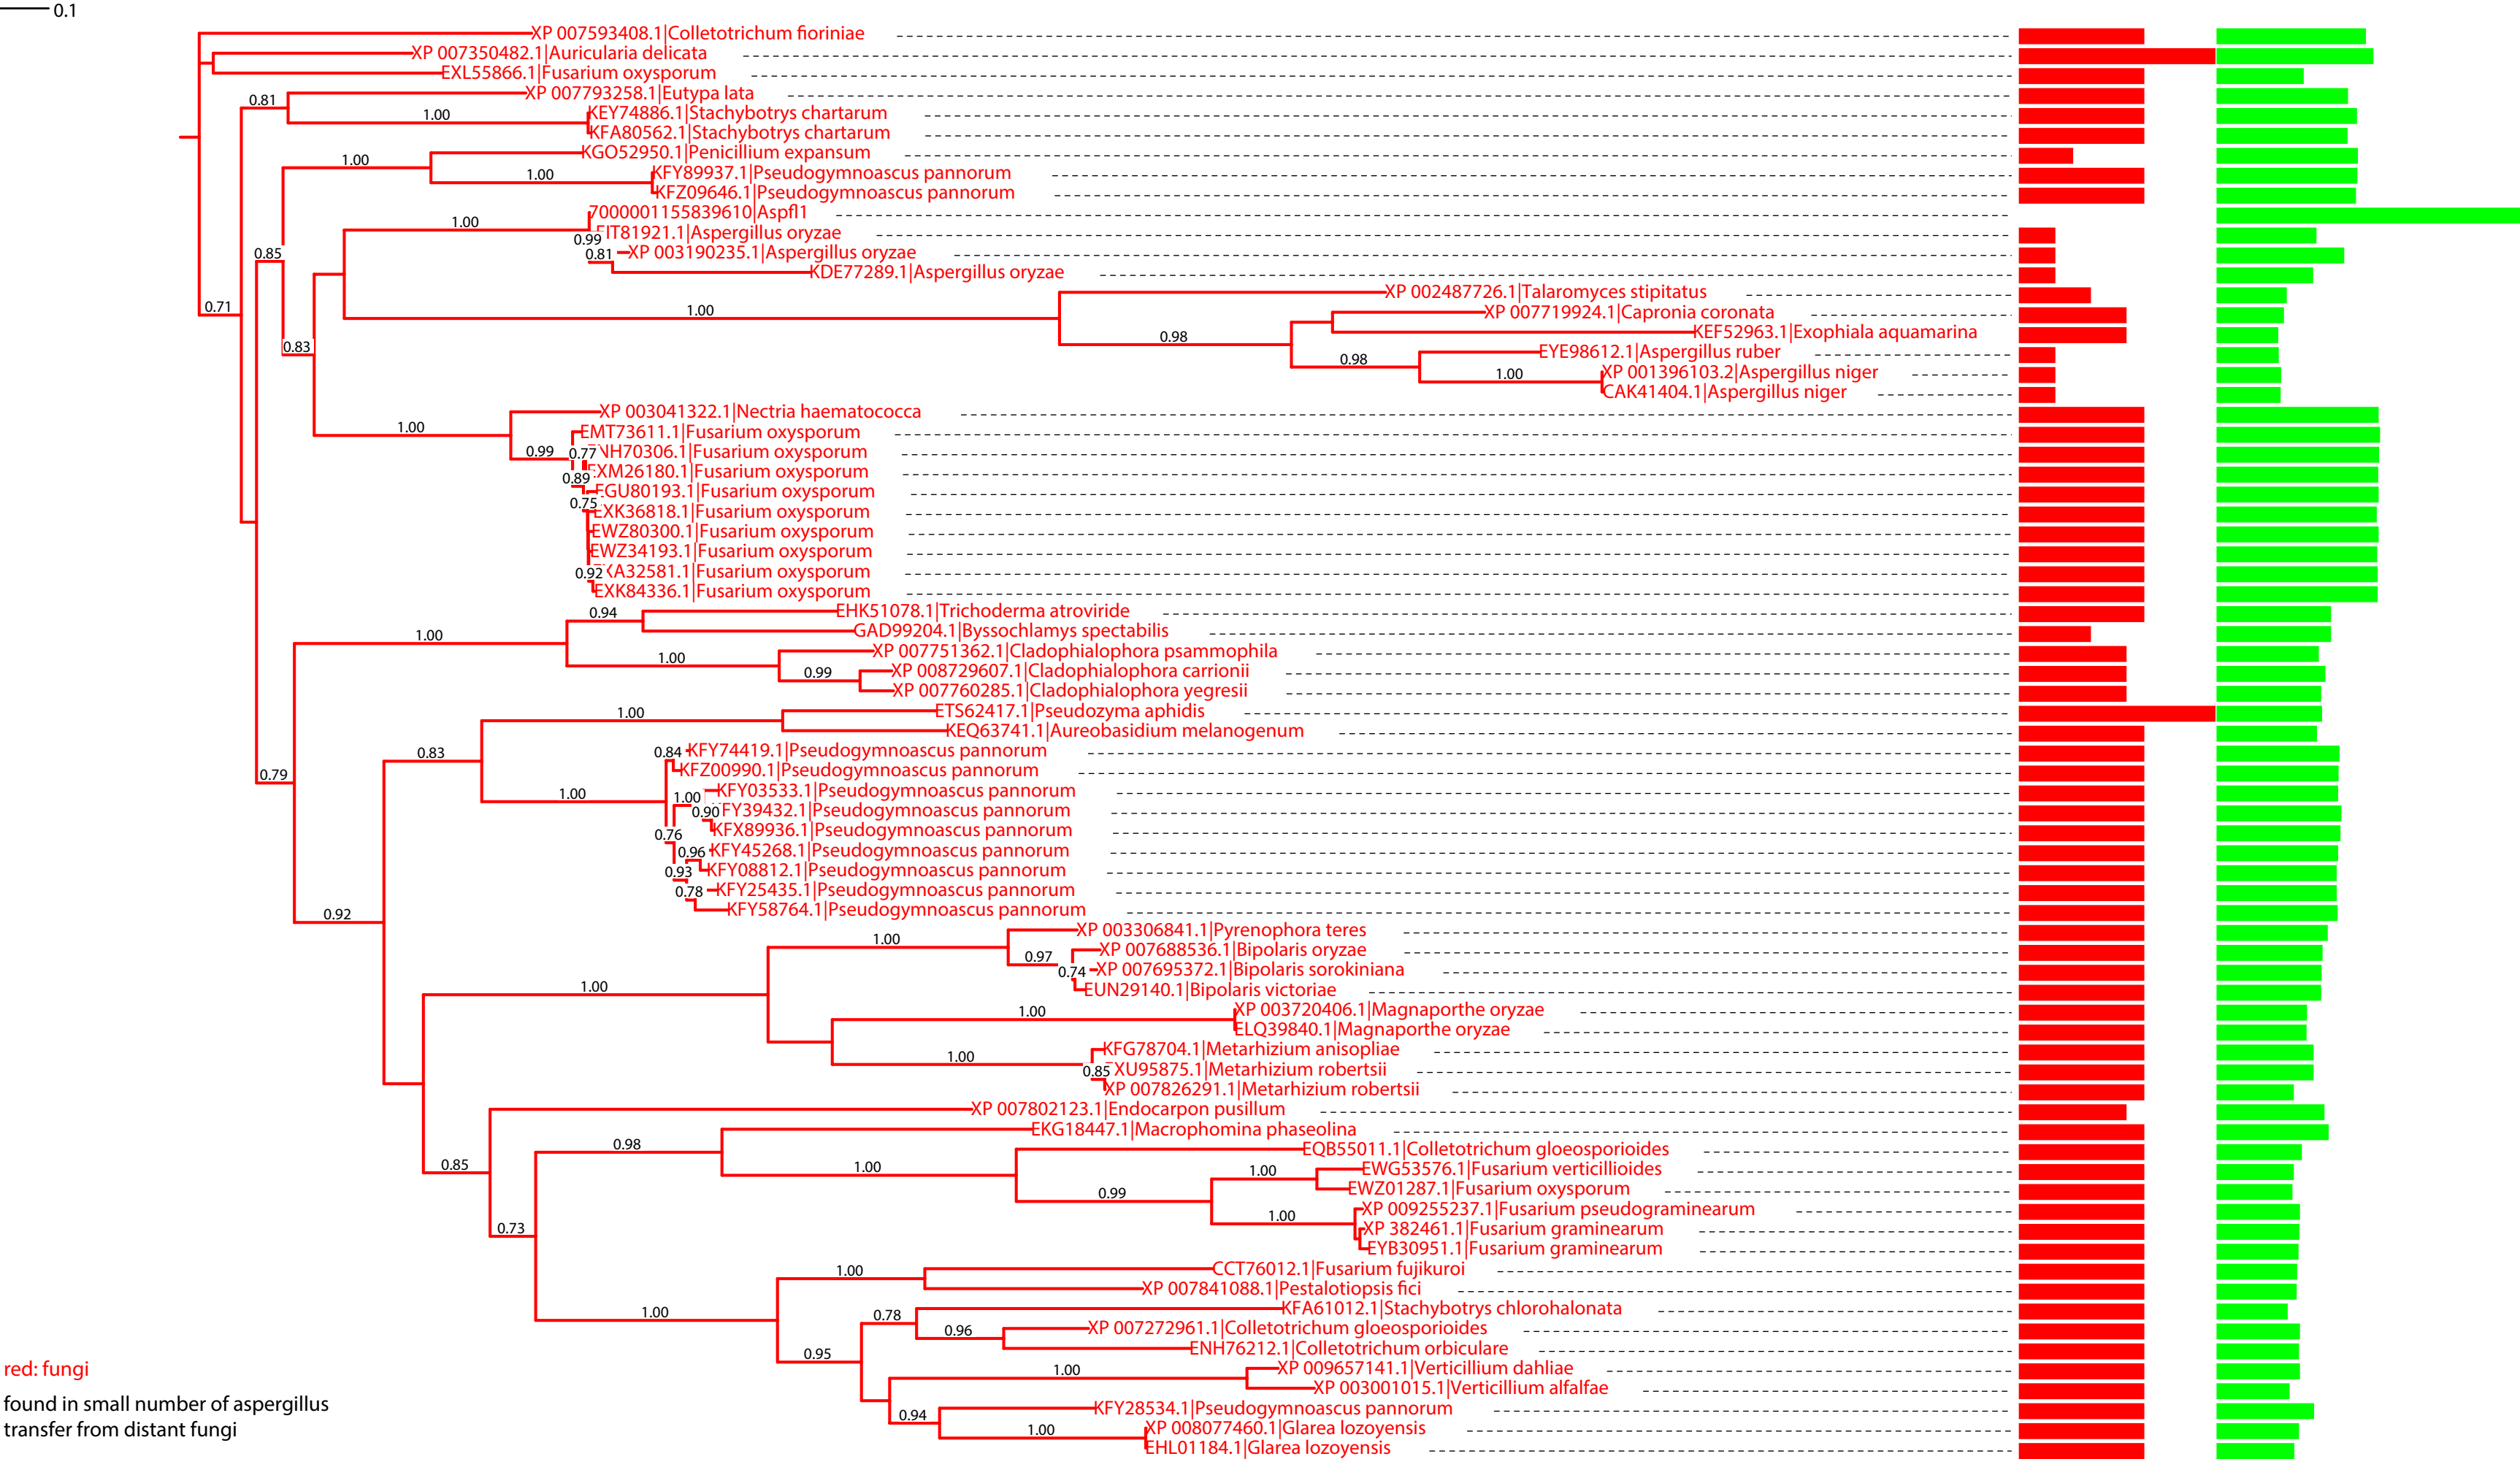

0.1

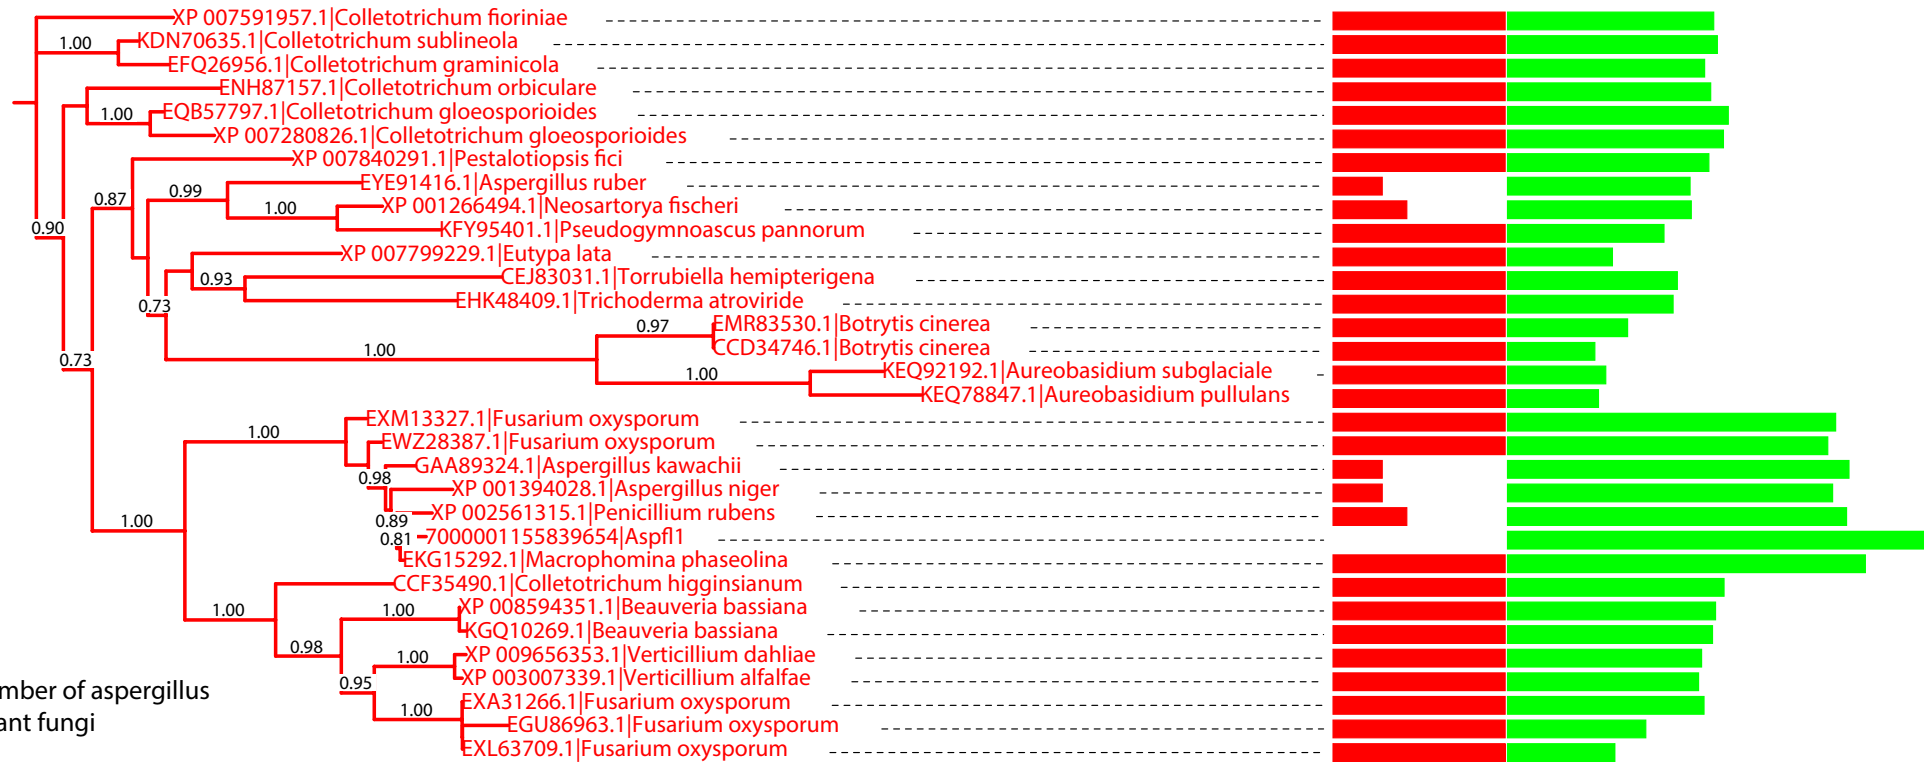

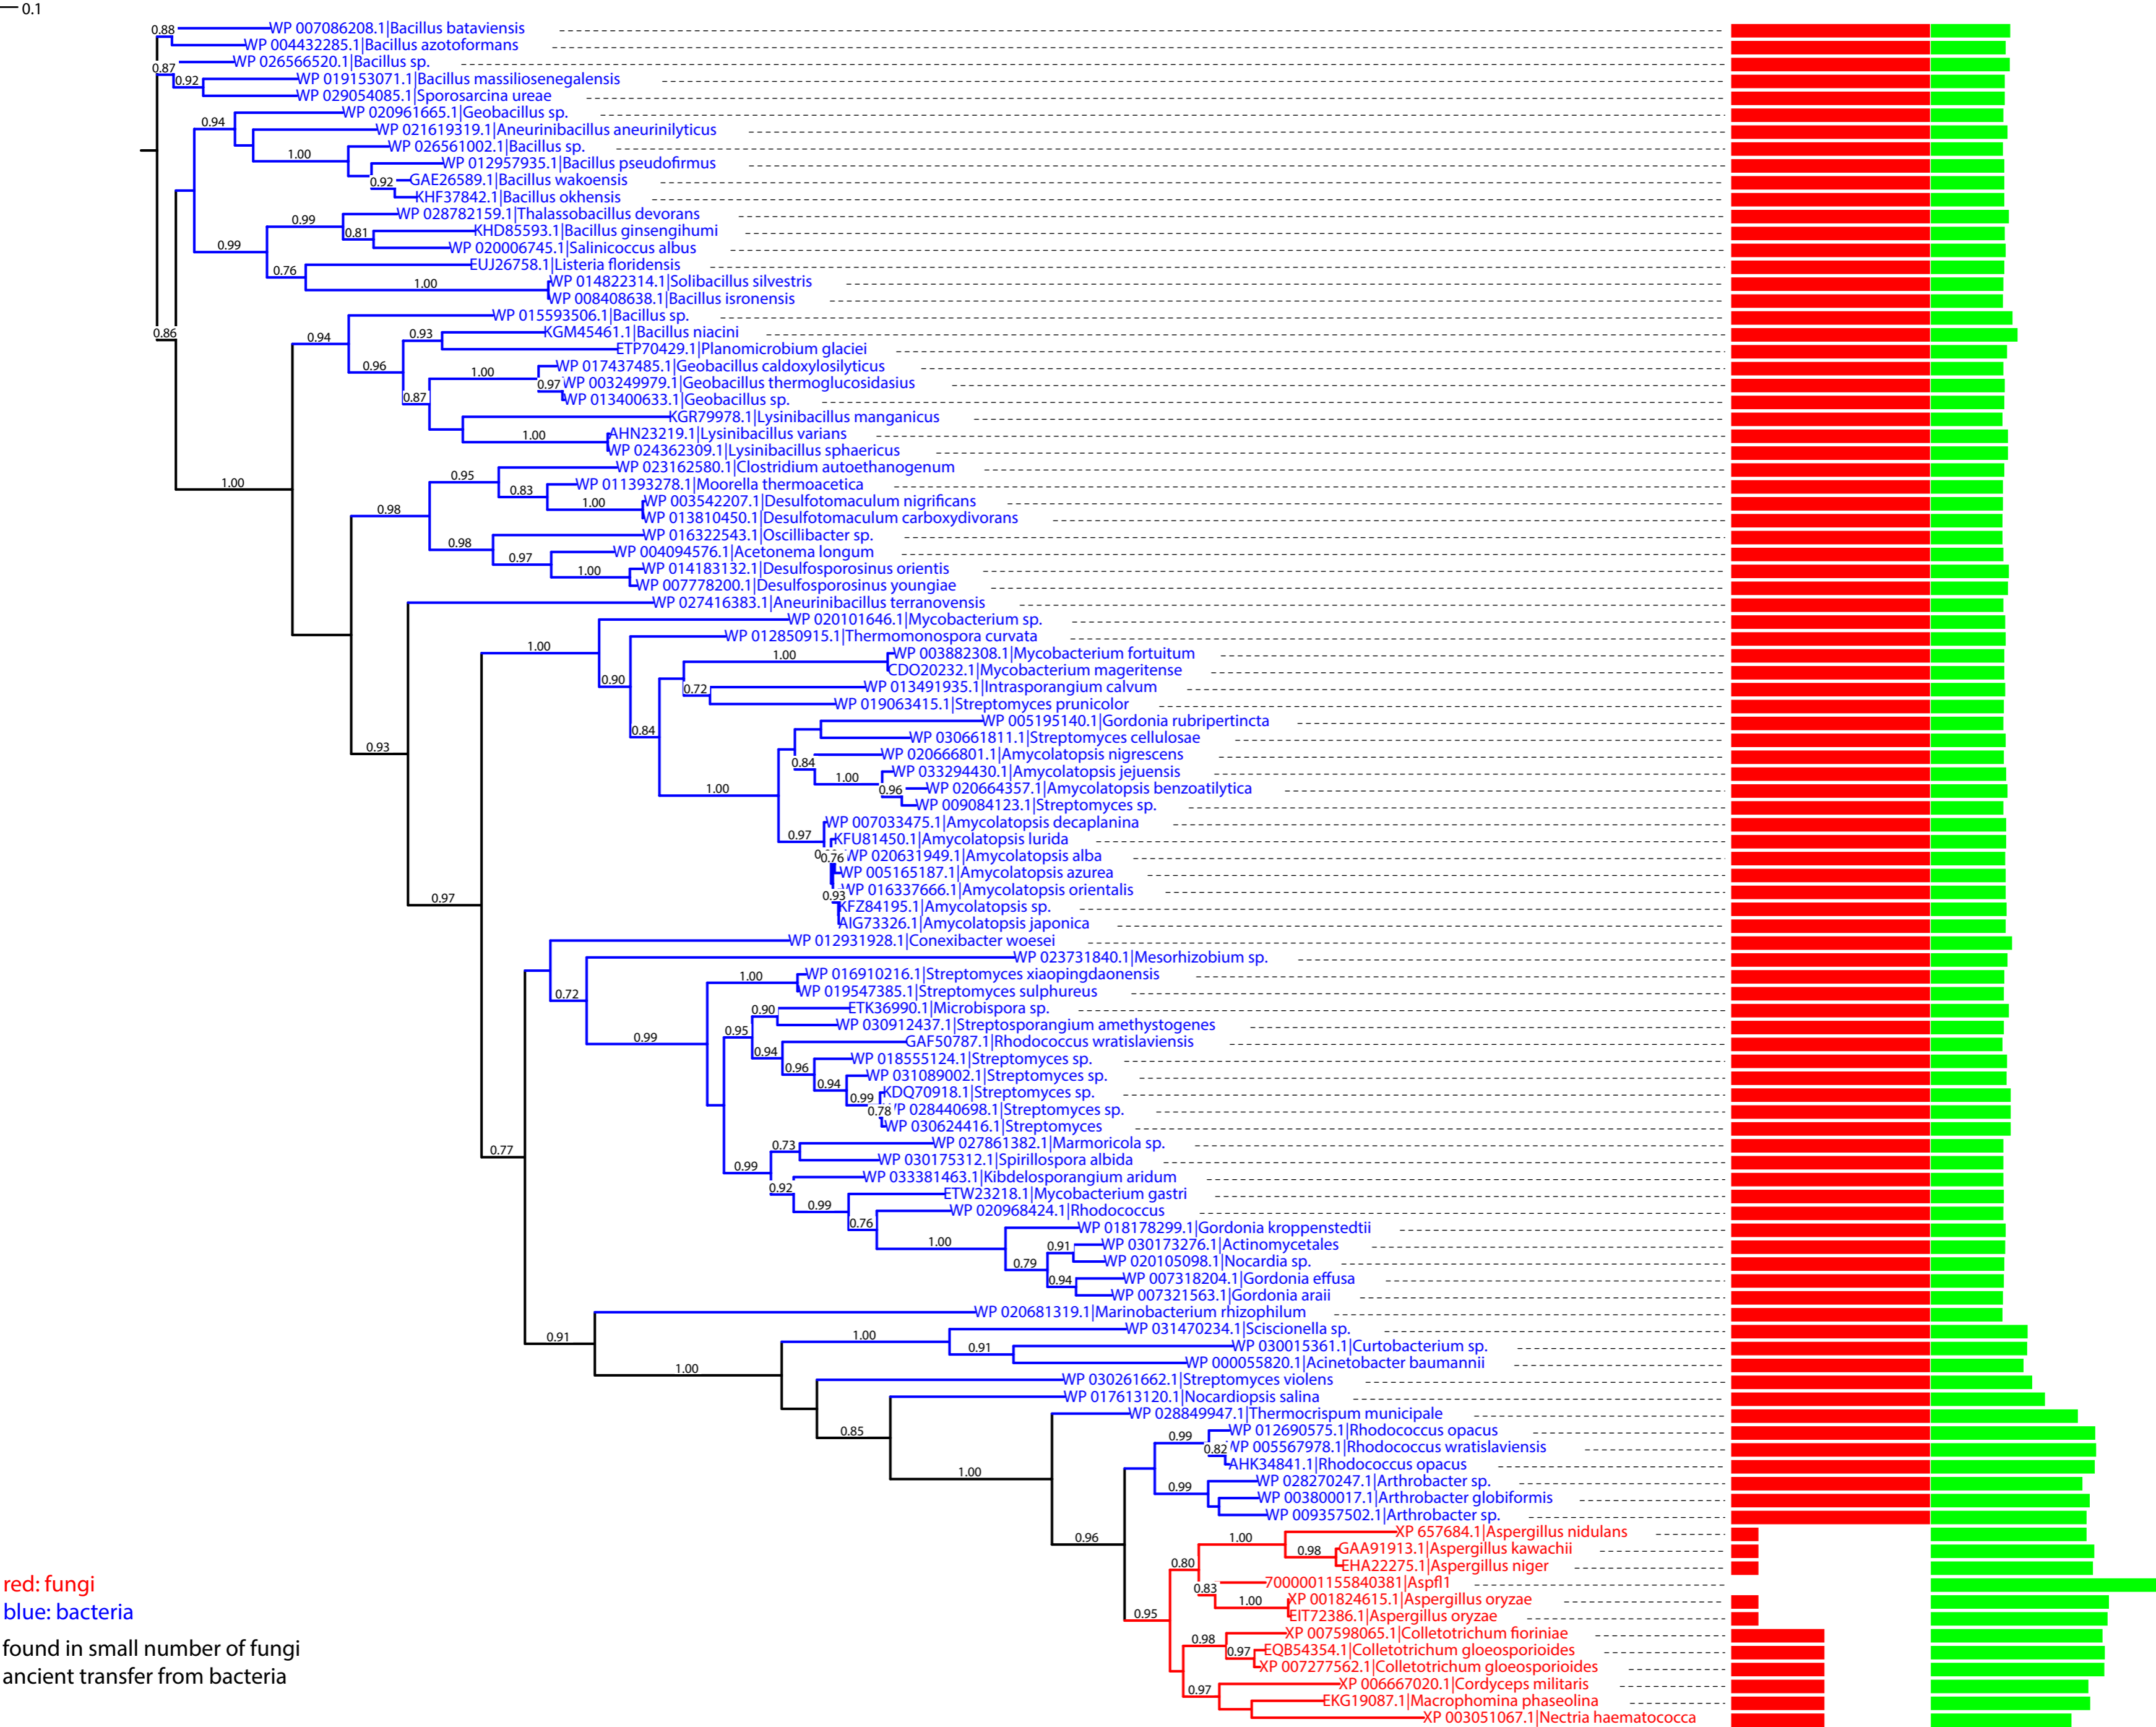

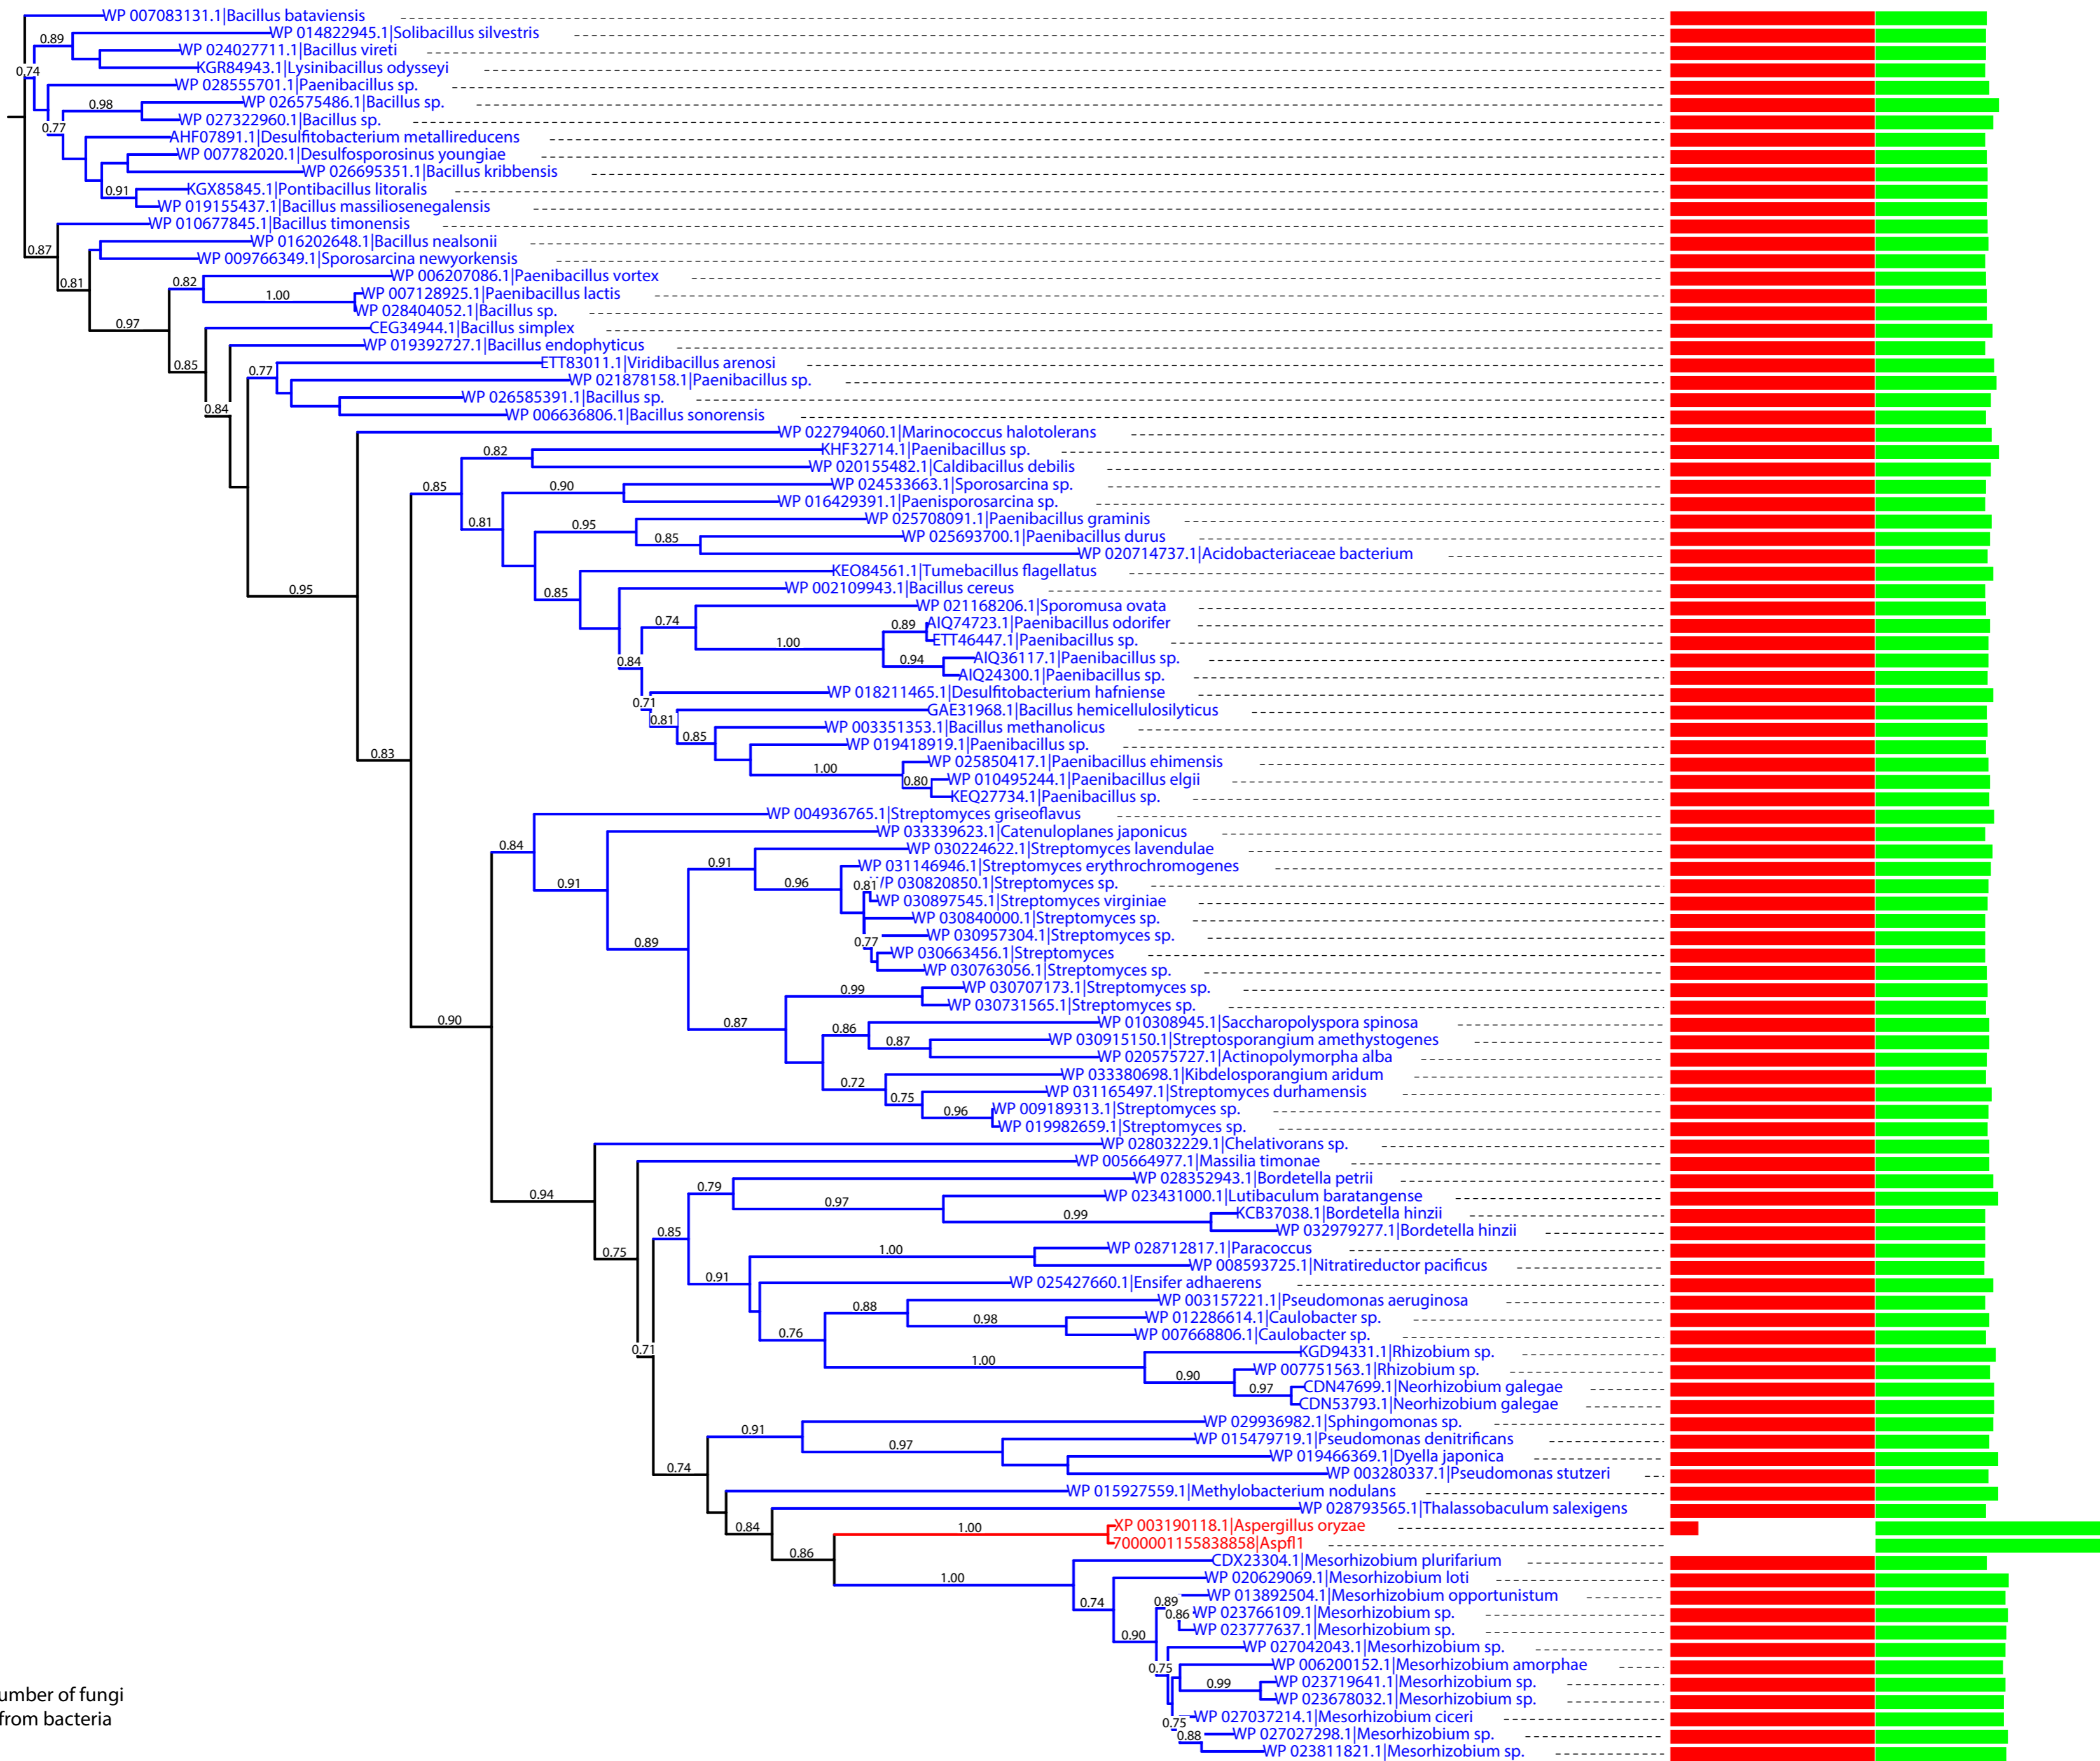

red: fungi  
blue: bacteria

found in small number of fungi  
ancient transfer from bacteria

0.1

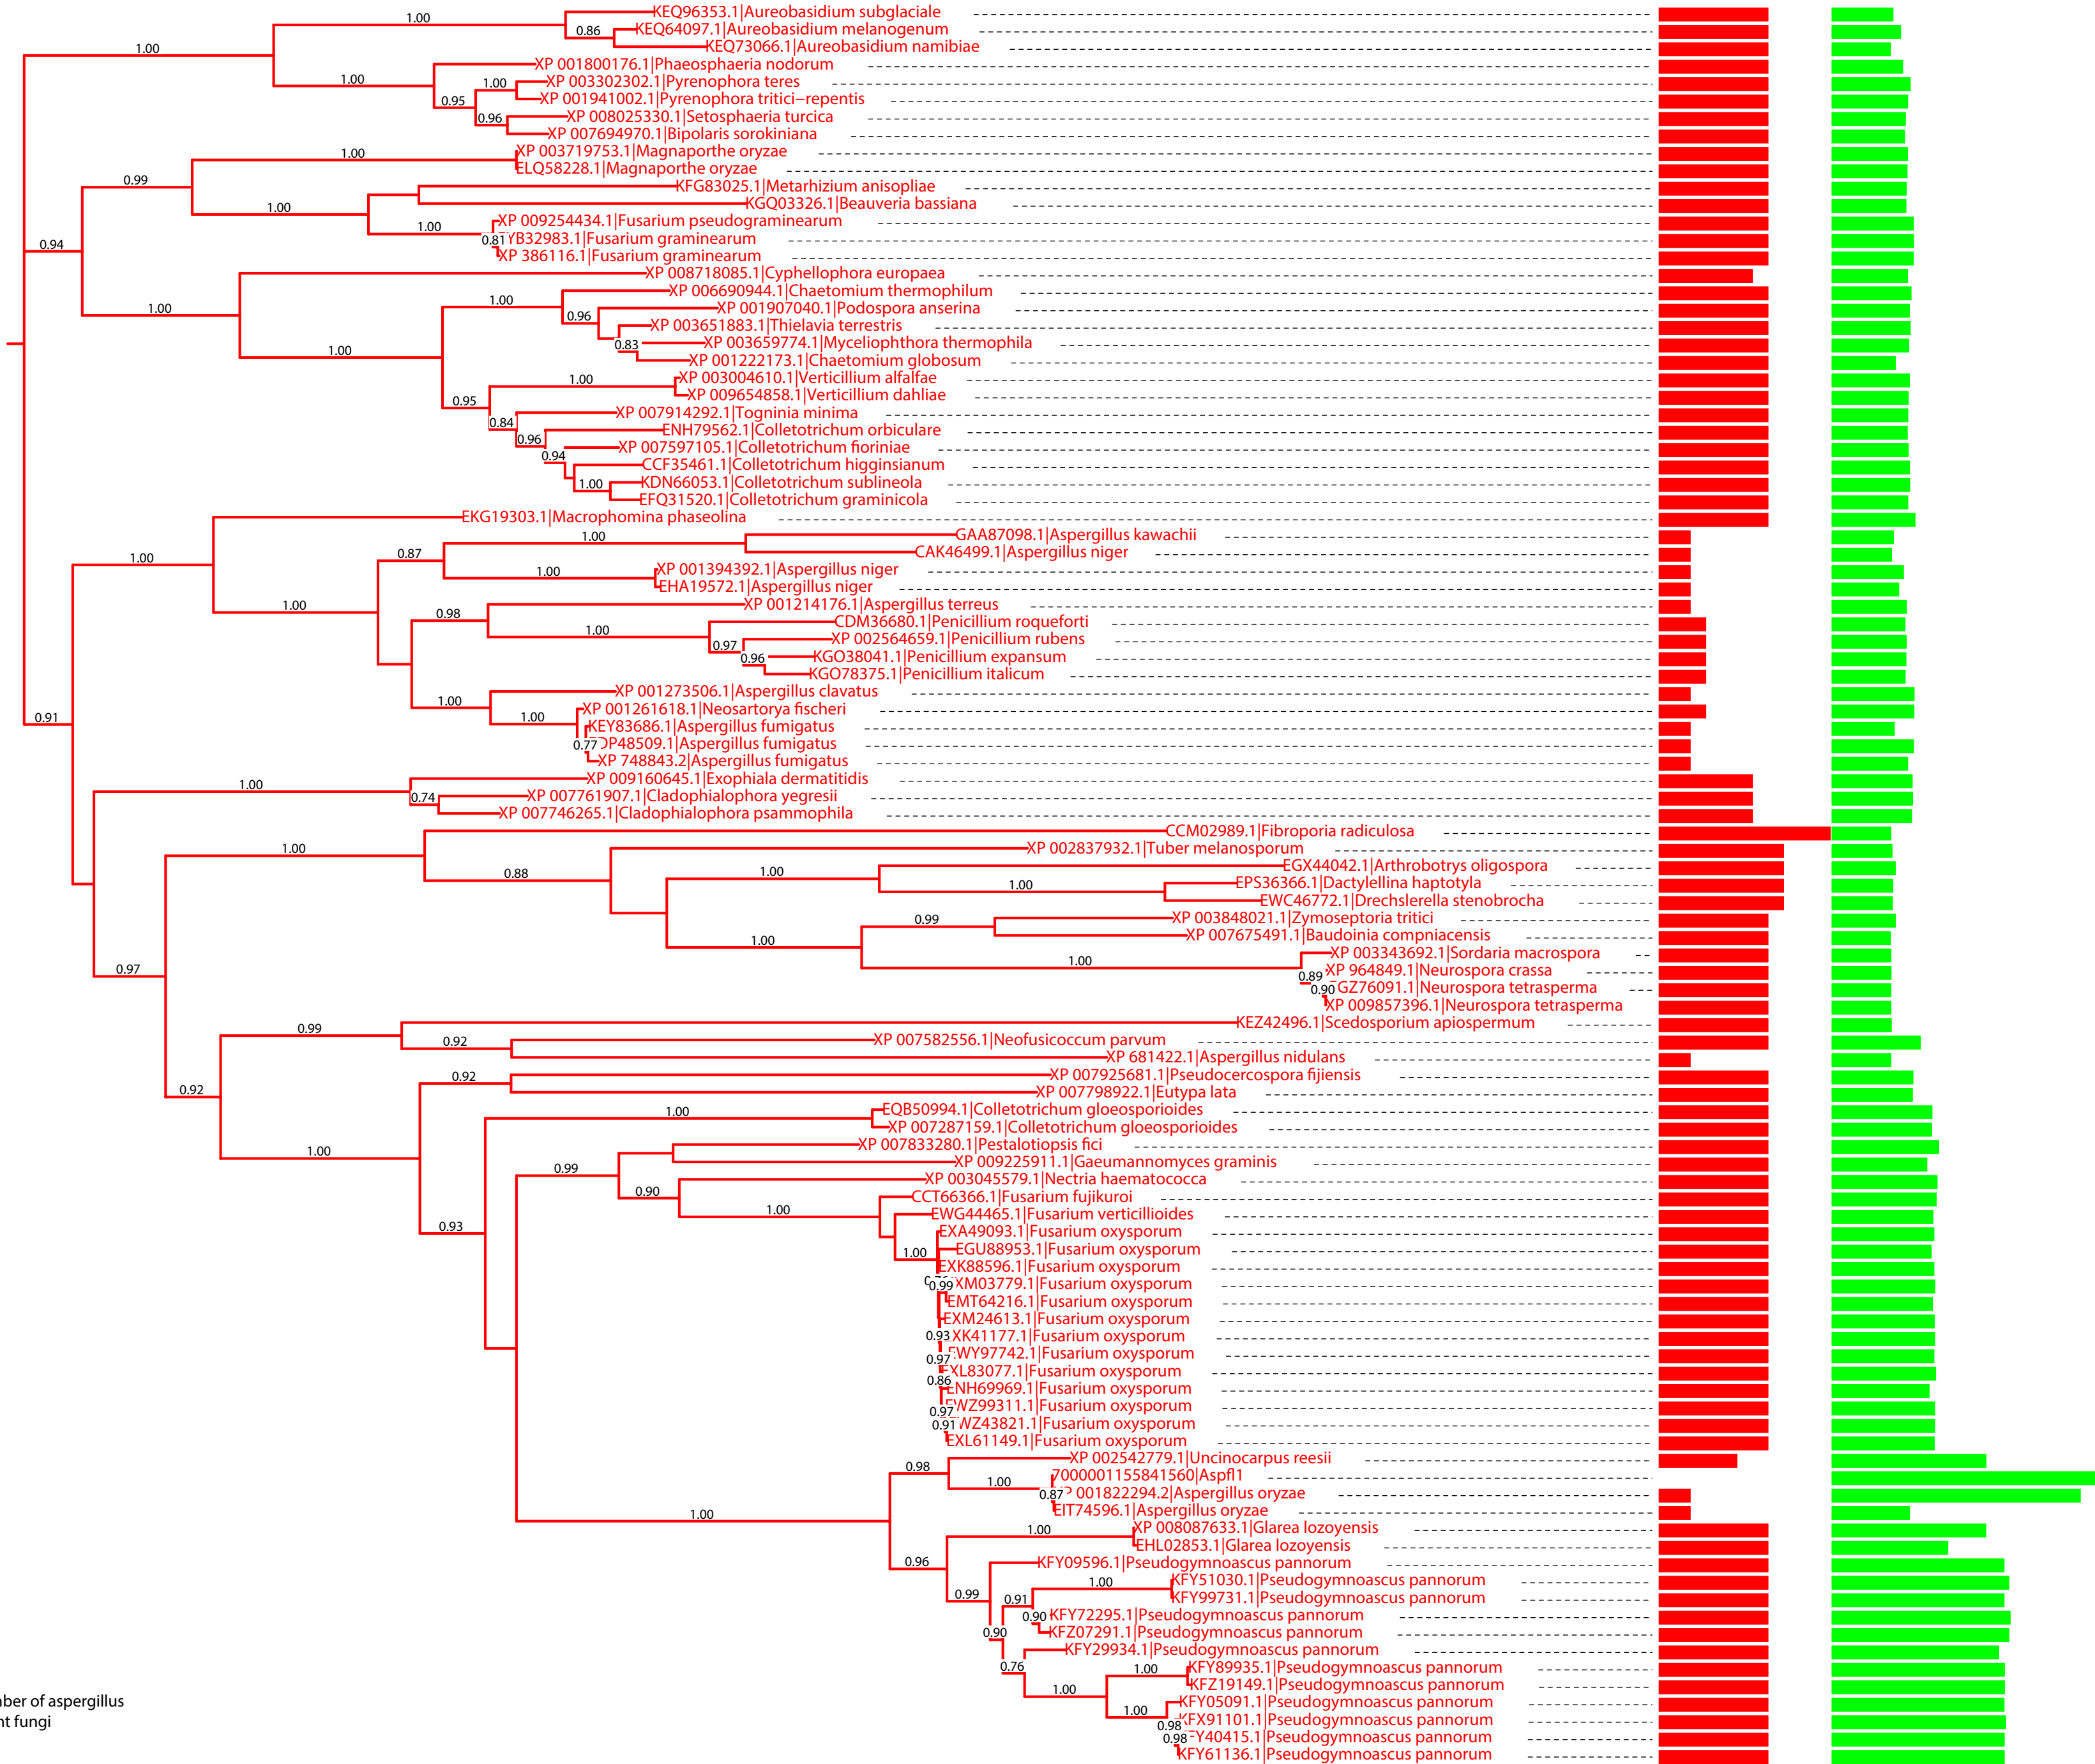

red: fungi

found in small number of aspergillus

transfer from distant fungi

0.1

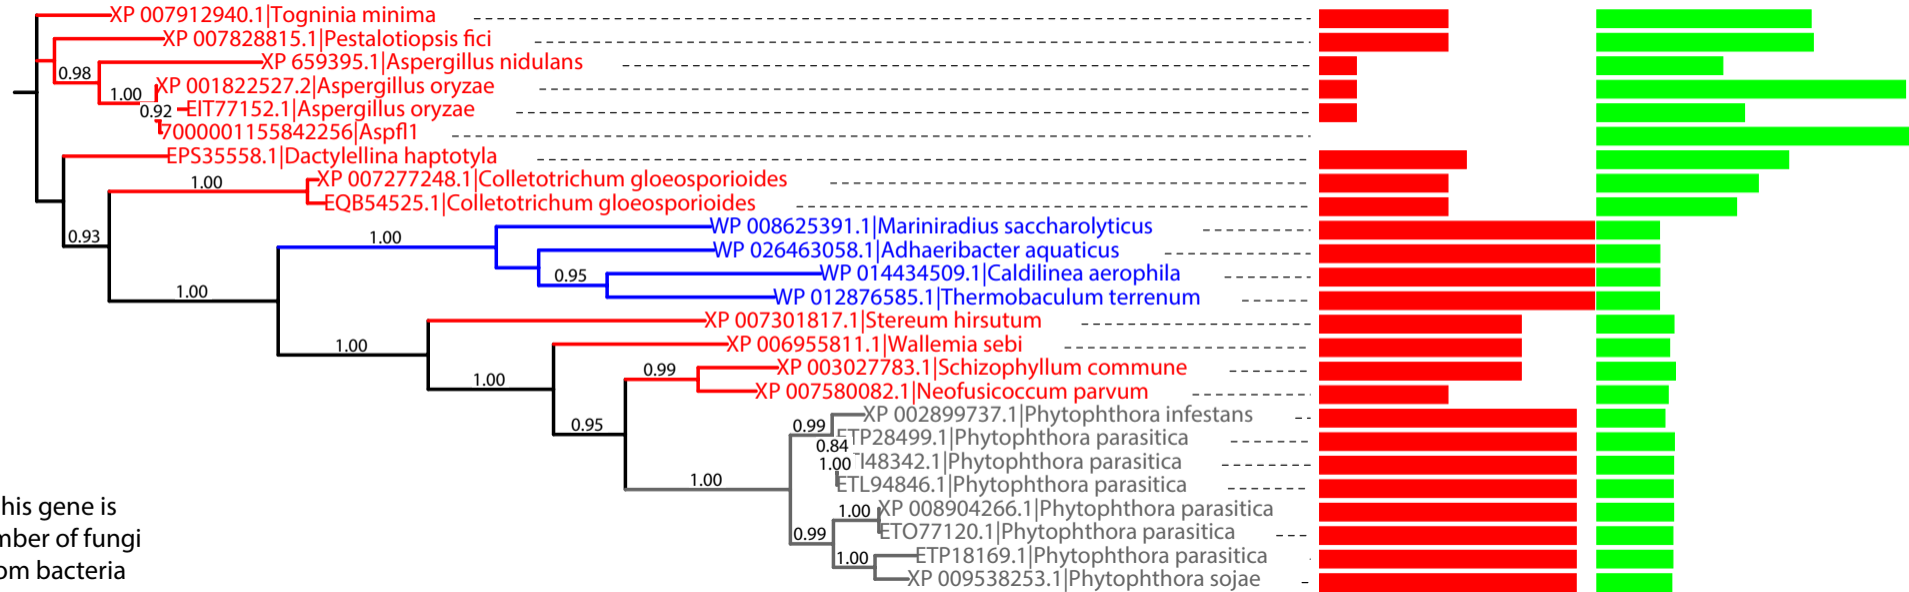

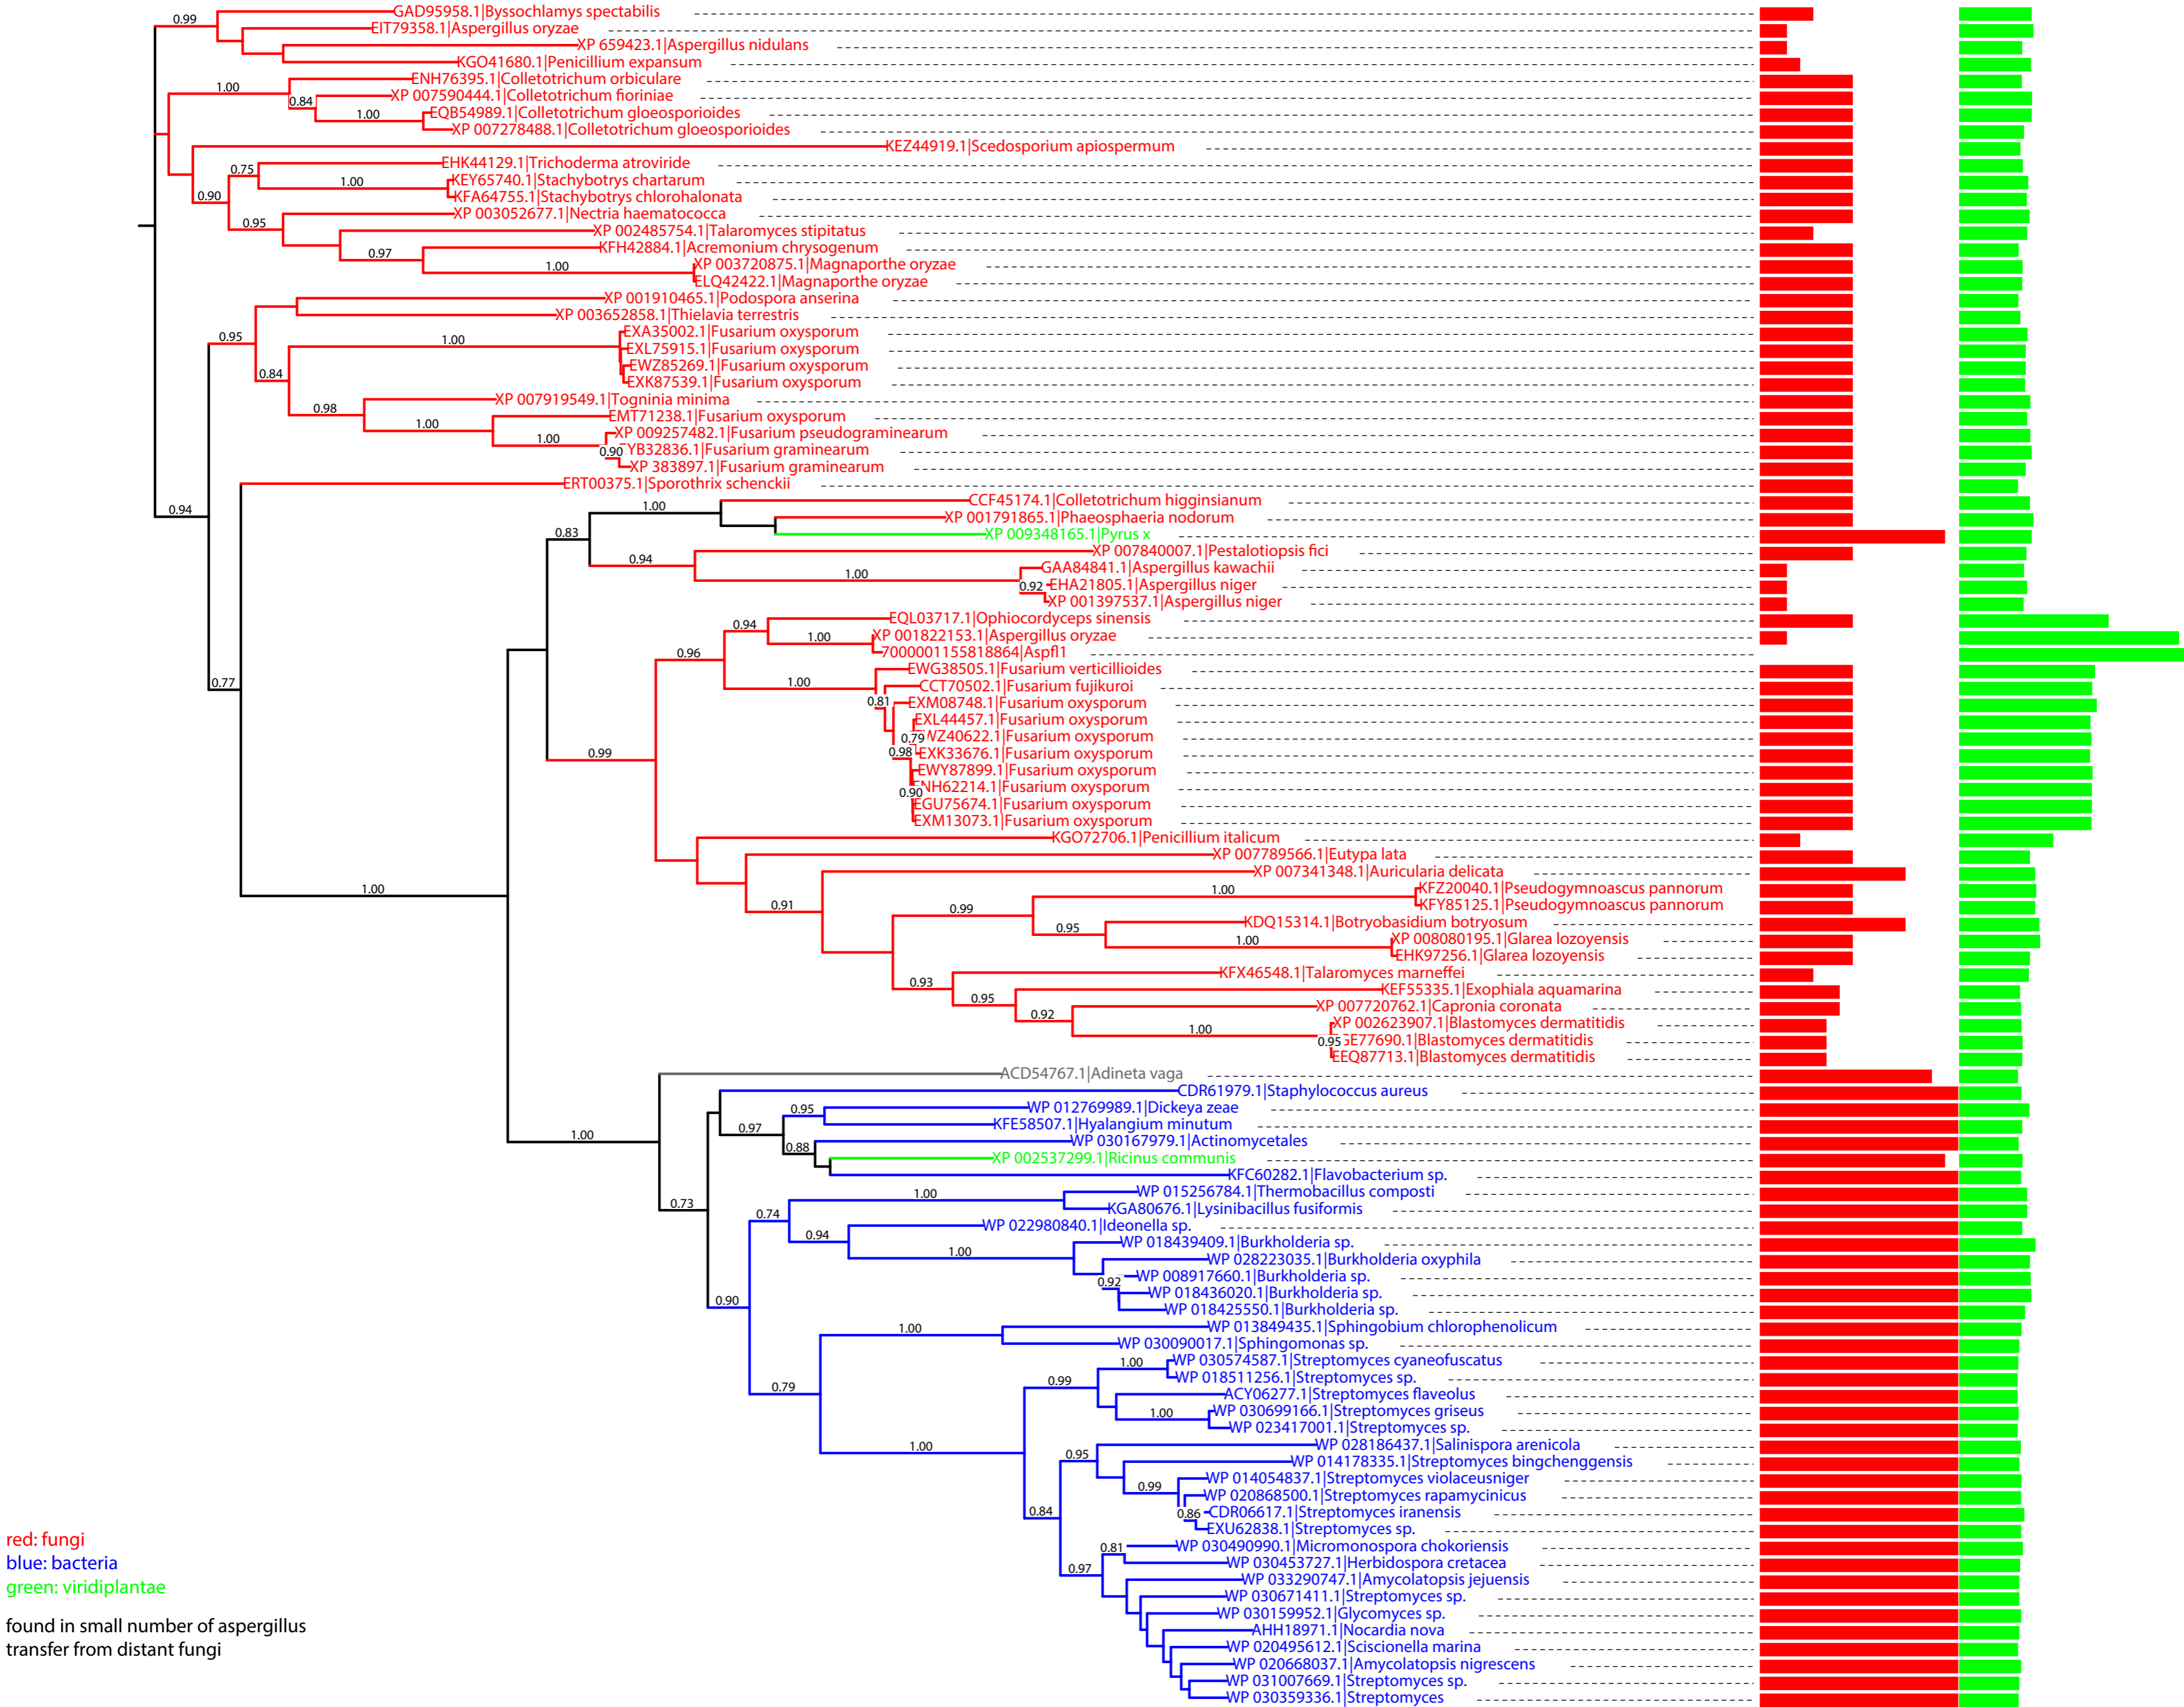

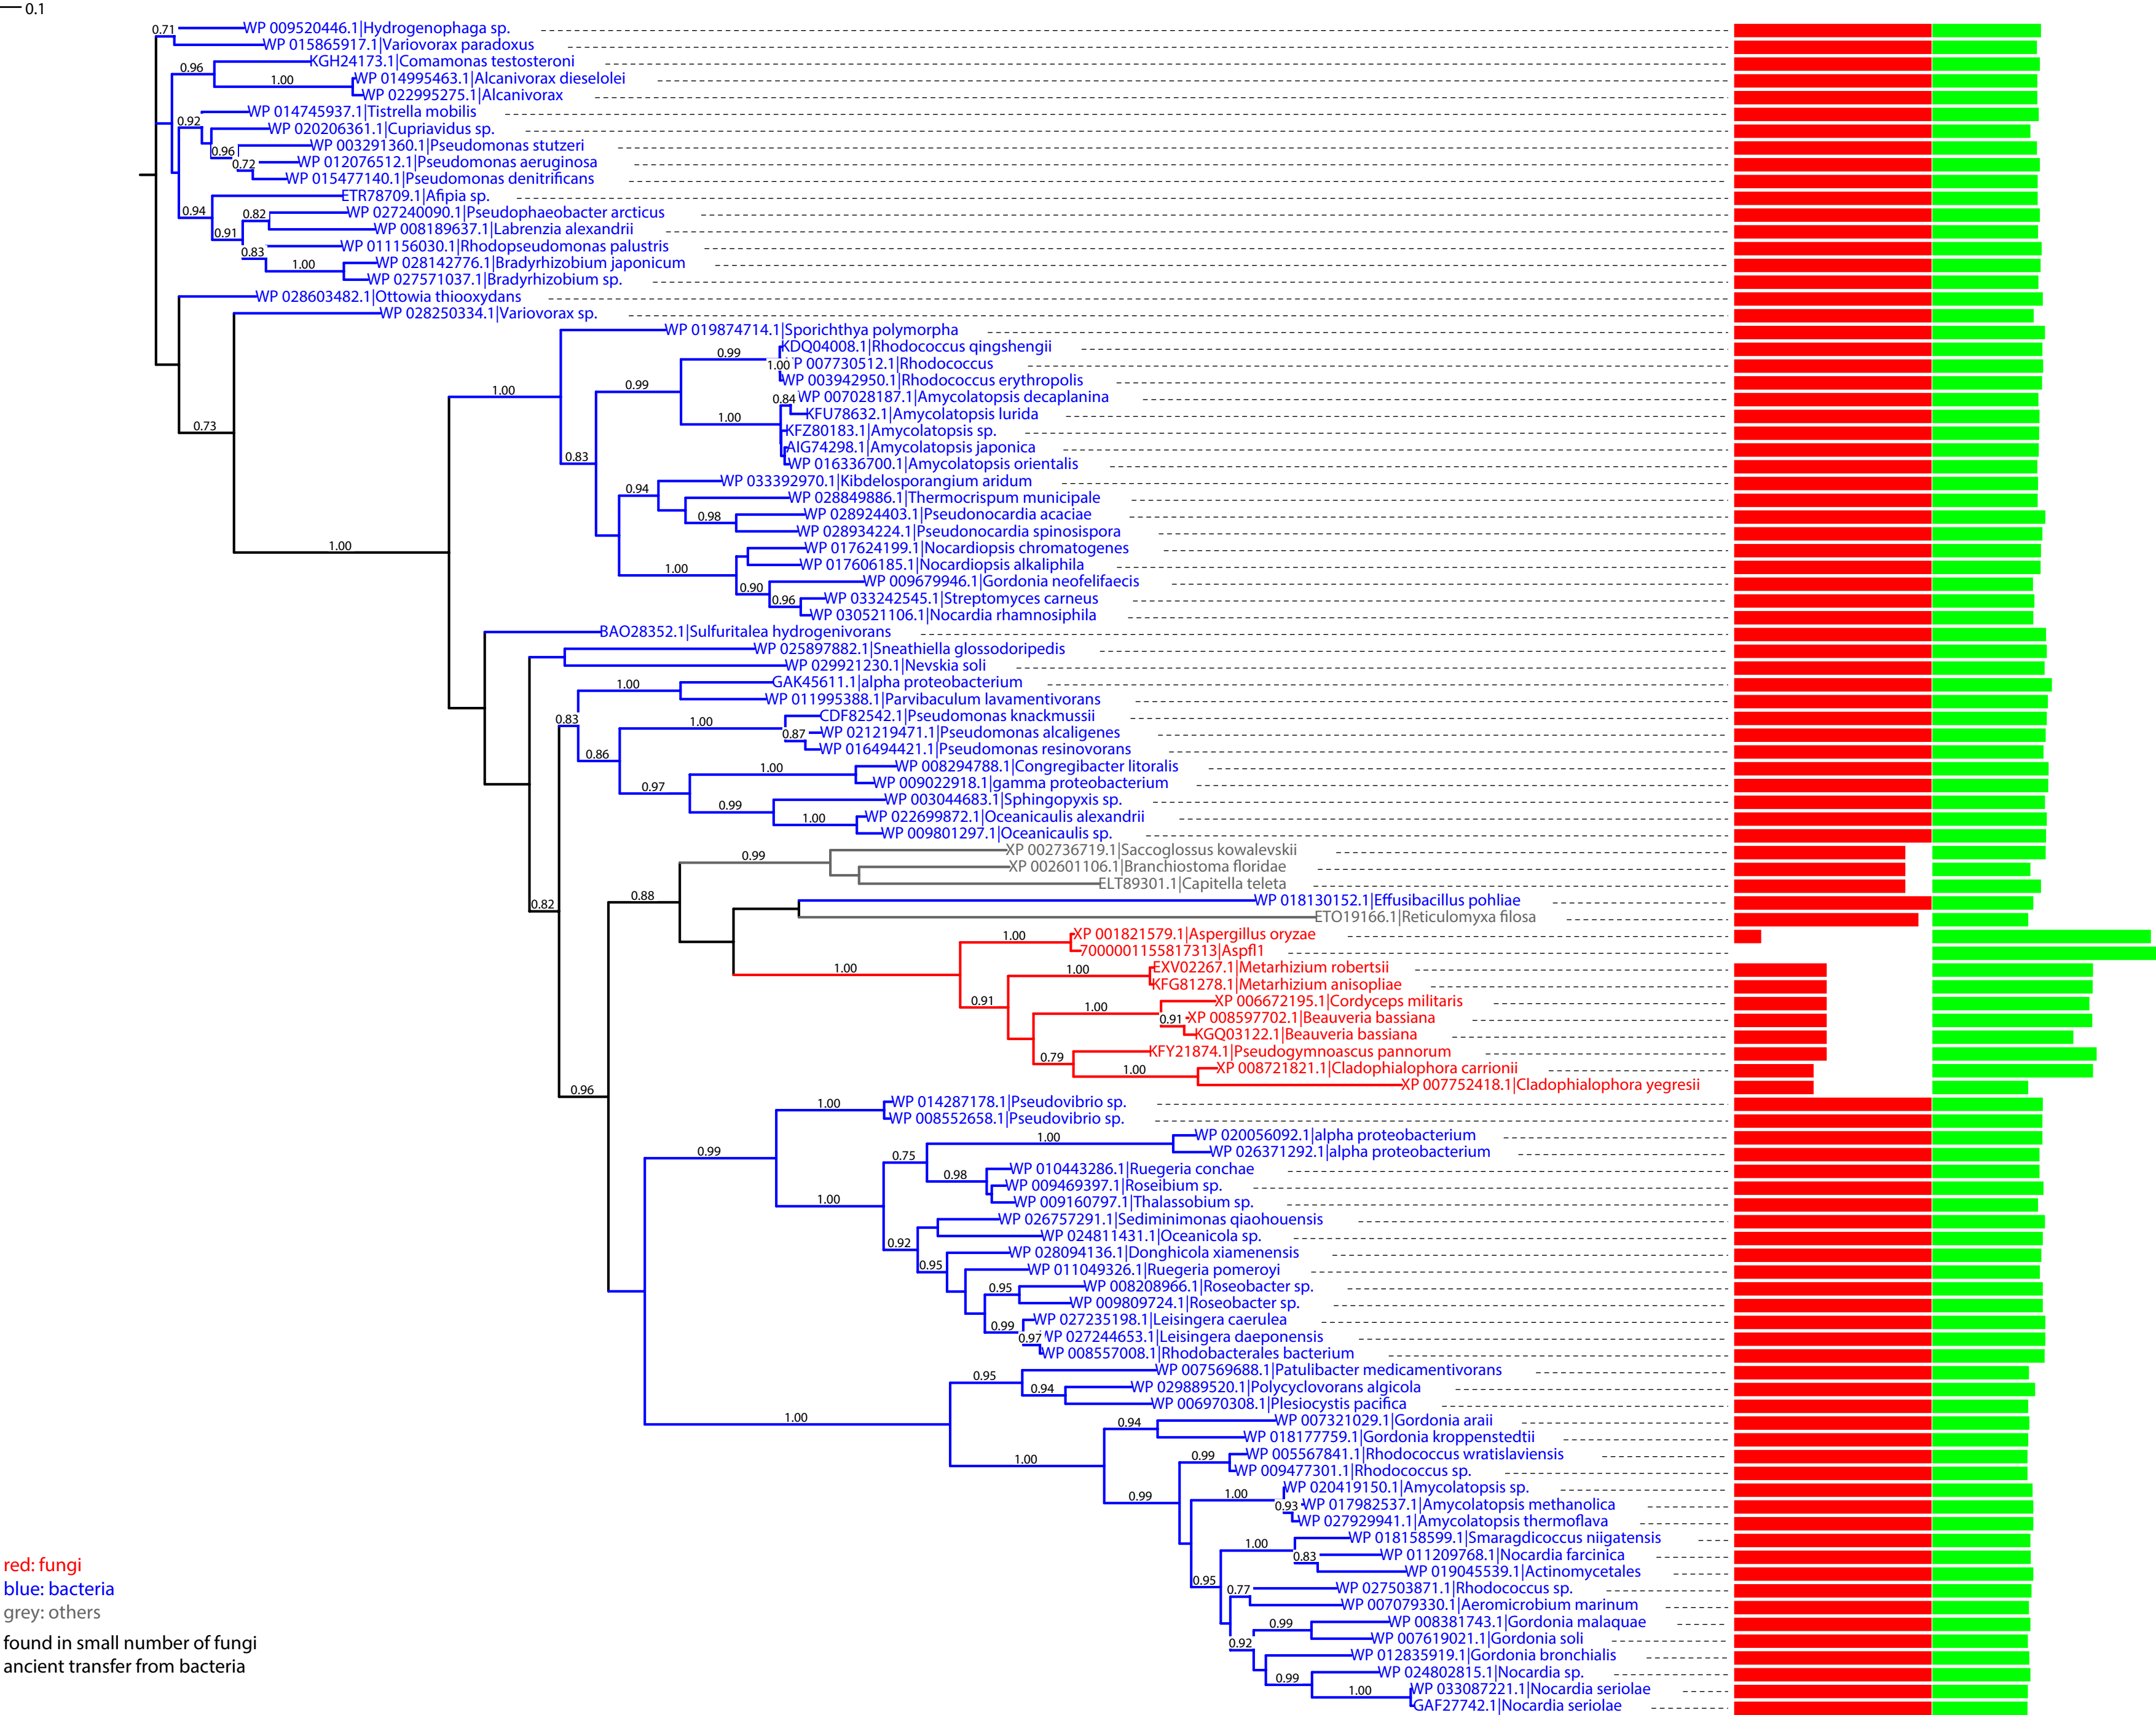

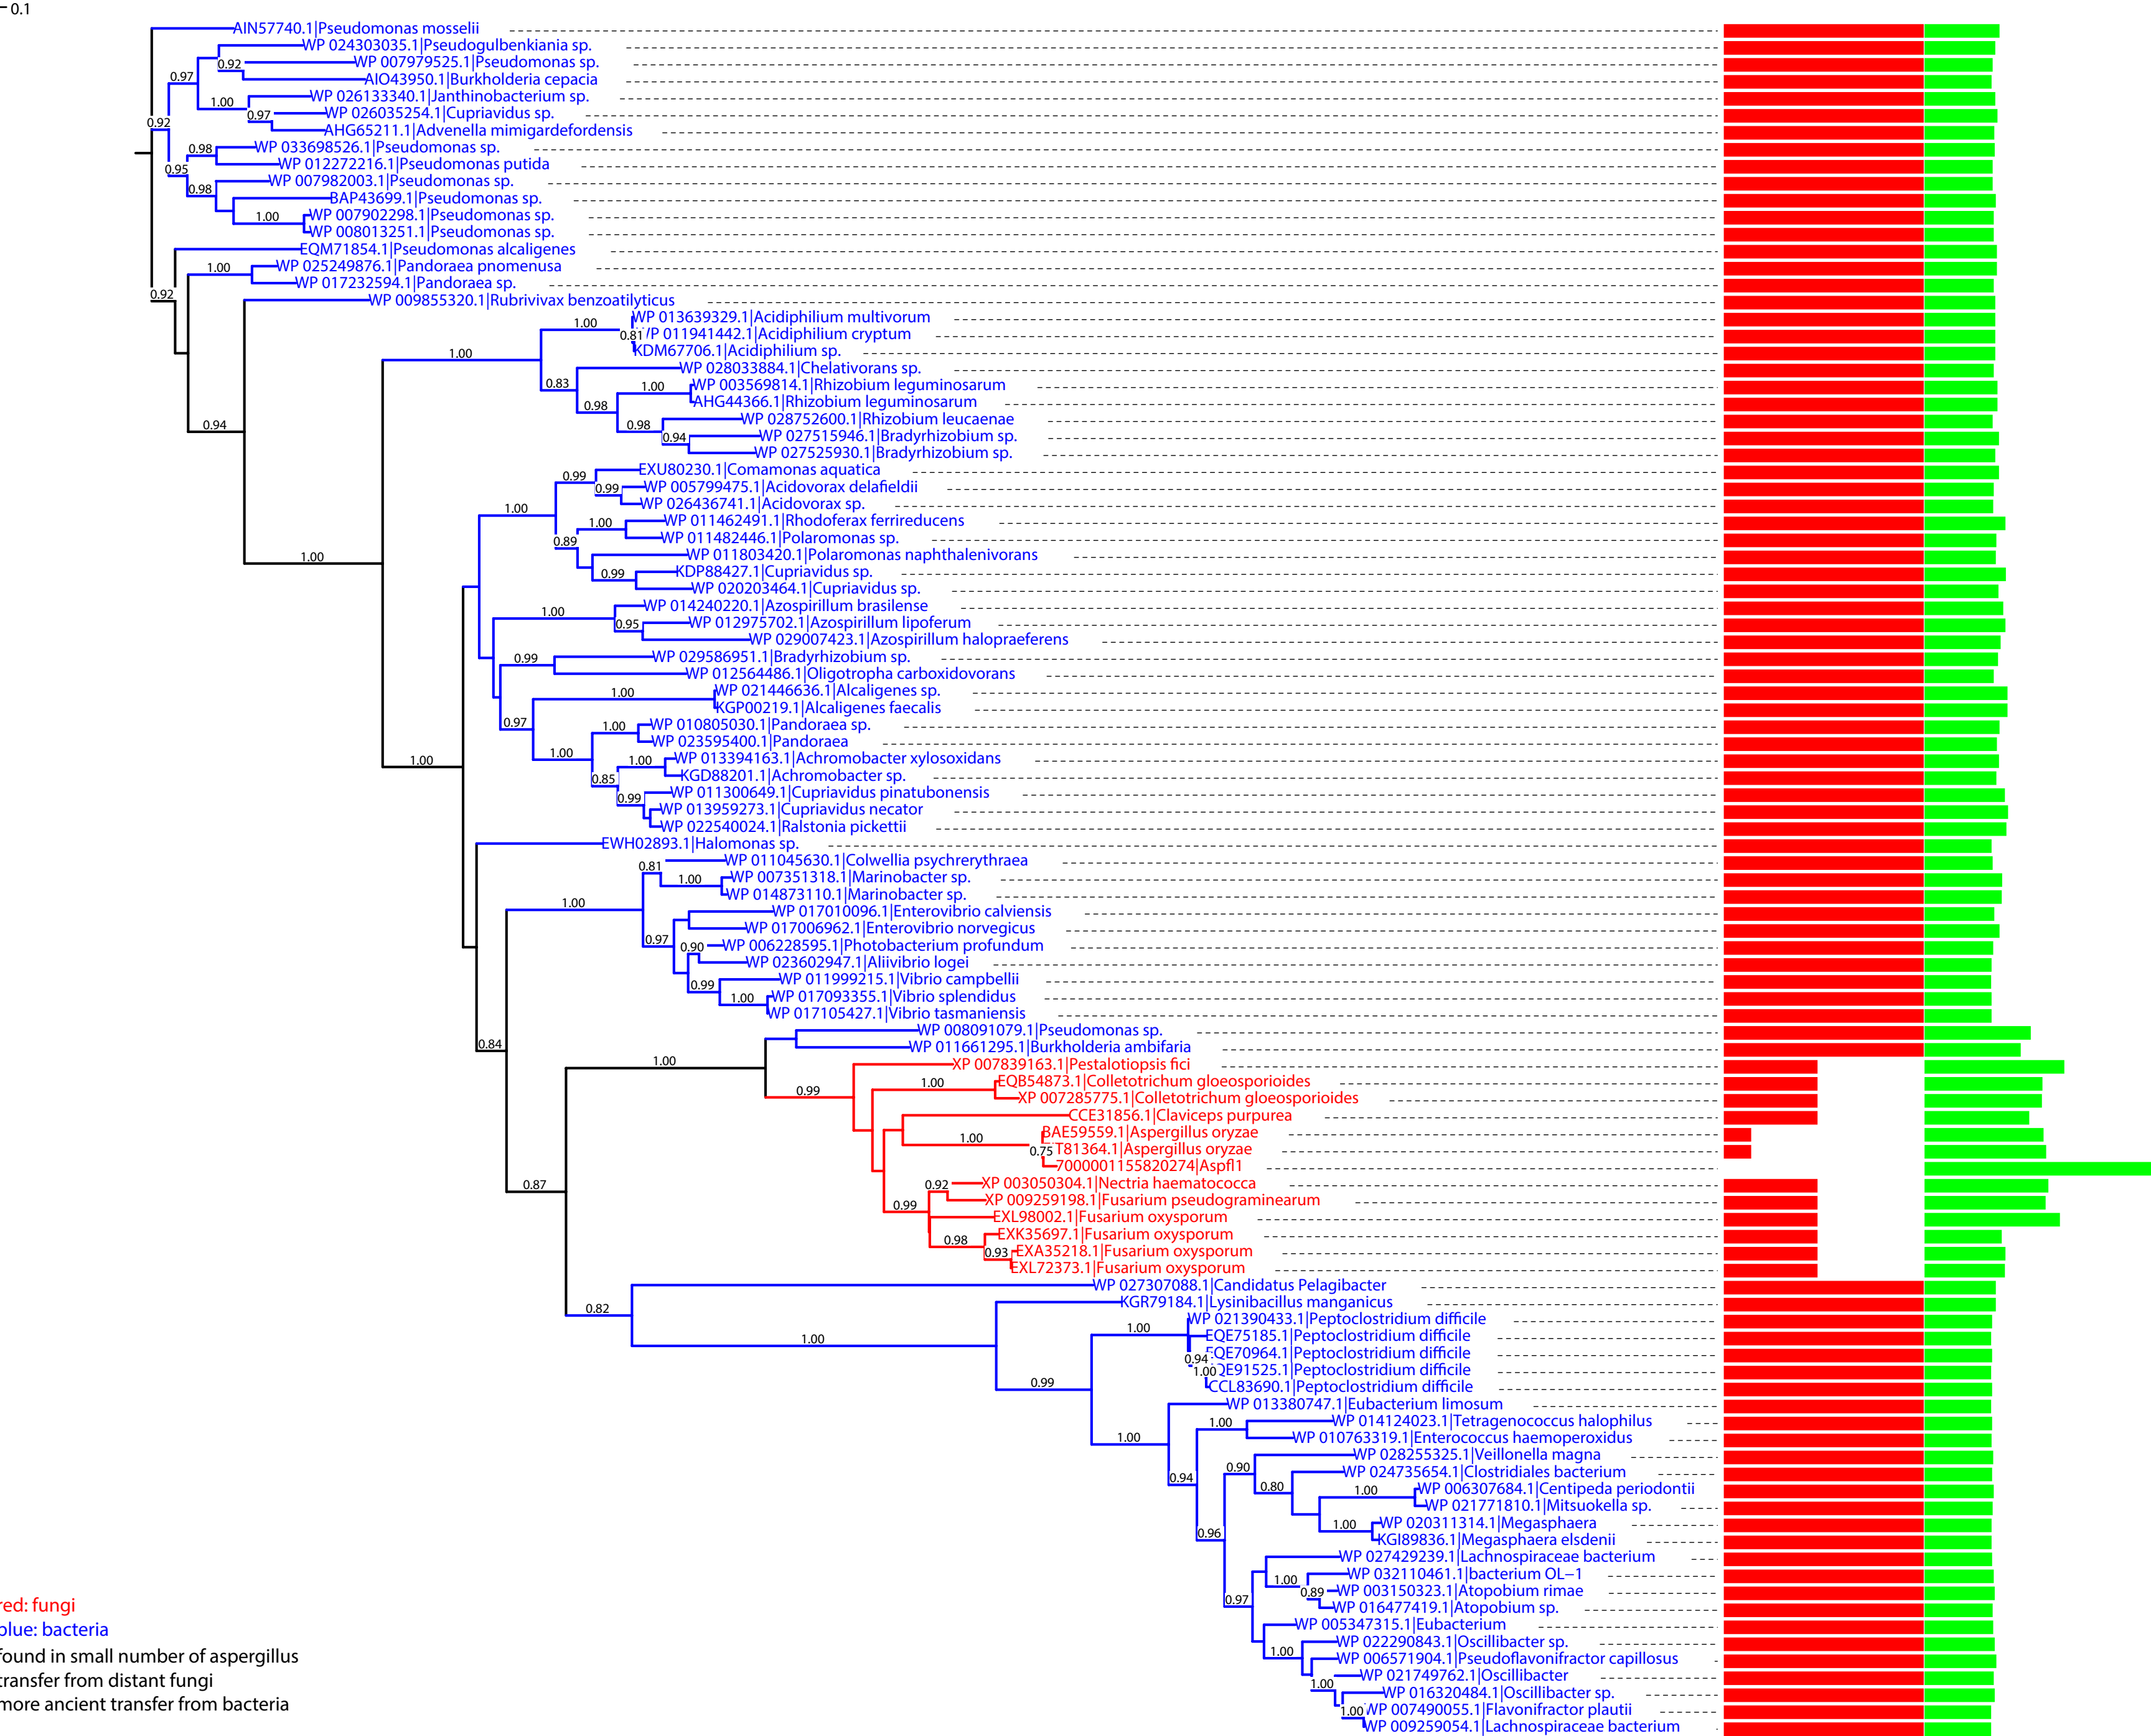

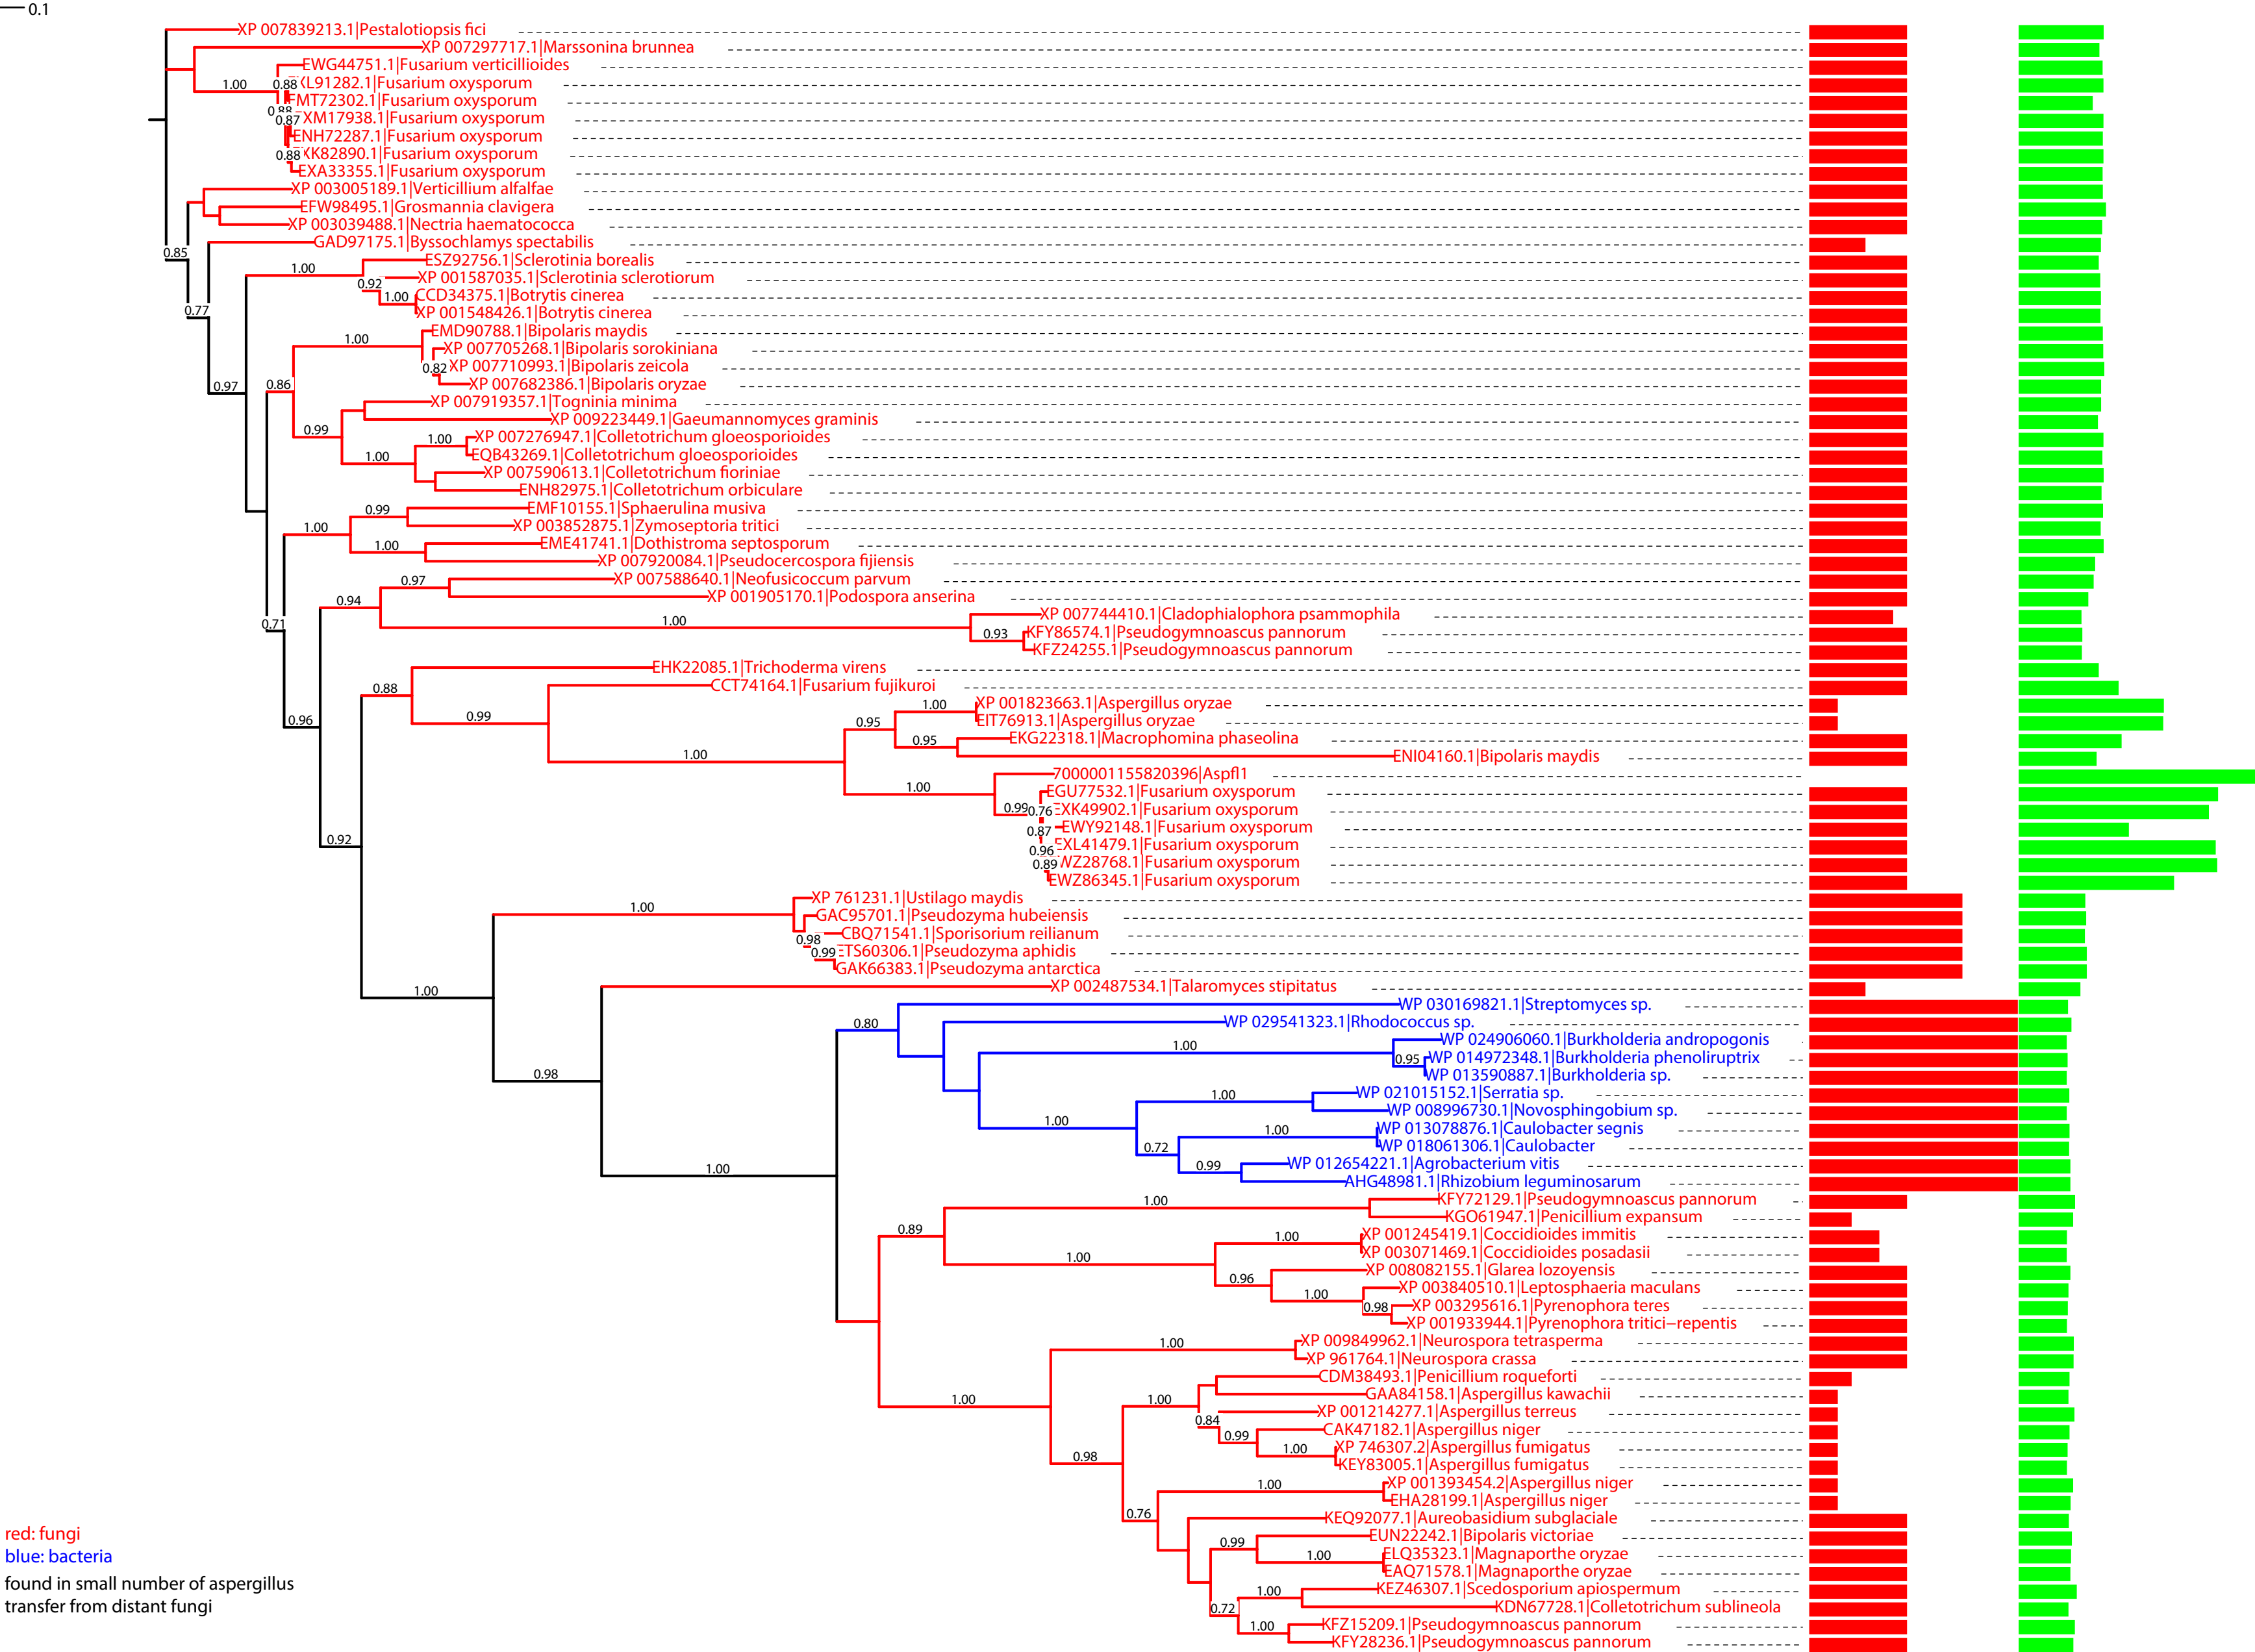

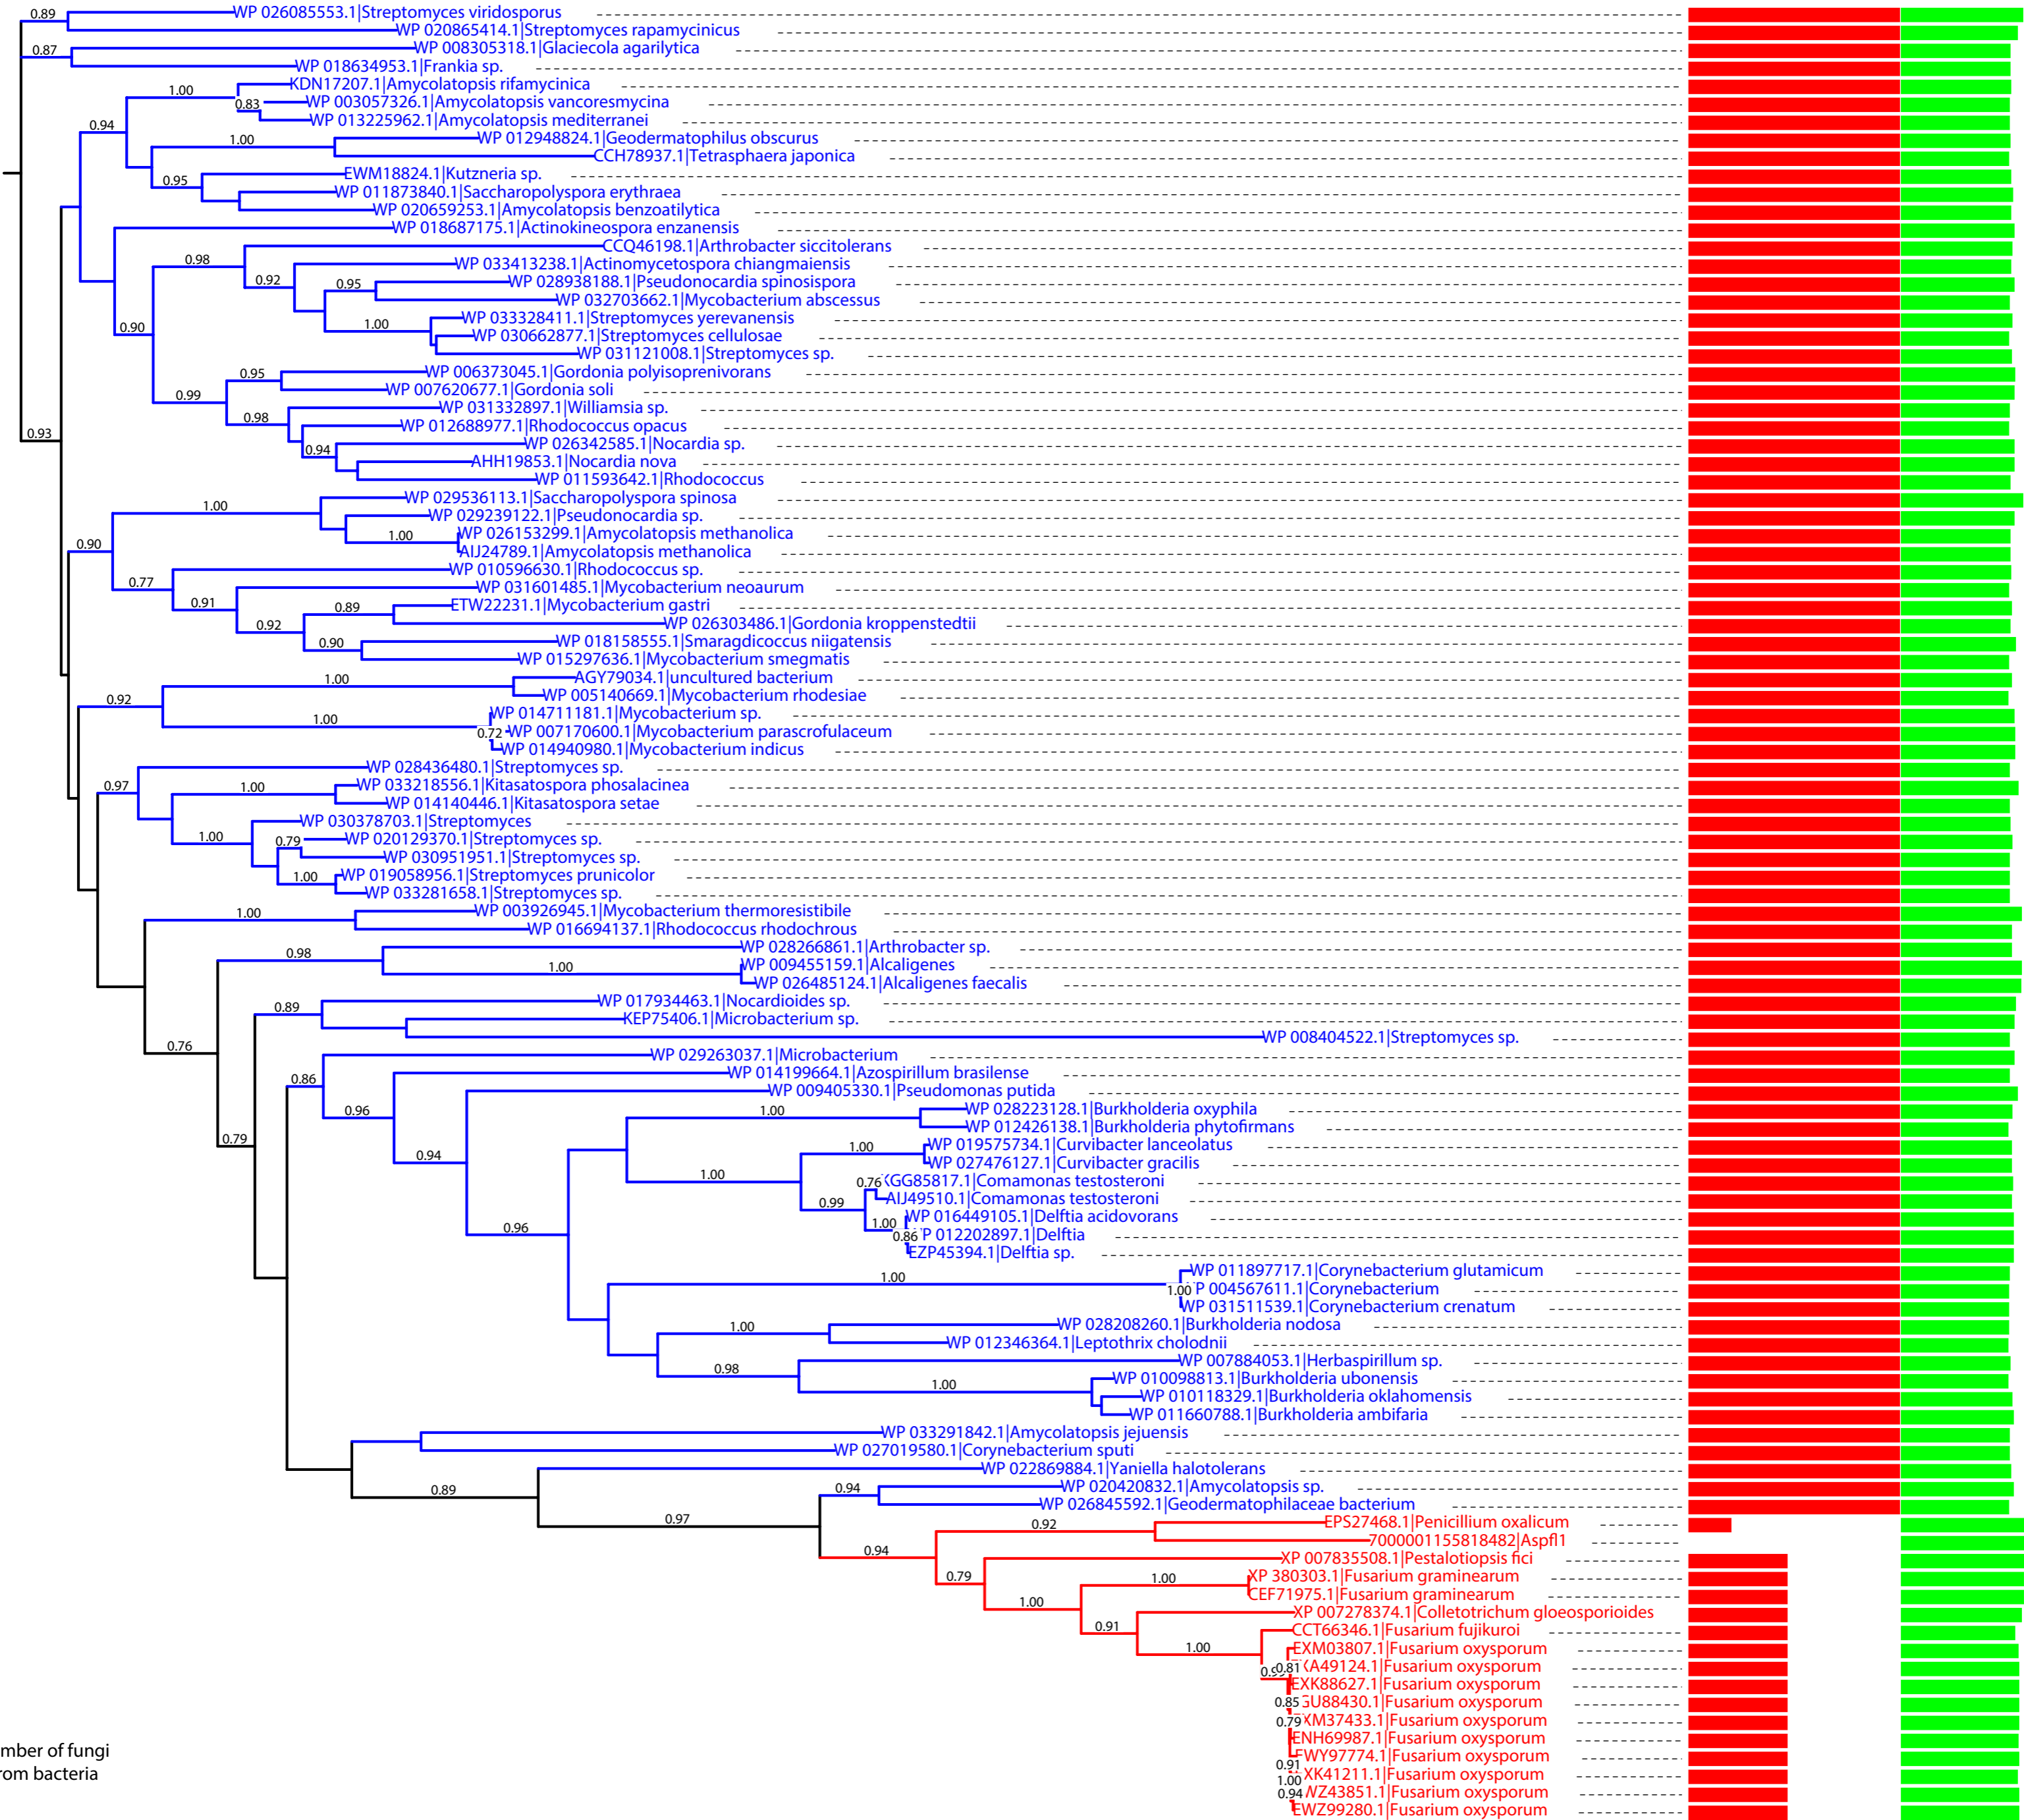

red: fungi  
blue: bacteria  
found in small number of fungi  
ancient transfer from bacteria

0.1

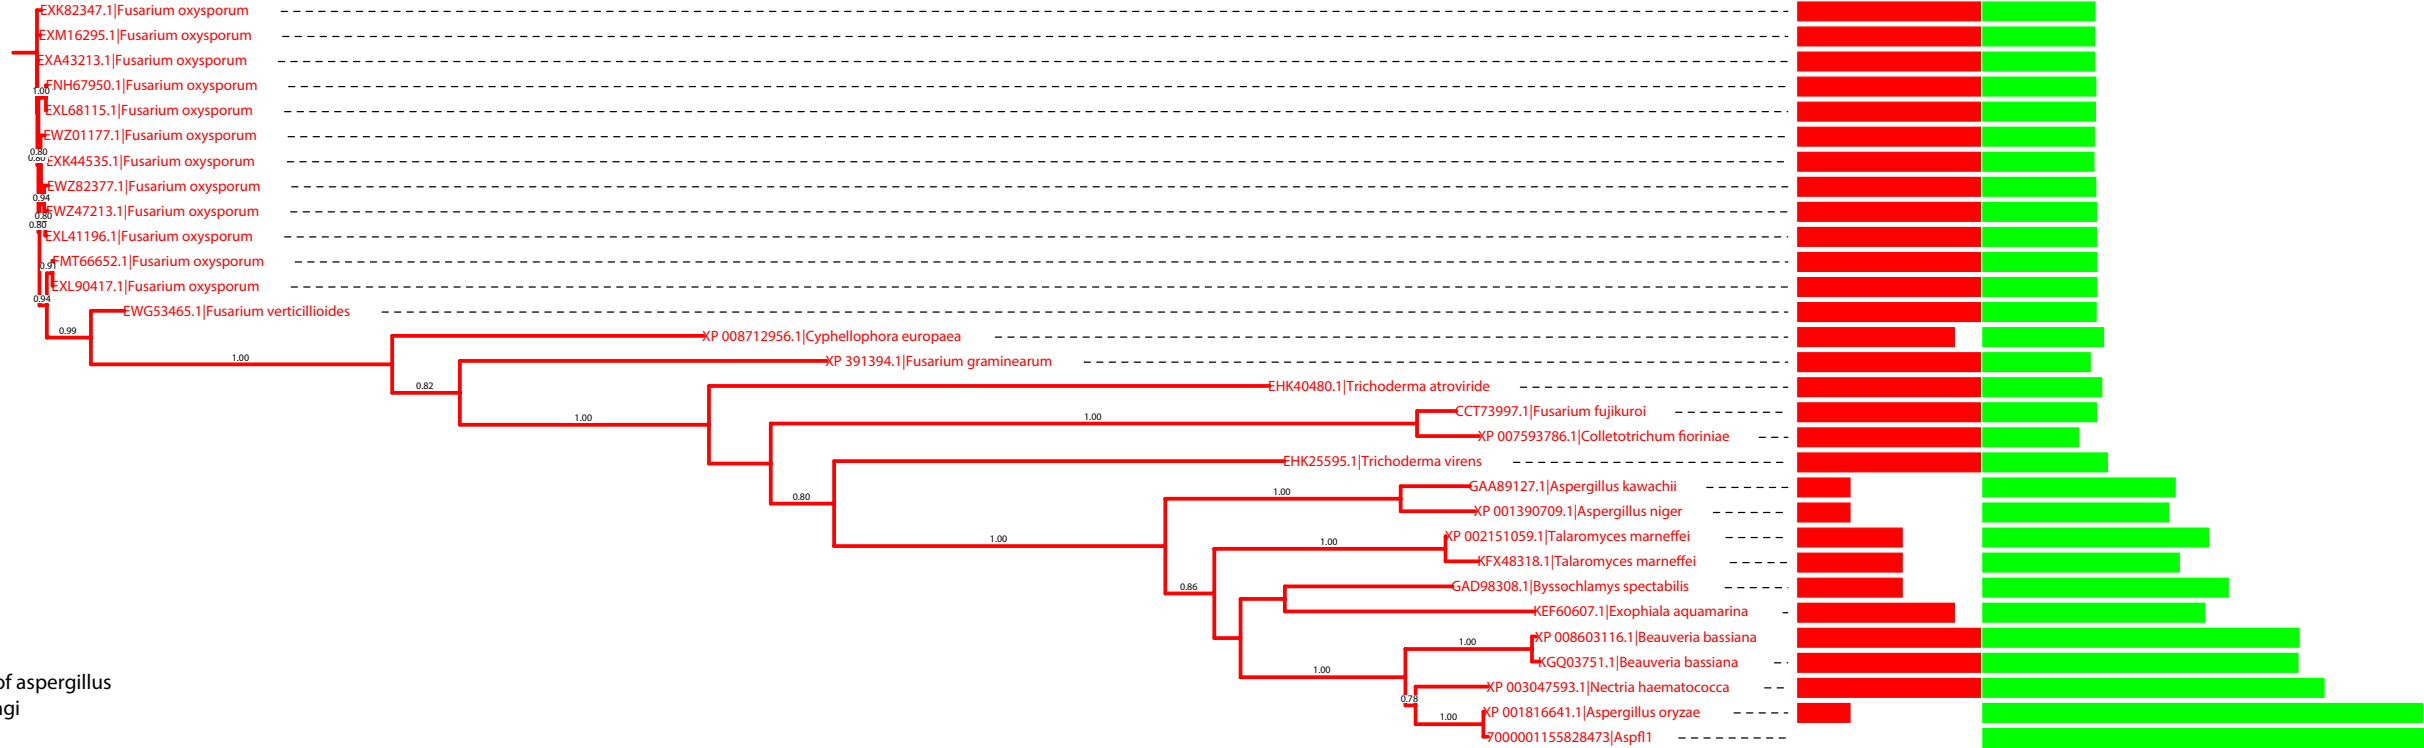

red: fungi

found in small number of aspergillus  
transfer from distant fungi

0.1

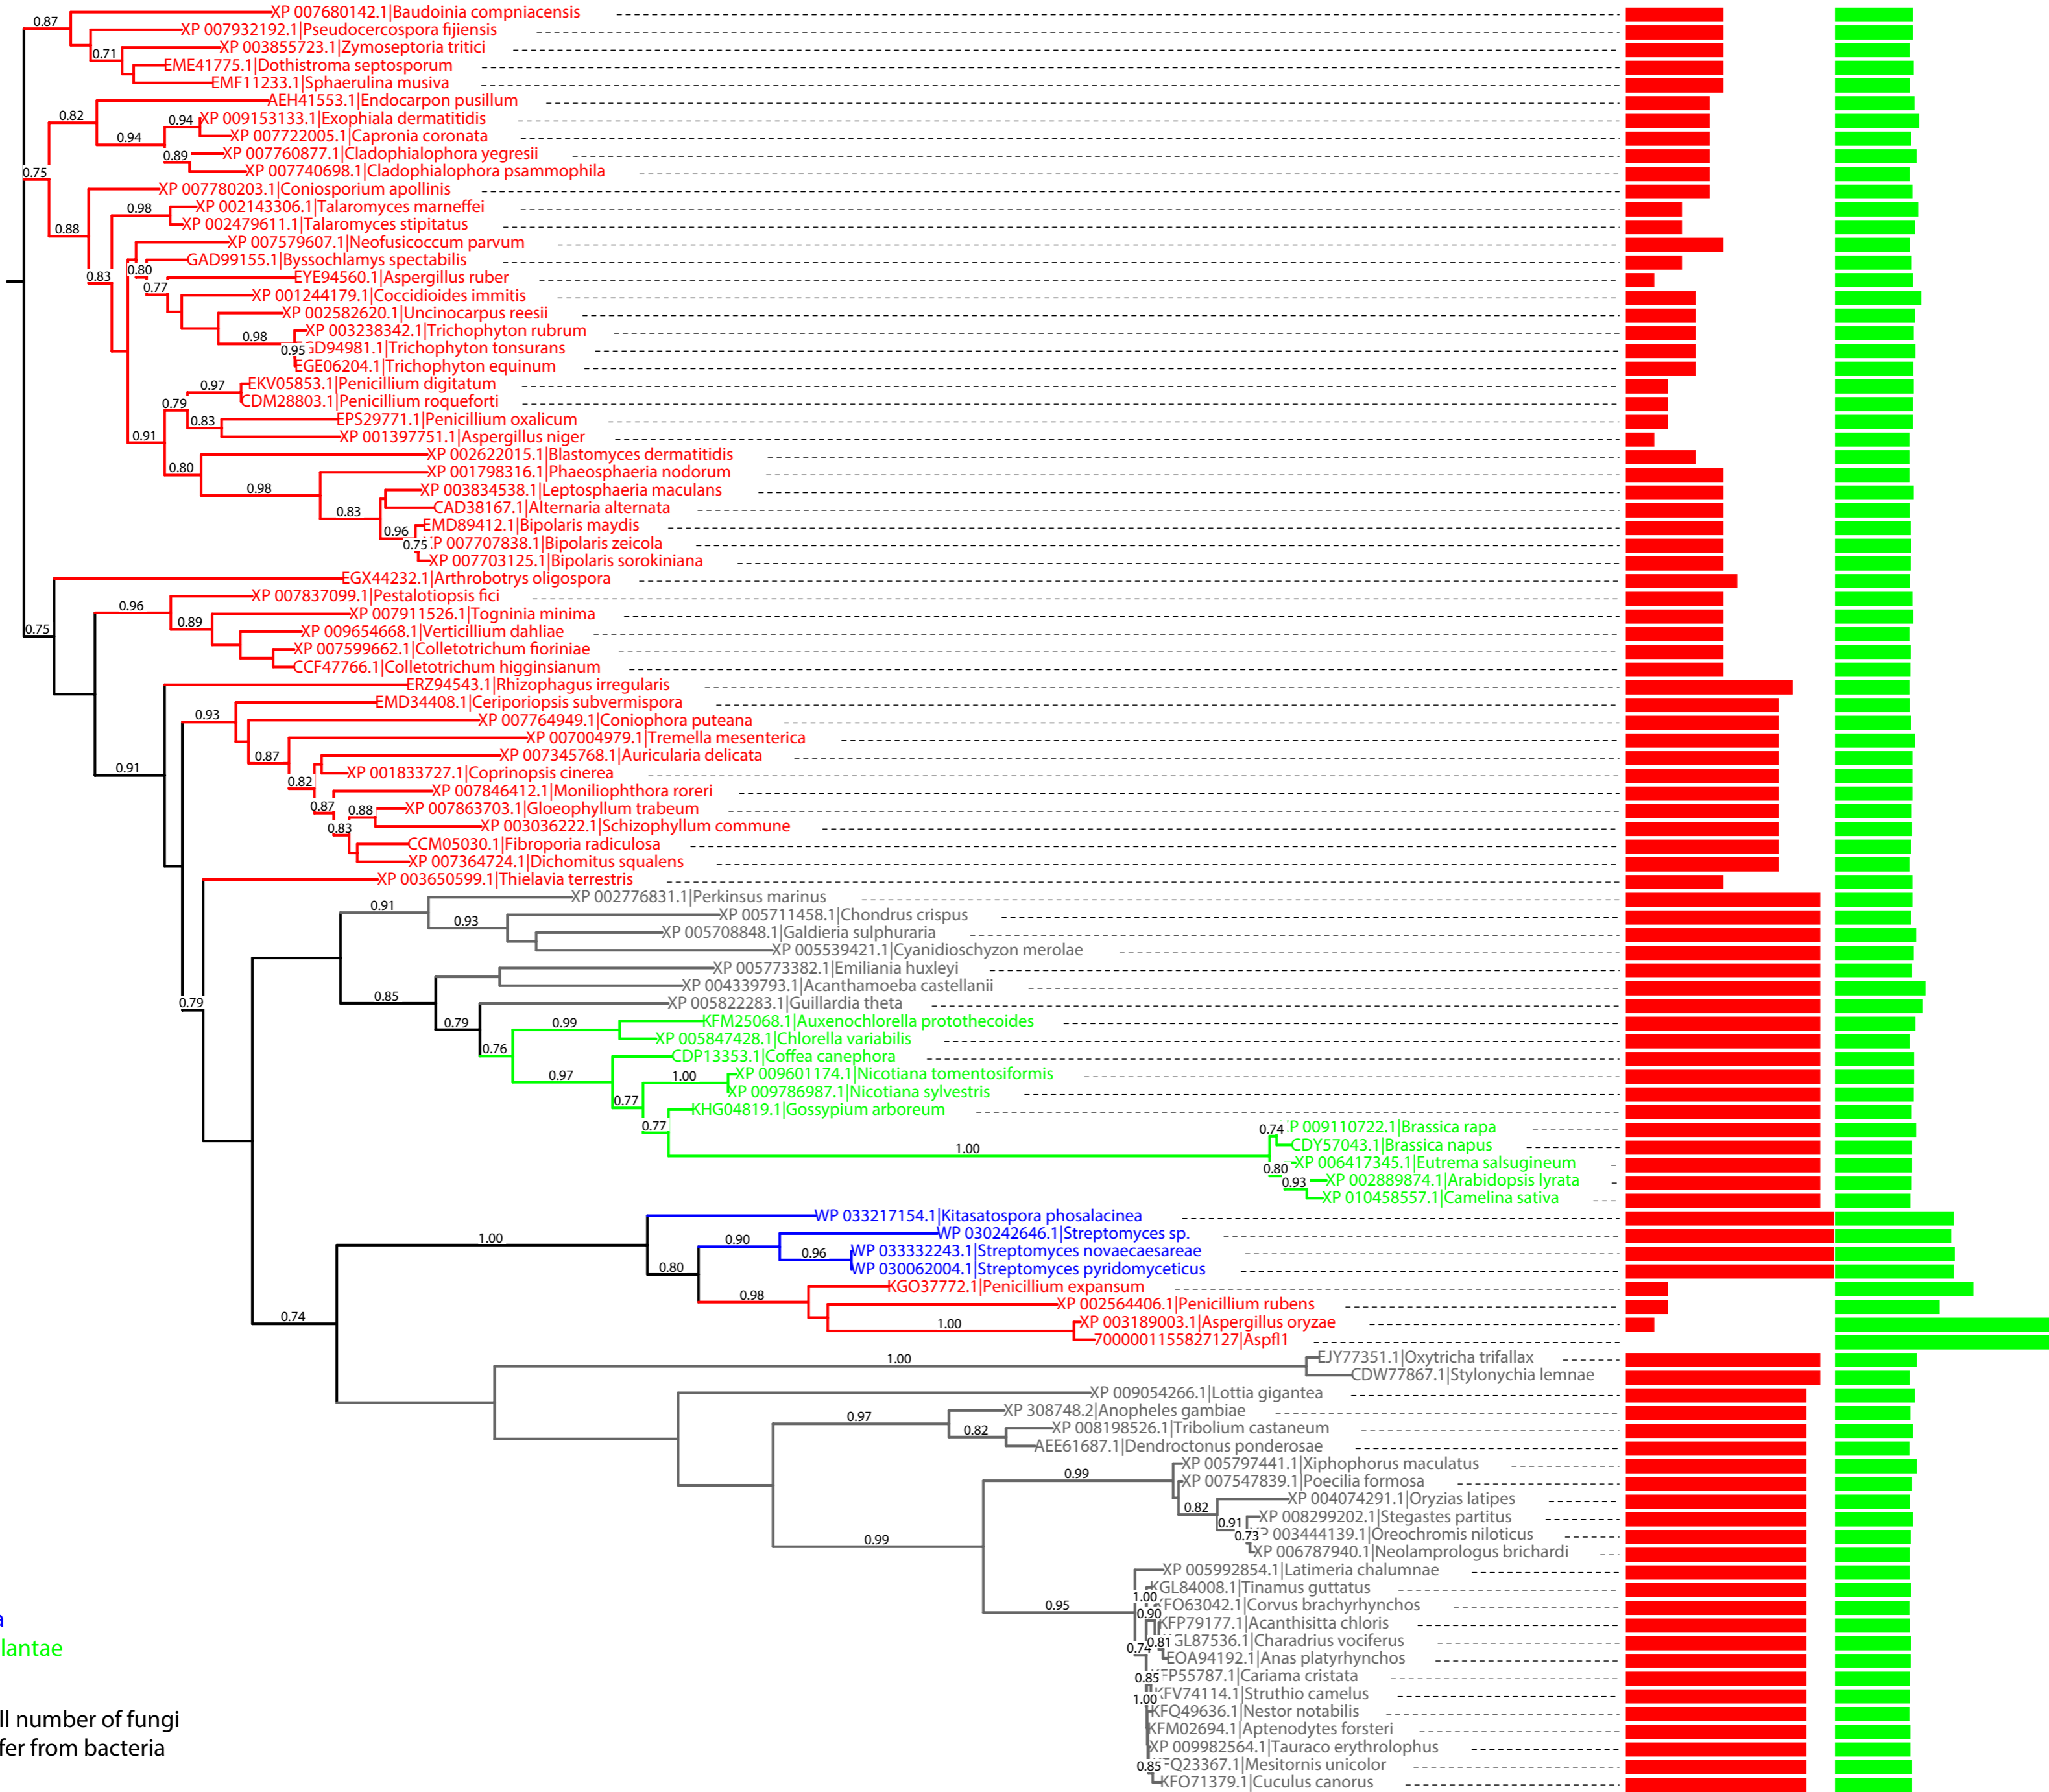

red: fungi  
blue: bacteria  
green: viridiplantae  
grey: others

found in small number of fungi  
ancient transfer from bacteria

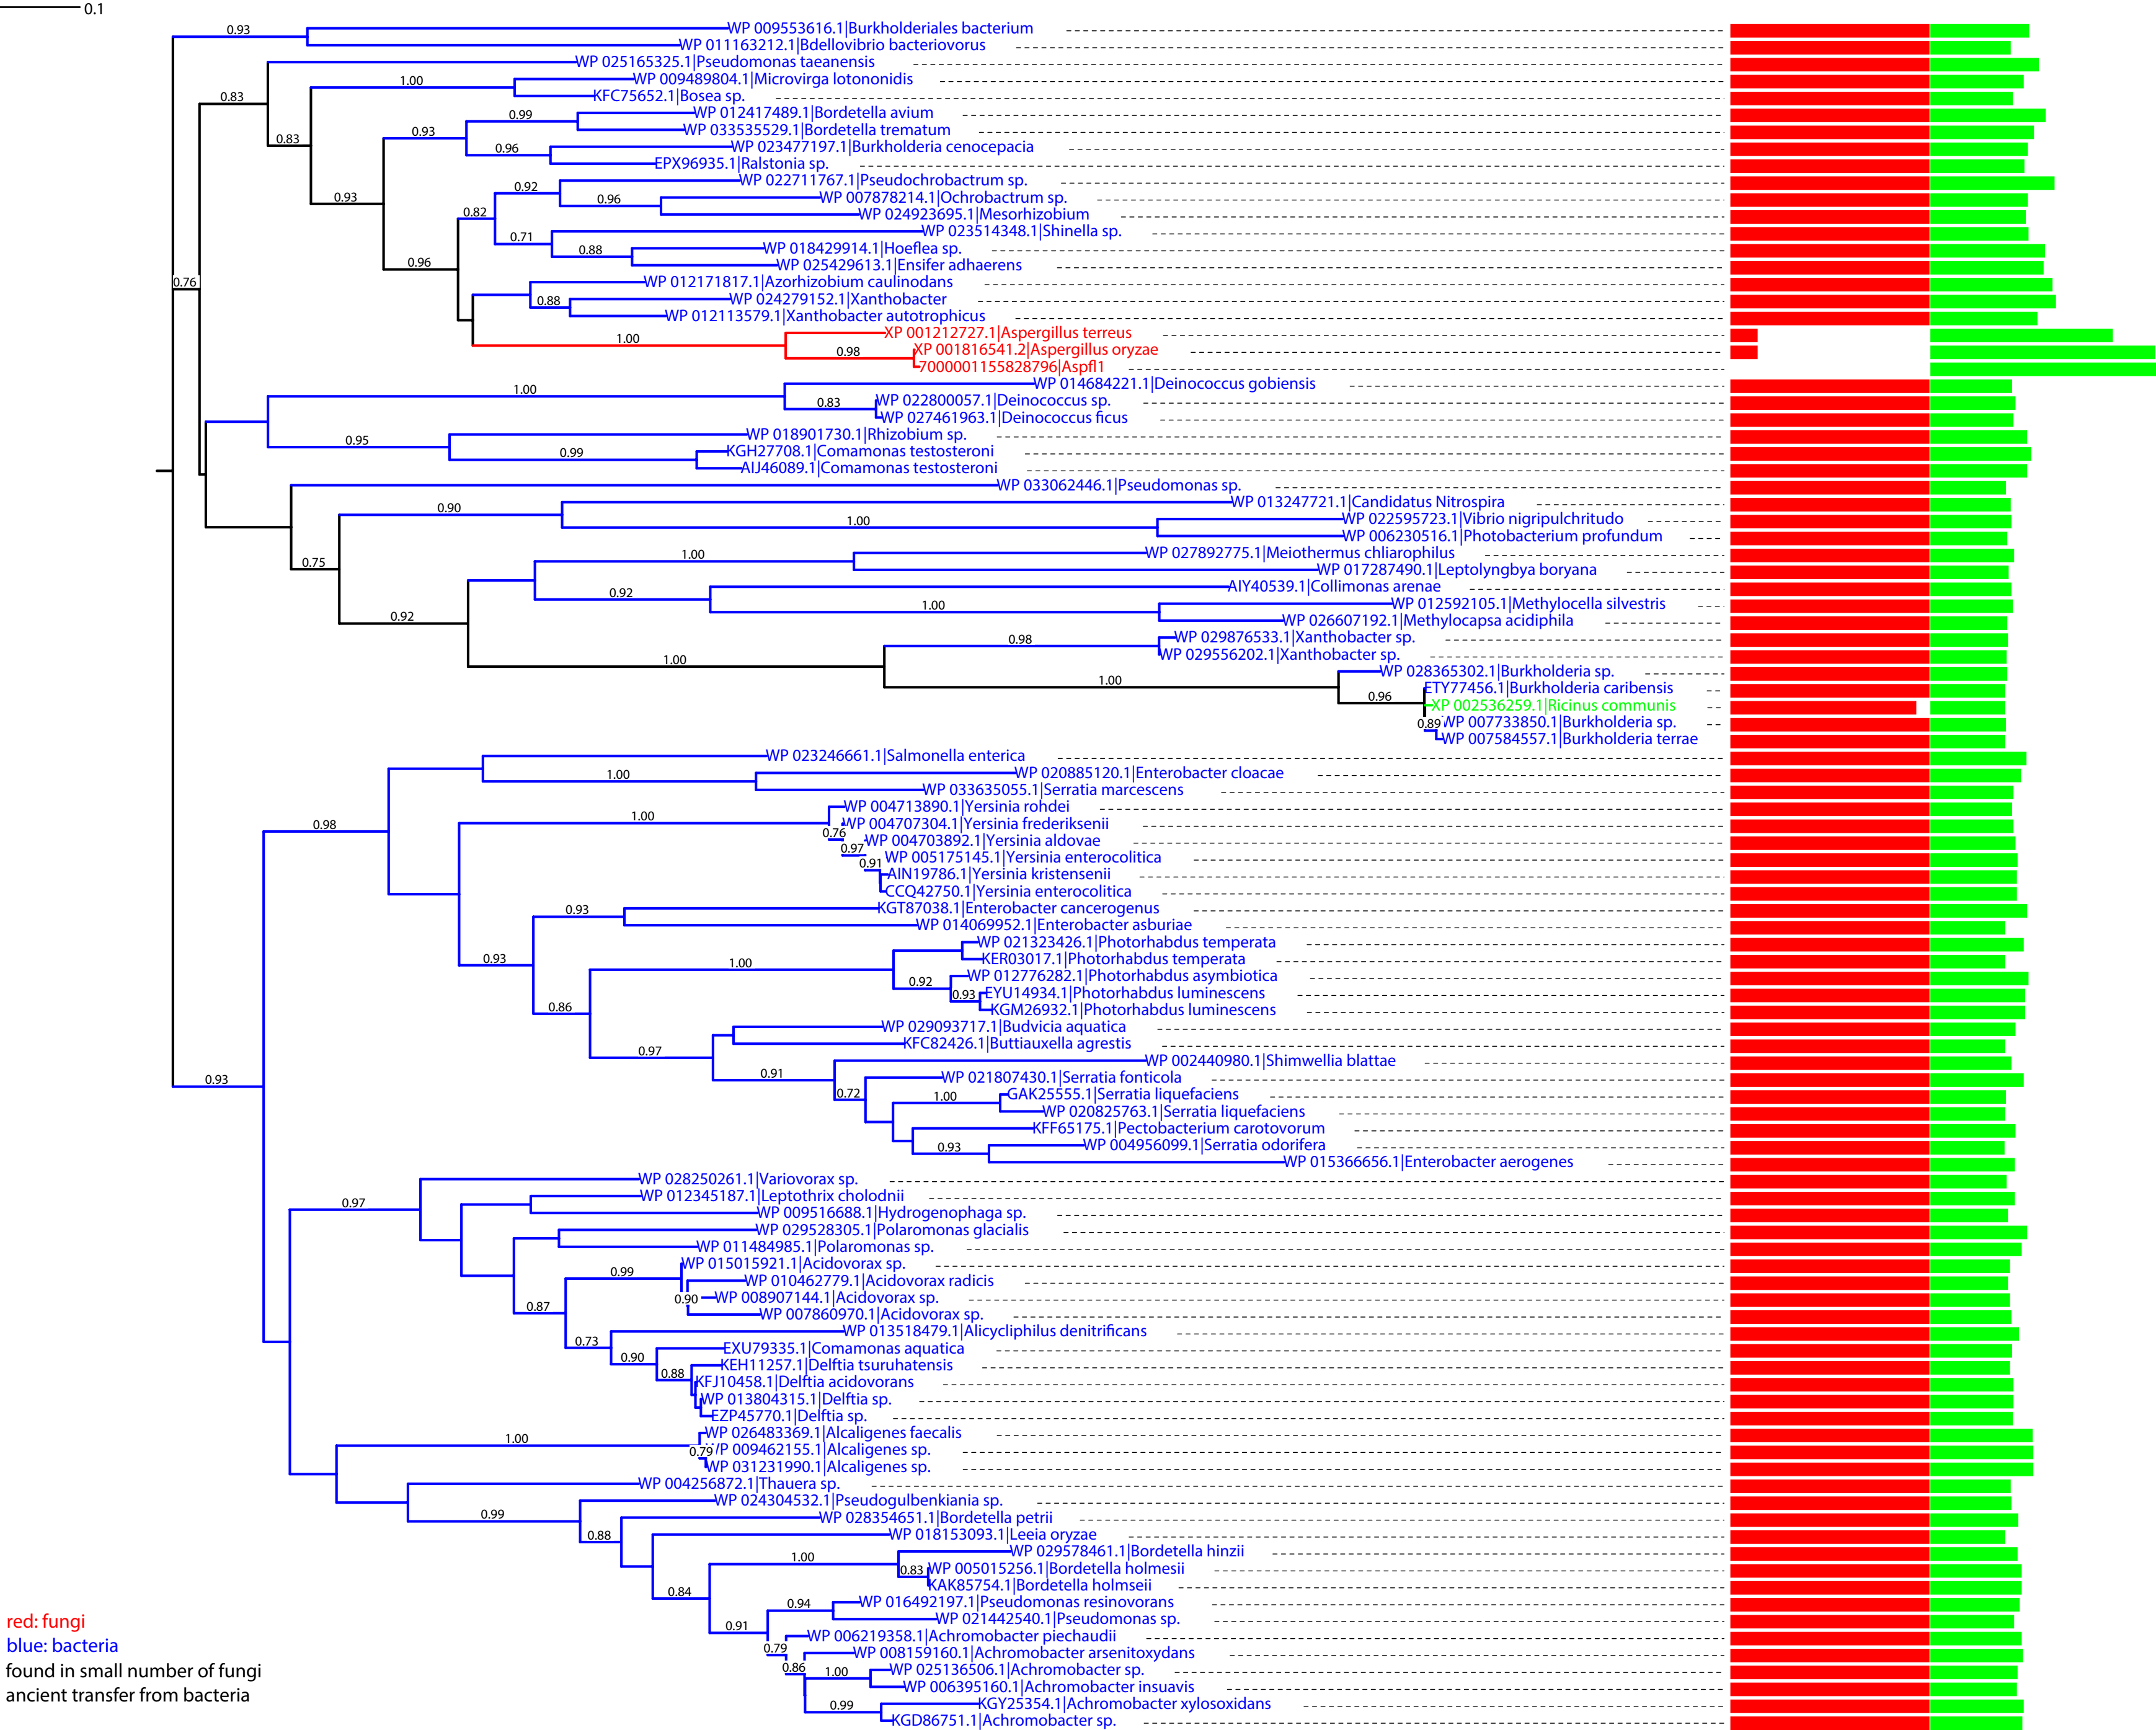

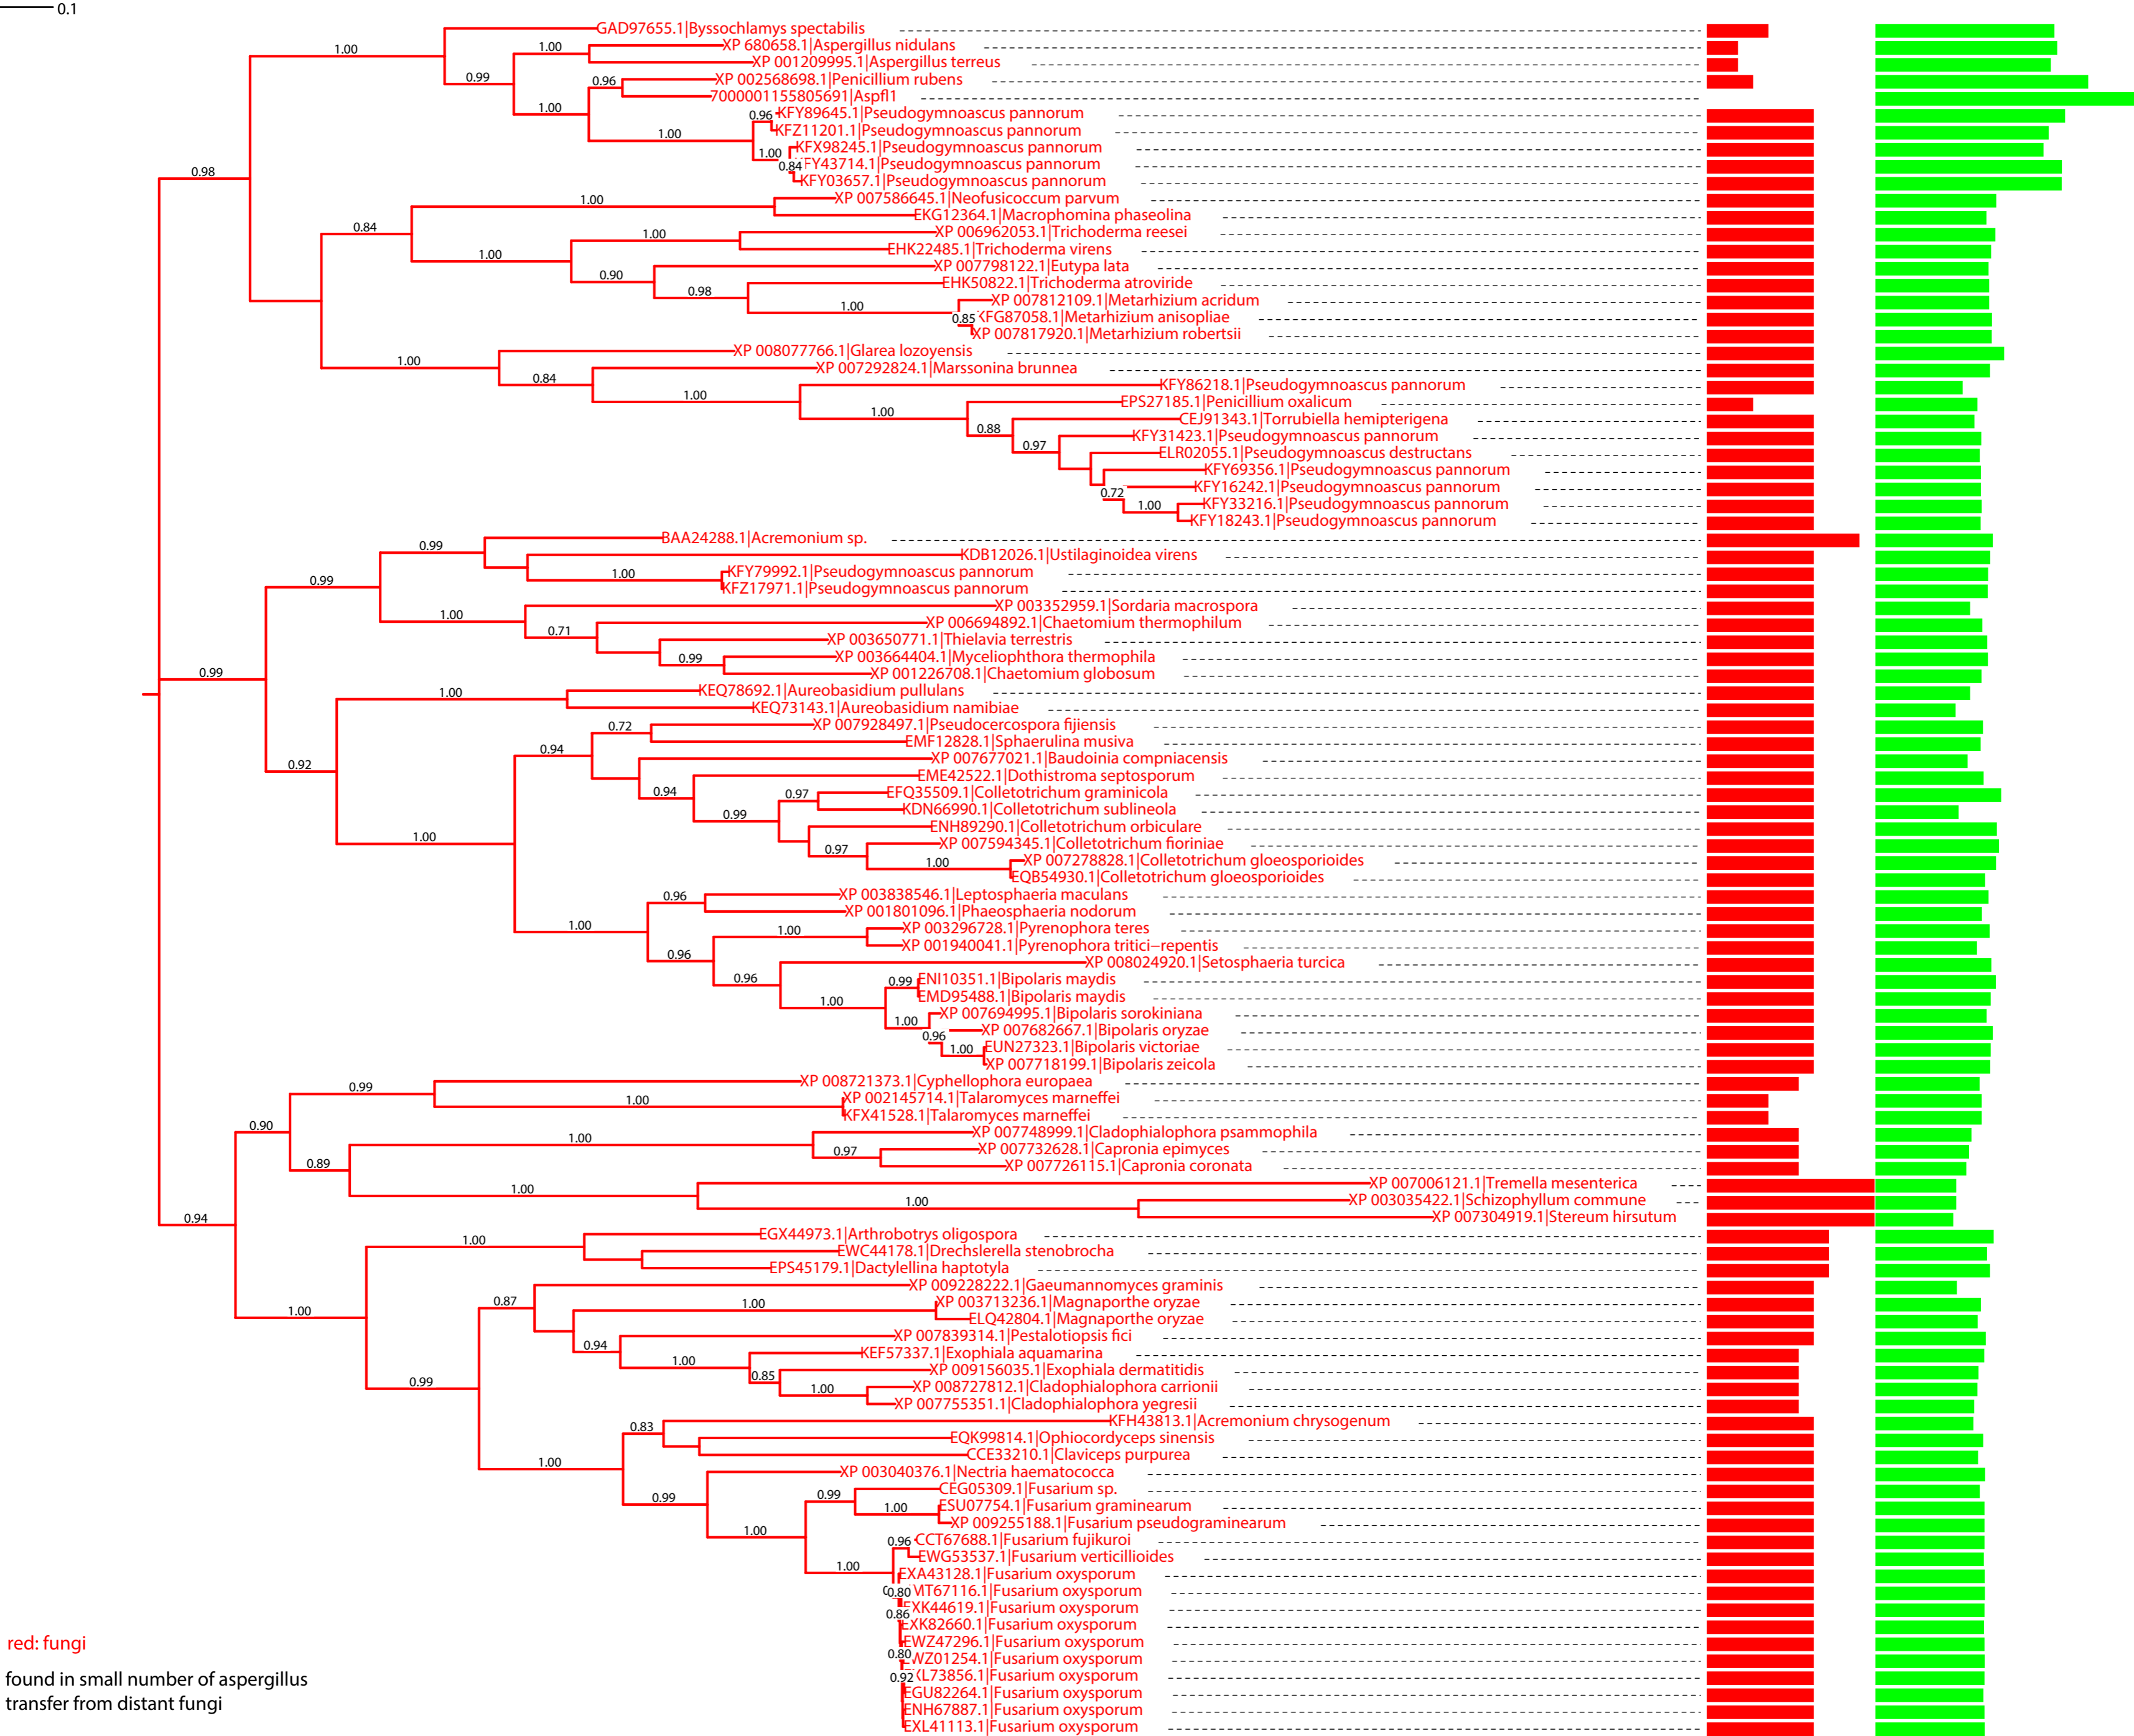

red: fungi

transfer from distant fungi

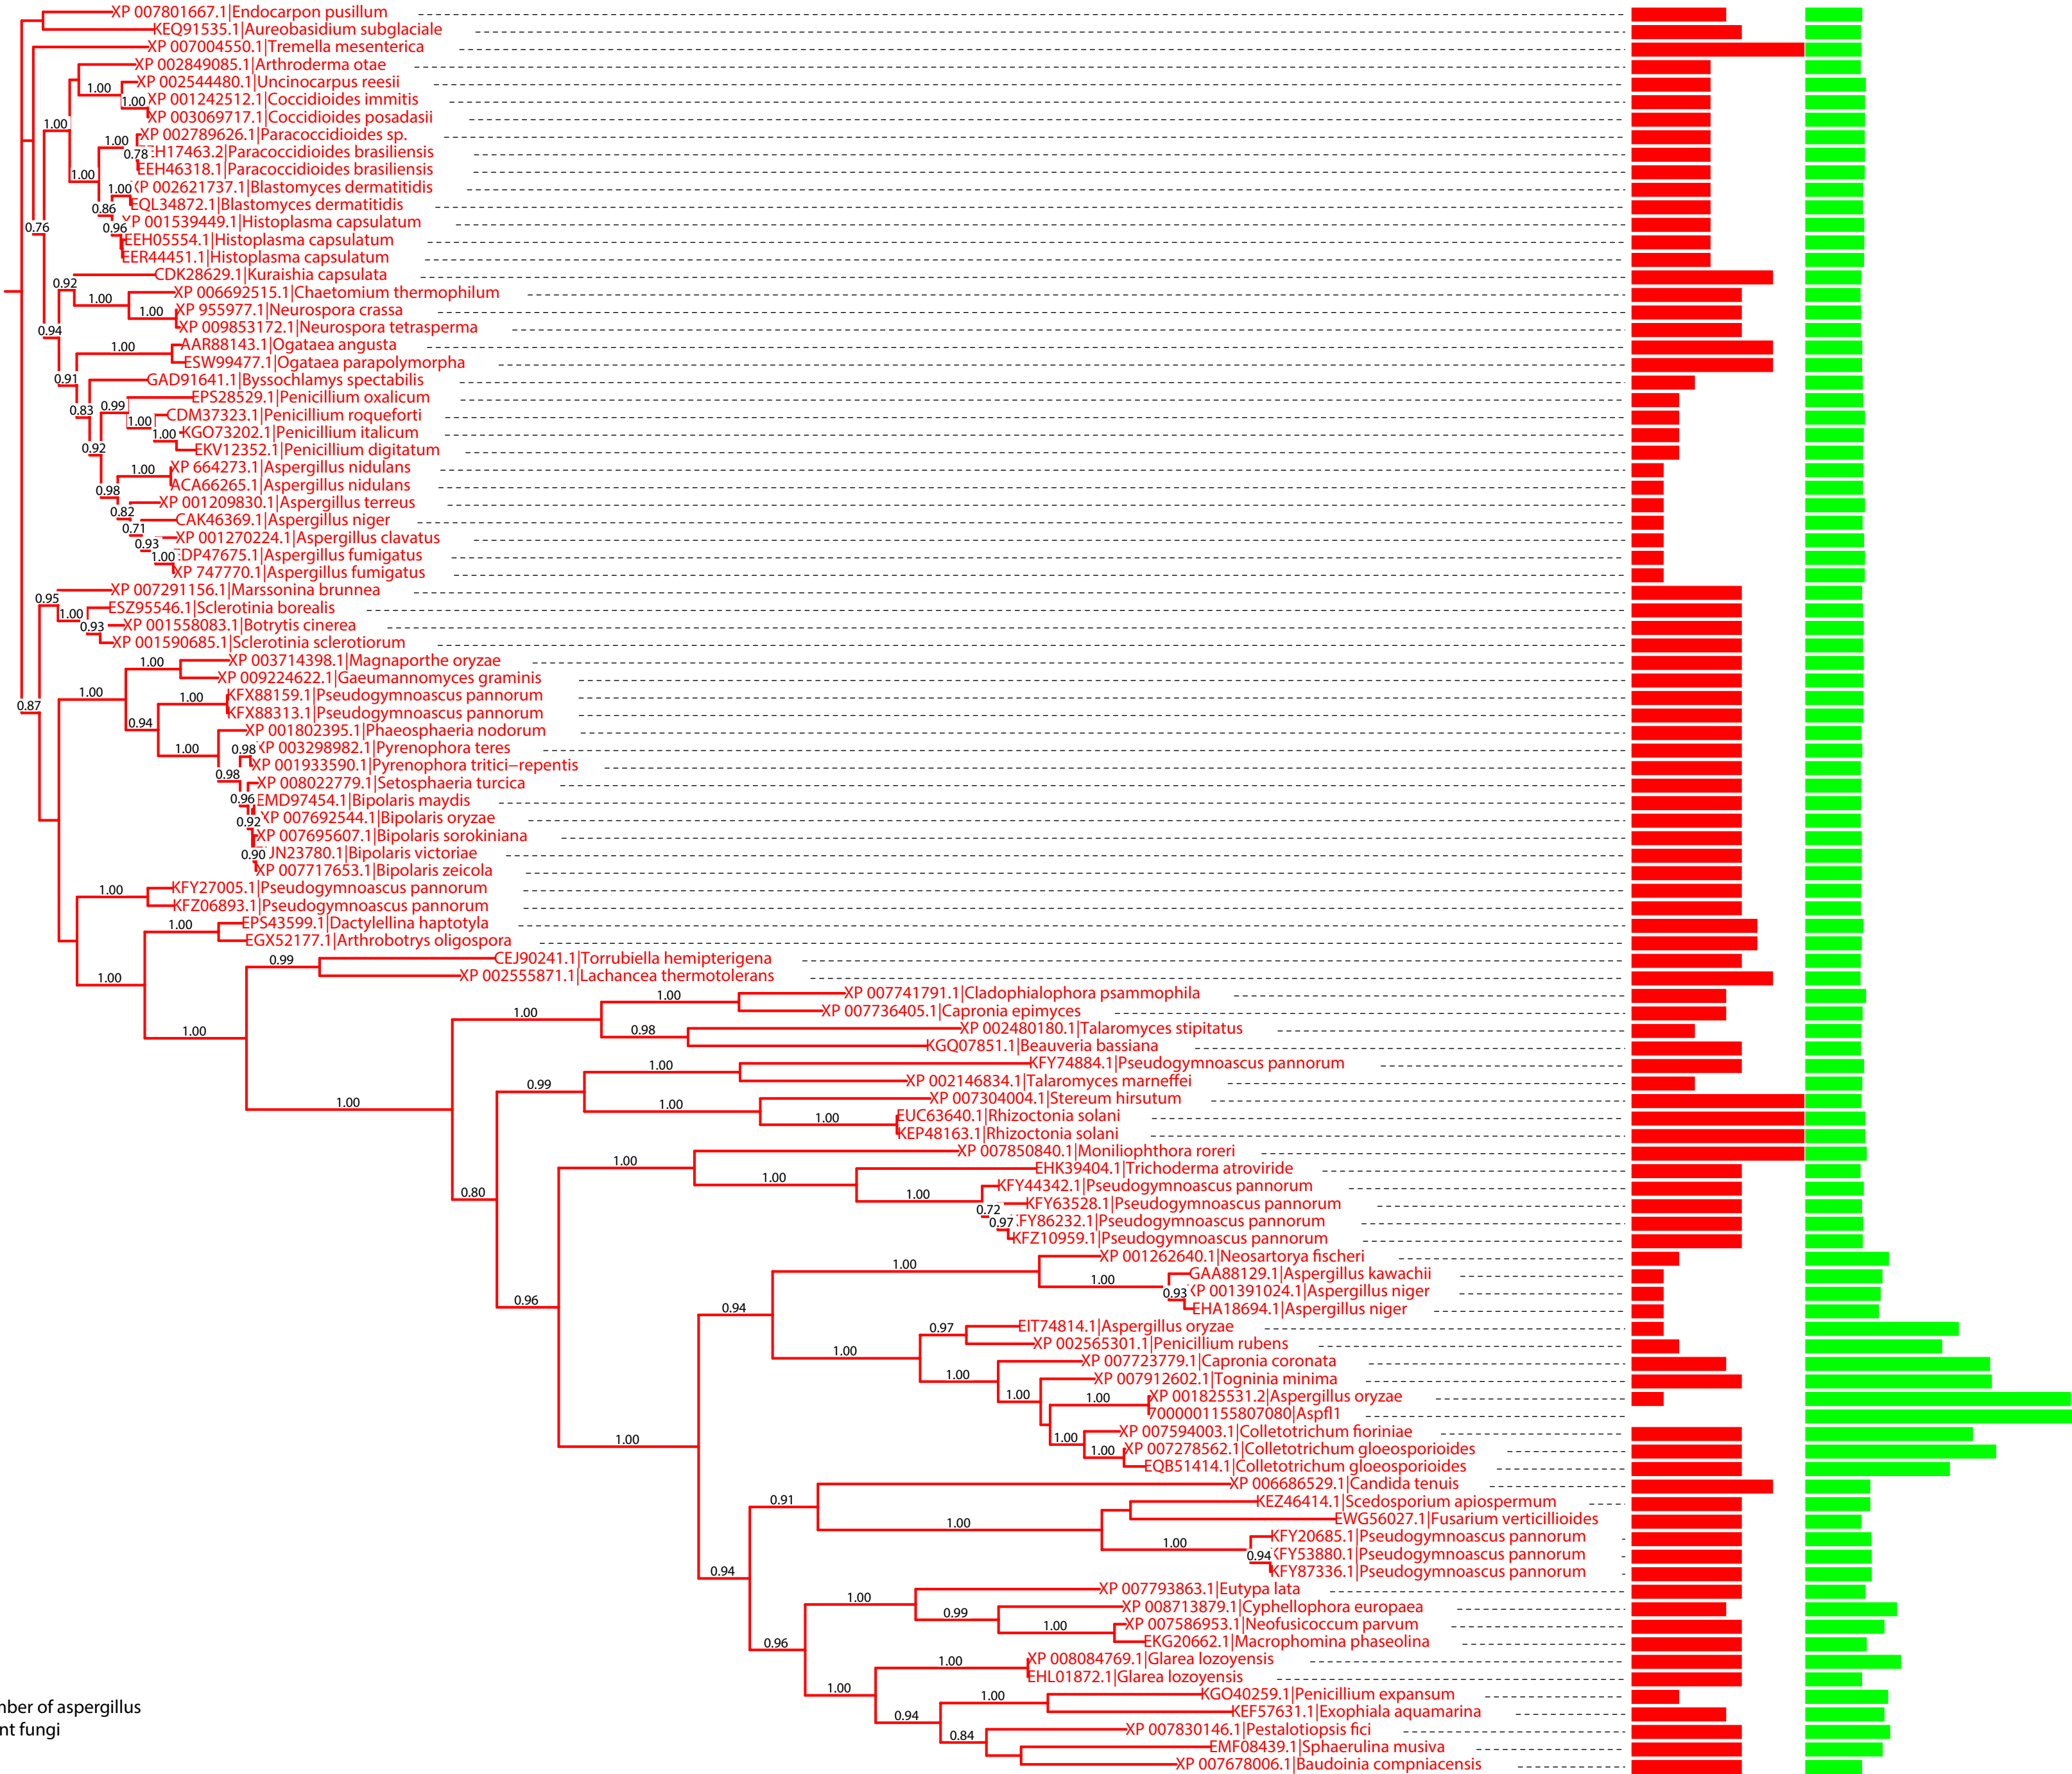

0.1

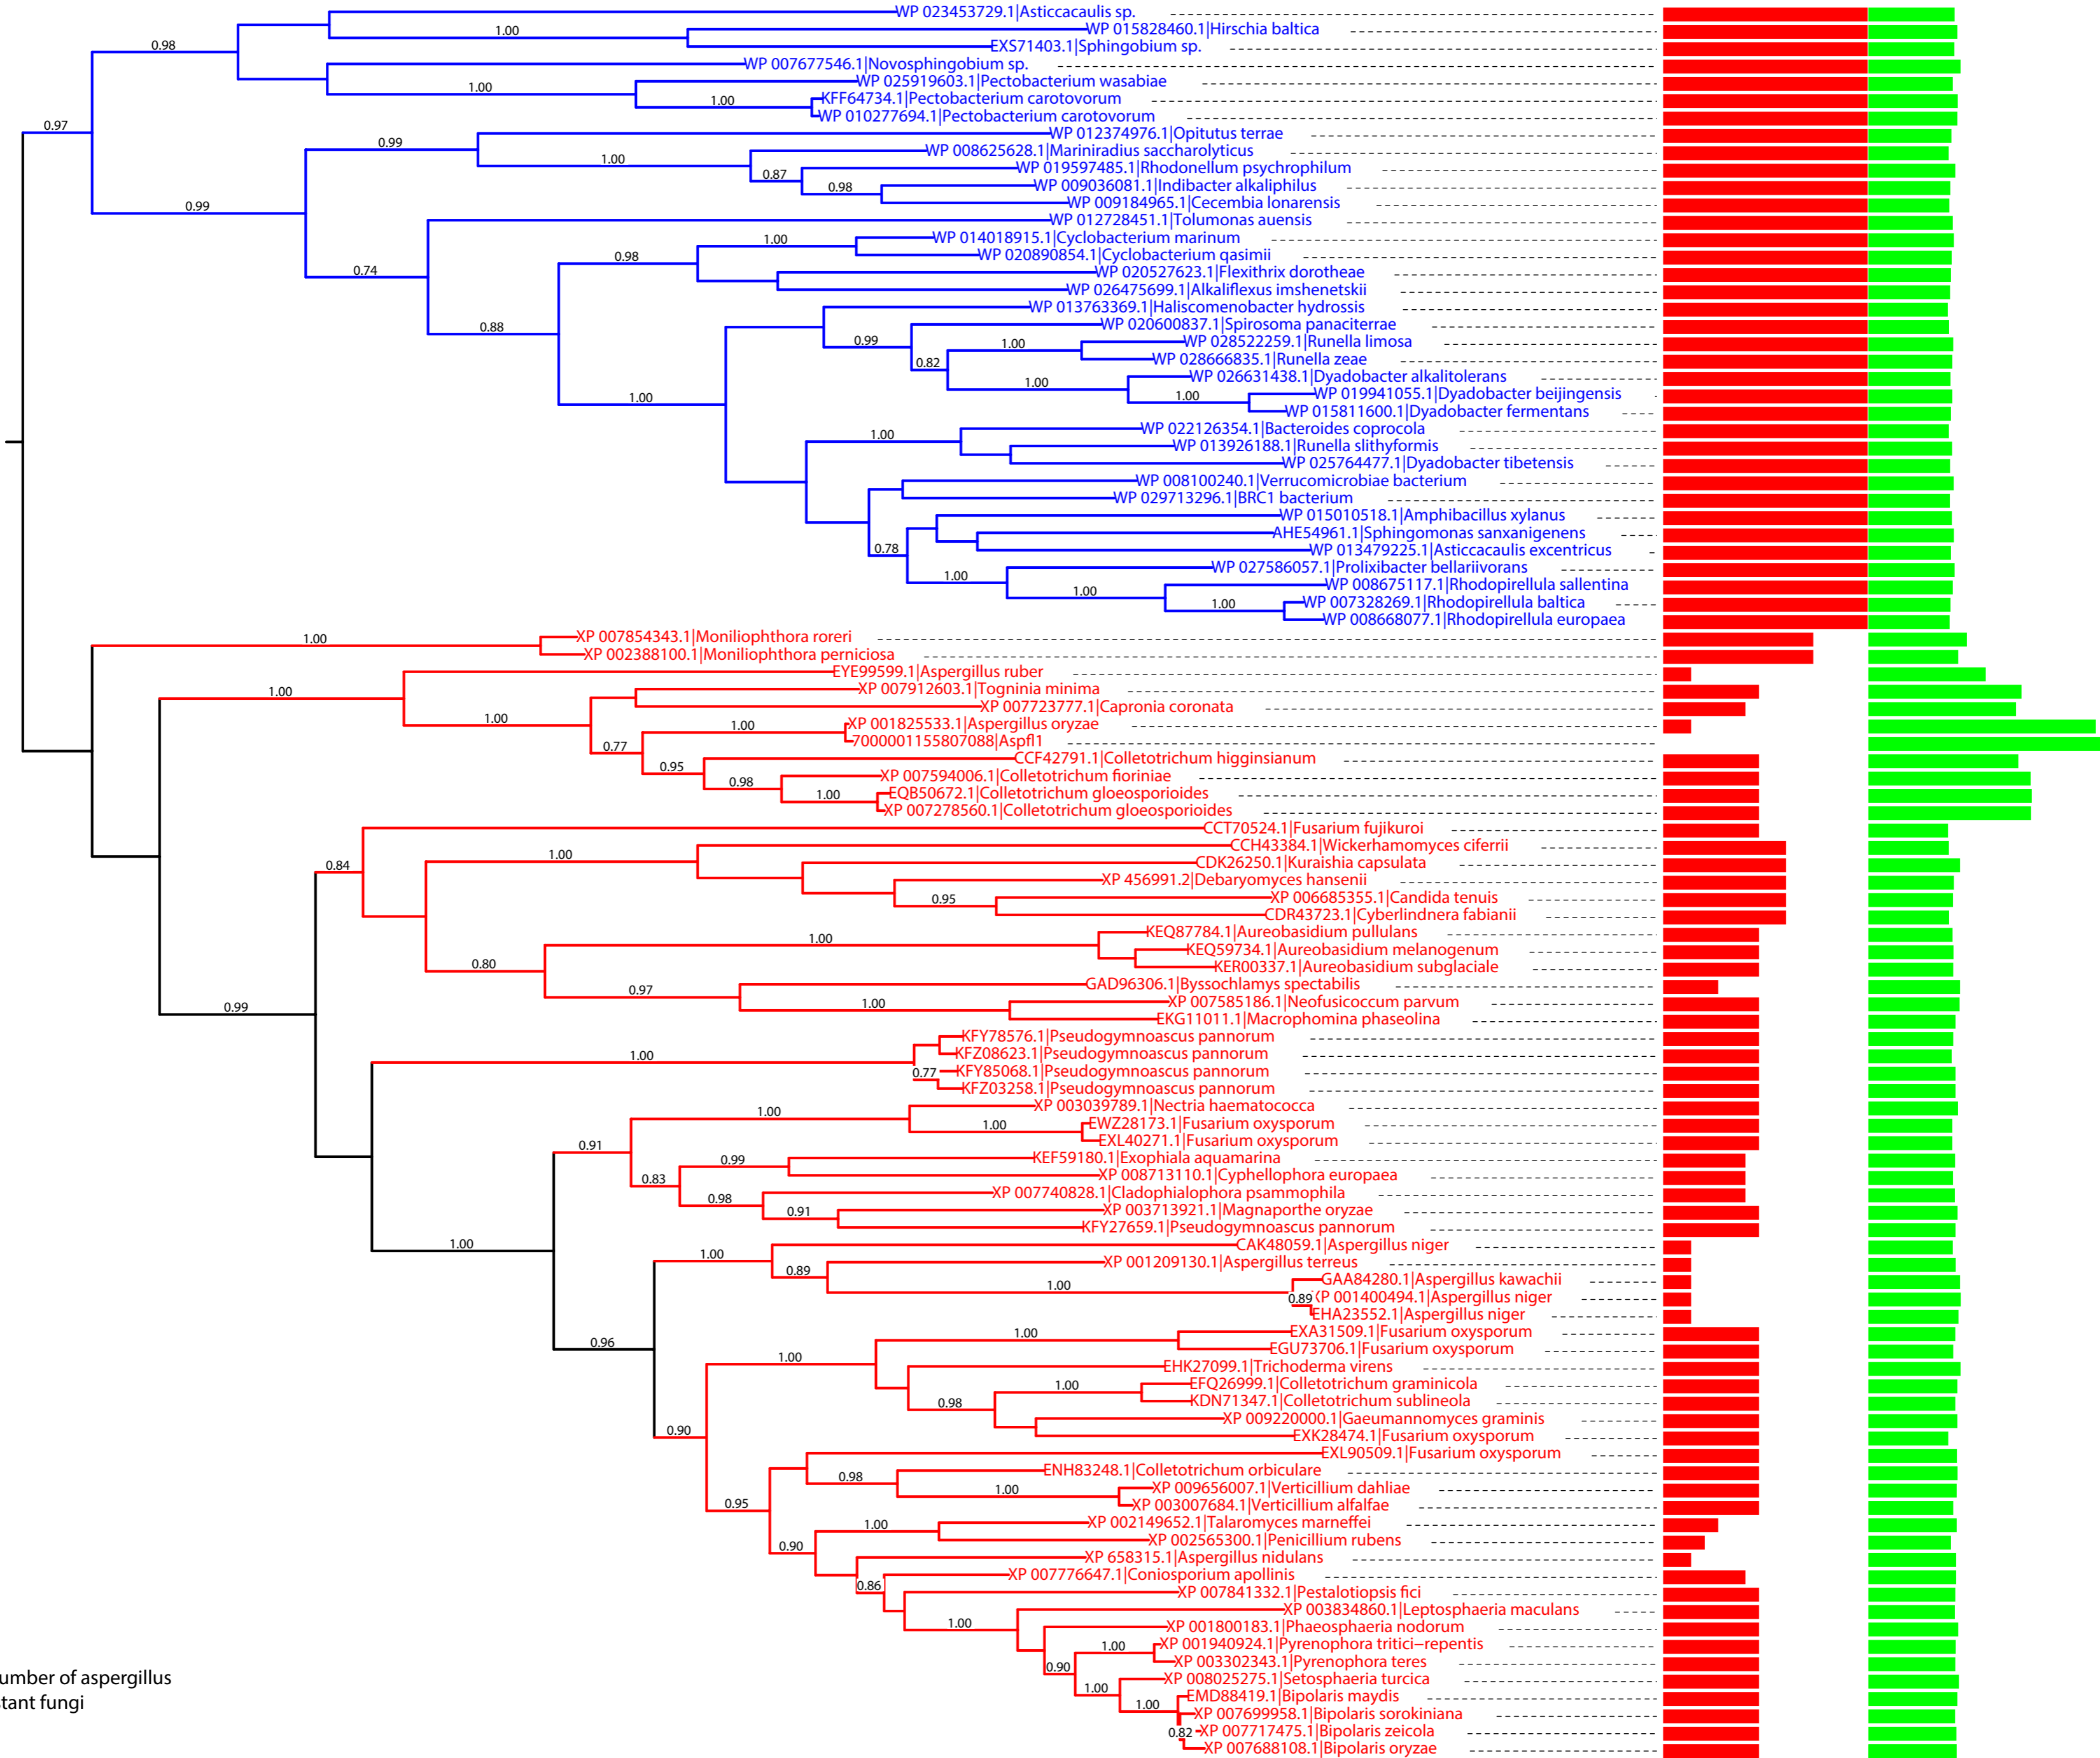

red: fungi  
blue: bacteria

found in small number of aspergillus  
transfer from distant fungi

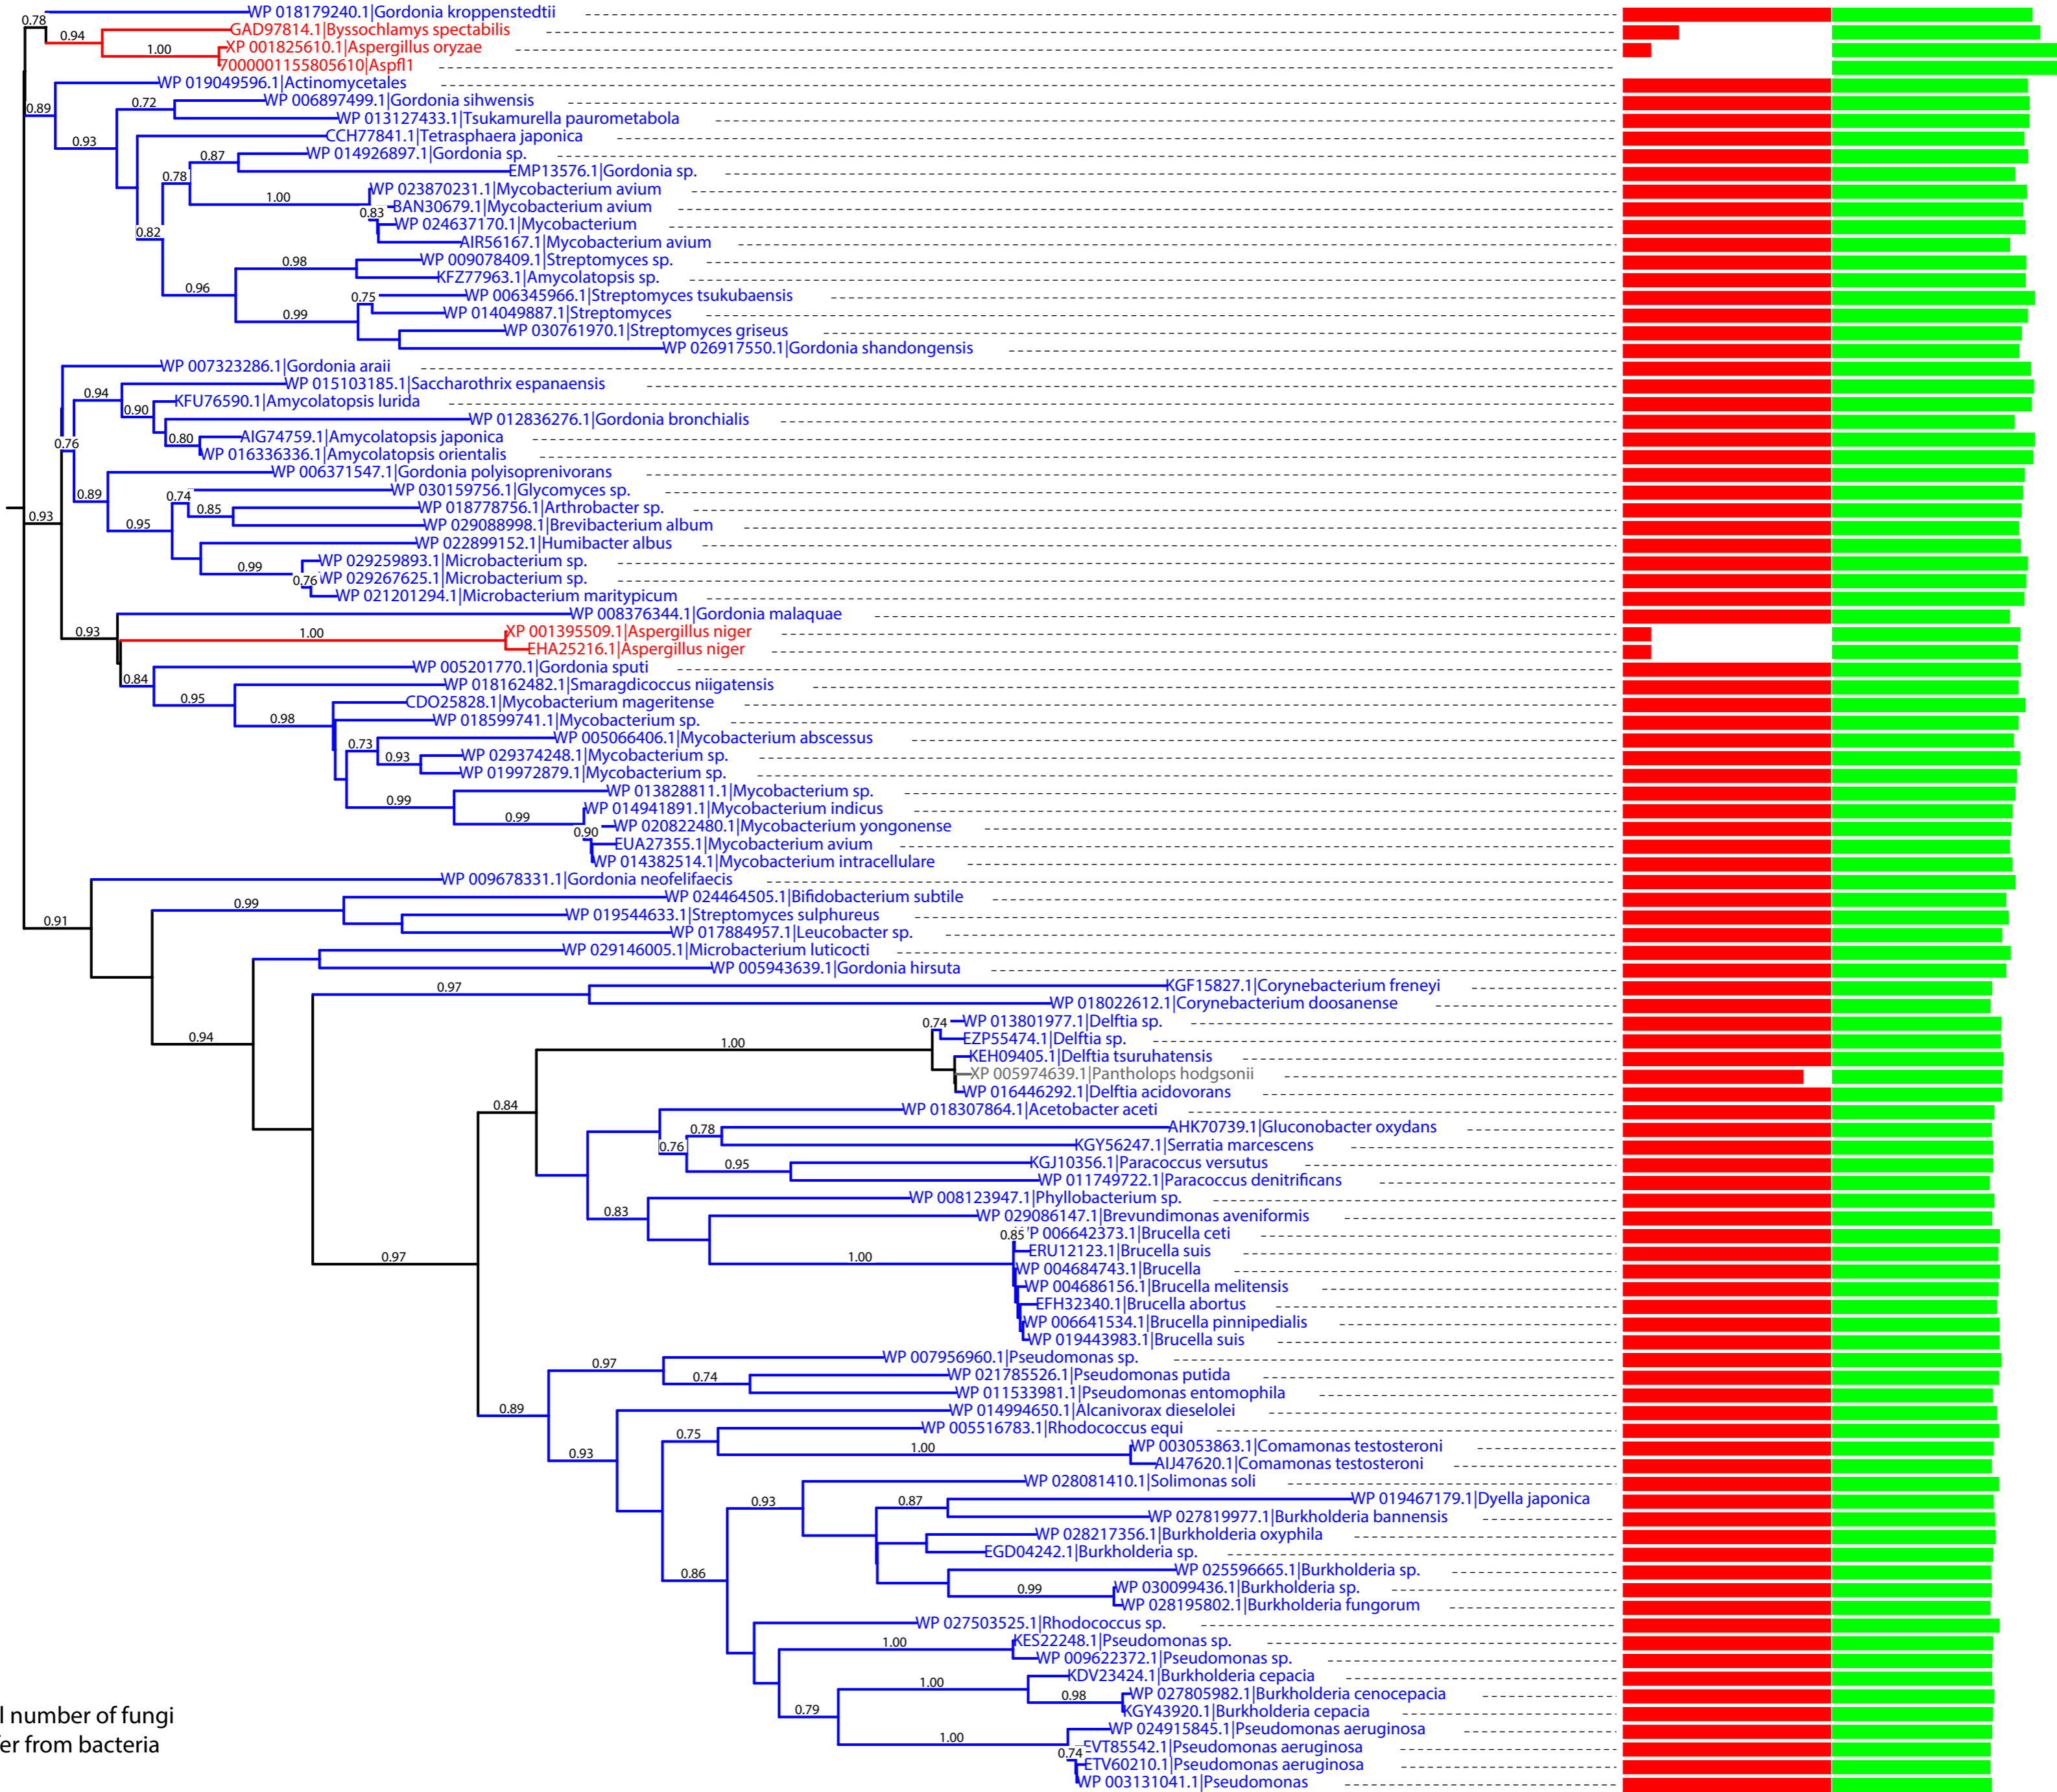

red: fungi  
blue: bacteria  
found in small number of fungi  
ancient transfer from bacteria

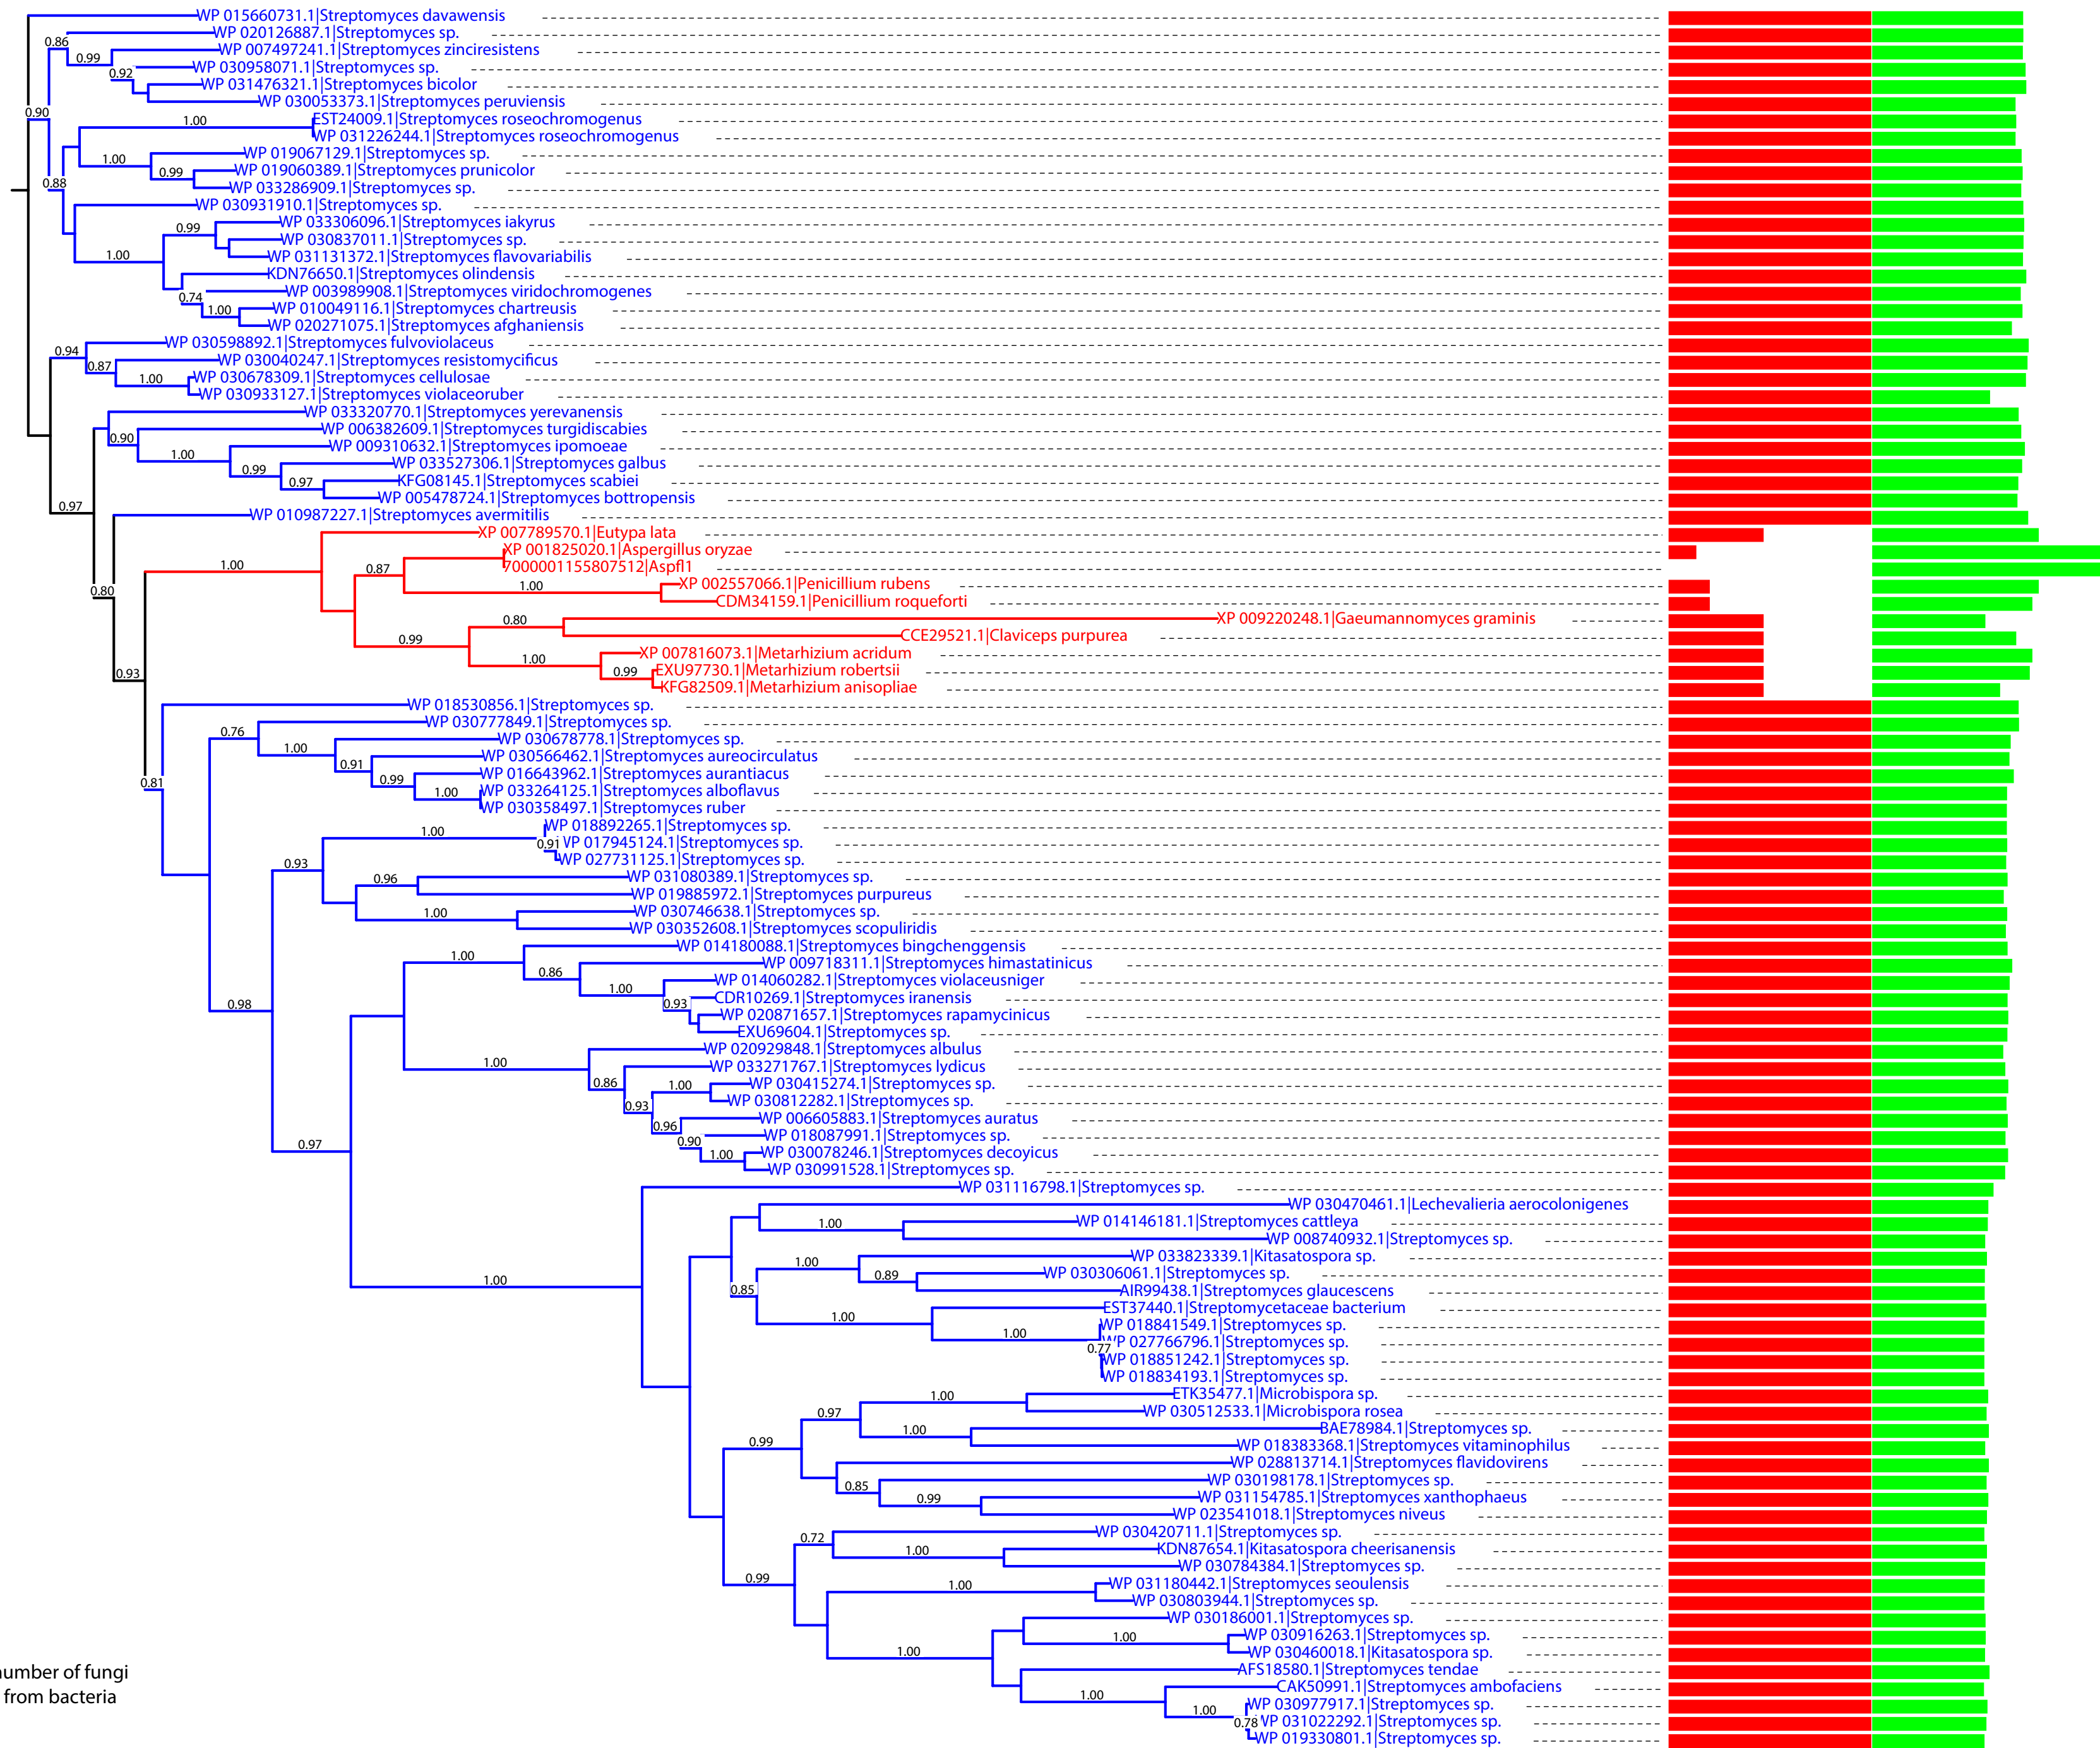

red: fungi

blue: bacteria

found in small number of fungi

ancient transfer from bacteria

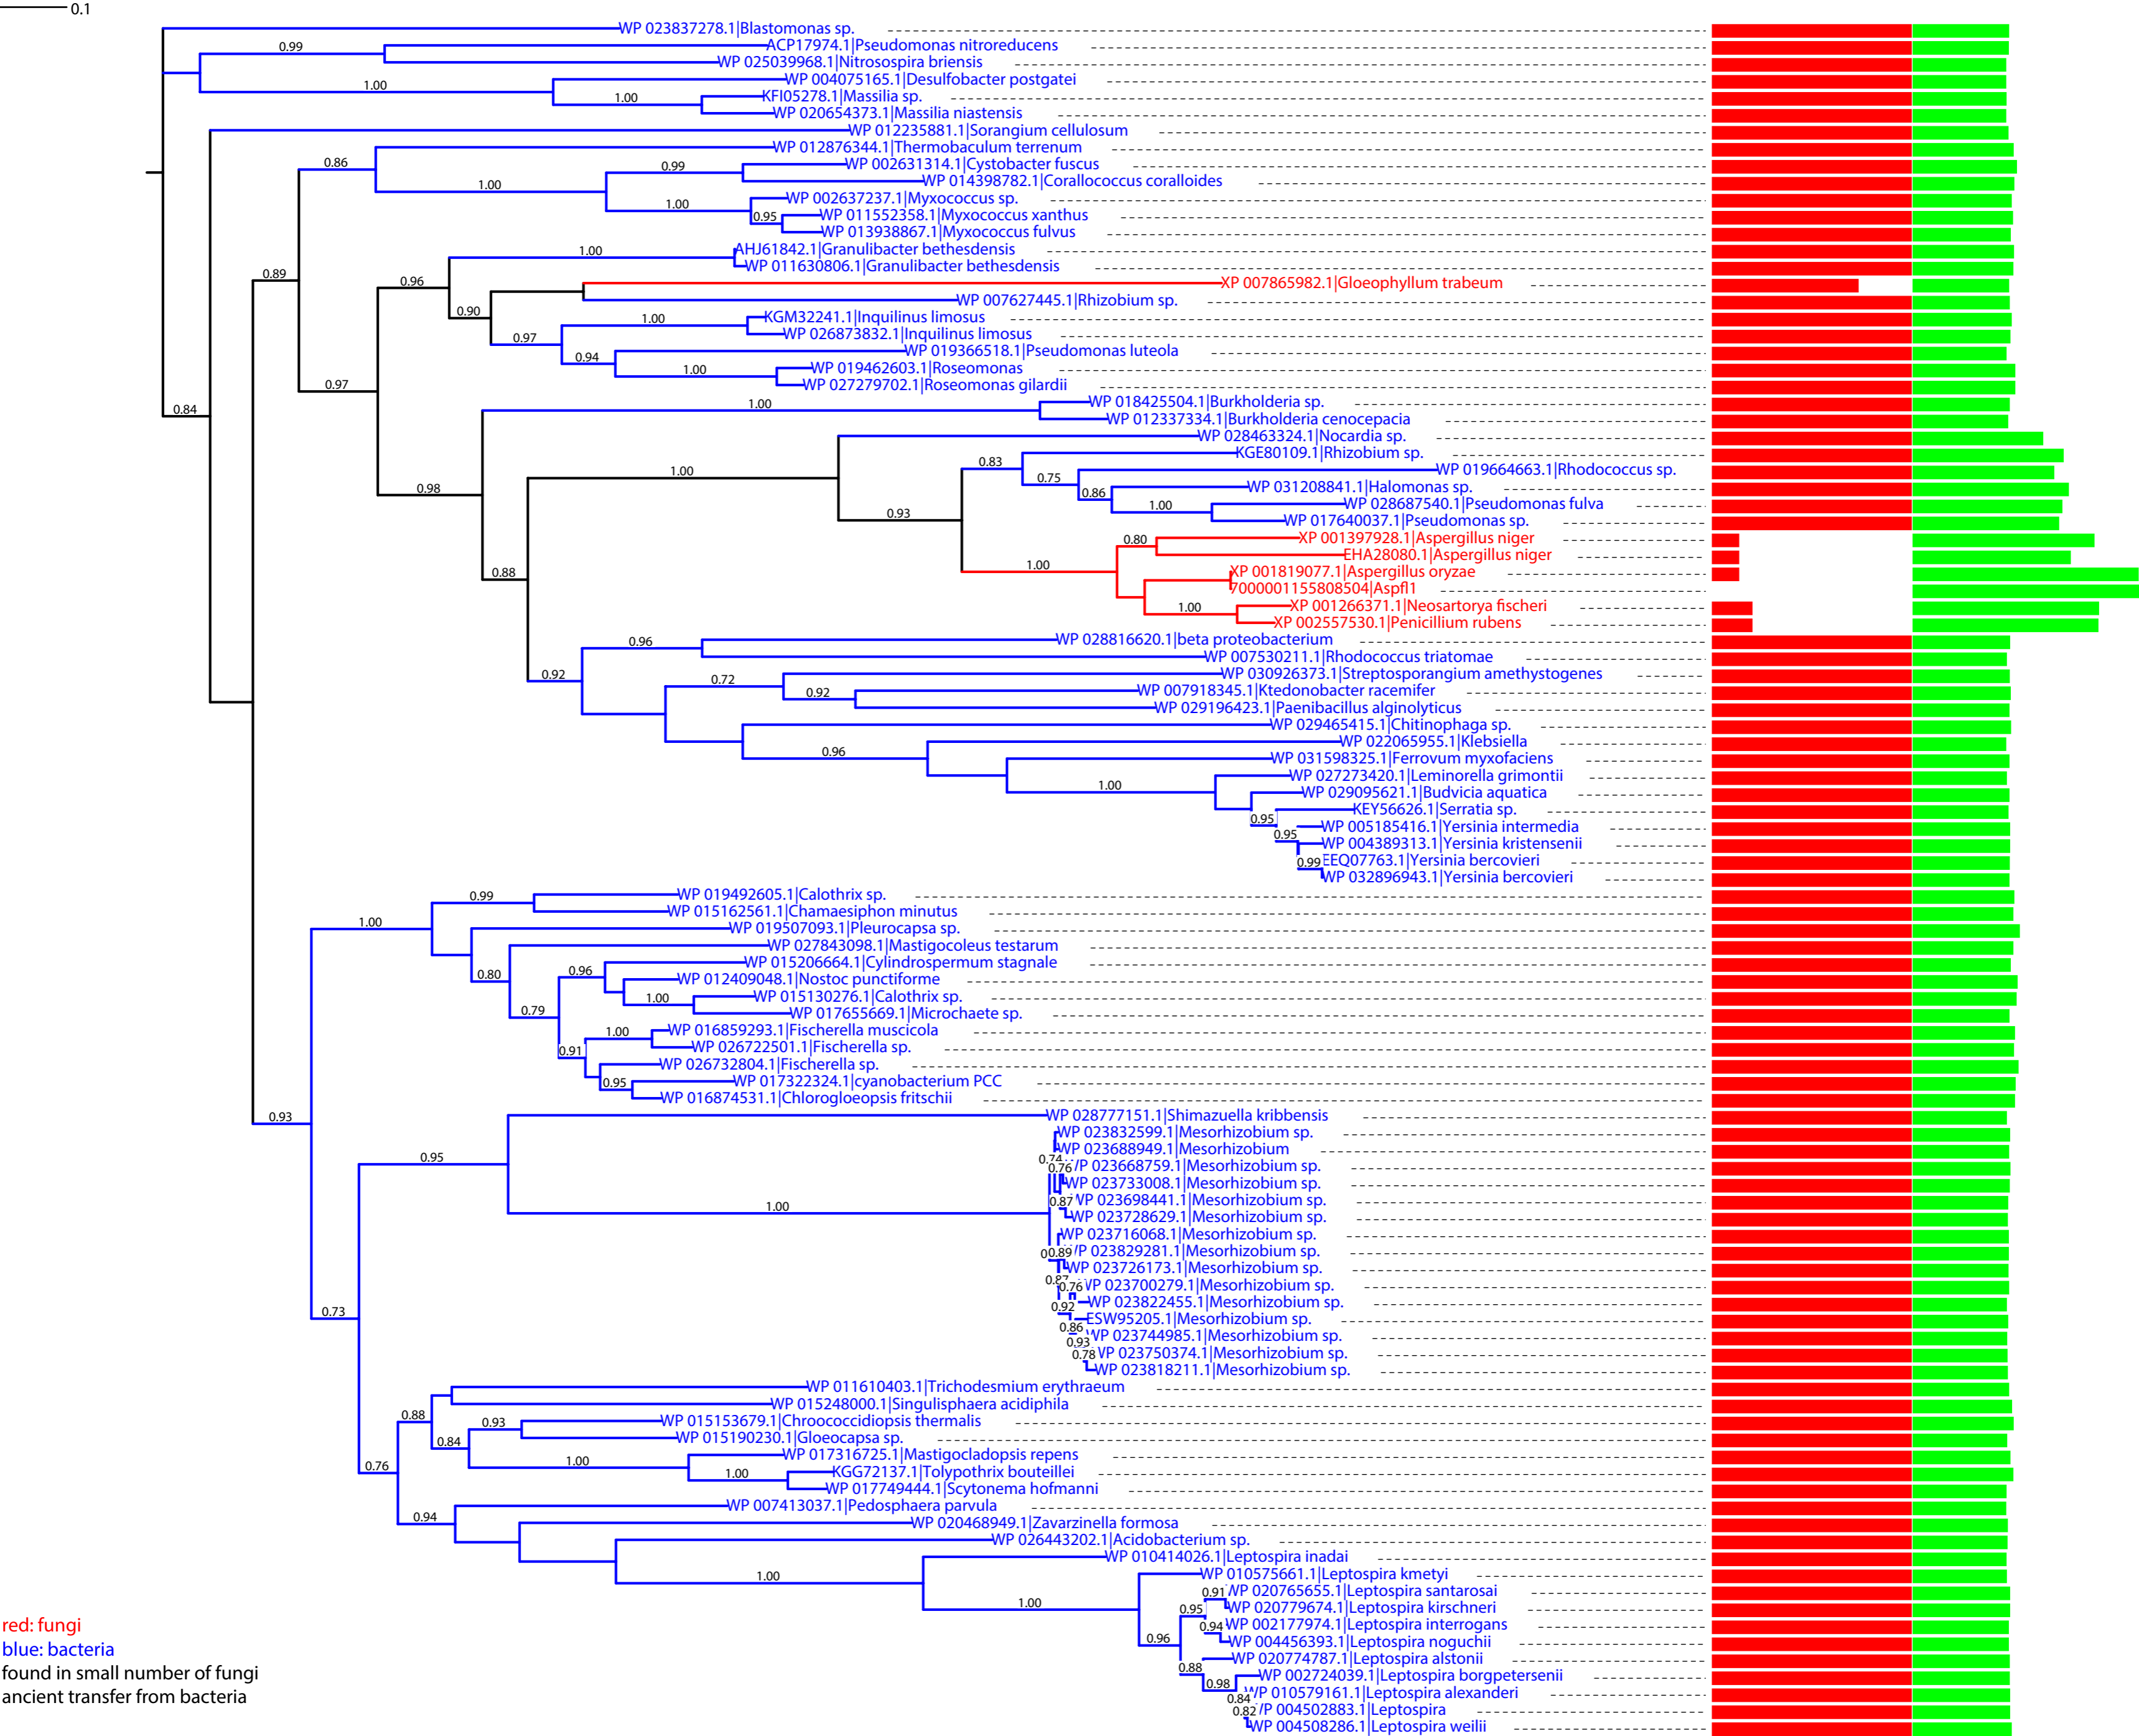

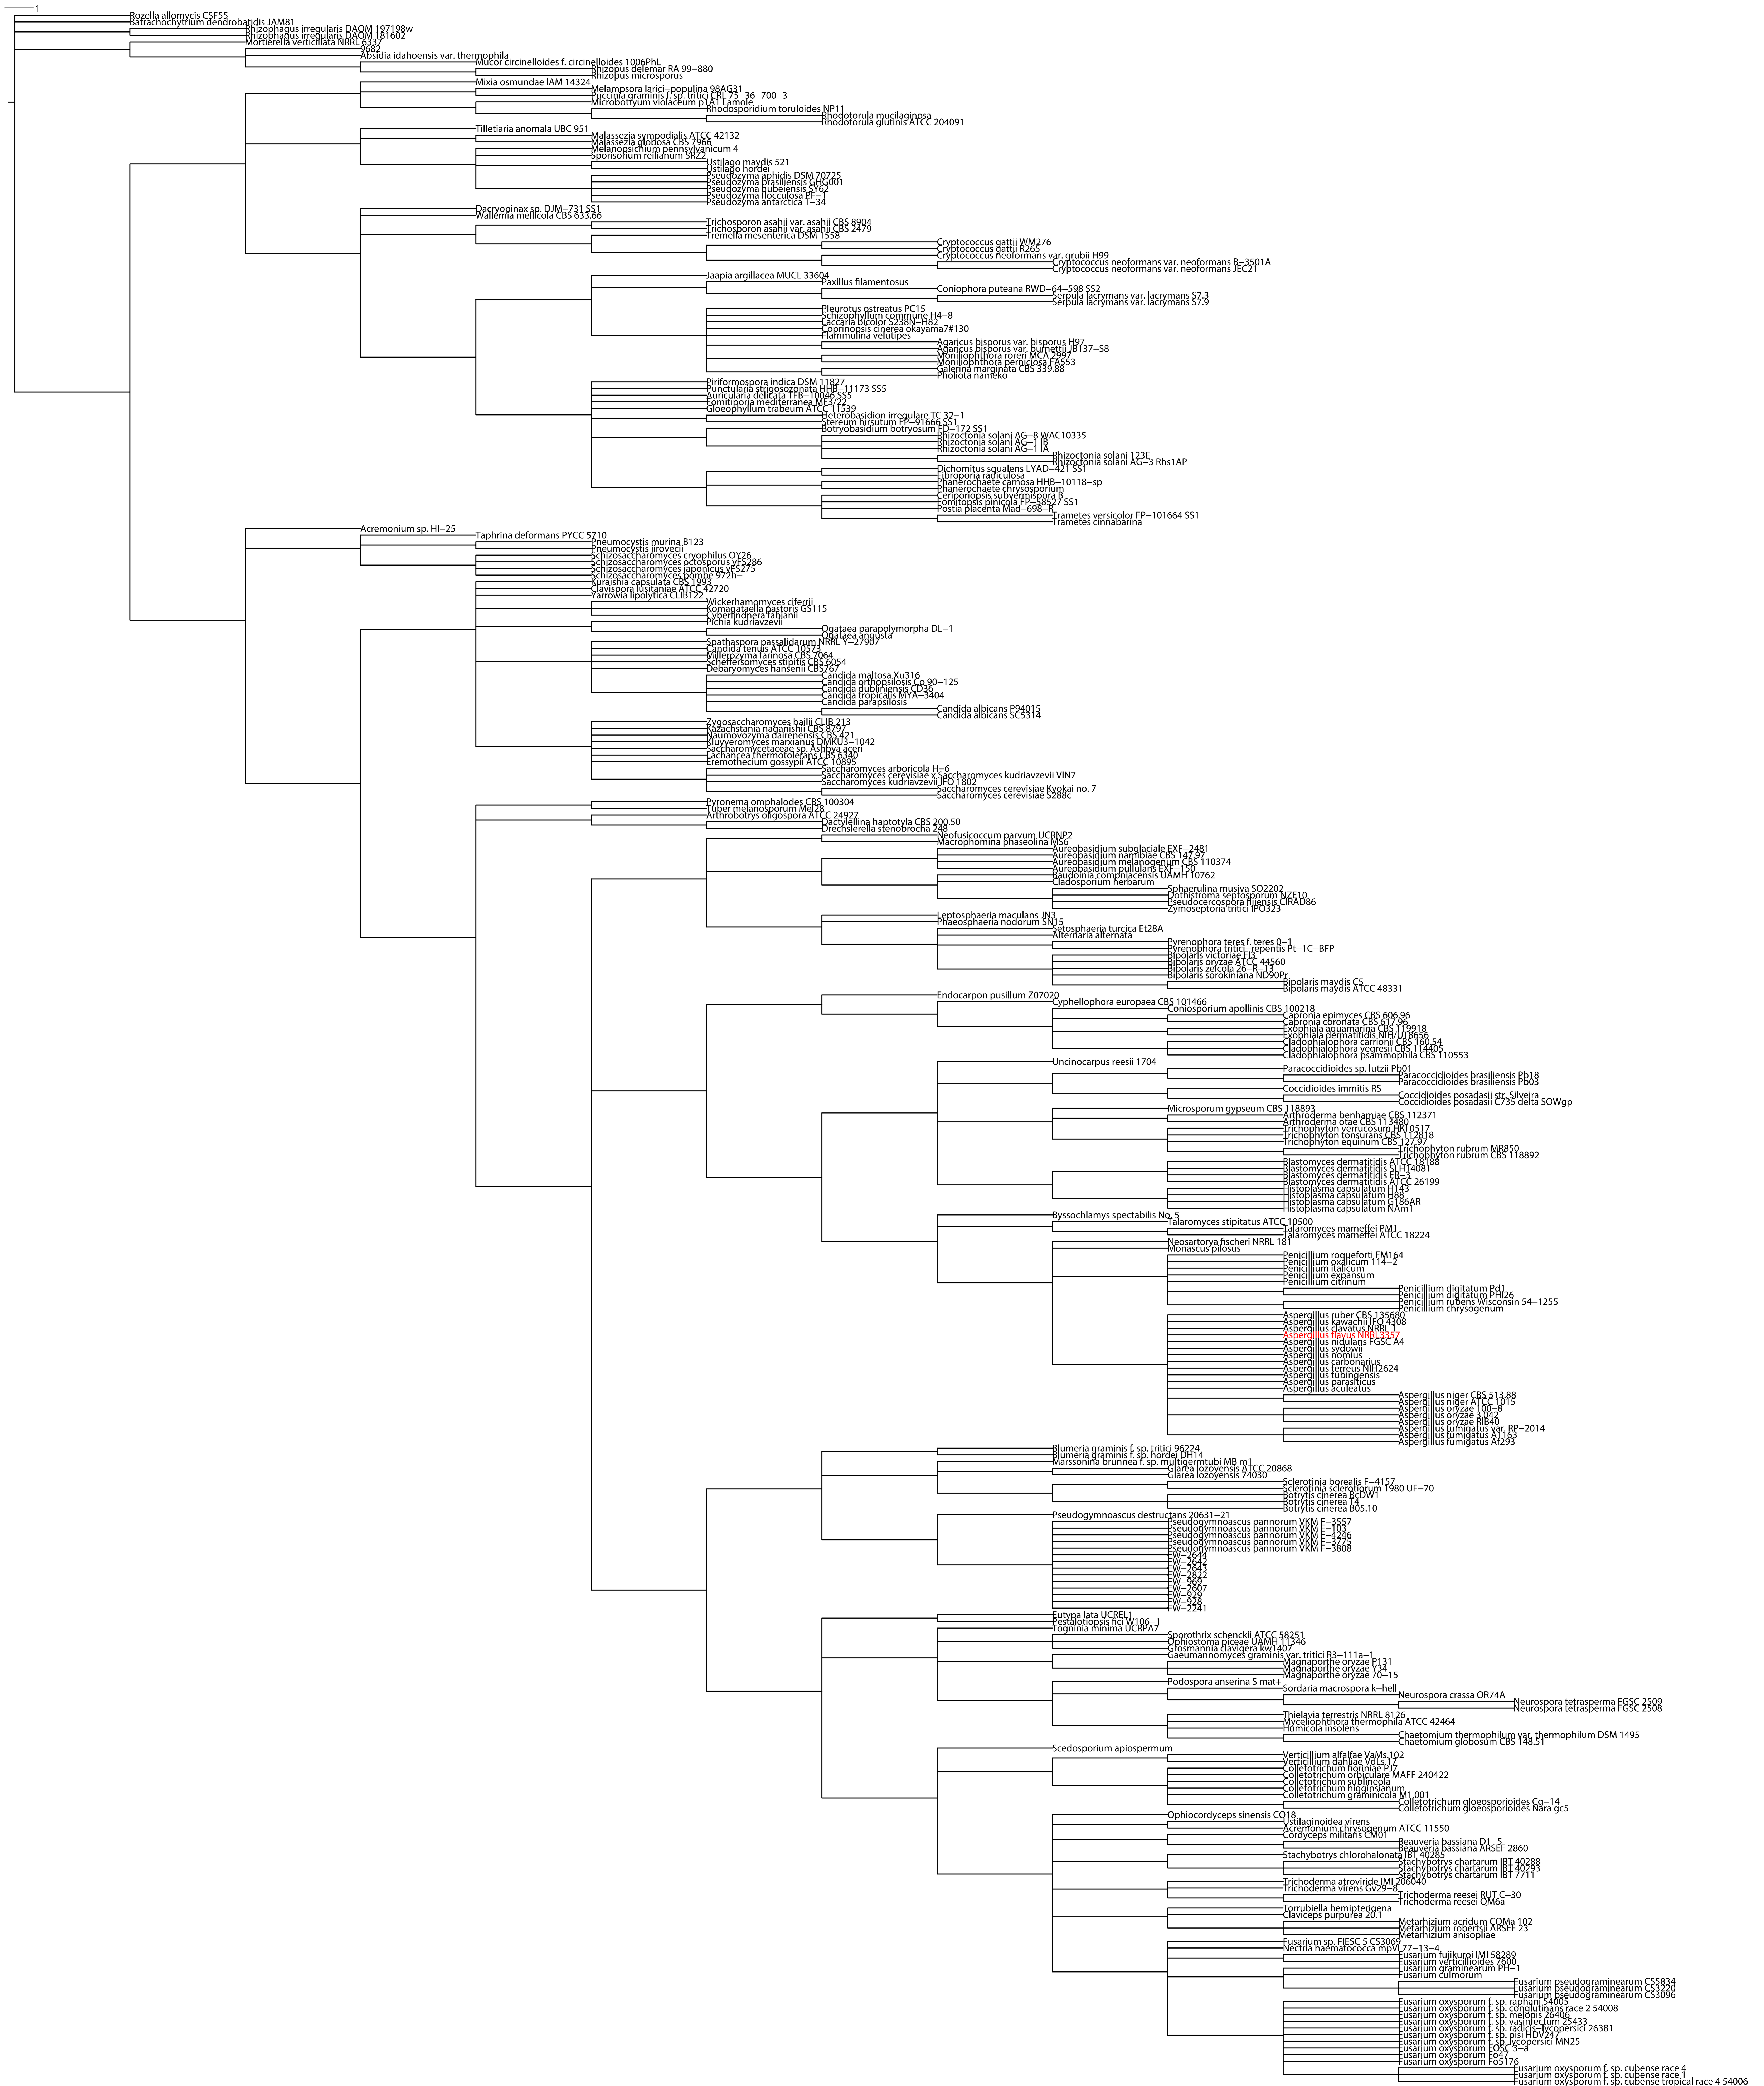

Supplement: s1 [file s1]
