# Supplementary material for: HGT-Finder: A New Tool for Horizontal Gene Transfer Finding and Application to Aspergillus genomes
Source: MDPI journal article supplement (doi:10.3390/toxins7104035), 2015-10-09
Supplement: s1 [file s1]

# **% of HTGs with best non-self BLAST hit from species of different taxonomic groups**

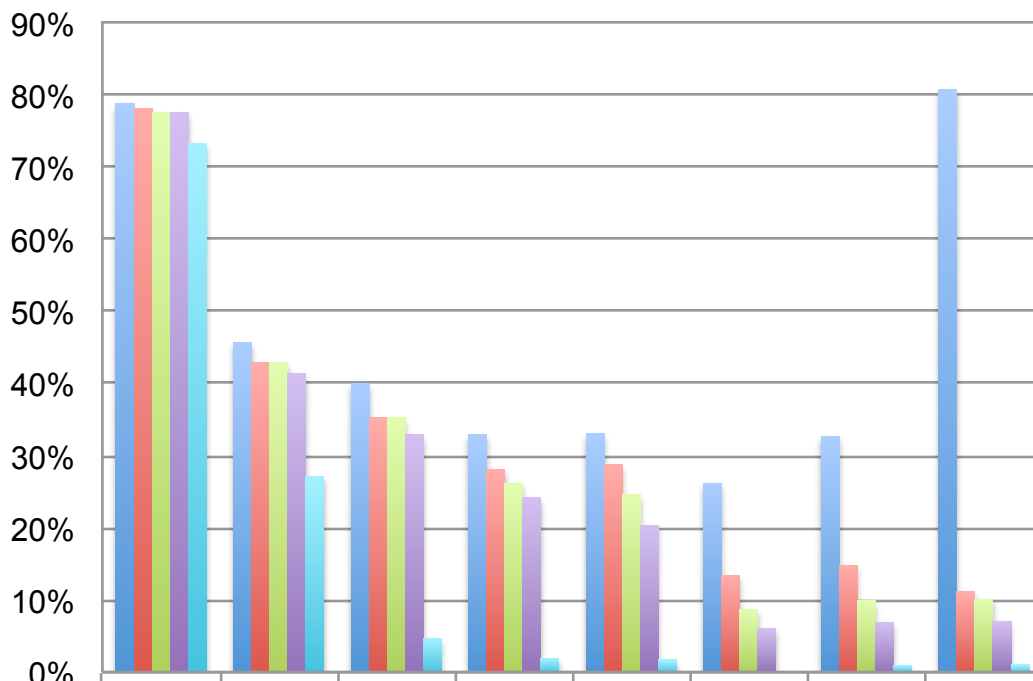

|                                          |     |     |     |     |     |     |     |     |
|------------------------------------------|-----|-----|-----|-----|-----|-----|-----|-----|
| not the same genus (Aspergillus)         | 79% | 46% | 40% | 33% | 33% | 26% | 33% | 81% |
| not the same family (Aspergillaceae)     | 78% | 43% | 35% | 28% | 29% | 13% | 15% | 11% |
| not the same order (Eurotiales)          | 78% | 43% | 35% | 26% | 25% | 9%  | 10% | 10% |
| not the same subclass (Eurotiomycetidae) | 78% | 41% | 33% | 24% | 20% | 6%  | 7%  | 7%  |
| not leotiomyceta                         | 73% | 27% | 5%  | 2%  | 2%  | 0%  | 1%  | 1%  |

# **% of HTGs with best non-self BLAST hit from species of different taxonomic groups**

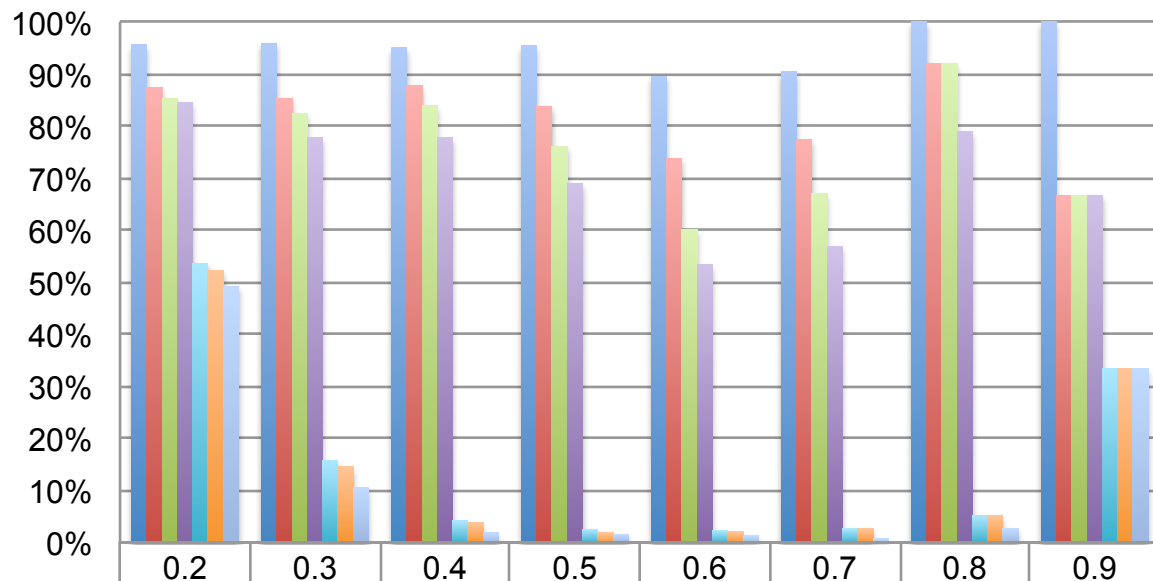

|                                          |     |     |     |     |     |     |      |        |
|------------------------------------------|-----|-----|-----|-----|-----|-----|------|--------|
| not the same genus (Aspergillus)         | 96% | 96% | 95% | 95% | 90% | 90% | 100% | 100.0% |
| not the same family (Aspergillaceae)     | 88% | 85% | 88% | 84% | 74% | 77% | 92%  | 66.7%  |
| not the same order (Eurotiales)          | 85% | 82% | 84% | 76% | 60% | 67% | 92%  | 66.7%  |
| not the same subclass (Eurotiomycetidae) | 85% | 78% | 78% | 69% | 53% | 57% | 79%  | 66.7%  |
| not leotiomyceta                         | 54% | 16% | 4%  | 3%  | 2%  | 3%  | 5%   | 33.3%  |
| not saccharomyceta                       | 52% | 15% | 4%  | 2%  | 2%  | 3%  | 5%   | 33.3%  |
| not Dikarya                              | 49% | 11% | 2%  | 2%  | 1%  | 1%  | 3%   | 33.3%  |
